# Supplementary material
Source: publisher figshare collection journal article supplement (https://gsajournals.figshare.com/ndownloader/files/13491620)
Supplement: Supplementary file 1 [file 13491620]

## Sheet: logfc.indiv.p.all.p
AFLA_ID	M6.C6.logfc	M6.C6.p.val	M6.R6.logfc	M6.R6.p.val	M24.C24.logfc	M24.C24.p.val	M24.R24.logfc	M24.R24.p.val	M48.C48.logcf	M48.C48.p.val	M48.R48.logcf	M48.R48.p.val	R6.C6.logfc	R6.C6.p.val	R24.C24.logfc	R24.C24.p.val	R48.C48.logfc	R48.C48.p.val	Adj.p.val
AFLA_000010	1.77636e-15	1	-1.77636e-15	1	3.55271e-15	1	8.88178e-16	1	0	1	-1.77636e-15	1	3.55271e-15	1	2.66454e-15	1	1.77636e-15	1	1
AFLA_000020	1.77636e-15	1	-1.77636e-15	1	3.55271e-15	1	8.88178e-16	1	0	1	-1.77636e-15	1	3.55271e-15	1	2.66454e-15	1	1.77636e-15	1	1
AFLA_000330	-1.59526	0.000711761	-1.83909	0.000131006	-3.44023	8.44986e-11	-2.94835	9.86143e-09	-1.4344	0.000102683	-1.61361	0.00011257	0.243828	1	-0.491877	0.311355	0.179212	0.897496	0.752723
AFLA_000340	1.77636e-15	1	-8.88178e-16	1	-2.5266	0.00843226	-2.20744	0.030933	-0.359693	0.716534	-0.843231	0.405178	2.66454e-15	1	-0.319161	0.86454	0.483538	0.868935	5.27245e-05
AFLA_000350	-2.50906	0.00684181	-2.42512	0.0092838	-3.26813	9.85916e-05	-3.12377	0.000371374	-1.74421	0.012819	-1.63781	0.0395205	-0.0839414	1	-0.144361	0.967585	-0.106393	1	0.723749
AFLA_000360	-1.97205	0.101541	-8.88178e-16	1	-1.6641	0.103011	-1.43458	0.199682	1.7974	0.0416989	-0.194004	0.907487	-1.97205	0.642541	-0.229519	0.935849	1.9914	0.173754	0.389896
AFLA_000370	-1.41923	0.280696	-0.746736	0.640391	-2.4962	0.0165278	-0.981701	0.423197	1.45267	0.111973	0.839421	0.451798	-0.672496	1	-1.5145	0.217699	0.613246	0.824179	0.113104
AFLA_000380	0.0333986	1	-0.350001	0.890154	1.35904	0.210683	-0.613392	0.655366	-0.10112	0.969692	-0.224399	0.891266	0.3834	1	1.97243	0.0974858	0.123279	1	0.357221
AFLA_000390	1.6029	0.233762	0.936947	0.550361	1.64739	0.133823	1.26415	0.305118	-1.25408	0.191389	-1.88277	0.0818769	0.665952	1	0.383237	0.850744	0.628696	0.829091	0.426181
AFLA_000500	-0.731517	0.695306	0.109091	1	0.537984	0.71317	-0.598527	0.712978	3.1614	0.00294203	3.86611	0.0014706	-0.840609	1	1.13651	0.460748	-0.704713	0.824543	0.256957
AFLA_000510	1.62217	0.0896387	0.956215	0.366523	-4.87702	1.69865e-07	-4.41215	2.91103e-06	2.98576	6.6746e-05	3.59314	2.8325e-05	0.665952	1	-0.464867	0.701118	-0.607382	0.738258	0.256542
AFLA_000520	3.3719	1.30695e-18	1.8135	2.22191e-11	0.125419	0.526491	-0.647479	0.000782841	1.02774	3.17872e-08	0.873319	6.06489e-06	1.5584	1.45237e-06	0.772898	0.000134229	0.154417	0.67255	0.820342
AFLA_000530	-1.0441	0.00594112	-0.899292	0.0185514	-1.15011	0.000604555	-0.813549	0.019809	0.321678	0.272106	-0.211812	0.558121	-0.14481	1	-0.336557	0.416106	0.53349	0.288455	0.323716
AFLA_000540	-0.164814	0.815964	-0.245304	0.694822	-0.171899	0.716872	0.323771	0.487602	3.25197	6.98898e-12	2.87478	2.34389e-09	0.0804904	1	-0.49567	0.288124	0.377194	0.612088	1
AFLA_000550	-1.51503	2.92409e-06	-1.55177	2.01544e-06	-2.0408	5.78005e-10	-1.68838	1.06549e-07	0.98877	4.08135e-05	1.18975	1.67988e-05	0.0367333	1	-0.352426	0.249987	-0.200981	0.724241	1
AFLA_000560	1.77636e-15	1	-0.91651	0.10816	0.571832	0.245179	0.110361	0.908891	0	1	-1.77636e-15	1	0.91651	0.651695	0.461471	0.446949	1.77636e-15	1	1
AFLA_000570	1.77636e-15	1	-1.77636e-15	1	0.416381	0.463169	0.416381	0.506142	0.841753	0.0632034	0.218263	0.726708	3.55271e-15	1	2.66454e-15	1	0.623491	0.482917	1
AFLA_000580	1.77636e-15	1	-1.77636e-15	1	3.55271e-15	1	8.88178e-16	1	0	1	-1.77636e-15	1	3.55271e-15	1	2.66454e-15	1	1.77636e-15	1	1
AFLA_000590	-1.4619	0.0259743	-1.2413	0.0636552	-0.60049	0.310908	-0.63568	0.325316	3.08801	1.04344e-07	2.69659	9.96654e-06	-0.2206	1	0.0351901	1	0.391412	0.771037	1
AFLA_000600	0.646596	0.205763	0.318117	0.610313	-0.0797718	0.91816	-0.808271	0.0709665	4.20416	5.58049e-14	3.98139	5.70158e-12	0.328479	1	0.728499	0.122701	0.222768	0.85351	0.110705
AFLA_000610	-2.63954	0.00110968	-3.95743	4.63017e-06	-2.22972	0.00144817	-3.33067	2.13742e-05	1.13251	0.0600864	1.27371	0.063764	1.3179	0.660234	1.10095	0.16657	-0.141203	1	1
AFLA_000620	1.77636e-15	1	-1.77636e-15	1	3.55271e-15	1	8.88178e-16	1	0	1	-1.77636e-15	1	3.55271e-15	1	2.66454e-15	1	1.77636e-15	1	0.670121
AFLA_000630	-0.663702	0.26964	-8.88178e-16	1	-0.49813	0.3224	0	1	0.334343	0.45367	0.334343	0.522591	-0.663702	0.89459	-0.49813	0.408519	1.77636e-15	1	1
AFLA_000640	-1.00979	0.102819	-1.89416	0.0018621	-0.34483	0.55798	-2.24405	0.000104133	2.28705	5.09298e-06	2.89728	7.25871e-07	0.884375	0.759834	1.89922	0.00104803	-0.610222	0.498394	0.118362
AFLA_000650	1.77636e-15	1	-1.77636e-15	1	-4.41636	1.1079e-08	-5.19417	1.09398e-09	2.1131	0.000277783	3.29461	2.80844e-06	3.55271e-15	1	0.777809	0.316071	-1.18151	0.207485	0.409877
AFLA_000660	-0.702021	0.548921	-0.204018	0.949782	-0.540322	0.568054	1.23141	0.178876	1.73389	0.0170553	1.64585	0.0465952	-0.498003	1	-1.77173	0.0554694	0.0880331	1	0.833312
AFLA_000680	-0.105964	0.996032	-0.144841	0.962105	-1.3555	0.0369479	0.58504	0.44807	0.933339	0.101693	0.845031	0.200888	0.038877	1	-1.94054	0.00687001	0.0883087	1	0.51069
AFLA_000690	0.251853	0.253888	-0.0924822	0.762497	-0.773803	3.70841e-05	-0.503314	0.00764837	1.14971	2.66409e-09	0.888966	4.23197e-06	0.344335	0.642258	-0.270489	0.187805	0.260745	0.354846	0.542085
AFLA_000700	-0.305668	0.890807	0.235944	0.949409	0.639252	0.555877	-0.492557	0.702611	-0.0305919	1	1.03635	0.295132	-0.541611	1	1.13181	0.334969	-1.06694	0.535349	0.0963211
AFLA_000710	0.0814043	0.92702	-0.660624	0.0693804	-1.12181	0.000379094	-0.904421	0.00581767	1.2429	1.80845e-05	1.07447	0.000608231	0.742028	0.417626	-0.217392	0.60977	0.168431	0.84556	0.177964
AFLA_000720	-0.520244	0.0260948	-0.445676	0.0615016	-0.66794	0.00111063	-0.451654	0.0358438	0.380762	0.0301418	0.13574	0.538756	-0.074569	1	-0.216287	0.390115	0.245022	0.475894	1
AFLA_000730	-0.331456	0.127359	-0.437373	0.0401284	-0.623081	0.000764603	-0.803194	7.31843e-05	0.0729838	0.691951	-0.308322	0.0886058	0.105917	1	0.180113	0.434283	0.381306	0.139015	2.80806e-08
AFLA_000740	0.26123	0.326709	0.134084	0.687023	0.0914055	0.719927	0.664221	0.00302231	1.85916	1.46161e-12	1.56779	1.67118e-09	0.127147	1	-0.572816	0.0126022	0.291372	0.388643	0.31832
AFLA_000750	-0.216949	0.614959	-0.416459	0.262749	1.42695	7.94835e-06	1.3802	3.23328e-05	-0.301306	0.251024	-0.214545	0.502031	0.19951	1	0.0467479	0.98083	-0.0867611	0.967366	0.98202
AFLA_000760	0.408309	0.136542	0.771272	0.00374238	0.0992604	0.722166	0.0484339	0.922445	-0.604825	0.00276079	-0.455928	0.0441238	-0.362964	0.811389	0.0508265	0.937793	-0.148898	0.791712	0.546078
AFLA_000770	-0.832728	0.0672982	-1.10496	0.0142553	-0.723942	0.0617644	-0.0226211	1	1.27481	0.000295981	1.6675	4.58371e-05	0.272231	1	-0.701321	0.109081	-0.392695	0.586583	0.000439647
AFLA_000780	1.87676	1.83056e-11	1.19137	4.14059e-07	1.59766	4.91621e-11	1.30371	1.71843e-08	0.827233	2.89292e-06	0.938401	2.7866e-06	0.685384	0.0634128	0.293954	0.159218	-0.111168	0.812982	0.23094
AFLA_000790	1.4096	4.41768e-08	1.40682	4.67635e-08	0.831516	4.43775e-05	0.92464	2.23589e-05	2.20038	1.96949e-15	2.19254	6.55384e-14	0.00277725	1	-0.0931237	0.761803	0.0078456	1	0.00700738
AFLA_000800	-0.0879039	1	-0.553818	0.645002	3.14326	0.000120443	2.29881	0.006009	1.14969	0.0929167	1.14969	0.144336	0.465915	1	0.844454	0.386636	1.77636e-15	1	0.0109292
AFLA_000810	-0.000563727	1	0.0699718	0.761821	0.103461	0.479562	0.0840098	0.620827	0.414377	0.00057255	0.251184	0.0582882	-0.0705355	1	0.019451	0.987284	0.163193	0.472463	0.0475012
AFLA_000820	-0.425815	0.50327	-0.104675	0.960583	-0.0279143	1	-0.225945	0.720126	1.35617	0.00106089	1.73579	0.0002788	-0.32114	1	0.19803	0.799919	-0.379624	0.702509	0.785968
AFLA_000830	-0.742434	0.013838	-0.652965	0.0323159	0.0391875	0.950677	-0.500406	0.0740734	1.65174	4.72708e-09	0.718626	0.00580788	-0.0894689	1	0.539594	0.0630001	0.933119	0.00593682	0.135795
AFLA_000840	2.84908	1.56903e-10	2.0941	1.3945e-07	-6.06261	7.81716e-21	-3.70296	4.08837e-14	-0.651082	0.0136574	-0.373891	0.224501	0.754977	0.385478	-2.35965	4.93115e-09	-0.277191	0.645808	0.128671
AFLA_000850	-1.10808	0.375375	-1.6486	0.159931	-4.39429	1.97685e-05	-2.46931	0.0159776	4.37351	2.8815e-06	2.78105	0.00393957	0.540515	1	-1.92499	0.0728402	1.59245	0.27692	0.353231
AFLA_000860	-0.320243	0.0334998	-0.570965	0.000219919	0.270885	0.0359255	0.0740033	0.661262	-0.915134	4.05237e-10	-1.12732	5.66313e-11	0.250721	0.646957	0.196882	0.191298	0.212183	0.284071	0.812685
AFLA_000870	-3.58505	1.95298e-10	-3.32413	1.15913e-09	-1.16241	0.00266334	-2.00606	5.94183e-06	-2.85773	1.18555e-10	-2.78432	3.59987e-09	-0.260922	1	0.843643	0.047357	-0.0734148	1	0.770824
AFLA_000880	0.485823	0.765352	0.485823	0.776957	0.125711	0.967698	0.189848	0.934152	1.9021	0.0246725	0.44523	0.696223	2.66454e-15	1	-0.0641366	1	1.45687	0.343224	1
AFLA_000890	-2.7136	1.82954e-08	-1.89302	1.53281e-05	-3.62327	1.17688e-12	-2.37439	6.89844e-08	-0.228381	0.494214	-0.0503934	0.94548	-0.820586	0.465705	-1.24888	0.0015736	-0.177987	0.87051	0.833312
AFLA_000900	2.66454e-15	1	-8.88178e-16	1	-0.617786	0.61348	-0.220845	0.924963	-0.559773	0.582761	0.663122	0.570814	3.55271e-15	1	-0.396941	0.835493	-1.22289	0.50821	1
AFLA_000910	1.57722	0.250418	0.865407	0.596069	3.25049	0.00333499	1.4815	0.225708	1.27589	0.189599	0.896483	0.445338	0.711813	1	1.769	0.161897	0.379411	0.943424	0.728949
AFLA_000920	-0.234831	0.299303	-0.459567	0.0279553	-0.591353	0.00113407	-0.081195	0.743056	0.148094	0.3628	0.206208	0.260358	0.224735	0.936366	-0.510158	0.00962667	-0.0581138	0.951381	0.0379167
AFLA_000930	-0.11272	0.82623	-0.421506	0.218031	-0.532068	0.0527043	-0.247753	0.446035	4.17764	7.50226e-19	3.58859	1.64221e-15	0.308786	0.977016	-0.284315	0.411711	0.589054	0.129488	0.342977
AFLA_000940	-0.84076	0.31344	-1.11536	0.164352	-1.74764	0.00779729	-1.2674	0.0724088	0.660795	0.259355	0.614698	0.371817	0.274603	1	-0.480242	0.595856	0.0460972	1	0.814288
AFLA_000950	-0.446115	0.699467	0.4619	0.700315	-2.23456	0.00276182	-2.05665	0.00922369	1.9629	0.00275924	0.711173	0.358103	-0.908016	0.941765	-0.177912	0.926883	1.25172	0.263055	0.0284458
AFLA_000960	-2.48257	0.0300727	-0.264891	0.933924	-2.65237	0.00718347	-1.71672	0.107944	1.89989	0.0269879	1.71623	0.0805181	-2.21768	0.491487	-0.935651	0.458828	0.183653	1	0.293108
AFLA_000970	-1.79106	0.0861059	-0.0393249	1	0.469317	0.651728	0.819093	0.429942	1.33548	0.0833453	0.715835	0.447604	-1.75173	0.624249	-0.349776	0.822067	0.619646	0.765841	0.820342
AFLA_000980	1.77636e-15	1	-0.665952	0.357789	-0.380688	0.540508	-0.922688	0.125559	0.391068	0.447911	0.391068	0.51759	0.665952	0.94756	0.542	0.443024	1.77636e-15	1	1
AFLA_000990	-0.381357	0.795576	-1.37204	0.183634	2.88801	0.000743639	3.40932	0.000221862	4.43478	1.92573e-07	5.32239	5.92265e-08	0.990687	0.953554	-0.521311	0.669312	-0.887603	0.561738	1
AFLA_001000	0.498395	0.118631	0.144149	0.752878	2.69158	1.63851e-12	3.138	1.27815e-13	3.89494	2.31626e-18	4.22863	8.59791e-18	0.354247	0.916753	-0.446421	0.144105	-0.333694	0.460151	0.487727
AFLA_001010	-0.464591	0.170844	-0.206011	0.626782	0.440536	0.118451	-0.524134	0.0817016	1.15155	1.39705e-05	-0.856914	0.0023498	-0.25858	1	0.96467	0.00186506	2.00846	2.15834e-07	0.0276034
AFLA_001020	2.16261	0.0534819	0.980093	0.454758	1.7808	0.062824	-0.308995	0.841839	0.733469	0.404641	2.12014	0.0256504	1.18252	0.941629	2.0898	0.0490487	-1.38667	0.366418	0.011737
AFLA_001030	1.01131	0.515714	0.972431	0.549897	-0.252583	0.891599	0.44775	0.784825	-2.00768	0.0406488	-1.53528	0.17715	0.038877	1	-0.700333	0.668896	-0.4724	0.908879	1
AFLA_001040	-0.313894	0.457865	-0.519806	0.178218	-0.507607	0.109341	-0.512703	0.134268	-0.376045	0.175661	-0.100682	0.80574	0.205912	1	0.00509686	1	-0.275363	0.668172	1
AFLA_001050	-0.642458	0.575464	0	1	-1.03037	0.211633	-0.461217	0.659247	-4.11422	3.46982e-07	-3.65672	1.9972e-05	-0.642458	1	-0.569152	0.609757	-0.4575	0.834518	1.80088e-08
AFLA_001060	-1.02821	0.217027	-0.430687	0.690988	-0.050411	1	1.40432	0.0523556	-1.63171	0.00603636	-0.766585	0.269525	-0.597522	1	-1.45473	0.0525754	-0.865126	0.443352	1
AFLA_001070	-0.0329161	1	-0.430433	0.211596	-0.704099	0.011162	-0.356365	0.251334	1.3991	4.70433e-07	1.44634	2.34088e-06	0.397517	0.878425	-0.347734	0.298926	-0.047232	1	0.907063
AFLA_001080	0.227857	0.881694	0.199793	0.918032	0.416381	0.597259	-0.540048	0.515314	0.702711	0.250895	0.702711	0.323029	0.0280646	1	0.95643	0.238314	1.77636e-15	1	0.0632499
AFLA_001090	0.265823	0.737091	0.349927	0.640363	0.559001	0.271994	-0.0399072	1	2.27505	1.98227e-06	2.85107	3.1168e-07	-0.084104	1	0.598908	0.313052	-0.576027	0.495508	0.0408044
AFLA_001100	-1.45519	0.234725	0.461934	0.796582	0.050169	1	0.571832	0.655955	1.77444	0.0392039	0.559529	0.61508	-1.91713	0.643704	-0.521663	0.733109	1.21491	0.468844	0.539202
AFLA_001110	-0.76866	0.0161138	-0.144657	0.761821	0.234606	0.431848	0.621781	0.034868	-0.303005	0.215758	-0.028353	0.97592	-0.624003	0.487543	-0.387175	0.234942	-0.274652	0.597342	4.87783e-10
AFLA_001120	1.77636e-15	1	-1.77636e-15	1	3.55271e-15	1	8.88178e-16	1	0	1	-1.77636e-15	1	3.55271e-15	1	2.66454e-15	1	1.77636e-15	1	1
AFLA_001130	1.77636e-15	1	-1.77636e-15	1	3.55271e-15	1	8.88178e-16	1	0	1	-1.77636e-15	1	3.55271e-15	1	2.66454e-15	1	1.77636e-15	1	1
AFLA_001140	1.77636e-15	1	-1.77636e-15	1	3.55271e-15	1	8.88178e-16	1	0	1	-1.77636e-15	1	3.55271e-15	1	2.66454e-15	1	1.77636e-15	1	1
AFLA_001150	1.77636e-15	1	-1.77636e-15	1	3.55271e-15	1	8.88178e-16	1	0	1	-1.77636e-15	1	3.55271e-15	1	2.66454e-15	1	1.77636e-15	1	1
AFLA_001160	1.77636e-15	1	-1.77636e-15	1	3.55271e-15	1	8.88178e-16	1	0	1	-1.77636e-15	1	3.55271e-15	1	2.66454e-15	1	1.77636e-15	1	1
AFLA_001170	1.77636e-15	1	-1.77636e-15	1	3.55271e-15	1	8.88178e-16	1	0	1	-1.77636e-15	1	3.55271e-15	1	2.66454e-15	1	1.77636e-15	1	1
AFLA_001180	-0.31859	0.0340229	-0.162113	0.331681	0.137975	0.307878	0.10561	0.496538	0.136615	0.234547	-0.144085	0.277944	-0.156477	0.94486	0.0323654	0.921102	0.2807	0.121706	0.0739169
AFLA_001190	2.66454e-15	1	-0.711813	0.425306	0.154871	0.884225	0.641466	0.406001	0.937415	0.105532	0.937415	0.16029	0.711813	0.99062	-0.486595	0.59381	1.77636e-15	1	7.0897e-07
AFLA_001200	-2.64823	0.00188973	-2.41559	0.0045707	-1.13825	0.123227	-1.06151	0.187392	-0.63095	0.340431	-1.17886	0.107033	-0.232642	1	-0.0767448	1	0.547908	0.739897	0.820342
AFLA_001210	-0.598256	0.0358268	-0.566819	0.0495021	-0.731363	0.00302441	-0.703943	0.00710165	-0.0956457	0.702568	-0.0696771	0.833984	-0.031437	1	-0.0274199	1	-0.0259686	1	0.0544081
AFLA_001220	-0.752639	8.02313e-05	-0.760589	7.41188e-05	-0.66089	7.40256e-05	-0.732443	4.06884e-05	0.0493565	0.773651	0.226489	0.156911	0.00795097	1	0.0715524	0.783507	-0.177132	0.532329	0.00387669
AFLA_001230	-1.51898	0.18111	0	1	1.33331	0.160111	0.735153	0.514429	-3.1258	0.000235141	-2.55195	0.00615248	-1.51898	0.793506	0.598153	0.655378	-0.573859	0.811226	0.294265
AFLA_001240	-0.0994664	0.787989	-0.74621	0.00270793	0.0207341	0.992487	0.155474	0.552166	1.45647	8.86023e-10	1.38664	3.58547e-08	0.646743	0.192795	-0.134739	0.662341	0.0698283	0.950817	0.558839
AFLA_001250	-1.44266	0.238056	-0.144841	1	-0.450902	0.70601	-0.541855	0.675835	0.1042	0.960909	1.17116	0.244673	-1.29782	0.91812	0.0909534	1	-1.06696	0.550332	1
AFLA_001260	-1.10537	0.405072	-1.28165	0.324666	-1.18813	0.256146	0.0355402	1	0.00915362	1	-0.151277	0.939462	0.176279	1	-1.22367	0.317815	0.16043	1	0.820342
AFLA_001270	2.66454e-15	1	-2.47679	0.000417223	-2.19006	0.000328607	-1.51875	0.0160386	-1.1826	0.0219202	-1.368	0.0199382	2.47679	0.0297435	-0.671313	0.357334	0.185396	0.958089	0.0284564
AFLA_001280	1.77636e-15	1	-1.77636e-15	1	3.55271e-15	1	8.88178e-16	1	0	1	-1.77636e-15	1	3.55271e-15	1	2.66454e-15	1	1.77636e-15	1	1
AFLA_001290	1.77636e-15	1	-1.77636e-15	1	3.55271e-15	1	8.88178e-16	1	0	1	-1.77636e-15	1	3.55271e-15	1	2.66454e-15	1	1.77636e-15	1	1
AFLA_001300	1.77636e-15	1	-1.77636e-15	1	3.55271e-15	1	8.88178e-16	1	0	1	-1.77636e-15	1	3.55271e-15	1	2.66454e-15	1	1.77636e-15	1	1
AFLA_001310	-1.36353	0.163075	1.62572	0.0915512	-0.874122	0.299919	0.277305	0.826386	-2.0864	0.0034345	-2.11766	0.0085095	-2.98925	0.0704937	-1.15143	0.226217	0.03126	1	1
AFLA_001320	-0.356424	0.88054	-0.0511746	1	2.33554	0.0282706	2.08826	0.0689132	0.451733	0.674337	-0.780525	0.500918	-0.305249	1	0.247287	0.932296	1.23226	0.509856	1
AFLA_001330	-0.657012	0.311791	-0.398473	0.600376	-0.458532	0.404129	0.539595	0.359726	1.21683	0.00674819	0.570381	0.277917	-0.258539	1	-0.998127	0.0813304	0.646444	0.452042	0.629009
AFLA_001340	-0.369262	0.0362008	0.0132948	1	-0.179734	0.251974	0.47276	0.00357929	0.299634	0.0232279	0.216919	0.155365	-0.382557	0.375551	-0.652494	0.000154483	0.0827149	0.84725	0.357601
AFLA_001350	-1.58735	0.0107783	-1.40187	0.0257727	0.444958	0.44663	0.0273598	1	0.348392	0.490756	1.08641	0.0418461	-0.185479	1	0.417598	0.567468	-0.738016	0.400396	4.57127e-05
AFLA_001360	-0.546324	0.18173	-0.621309	0.124998	-1.172	0.000639808	-0.8088	0.0238422	-0.674104	0.0213177	-0.476664	0.159419	0.0749857	1	-0.363197	0.385242	-0.19744	0.824043	0.272543
AFLA_001370	-0.555492	0.635209	-0.176621	0.961349	-0.114808	0.954404	-0.0757953	1	1.24663	0.0692697	1.08757	0.171058	-0.378871	1	-0.0390131	1	0.159066	1	0.111445
AFLA_001380	-2.2248	0.0230892	-0.633205	0.618416	0.891471	0.314165	2.81994	0.00194395	1.69324	0.0215593	0.824189	0.349551	-1.59159	0.67364	-1.92847	0.0394769	0.869052	0.578036	0.924981
AFLA_001390	-0.642458	0.541928	0	1	-0.442332	0.611197	-1.85675	0.0205568	0.0324076	1	0.802949	0.300991	-0.642458	1	1.41442	0.0948933	-0.770541	0.58051	0.0391133
AFLA_001400	-0.32759	0.323437	-0.441312	0.165175	-0.208676	0.462756	-0.115782	0.750193	-0.323913	0.15703	0.0699215	0.84661	0.113722	1	-0.0928942	0.84805	-0.393835	0.33676	0.176625
AFLA_001410	0.4619	0.741122	0.4619	0.753809	-0.951582	0.288025	-1.97121	0.0315787	-0.561522	0.486187	-1.64643	0.0538664	3.55271e-15	1	1.01963	0.330369	1.08491	0.452983	0.091925
AFLA_001420	-1.03965	0.440271	-2.74005	0.0197713	-0.701719	0.534178	-1.73508	0.112431	0.247951	0.833533	-1.27377	0.213964	1.7004	0.765835	1.03336	0.417622	1.52172	0.338749	0.670121
AFLA_001430	-0.722441	0.0330977	-0.942827	0.00549156	-1.89825	3.81396e-08	-1.57294	3.5876e-06	0.143186	0.615333	0.696956	0.0161772	0.220386	1	-0.325305	0.366504	-0.55377	0.193537	1
AFLA_001440	-0.877897	0.00113966	-1.07084	0.000110462	-1.38744	1.78203e-07	-1.21766	5.00286e-06	0.506105	0.0119843	0.152479	0.547197	0.192946	1	-0.169787	0.592978	0.353626	0.328112	0.311369
AFLA_001450	-1.47368	0.0917677	-1.44937	0.100879	-1.48938	0.0430274	-1.263	0.114521	0.531495	0.437751	0.216341	0.827137	-0.0243096	1	-0.226372	0.883202	0.315154	0.906273	0.014484
AFLA_001460	-0.0849948	0.729372	-0.151724	0.472272	0.392571	0.0101748	0.527886	0.00138862	0.747049	8.22845e-07	0.702272	1.75342e-05	0.0667295	1	-0.135315	0.499896	0.0447774	0.968402	0.636503
AFLA_001470	-0.464509	0.00517464	-0.815455	5.22693e-06	0.710298	5.58112e-06	0.634097	7.35803e-05	0.434239	0.000745845	0.46348	0.00140183	0.350945	0.407328	0.0762006	0.730018	-0.0292408	1	0.310868
AFLA_001480	-0.0281343	1	0.232722	0.646807	1.66707	4.13553e-06	1.0631	0.00271966	0.309444	0.296705	-0.351008	0.303379	-0.260856	1	0.603974	0.10504	0.660452	0.164804	0.706962
AFLA_001490	-0.642458	0.73177	-0.934968	0.585799	-0.044903	1	-0.176852	0.964965	-1.63696	0.10867	-2.61732	0.0236574	0.29251	1	0.131949	1	0.980362	0.69112	1
AFLA_001500	-1.48777	0.00127646	-1.10822	0.0159046	0.933136	0.0177493	0.123408	0.849725	-1.42003	9.6534e-05	-0.370799	0.370529	-0.379557	1	0.809728	0.0657704	-1.04923	0.049454	1
AFLA_001510	-1.22899	1.1422e-08	-0.971191	1.263e-06	1.78702	7.23936e-14	1.62821	3.38403e-12	-0.00607042	1	0.0805482	0.655913	-0.257798	0.79147	0.158818	0.425668	-0.0866186	0.844964	0.251399
AFLA_001520	-1.77699	0.00167512	-1.78092	0.00168972	0.769865	0.115494	1.30616	0.0114948	0.414276	0.345749	1.11359	0.0206849	0.00392363	1	-0.53629	0.371198	-0.699318	0.369187	0.00372894
AFLA_001530	-1.36297	3.6151e-08	-1.43967	1.16051e-08	0.36879	0.0447298	0.510118	0.00943571	0.757801	1.43493e-05	0.572698	0.00206528	0.0766991	1	-0.141328	0.572891	0.185102	0.591424	0.1076
AFLA_001540	-0.369848	0.831954	0.427628	0.798182	0.95185	0.324946	2.3584	0.0162414	4.61036	5.32316e-07	4.43058	8.61559e-06	-0.797476	1	-1.40655	0.188737	0.179777	1	0.316407
AFLA_001550	-0.617843	0.162576	-0.755144	0.0825202	-1.08497	0.00317623	-0.716412	0.0678471	-1.05738	0.00119156	-1.27083	0.000654392	0.1373	1	-0.368554	0.425624	0.213447	0.825418	2.05895e-09
AFLA_001560	-1.39503	0.0756381	-1.51	0.05509	0.778868	0.26029	1.20303	0.0948078	4.37318	2.21969e-09	1.15632	0.0817867	0.114974	1	-0.424163	0.658721	3.21686	0.000215055	5.01725e-07
AFLA_001570	-1.46782	5.42996e-05	-1.2746	0.000362702	-1.03408	0.000759568	-0.499057	0.127068	-0.324686	0.224543	-0.556404	0.0631033	-0.193218	1	-0.535022	0.11635	0.231718	0.72783	0.451383
AFLA_001580	-2.26341	0.0992456	-1.58296	0.281345	0.00179351	1	-1.27531	0.334902	0.866771	0.416079	1.31725	0.267092	-0.680445	1	1.27711	0.372342	-0.450476	0.924266	0.979086
AFLA_001590	-2.92859	0.0204379	-2.73383	0.032164	-0.500677	0.704802	-0.59323	0.680227	0.187679	0.901958	-0.381699	0.781738	-0.19476	1	0.0925525	1	0.569378	0.86078	0.624942
AFLA_001600	-1.94977	0.00498807	-2.83579	8.69645e-05	-4.98954	1.70541e-10	-5.03709	4.96979e-10	-1.25629	0.0162579	-1.0894	0.0677477	0.88602	0.862988	0.0475481	1	-0.166888	0.975265	0.871983
AFLA_001610	-0.908016	0.200822	0	1	-1.06594	0.0658755	-0.205421	0.81835	6.30211	7.79565e-15	4.21947	3.2977e-09	-0.908016	0.821962	-0.860517	0.204238	2.08264	0.00576903	0.251514
AFLA_001620	-0.610966	0.381051	-3.30865	1.2373e-06	-1.30279	0.0148454	-1.12841	0.0491377	7.10413	3.28231e-17	4.16369	7.78005e-10	2.69769	0.00523656	-0.174371	0.869758	2.94044	3.35749e-05	0.0911242
AFLA_001630	-0.563641	0.247253	0.108467	0.928126	-0.708235	0.0705891	-0.279025	0.562863	0.210382	0.576137	-0.103572	0.849765	-0.672108	0.751722	-0.42921	0.376928	0.313954	0.712121	1.36173e-11
AFLA_001640	-1.70887	0.02566	-2.12632	0.00566685	-3.43354	2.5187e-06	-2.61757	0.00029874	-6.7684	3.71907e-14	-6.84683	7.38525e-13	0.417451	1	-0.815966	0.307461	0.0784347	1	2.16504e-08
AFLA_001650	0.0826898	0.995776	0.0223662	1	0.918484	0.0702237	0.888647	0.105341	-2.80835	7.69245e-08	-3.28538	3.8092e-08	0.0603236	1	0.0298373	1	0.477036	0.631227	0.00433229
AFLA_001660	-1.10123	0.00223058	-2.0913	2.27546e-07	-0.340837	0.290689	-0.402654	0.243822	-0.0310478	0.96504	-0.25499	0.439682	0.990071	0.161679	0.0618167	0.954793	0.223942	0.75533	0.000155706
AFLA_001670	-0.356234	0.0754617	-0.977378	4.45267e-06	1.03211	1.56144e-07	0.617274	0.00083023	0.912032	1.48914e-07	1.11624	3.02411e-08	0.621144	0.0761476	0.414836	0.0273836	-0.204205	0.482917	0.198545
AFLA_001680	0.648841	0.727647	-0.410436	0.874827	1.47966	0.214911	1.49391	0.249646	-1.00113	0.340518	0.477261	0.733917	1.05928	1	-0.014257	1	-1.47839	0.447412	3.23722e-08
AFLA_001690	-0.507609	0.0183591	-0.839555	0.000162192	1.03119	8.2544e-07	0.48354	0.0146712	0.023394	0.943543	0.262828	0.161148	0.331946	0.717454	0.547651	0.00750001	-0.239434	0.439961	0.891032
AFLA_001700	0.308265	0.908711	-0.870478	0.572281	1.22735	0.261895	0.134803	0.981722	0.733465	0.454926	0.984961	0.373117	1.17874	0.978124	1.09255	0.41031	-0.251496	0.989588	1
AFLA_001710	0.807066	0.0177986	0.338537	0.384362	0.62369	0.0333982	1.32848	5.52892e-05	0.100321	0.746931	0.157503	0.638178	0.468528	0.810741	-0.704793	0.0301924	-0.0571818	1	0.951795
AFLA_001720	-0.201768	0.992718	-0.187909	1	0.181567	0.950045	0.963211	0.506142	0.519194	0.666268	1.86135	0.122412	-0.0138585	1	-0.781644	0.649677	-1.34215	0.531968	0.817281
AFLA_001730	-0.918344	7.1918e-07	-0.532749	0.0016438	0.682415	1.21516e-05	1.06639	9.36645e-09	1.70247	9.21795e-16	2.22117	1.92512e-17	-0.385594	0.317523	-0.383974	0.0157678	-0.518696	0.00587118	0.443356
AFLA_001740	0.078488	0.870537	0.0239111	1	0.0300075	0.9649	0.257267	0.316821	0.447954	0.0227608	0.120956	0.637603	0.0545769	1	-0.227259	0.426633	0.326998	0.365991	0.99262
AFLA_001750	-3.69724	3.35844e-16	-3.49612	1.43955e-15	0.266279	0.281614	0.14309	0.640017	-2.13281	1.19954e-12	-1.71715	3.90796e-09	-0.201125	1	0.123188	0.739902	-0.415658	0.239099	0.774786
AFLA_001760	1.77636e-15	1	-1.77636e-15	1	3.55271e-15	1	8.88178e-16	1	0	1	-1.77636e-15	1	3.55271e-15	1	2.66454e-15	1	1.77636e-15	1	0.835424
AFLA_001770	-3.32748	1.26841e-10	-2.86434	4.08214e-09	-2.38152	1.51212e-08	-2.24906	1.47649e-07	-0.158143	0.648549	0.171772	0.670813	-0.463145	0.916753	-0.132458	0.833119	-0.329914	0.629592	0.000644079
AFLA_001780	0.940898	0.521116	1.26874	0.360006	-1.00879	0.371507	-1.36718	0.2486	-11.6382	6.09042e-15	-11.8075	1.19565e-13	-0.327838	1	0.358395	0.860874	0.169375	1	0.910496
AFLA_001790	-3.59732	0.0011256	-3.20809	0.00351689	0.432019	0.705698	0.277692	0.863234	-4.79846	3.92353e-07	-4.86362	2.78031e-06	-0.389234	1	0.154326	0.978018	0.0651636	1	0.0142187
AFLA_001800	-0.682151	0.408581	-1.08572	0.154732	1.53034	0.0143929	1.24664	0.0636199	1.1177	0.0405168	0.983353	0.117057	0.403573	1	0.283697	0.782644	0.134351	1	0.313222
AFLA_001810	1.77636e-15	1	-0.711813	0.141402	3.55271e-15	1	-0.383237	0.411558	0.33375	0.358118	0.33375	0.432284	0.711813	0.719519	0.383237	0.453147	1.77636e-15	1	0.27374
AFLA_001820	-2.49277	0.0189082	-2.42623	0.0233385	1.04878	0.271273	1.01022	0.335536	-1.36513	0.088412	-0.216022	0.872506	-0.0665379	1	0.0385602	1	-1.14911	0.457364	0.338329
AFLA_001830	0.774348	0.0967824	0.390318	0.472098	3.75992	6.00141e-12	3.30293	5.02242e-10	4.85966	2.30523e-16	3.88221	2.58431e-12	0.38403	1	0.456991	0.342611	0.977454	0.0702936	0.000173591
AFLA_001840	-3.34932	0.000518224	-3.62442	0.000209615	0.882708	0.302491	-0.1044	0.981722	0.597987	0.430098	0.839758	0.322288	0.275102	1	0.987107	0.321204	-0.241771	0.96722	1
AFLA_001850	-2.9816	6.57641e-06	-1.64624	0.00792407	-1.85703	0.000654623	-0.833248	0.153083	1.94713	7.87311e-05	0.53122	0.338249	-1.33536	0.383132	-1.02378	0.0874546	1.41591	0.0496008	0.444202
AFLA_001860	1.77636e-15	1	-0.665952	0.188656	3.55271e-15	1	8.88178e-16	1	1.09285	0.00269226	1.09285	0.00771553	0.665952	0.797329	2.66454e-15	1	1.77636e-15	1	0.409877
AFLA_001870	0.336831	0.878494	-0.0392502	1	-0.292375	0.836943	0.819093	0.495524	-6.05618	1.23275e-08	-6.12098	1.19474e-07	0.376082	1	-1.11147	0.36789	0.0648011	1	1
AFLA_001880	1.77636e-15	1	-0.649843	0.653308	0.188971	0.909768	-0.593473	0.617554	-4.34016	2.0681e-06	-5.08962	1.10125e-06	0.649843	1	0.782444	0.530726	0.749456	0.713152	0.511655
AFLA_001890	0.404708	0.0706852	0.902155	8.60361e-05	-0.0840208	0.717721	-0.189701	0.39091	-1.06335	6.62084e-08	-1.01526	1.56949e-06	-0.497448	0.3403	0.10568	0.714311	-0.0480868	0.98519	0.205975
AFLA_001900	0.613829	0.000174972	0.578532	0.000381263	0.889534	4.1314e-08	0.974718	2.03703e-08	0.44988	0.000306274	0.313726	0.0212713	0.0352966	1	-0.0851836	0.669639	0.136154	0.598362	0.329884
AFLA_001910	0.248892	0.673069	0.305221	0.593209	0.673759	0.0817594	1.39378	0.000872418	0.977448	0.00409457	1.02936	0.00752549	-0.0563287	1	-0.720024	0.0976133	-0.0519147	1	0.255453
AFLA_001920	-0.798153	0.00176519	-0.42681	0.103528	-1.14684	2.21846e-06	-0.528591	0.023449	-3.37966	4.82803e-19	-3.34656	2.11955e-17	-0.371343	0.759923	-0.618245	0.0103514	-0.0331054	1	5.00891e-06
AFLA_001930	-0.208603	0.710056	0.263114	0.625442	0.0726133	0.908096	0.681649	0.0750028	-1.62416	2.74151e-06	-2.29476	4.31855e-08	-0.471717	0.916753	-0.609036	0.132988	0.670596	0.19802	0.0665409
AFLA_001940	0.796922	0.0385758	0.774034	0.0467413	2.08662	7.16956e-08	1.0072	0.00442178	-0.251092	0.409396	-0.140807	0.722073	0.022888	1	1.07941	0.00321052	-0.110285	0.948577	0.586925
AFLA_001950	0.364703	0.306645	0.934323	0.00435363	-2.66742	7.45711e-12	-1.90607	5.27982e-08	-2.7996	8.11081e-14	-2.81195	1.90151e-12	-0.56962	0.6028	-0.76135	0.0138604	0.0123485	1	0.179982
AFLA_001960	0.651696	0.00244226	0.735919	0.000730962	0.865227	1.38014e-05	0.871748	2.97895e-05	2.38458	7.33366e-17	1.16903	6.35655e-08	-0.0842234	1	-0.00652097	1	1.21555	1.30741e-06	6.99028e-06
AFLA_001970	2.08766	0.0892732	0.502845	0.786928	0.0621026	1	-0.102471	1	2.0904	0.0209241	2.18307	0.0340199	1.58481	0.84058	0.164574	0.9809	-0.0926719	1	0.218031
AFLA_001980	-0.908016	0.434329	0	1	-0.49813	0.623576	0	1	-3.42314	2.88699e-05	-2.8786	0.00114323	-0.908016	0.997216	-0.49813	0.704137	-0.544542	0.808522	1
AFLA_001990	-0.470495	0.749949	0.4619	0.767617	1.17635	0.200496	1.17635	0.239559	2.43197	0.00224331	2.73559	0.00246144	-0.932395	0.997216	2.66454e-15	1	-0.303615	0.945602	1
AFLA_002000	0.553152	0.164806	-1.44895	0.000219018	1.98803	1.63721e-07	0.238745	0.5537	2.04251	7.20598e-09	1.51594	1.6515e-05	2.00211	0.000470001	1.74928	7.43638e-06	0.52657	0.299503	0.0782976
AFLA_002010	-1.0521	0.442786	0.461934	0.807639	1.62969	0.115339	-0.443674	0.759981	-2.65973	0.00333767	-1.21667	0.24576	-1.51403	0.863233	2.07337	0.0697126	-1.44306	0.383542	0.311723
AFLA_002020	1.43359	0.185115	1.43359	0.189671	-0.429194	0.686323	-0.771638	0.465802	-7.91786	1.3789e-12	-7.93532	2.89581e-11	3.55271e-15	1	0.342443	0.828227	0.0174589	1	0.898258
AFLA_002030	-1.57592	0.000427847	-2.08841	8.8902e-06	-0.217599	0.621497	0.108458	0.869225	-1.76313	1.95754e-06	-1.42846	0.000260305	0.5125	0.906636	-0.326057	0.514492	-0.33467	0.664481	0.503799
AFLA_002040	1.77636e-15	1	-1.77636e-15	1	3.55271e-15	1	8.88178e-16	1	0	1	-1.77636e-15	1	3.55271e-15	1	2.66454e-15	1	1.77636e-15	1	1
AFLA_002050	1.77636e-15	1	-1.77636e-15	1	3.55271e-15	1	8.88178e-16	1	0	1	-1.77636e-15	1	3.55271e-15	1	2.66454e-15	1	1.77636e-15	1	1
AFLA_002060	-3.54947	7.37302e-05	-3.95657	1.5731e-05	-2.88506	0.000186491	-2.21444	0.00536381	-1.06321	0.102412	-0.959678	0.203386	0.407099	1	-0.670621	0.489881	-0.10353	1	0.196679
AFLA_002070	1.77636e-15	1	-1.77636e-15	1	3.55271e-15	1	-0.461471	0.252889	0.33375	0.303131	0.33375	0.378032	3.55271e-15	1	0.461471	0.286473	1.77636e-15	1	1
AFLA_002080	0.75306	0.0506979	0.674486	0.0860171	2.48194	1.70649e-09	2.47896	6.1553e-09	3.26565	9.17138e-14	3.51352	3.69648e-13	0.0785732	1	0.00298127	1	-0.247865	0.738258	1
AFLA_002090	-0.685799	0.000874851	-0.648011	0.00161381	-1.51665	7.18783e-11	-1.34246	4.25949e-09	-1.2605	2.79212e-10	-1.5321	5.2656e-11	-0.0377885	1	-0.174184	0.434283	0.271601	0.322498	0.926288
AFLA_002100	2.66454e-15	1	-8.88178e-16	1	-0.828812	0.430357	-1.06236	0.340134	1.86846	0.0274128	1.08738	0.276437	3.55271e-15	1	0.23355	0.926883	0.781082	0.712107	0.175861
AFLA_002110	1.77636e-15	1	-1.77636e-15	1	-0.381004	0.653423	-0.497019	0.578514	1.69042	0.00747602	-0.310624	0.71746	3.55271e-15	1	0.116015	0.979881	2.00105	0.0378936	0.296854
AFLA_002120	1.77636e-15	1	-0.987048	0.277619	1.14402	0.113387	0.299314	0.770646	0.390258	0.570821	-1.07274	0.135857	0.987048	0.895966	0.844708	0.334158	1.46299	0.154428	1
AFLA_002130	1.77636e-15	1	-1.77636e-15	1	0.0356933	1	0.416381	0.529042	-0.068148	0.944075	0.391068	0.508803	3.55271e-15	1	-0.380688	0.616018	-0.459216	0.689317	0.351689
AFLA_002140	1.24754	0.169079	2.04938	0.0186435	1.81317	0.0150867	1.67094	0.0363725	2.14204	0.00132063	4.08064	1.03144e-06	-0.801843	0.992317	0.142221	0.96093	-1.9386	0.0563831	1
AFLA_002150	-0.349017	0.920277	1.60327	0.328546	0.543198	0.728268	-0.706368	0.671738	0.784237	0.514254	1.2327	0.352761	-1.95229	0.83785	1.24957	0.439377	-0.448466	0.940351	0.643795
AFLA_002160	0.238468	0.532511	1.09017	0.000741885	0.206385	0.494764	0.278563	0.380541	-0.528867	0.0269769	-0.626359	0.0214378	-0.851704	0.176063	-0.0721779	0.912722	0.0974922	0.938731	0.619724
AFLA_002170	0.883719	0.613166	0.578176	0.787091	1.52499	0.214502	1.6468	0.213739	-1.06392	0.323876	-0.831868	0.523339	0.305543	1	-0.121803	1	-0.232055	1	0.649574
AFLA_002180	-0.51237	0.0178475	-0.670457	0.00214488	-0.0969447	0.660456	-0.0534066	0.869405	0.293648	0.0716118	0.894015	9.39009e-06	0.158088	1	-0.043538	0.931042	-0.600367	0.0145503	0.272163
AFLA_002190	-0.567806	0.12747	-0.273658	0.540076	0.836453	0.00722246	0.66812	0.0445636	0.868441	0.00169614	0.945436	0.00254094	-0.294149	1	0.168332	0.723005	-0.076995	0.987592	0.0791678
AFLA_002200	1.02583	0.00573691	0.912533	0.014391	-0.171366	0.649417	0.627669	0.068263	0.133943	0.678155	0.134884	0.726098	0.113294	1	-0.799035	0.0238833	-0.000941311	1	0.00474761
AFLA_002210	-0.660474	0.0997153	-0.803855	0.0429888	0.944502	0.00531423	1.2179	0.000886545	0.240793	0.442518	0.196501	0.60385	0.143382	1	-0.273397	0.546356	0.0442917	1	0.000507787
AFLA_002220	-0.237976	0.672552	0.0840859	0.959047	-2.50965	1.49743e-08	-2.86908	2.83276e-09	0.989969	0.002435	0.742722	0.0421326	-0.322061	1	0.359432	0.44381	0.247247	0.781809	0.257741
AFLA_002230	-1.61994	0.0108439	-2.08427	0.00121967	-0.626108	0.273401	-0.447988	0.498082	3.52494	3.6542e-09	3.80418	9.96399e-09	0.464334	1	-0.17812	0.870807	-0.27924	0.867059	0.239689
AFLA_002240	1.77636e-15	1	-1.77636e-15	1	0.572189	0.282925	0.572189	0.328146	0	1	-0.974303	0.0554342	3.55271e-15	1	2.66454e-15	1	0.974303	0.192016	4.71638e-06
AFLA_002250	-0.0629291	1	-1.7254	0.205871	0.545591	0.677454	0.641044	0.653671	1.89258	0.048383	0.177017	0.93177	1.66247	0.848493	-0.0954535	1	1.71556	0.315968	0.820342
AFLA_002260	-1.78815	0.178257	-0.998181	0.519685	0.417532	0.764081	1.45638	0.23022	1.09366	0.261744	-0.72008	0.548623	-0.789969	1	-1.03885	0.457737	1.81374	0.274303	0.699189
AFLA_002270	3.23872	6.2915e-07	0.412108	0.578571	-0.687051	0.184147	-0.387556	0.528617	1.55082	0.00066263	1.6424	0.00135752	2.82661	0.0014903	-0.299495	0.689031	-0.0915851	1	2.89886e-06
AFLA_002280	-0.525978	0.560679	0.748691	0.372351	3.55271e-15	1	8.88178e-16	1	0.390258	0.518598	0.390258	0.582146	-1.27467	0.619111	2.66454e-15	1	1.77636e-15	1	0.00629964
AFLA_002290	-1.02402	2.78907e-07	-0.947225	1.22706e-06	-1.62432	4.51856e-13	-1.59416	2.94897e-12	-0.798899	2.55109e-07	-0.585321	0.000222566	-0.0767917	1	-0.0301576	0.957071	-0.213578	0.389162	0.696299
AFLA_002300	-0.13022	0.719526	-0.321446	0.264071	0.107307	0.69599	0.0818237	0.814976	0.934762	1.48002e-05	0.834965	0.000361956	0.191226	1	0.0254829	1	0.0997977	0.901405	0.0184503
AFLA_002310	-0.20555	0.312562	-0.0560322	0.877543	0.228569	0.161153	0.446993	0.00889631	0.451757	0.00153933	0.734662	1.79977e-05	-0.149518	1	-0.218424	0.250539	-0.282904	0.233571	0.0668346
AFLA_002320	-0.324024	0.0819973	-0.0763903	0.787022	-0.197245	0.225474	-0.275348	0.107283	0.219862	0.111366	0.149815	0.364481	-0.247634	0.821962	0.0781021	0.754474	0.0700475	0.899616	0.0187095
AFLA_002330	-0.504978	0.00948699	-0.466907	0.0172379	-0.48088	0.00444464	-0.237878	0.200766	0.361503	0.0139448	0.514787	0.0024057	-0.0380713	1	-0.243002	0.220288	-0.153284	0.649892	1.7592e-08
AFLA_002340	-1.20075	1.21407e-09	-1.17692	1.95467e-09	-1.31582	7.93848e-12	-1.03938	7.04934e-09	-0.459328	0.000280989	-0.595966	4.83822e-05	-0.0238294	1	-0.276441	0.0751389	0.136638	0.605264	0.670121
AFLA_002350	-2.07902	0.0643041	-2.49648	0.0257181	1.98252	0.037842	1.29806	0.222382	2.76207	0.00123726	-0.978302	0.324397	0.417465	1	0.684464	0.605812	3.74037	0.00258516	0.25565
AFLA_002360	-0.133311	0.645954	-0.110143	0.734098	-0.434861	0.0241866	-0.260275	0.22625	-0.107046	0.564143	0.00622396	1	-0.0231681	1	-0.174586	0.489786	-0.11327	0.825216	0.085061
AFLA_002370	-0.408081	0.000226352	-0.388324	0.000430624	0.0992413	0.308629	-0.0897586	0.408809	0.0928934	0.263429	0.0201224	0.88805	-0.0197576	1	0.189	0.0684008	0.072771	0.722202	0.530512
AFLA_002380	1.37354	0.0189188	2.02329	0.000683889	-1.98852	0.000155472	-2.08102	0.000188366	0.59143	0.185357	0.209991	0.730121	-0.649748	0.926246	0.0925014	0.965476	0.381438	0.736403	0.0238443
AFLA_002390	0.226615	0.263292	0.209515	0.313079	0.339194	0.0353616	0.450671	0.00897775	-0.980516	1.22242e-08	-1.14507	6.11679e-09	0.0170994	1	-0.111478	0.622517	0.164551	0.583751	0.267991
AFLA_002400	1.11806	0.00440076	0.284976	0.56291	-1.19085	0.000591064	-0.544312	0.140458	0.934877	0.00189925	0.306803	0.389638	0.833082	0.403605	-0.646535	0.0894997	0.628075	0.206444	0.0101921
AFLA_002410	-0.336295	0.0652857	-0.443028	0.0142892	-0.351252	0.0233438	-0.19613	0.260827	0.415831	0.0025405	0.074067	0.682034	0.106733	1	-0.155122	0.432001	0.341764	0.116323	0.0907364
AFLA_002420	0.43137	0.000182387	0.367782	0.00118353	0.148828	0.128006	-0.0081961	1	0.0544429	0.555914	-0.0819172	0.42534	0.063588	1	0.157025	0.156822	0.13636	0.382449	0.976647
AFLA_002430	0.748542	0.579192	2.6481	0.0157572	1.26406	0.189622	1.13276	0.287367	0.768134	0.371741	-0.445279	0.685078	-1.89956	0.607299	0.131308	0.991291	1.21341	0.440043	0.0607197
AFLA_002440	0.0593263	1	0.194781	0.835716	-0.990459	0.0369574	0.587359	0.273453	1.09653	0.00863568	1.21425	0.0104725	-0.135455	1	-1.57782	0.00278314	-0.117717	0.987592	1
AFLA_002450	0.748057	0.00646566	0.538532	0.0545612	-0.32274	0.183193	0.336098	0.199653	-0.19654	0.362964	-0.702918	0.00320321	0.209524	1	-0.658838	0.0116845	0.506377	0.131214	0.0663475
AFLA_002460	-0.610966	0.502	-8.88178e-16	1	1.5859	0.0164029	1.5859	0.0247906	-0.855016	0.141813	-0.619646	0.372638	-0.610966	1	2.66454e-15	1	-0.23537	0.938963	0.467922
AFLA_002470	0.256726	0.299456	0.195139	0.46922	0.973622	5.12432e-06	0.832412	0.000122332	0.662116	0.00020737	0.67587	0.000698609	0.0615867	1	0.14121	0.60055	-0.0137536	1	0.431267
AFLA_002480	0.229326	0.31445	0.306752	0.161042	-0.241042	0.18871	-0.230043	0.251645	-1.04282	2.9055e-08	-0.45955	0.0101042	-0.0774263	1	-0.0109989	1	-0.583273	0.0130746	0.143634
AFLA_002490	0.0204613	0.99677	0.267376	0.0766772	0.386332	0.00257037	0.235308	0.0858654	0.247617	0.0253464	-0.124575	0.346896	-0.246915	0.642541	0.151023	0.329375	0.372192	0.0273147	0.863282
AFLA_002500	-2.36281	3.40022e-09	-2.4154	2.07116e-09	-2.39555	1.51632e-10	0.469223	0.131796	-0.441353	0.0771757	-0.517308	0.0694573	0.0525923	1	-2.86477	1.29044e-11	0.0759553	0.980277	0.0547772
AFLA_002510	0.50752	0.00149997	0.670022	5.49425e-05	1.24992	1.89413e-11	1.02773	6.38732e-09	0.399965	0.0010807	0.435403	0.00165146	-0.162502	0.950946	0.222193	0.156906	-0.0354384	0.981979	0.00726067
AFLA_002520	-0.175536	0.5477	-0.151227	0.633335	0.679313	0.00128408	0.448582	0.0435621	0.517103	0.00474746	-0.103173	0.667086	-0.0243091	1	0.230731	0.368911	0.620276	0.0241811	1
AFLA_002530	-0.401476	0.043538	-0.351831	0.0830309	0.178918	0.316986	0.0675939	0.785842	-0.65273	4.08361e-05	-0.79842	1.30902e-05	-0.0496442	1	0.111324	0.647398	0.14569	0.682735	0.585703
AFLA_002540	0.624816	0.00820832	0.405256	0.0973113	0.0544225	0.857699	0.476199	0.0290522	1.28055	6.08887e-09	1.58604	8.02002e-10	0.21956	0.991937	-0.421776	0.0639481	-0.305483	0.345384	1
AFLA_002550	0.111601	0.797081	0.131971	0.755248	0.194043	0.472195	0.248152	0.385516	-0.79278	0.000387605	-0.22547	0.384683	-0.0203696	1	-0.054109	0.940325	-0.56731	0.0970219	0.230141
AFLA_002560	-0.344984	0.434721	-0.386499	0.376349	1.23096	0.000317324	0.412208	0.269216	0.134174	0.689959	-0.119902	0.772591	0.0415154	1	0.818755	0.0253125	0.254076	0.730057	0.693504
AFLA_002570	-0.0168088	0.997627	0.15008	0.257974	0.326017	0.00217005	0.182918	0.108736	0.121654	0.19096	-0.0936188	0.399542	-0.166889	0.813491	0.143099	0.251944	0.215273	0.153867	0.237065
AFLA_002580	1.31415	0.022879	2.31108	0.000113851	1.42606	0.00437965	-0.139887	0.872953	1.80401	8.86316e-05	1.14425	0.0207811	-0.996937	0.617102	1.56594	0.00446027	0.659758	0.421481	0.452664
AFLA_002590	2.48457	4.39668e-10	2.1017	1.89745e-08	1.84356	2.13366e-08	1.97004	1.75113e-08	2.09392	7.18553e-11	1.84993	1.83923e-08	0.382875	0.892407	-0.126476	0.779464	0.243992	0.662643	0.000570787
AFLA_002600	-0.808746	0.00251579	-0.566499	0.0357279	-0.596667	0.00954071	-0.285412	0.270667	0.228602	0.265986	0.102256	0.707274	-0.242247	0.995729	-0.311256	0.25526	0.126346	0.84556	0.203892
AFLA_002610	-0.262406	0.249853	-0.161386	0.538396	-0.344831	0.0594399	-0.0713346	0.791104	0.168452	0.305821	0.0472072	0.85518	-0.10102	1	-0.273496	0.201002	0.121245	0.786596	0.0481197
AFLA_002620	0.272432	0.413689	0.404252	0.1948	-1.01711	0.000115321	-0.340466	0.22496	0.270393	0.228386	0.378687	0.135446	-0.131819	1	-0.676641	0.0148147	-0.108295	0.904917	0.00469434
AFLA_002630	1.77636e-15	1	-1.77636e-15	1	3.55271e-15	1	-0.542231	0.115054	0	1	-1.77636e-15	1	3.55271e-15	1	0.542231	0.133214	1.77636e-15	1	2.13458e-05
AFLA_002640	0.71953	0.0685	0.767522	0.0531367	0.652845	0.0518463	0.285833	0.477774	0.671927	0.0218984	1.36506	0.000101106	-0.0479929	1	0.367012	0.379677	-0.693128	0.149772	0.00813219
AFLA_002650	-1.55124	0.310452	0.25509	0.967967	0.304654	0.869104	-1.5033	0.266991	2.11558	0.0437926	1.66345	0.171439	-1.80633	0.853909	1.80795	0.19859	0.452132	0.929843	1
AFLA_002660	1.52262	0.181522	2.49292	0.022338	3.28023	0.000609408	1.09696	0.300981	1.13635	0.168461	0.684557	0.499861	-0.970296	0.997216	2.18327	0.035004	0.451789	0.881602	0.820342
AFLA_002670	-0.391434	0.00350722	-0.355218	0.00820684	0.428123	0.000323258	-0.0493983	0.763887	0.183946	0.0679396	0.0804731	0.523264	-0.0362158	1	0.477522	0.000253453	0.103473	0.657967	0.484713
AFLA_002680	-0.325606	0.0916655	-0.289827	0.142632	-0.473496	0.00386215	-0.320465	0.0671508	0.152516	0.297369	0.218436	0.185384	-0.0357792	1	-0.153031	0.465602	-0.0659203	0.915778	0.179611
AFLA_002690	-0.235714	0.0563712	-0.109256	0.448318	0.260918	0.013284	-0.142346	0.224493	-0.59427	5.54754e-08	-0.669391	5.90811e-08	-0.126458	0.94756	0.403264	0.000631855	0.0751202	0.761898	0.320671
AFLA_002700	-0.00202889	1	0.152344	0.537542	0.669302	0.000183881	-0.116607	0.588402	-0.706202	1.52614e-05	-0.396454	0.0205811	-0.154373	1	0.785909	7.31572e-05	-0.309748	0.224156	0.608962
AFLA_002710	0.126231	0.505277	0.14206	0.45117	0.181171	0.199609	0.324268	0.0274851	0.793893	3.54726e-08	0.901075	3.24117e-08	-0.0158287	1	-0.143097	0.409182	-0.107182	0.724241	3.14704e-06
AFLA_002720	0.232511	0.196939	0.443359	0.00956678	0.0407969	0.849276	0.524376	0.00100643	0.293569	0.0221655	0.331647	0.0232585	-0.210848	0.878425	-0.483579	0.00301913	-0.0380784	0.98208	0.846602
AFLA_002730	0.295857	0.309817	0.121357	0.759134	0.361681	0.118422	0.609344	0.0127481	0.445217	0.026005	0.38083	0.0966504	0.1745	1	-0.247663	0.386247	0.064387	0.973734	0.367397
AFLA_002740	0.336382	0.000245966	0.270542	0.00269215	0.701752	2.13329e-11	0.714509	5.19346e-11	0.425972	8.48689e-08	0.711465	1.42747e-11	0.0658406	1	-0.0127564	0.976815	-0.285493	0.00446314	0.108043
AFLA_002750	0.121837	0.339762	0.195716	0.100243	-0.208443	0.0356237	-0.354184	0.0010154	0.0597225	0.526876	-0.196555	0.0466136	-0.0738783	1	0.145741	0.212002	0.256277	0.0583654	0.636756
AFLA_002760	-0.140223	0.754861	0.0741019	0.930888	-0.603063	0.0256011	-0.49202	0.0927449	-0.903463	0.000252724	-0.839596	0.00213539	-0.214325	1	-0.111042	0.811555	-0.0638671	0.990949	0.00926765
AFLA_002770	-0.00659949	1	0.0832971	0.792659	0.78234	2.87445e-05	0.706141	0.000252212	0.239144	0.119813	-0.0269892	0.936896	-0.0898966	1	0.0761982	0.795547	0.266133	0.336254	0.017307
AFLA_002780	-0.242241	0.15069	-0.226341	0.188601	0.337613	0.0154316	0.41282	0.00570791	0.108819	0.396116	-0.212757	0.129121	-0.0159002	1	-0.0752076	0.725406	0.321576	0.0970219	1.61901e-05
AFLA_002790	-0.270477	0.131805	-0.159591	0.430292	-0.8066	1.35943e-06	-0.621263	0.00016875	0.125188	0.357287	0.0341401	0.8782	-0.110886	1	-0.185337	0.305949	0.0910478	0.813093	0.00180092
AFLA_002800	-0.247023	0.0200323	-0.166635	0.132619	-0.124005	0.185674	-0.261364	0.0075753	-0.541307	2.11176e-08	-0.448706	6.54709e-06	-0.0803872	1	0.137359	0.199557	-0.0926008	0.587704	0.39039
AFLA_002810	-0.0872563	0.541316	0.12324	0.354666	0.430674	6.19141e-05	0.376551	0.000689231	0.148049	0.0970354	0.318867	0.0019667	-0.210497	0.580915	0.054123	0.730995	-0.170819	0.269182	0.506888
AFLA_002820	-0.136722	0.800677	-0.255922	0.56574	2.07248	1.7114e-08	1.04731	0.00152814	-0.715558	0.00772971	0.0692567	0.879868	0.1192	1	1.02517	0.00252484	-0.784815	0.0595649	0.940125
AFLA_002830	-2.14121	2.42869e-09	-2.48573	7.48994e-11	0.686836	0.007237	1.33989	5.63155e-06	1.46236	3.98132e-08	2.00901	5.92787e-10	0.344527	0.909418	-0.653056	0.0202467	-0.546646	0.129843	1
AFLA_002840	-4.61335	5.92961e-08	-5.8764	2.86485e-10	-2.95112	1.68396e-05	-3.27538	8.16256e-06	-4.1048	3.52533e-09	-4.08066	5.19022e-08	1.26304	0.626754	0.324255	0.746174	-0.0241397	1	0.613866
AFLA_002850	-1.35608	0.0109268	-1.96708	0.000325952	1.49375	0.00137949	0.823359	0.098128	-2.32958	4.39298e-07	-0.399893	0.412008	0.611007	0.916753	0.670392	0.215258	-1.92969	0.00126816	0.0524563
AFLA_002860	-2.01476	3.51498e-05	-2.59405	5.19316e-07	0.93178	0.0196775	0.442798	0.334478	-2.95145	1.56264e-10	-1.81074	2.27585e-05	0.579282	0.874232	0.488982	0.314656	-1.14071	0.0329604	0.653178
AFLA_002870	0.324433	0.0894467	0.274451	0.164127	0.0581218	0.782231	0.0330256	0.927959	0.480518	0.000895563	0.36087	0.0243248	0.0499819	1	0.0250962	0.983327	0.119648	0.744218	0.00387865
AFLA_002880	-0.0349027	0.903313	-0.014143	1	-0.352785	0.00255789	-0.209467	0.0943034	-0.0831217	0.439712	0.0719805	0.575358	-0.0207597	1	-0.143318	0.307502	-0.155102	0.414908	0.645512
AFLA_002890	0.768018	6.90903e-06	1.07463	1.20359e-08	0.0676539	0.680792	0.322045	0.0285142	-0.32208	0.00771675	-0.166214	0.237107	-0.306614	0.502812	-0.254391	0.101204	-0.155866	0.52255	2.13271e-05
AFLA_002900	0.791325	0.000421227	0.973707	2.81833e-05	0.303325	0.113705	0.76611	0.000245807	-0.385671	0.019961	0.0466771	0.86509	-0.182383	1	-0.462786	0.0275558	-0.432348	0.101154	0.719761
AFLA_002910	1.11318	0.000415805	0.800114	0.00994419	1.9501	3.33113e-09	1.51367	1.54769e-06	-0.187411	0.45045	0.580316	0.0285287	0.313063	0.95697	0.436434	0.153539	-0.767726	0.0306579	0.408417
AFLA_002920	0.650539	0.631542	0.631486	0.655903	4.861	1.75118e-06	3.10782	0.00163422	2.46246	0.00239718	1.84281	0.0422997	0.0190529	1	1.75318	0.0880253	0.619646	0.778585	0.420584
AFLA_002930	-0.45405	0.705875	-0.695981	0.523441	-1.1778	0.128709	-0.630823	0.493931	-0.68198	0.324396	0.00398141	1	0.241931	1	-0.546977	0.606526	-0.685962	0.65799	0.0965757
AFLA_002940	0.326278	0.483598	0.156273	0.803449	1.54796	2.26407e-05	1.35062	0.000312484	1.45385	8.59937e-06	1.74027	3.46776e-06	0.170005	1	0.197345	0.699801	-0.28642	0.692512	0.68224
AFLA_002950	0.185986	0.944175	-0.197414	0.943537	2.66454e-15	1	-0.495213	0.612867	-0.467345	0.52366	-8.88178e-16	1	0.3834	1	0.495213	0.656041	-0.467345	0.815969	0.95923
AFLA_002960	-0.541628	0.236793	-0.0906137	0.949409	-0.576625	0.121665	-0.802449	0.0418188	-0.0237758	0.998493	-0.21151	0.610147	-0.451015	0.942711	0.225825	0.674943	0.187735	0.867037	0.317364
AFLA_002970	0.123584	0.641081	0.424684	0.0416697	0.889605	4.56673e-06	0.916075	7.25164e-06	0.557888	0.000497489	0.652554	0.000347564	-0.301101	0.759834	-0.0264699	0.985598	-0.0946657	0.854334	0.617086
AFLA_002980	1.22743	6.97407e-07	1.25716	4.53127e-07	0.887218	1.80166e-05	1.366	2.19069e-08	1.4185	1.60377e-10	0.387637	0.0429081	-0.0297309	1	-0.478784	0.024498	1.03086	4.82216e-05	0.198234
AFLA_002990	-0.432761	0.00222199	-0.248486	0.0862959	-0.159302	0.200887	0.250022	0.0548742	-0.160493	0.132198	0.301625	0.012601	-0.184275	0.846316	-0.409324	0.00237574	-0.462118	0.00339297	0.189852
AFLA_003000	0.196128	0.947111	-0.157526	0.981355	-1.90552	0.021872	-1.69811	0.0574866	-1.36201	0.0611493	-1.24731	0.136443	0.353654	1	-0.20741	0.921851	-0.114694	1	0.176625
AFLA_003010	0.2048	0.997627	1.02867	0.586221	1.19117	0.385614	1.46877	0.314611	2.96525	0.00841972	3.37326	0.00840306	-0.823869	1	-0.277607	0.942574	-0.408007	0.955184	0.583687
AFLA_003020	-0.601457	0.00151413	-0.651286	0.000670171	-0.366106	0.0236197	-0.489823	0.00478432	-1.2212	9.40685e-11	-0.97432	1.77375e-07	0.0498293	1	0.123716	0.575745	-0.246879	0.333504	0.317173
AFLA_003030	-0.149033	0.987714	0.461934	0.750664	1.39734	0.103017	1.36388	0.141495	0.782576	0.306392	-1.09087	0.206303	-0.610966	1	0.0334606	1	1.87345	0.115272	0.791503
AFLA_003040	0.83052	1.04753e-05	0.622922	0.000558101	0.181659	0.25117	-0.266784	0.10704	0.527579	0.00016357	0.50668	0.00108598	0.207598	0.90383	0.448443	0.00773629	0.0208995	1	0.307014
AFLA_003050	-0.443962	0.703417	-2.19105	0.0113235	-2.07437	0.00543774	-2.05751	0.00952263	-0.987988	0.129929	-0.767642	0.318979	1.74709	0.445933	-0.0168534	1	-0.220345	0.967042	0.139134
AFLA_003060	-0.326871	0.314471	-0.723116	0.0150536	-0.659244	0.00989049	0.0210211	1	0.639882	0.00450867	0.167794	0.551027	0.396246	0.829207	-0.680266	0.0156169	0.472088	0.207759	0.946975
AFLA_003070	0.339309	0.711721	0.21897	0.858327	-1.22745	0.0342987	-0.786748	0.223545	0.93788	0.0645852	0.90086	0.122498	0.120339	1	-0.440701	0.57888	0.0370194	1	0.331656
AFLA_003080	-2.42141	4.71037e-05	-2.57947	1.94633e-05	-2.83258	4.12679e-07	-1.92797	0.00034324	0.209497	0.671304	0.0795972	0.931165	0.158067	1	-0.904611	0.102514	0.1299	0.980298	1
AFLA_003090	0.137793	0.881694	-0.103526	0.947442	0.850959	0.0397383	0.768575	0.085935	2.27189	9.87597e-08	2.26146	1.06401e-06	0.241319	1	0.0823836	0.955496	0.0104295	1	0.71682
AFLA_003100	0.4619	0.760375	0.4619	0.772178	0.827655	0.396152	1.66481	0.0896562	0.554927	0.519361	1.17116	0.204033	3.55271e-15	1	-0.837152	0.476946	-0.616238	0.778521	0.12581
AFLA_003110	-1.5627	4.14296e-06	-1.90224	1.132e-07	1.27598	1.31121e-05	1.96514	1.42163e-08	-2.79615	3.39467e-14	-2.59674	5.77113e-12	0.339543	0.939199	-0.689163	0.0214193	-0.199409	0.748838	0.840246
AFLA_003120	-2.39296	0.00146175	-1.86117	0.0128781	-0.918769	0.160974	-0.0549167	1	1.00133	0.0746357	0.488804	0.481057	-0.531787	1	-0.863853	0.259312	0.512526	0.71605	0.0939226
AFLA_003130	-3.43948	8.76482e-05	-1.85993	0.0293971	-1.15813	0.116039	-1.06607	0.18449	0.203224	0.802938	0.612026	0.430927	-1.57955	0.530465	-0.0920636	0.999642	-0.408802	0.84065	0.258278
AFLA_003140	-0.841862	0.590386	-0.142511	1	-0.280532	0.864352	0.380774	0.821709	-1.65546	0.0808412	-2.08971	0.052818	-0.69935	1	-0.661306	0.677114	0.434253	0.917868	1
AFLA_003150	-0.156085	0.501362	-0.548493	0.00534659	-1.16524	1.17619e-08	-0.753932	6.62647e-05	0.336576	0.0224333	0.450668	0.00756555	0.392408	0.46123	-0.411313	0.027659	-0.114091	0.780249	0.231623
AFLA_003160	1.79638	0.182393	1.13043	0.455473	-0.550689	0.675814	-0.903467	0.496632	1.32576	0.174467	0.550805	0.665689	0.665952	1	0.352779	0.874447	0.774957	0.766377	0.176625
AFLA_003170	-1.70335	0.0117873	-0.649843	0.405334	-4.51266	9.91114e-10	-3.72667	1.75961e-07	-2.14518	7.39385e-05	-1.74513	0.00299492	-1.05351	0.70818	-0.78599	0.258544	-0.400055	0.775555	0.00229736
AFLA_003180	1.77636e-15	1	-1.77636e-15	1	0.572189	0.444404	0.110718	0.958606	-0.459216	0.476277	-1.811	0.00840306	3.55271e-15	1	0.461471	0.636413	1.35178	0.174782	1
AFLA_003190	1.77636e-15	1	-1.77636e-15	1	3.55271e-15	1	8.88178e-16	1	0	1	-0.619646	0.0262621	3.55271e-15	1	2.66454e-15	1	0.619646	0.114625	0.00461085
AFLA_003200	0.217774	0.506523	0.263833	0.408296	-1.63869	1.23984e-08	-1.24258	6.23399e-06	-0.377326	0.0695878	-0.361771	0.130544	-0.0460591	1	-0.396111	0.1463	-0.015555	1	0.372968
AFLA_003210	1.77636e-15	1	-1.77636e-15	1	0.143336	0.93788	0.25823	0.858962	0.582297	0.468658	2.35586	0.00612406	3.55271e-15	1	-0.114894	0.994963	-1.77356	0.149772	1
AFLA_003220	0.682909	7.33695e-07	0.568387	1.76132e-05	-0.240826	0.0247574	-0.270101	0.018566	-0.627019	2.80815e-08	-0.522213	7.57592e-06	0.114522	0.993916	0.0292747	0.906287	-0.104806	0.610022	0.140139
AFLA_003230	-0.0563292	0.696735	0.153929	0.176714	0.0537478	0.617578	-0.394765	0.000124559	0.481072	2.81418e-07	0.499977	1.31166e-06	-0.210259	0.485742	0.448512	3.36118e-05	-0.0189051	1	1
AFLA_003240	-2.47011	0.00340297	-2.56951	0.00245715	2.23069	0.0023574	0.354902	0.719536	0	1	-1.45877	0.0430412	0.0993946	1	1.87579	0.0188758	1.45877	0.162679	0.00552673
AFLA_003250	0.241514	0.482496	0.307829	0.348885	0.632473	0.0121943	1.0796	0.00011646	2.09987	8.2984e-12	1.6867	2.08153e-08	-0.0663145	1	-0.447126	0.117735	0.413169	0.284419	0.667666
AFLA_003260	-0.0306295	0.878073	-0.0517645	0.732775	0.266348	0.00348946	0.251687	0.00922785	-0.271589	0.00083729	0.00580101	1	0.021135	1	0.0146616	0.979484	-0.27739	0.0206103	0.663003
AFLA_003270	0.387223	0.0565771	0.336527	0.105441	0.125916	0.512736	0.182925	0.359837	-0.34388	0.0229354	-0.0830875	0.680115	0.0506958	1	-0.0570089	0.867104	-0.260793	0.341441	0.165934
AFLA_003280	-0.358479	0.000655107	-0.357376	0.000695919	-0.0357998	0.749303	-0.155556	0.108352	-0.254182	0.00142426	-0.298785	0.00100338	-0.00110374	1	0.119756	0.260495	0.0446029	0.871649	0.458064
AFLA_003290	-0.570184	0.585914	-1.0777	0.237336	-0.996734	0.179713	-0.595924	0.496062	-1.37225	0.0305453	-0.214104	0.826458	0.507512	1	-0.400811	0.716503	-1.15815	0.304345	0.358159
AFLA_003300	2.66454e-15	1	-8.88178e-16	1	-1.46646	0.129629	-0.450496	0.731251	-2.49995	0.00313169	-4.01027	6.60885e-05	3.55271e-15	1	-1.01597	0.395583	1.51032	0.308966	1
AFLA_003310	1.77636e-15	1	-1.77636e-15	1	3.55271e-15	1	8.88178e-16	1	0	1	-1.77636e-15	1	3.55271e-15	1	2.66454e-15	1	1.77636e-15	1	1
AFLA_003320	1.77636e-15	1	-1.77636e-15	1	3.55271e-15	1	8.88178e-16	1	0	1	-1.77636e-15	1	3.55271e-15	1	2.66454e-15	1	1.77636e-15	1	1
AFLA_003330	-1.80281	0.152754	-0.063007	1	-3.98131	0.00023127	-1.4179	0.221686	-1.96628	0.0308158	-1.00432	0.357637	-1.7398	0.777463	-2.56341	0.0262643	-0.96196	0.644154	1
AFLA_003340	0.680209	0.044458	0.953422	0.00475943	0.386816	0.192423	0.517546	0.0987449	1.77237	1.03524e-08	2.09304	4.04006e-09	-0.273213	1	-0.13073	0.783507	-0.320668	0.537287	0.0167102
AFLA_003350	1.77636e-15	1	-1.77636e-15	1	0.571832	0.524924	0.571832	0.565719	1.98494	0.00519179	2.68774	0.00103411	3.55271e-15	1	2.66454e-15	1	-0.702797	0.671567	0.000269724
AFLA_003360	-0.651936	0.19956	-1.16406	0.0159408	-1.7861	4.71154e-05	-0.41552	0.388209	1.22414	0.000982869	0.976936	0.0177947	0.51212	0.941629	-1.37058	0.00285428	0.247206	0.819769	0.757678
AFLA_003370	2.66454e-15	1	-8.88178e-16	1	1.93674	0.0262195	2.43507	0.00902268	9.19977	1.88346e-14	10.7599	8.25769e-15	3.55271e-15	1	-0.498329	0.704755	-1.56013	0.227985	0.820342
AFLA_003380	-0.0451692	1	0.243761	0.743622	-1.01505	0.0203655	-1.30048	0.00560814	2.28143	2.70245e-07	1.23268	0.00504243	-0.288931	1	0.285429	0.649916	1.04875	0.0844503	0.820342
AFLA_003390	-0.0389104	0.977136	0.125762	0.702762	-0.318387	0.120188	0.149382	0.547433	1.37941	9.90873e-10	1.28333	6.30246e-08	-0.164673	1	-0.46777	0.0374086	0.0960841	0.886373	8.40674e-09
AFLA_003400	0.352265	0.0154391	0.488644	0.000936662	0.512636	9.72221e-05	0.509509	0.000228242	1.34141	1.26903e-14	1.50921	1.58944e-14	-0.13638	0.987666	0.00312692	1	-0.167802	0.416008	0.661817
AFLA_003410	-0.202433	0.385908	-0.0931511	0.764356	0.422204	0.0179376	0.355511	0.0641455	0.164721	0.306069	0.0765442	0.720526	-0.109282	1	0.0666935	0.83756	0.0881763	0.876054	0.00380353
AFLA_003420	-0.0349624	0.930218	-0.05905	0.815072	-0.739601	9.6681e-07	-0.650195	2.06121e-05	-0.298109	0.0113117	-0.444434	0.00112906	0.0240876	1	-0.0894068	0.639573	0.146324	0.548426	0.305377
AFLA_003430	-0.212055	0.653624	0.115932	0.863112	-0.690805	0.0269772	-0.102168	0.83976	0.285188	0.312329	0.287628	0.382881	-0.327987	0.997216	-0.588637	0.0952802	-0.0024404	1	0.0010035
AFLA_003440	-0.385222	0.0652462	-0.232092	0.309927	0.0676599	0.766273	-0.0803148	0.745491	0.321325	0.0383614	0.0761271	0.720596	-0.153131	1	0.147975	0.533146	0.245198	0.397738	0.246602
AFLA_003450	-0.347927	0.0246462	-0.362119	0.0199514	-1.25245	9.7972e-12	-0.781368	8.74202e-07	-0.914864	8.24938e-10	-1.56013	3.3254e-14	0.0141921	1	-0.471086	0.00151524	0.64527	0.000212269	0.0781488
AFLA_003460	0.059991	0.851397	-0.130537	0.577417	-0.445679	0.00542963	-0.364216	0.0327308	-0.721153	3.27667e-06	-0.690391	4.32281e-05	0.190528	0.949892	-0.0814627	0.744794	-0.0307624	1	0.614701
AFLA_003470	0.169695	0.666569	0.208805	0.582667	1.31118	3.84513e-06	0.86021	0.00200713	0.693571	0.00248848	0.273863	0.305271	-0.0391098	1	0.450965	0.124321	0.419708	0.291027	0.000139326
AFLA_003480	-0.223195	0.554307	-0.174639	0.680361	1.05467	0.000151913	0.317779	0.293638	0.474985	0.0415155	0.103444	0.752475	-0.0485568	1	0.736887	0.0122923	0.371541	0.391818	0.0433685
AFLA_003490	-0.100208	0.806497	-0.168896	0.626042	0.774813	0.000889394	0.576903	0.0179825	0.138555	0.523164	0.344969	0.133182	0.068688	1	0.197909	0.511662	-0.206415	0.654786	0.00785349
AFLA_003500	0.390775	0.112187	-0.0328218	1	-1.12318	1.16087e-06	-0.828821	0.000257082	-0.263764	0.145785	-0.267787	0.200644	0.423596	0.585718	-0.294358	0.226538	0.00402276	1	0.0108091
AFLA_003510	0.197425	0.391238	0.314583	0.140751	-0.115416	0.563179	0.880128	1.23135e-05	0.671552	4.34314e-05	0.613248	0.000648245	-0.117157	1	-0.995544	2.79503e-06	0.0583034	0.949508	0.820342
AFLA_003520	-0.347239	0.905851	-0.802654	0.658248	1.45123	0.229043	1.3674	0.302596	-0.936535	0.381096	-0.921041	0.462132	0.455415	1	0.0838277	1	-0.0154946	1	4.70388e-05
AFLA_003530	0.228734	0.750047	0.25038	0.730959	0.443241	0.33493	0.377264	0.468754	0.54099	0.159049	0.508043	0.255301	-0.0216463	1	0.0659765	0.984789	0.0329465	1	0.000134228
AFLA_003540	-0.415119	0.214852	-0.432633	0.197792	-0.556537	0.0399972	-0.781496	0.00708714	0.228313	0.3554	-0.122068	0.703442	0.0175139	1	0.224959	0.53468	0.350381	0.439164	0.347253
AFLA_003550	-0.0223486	1	-0.121992	0.689122	0.191606	0.340946	0.0159613	1	0.464862	0.00558993	0.415916	0.027946	0.0996434	1	0.175645	0.476819	0.048946	0.983145	0.0968376
AFLA_003560	1.77636e-15	1	-1.77636e-15	1	3.55271e-15	1	8.88178e-16	1	0	1	-1.77636e-15	1	3.55271e-15	1	2.66454e-15	1	1.77636e-15	1	1
AFLA_003570	1.77636e-15	1	-1.77636e-15	1	3.55271e-15	1	-0.497019	0.115109	0	1	-1.77636e-15	1	3.55271e-15	1	0.497019	0.133214	1.77636e-15	1	0.670121
AFLA_003580	1.77636e-15	1	-1.77636e-15	1	3.55271e-15	1	8.88178e-16	1	0.391068	0.11117	0.391068	0.167251	3.55271e-15	1	2.66454e-15	1	1.77636e-15	1	0.216531
AFLA_003590	-0.356503	0.346581	-0.0589735	0.974419	-0.0452568	0.948418	0.652973	0.0380409	1.29636	4.96604e-06	0.990487	0.000940146	-0.297529	1	-0.69823	0.0320453	0.305874	0.57272	0.176625
AFLA_003600	0.303201	0.833196	-1.3572	0.139482	-0.381004	0.672624	0	1	0.724008	0.286435	0.724008	0.361107	1.6604	0.516076	-0.381004	0.749522	1.77636e-15	1	0.251926
AFLA_003610	-0.830919	0.673137	-0.236637	0.984008	0.89384	0.535772	1.1327	0.460276	-1.35333	0.2383	-2.7745	0.0301349	-0.594282	1	-0.238862	0.964506	1.42116	0.539457	0.819746
AFLA_003620	-0.521804	0.777374	-1.67629	0.21065	1.79661	0.0979405	1.95477	0.0933773	-2.02856	0.0310116	-2.62707	0.0143052	1.15449	0.992317	-0.158156	0.98685	0.598513	0.843505	0.0420796
AFLA_003630	-0.527539	0.0525608	-0.309785	0.297954	-0.108687	0.698843	0.247046	0.356408	0.441523	0.029469	0.345285	0.139833	-0.217754	1	-0.355732	0.188419	0.0962388	0.911626	0.808112
AFLA_003640	-0.745338	0.000763597	-0.523316	0.0170597	-1.02995	1.07168e-06	-1.10048	9.07072e-07	-1.14073	1.2591e-08	-1.2607	2.00744e-08	-0.222021	0.95421	0.0705226	0.836407	0.119976	0.800376	0.542079
AFLA_003650	-0.990847	9.05371e-08	-1.01905	5.26107e-08	-0.526956	0.000272032	-0.72049	7.81308e-06	-0.941754	1.2837e-09	-0.889633	5.86873e-08	0.0282068	1	0.193534	0.243496	-0.0521215	0.931546	0.608233
AFLA_003660	-0.771858	0.000512988	-0.868123	0.000125235	-0.841886	2.78269e-05	-0.676471	0.000933177	-0.962408	3.71322e-07	-1.10399	2.83171e-07	0.0962644	1	-0.165414	0.504498	0.141577	0.739239	1.76555e-06
AFLA_003670	-0.314953	0.132195	-0.281107	0.190804	-0.104073	0.604495	-0.250925	0.191611	-0.145456	0.359001	-0.191734	0.284963	-0.0338452	1	0.146852	0.525768	0.0462781	0.980277	0.0018583
AFLA_003680	2.66454e-15	1	-1.3158	0.237742	0.640541	0.517025	1.9476	0.0404714	-1.51093	0.0512296	-1.5409	0.0821969	1.3158	0.862988	-1.30706	0.210396	0.0299776	1	0.736738
AFLA_003690	-0.350438	0.0617952	-0.275208	0.15858	-0.252864	0.117629	-0.369307	0.0306308	-0.154204	0.281859	-0.214636	0.185074	-0.0752303	1	0.116443	0.598456	0.060432	0.929025	0.00060115
AFLA_003700	-1.54336	7.35531e-08	-1.18355	9.80877e-06	0.611067	0.00483387	0.398819	0.0869651	-3.045	5.89586e-18	-3.90007	1.97548e-19	-0.359808	0.777463	0.212248	0.44014	0.855068	0.00228283	8.82527e-05
AFLA_003710	2.14826	0.000733498	2.00633	0.00154312	1.95248	0.000440952	2.45502	5.1867e-05	1.19377	0.0116698	-0.879925	0.10389	0.141935	1	-0.502532	0.471923	2.0737	0.00315141	0.150671
AFLA_003720	-2.3548	1.03276e-06	-1.59185	0.000390433	1.17593	0.00209736	1.84999	1.71727e-05	-0.140579	0.719181	-1.2268	0.00135965	-0.762946	0.607264	-0.674063	0.115361	1.08622	0.0308472	0.675851
AFLA_003730	-0.214265	0.369918	-0.302933	0.180746	0.424331	0.0207273	0.388222	0.048862	-0.0183331	0.96578	0.515204	0.00517376	0.0886679	1	0.0361095	0.957417	-0.533537	0.029337	0.844346
AFLA_003740	0.0819669	0.799978	-0.55866	0.00854891	-1.49511	2.58503e-10	-1.18337	1.28614e-07	-1.34448	1.55946e-10	-1.63873	2.70757e-11	0.640627	0.0986636	-0.31174	0.133433	0.294258	0.295969	0.398813
AFLA_003750	-0.663702	0.496945	-8.88178e-16	1	2.66454e-15	1	0	1	-0.42723	0.527942	-0.955452	0.18559	-0.663702	1	2.66454e-15	1	0.528222	0.744657	0.859293
AFLA_003760	-0.824225	0.00236375	-1.20907	2.32175e-05	-0.918158	0.000152956	-0.81296	0.00125034	-0.324118	0.111922	-0.569115	0.0140061	0.384842	0.784852	-0.105198	0.783353	0.244997	0.566337	1.32057e-07
AFLA_003770	-0.983268	0.0308481	-0.864315	0.0623437	1.53634	0.000163797	0.821007	0.050438	-0.411868	0.237845	-0.595704	0.129963	-0.118953	1	0.715332	0.105823	0.183836	0.888299	0.0244353
AFLA_003780	0.0472518	1	-0.594104	0.353185	0.466955	0.371598	0.648334	0.235472	1.62213	0.000278254	1.41458	0.00404755	0.641356	0.918211	-0.181379	0.839018	0.207545	0.907957	0.166913
AFLA_003790	1.5734	0.157209	1.40549	0.220015	1.59049	0.0851593	0.366267	0.784825	-1.66985	0.0374337	-0.167656	0.91521	0.167911	1	1.22422	0.264284	-1.5022	0.286549	1
AFLA_003800	1.77636e-15	1	-1.77636e-15	1	3.55271e-15	1	8.88178e-16	1	0	1	-1.77636e-15	1	3.55271e-15	1	2.66454e-15	1	1.77636e-15	1	0.907063
AFLA_003810	-0.823628	0.00260827	-1.49655	7.19252e-07	-5.53724	6.00604e-23	-6.22032	1.2976e-23	-4.74584	1.92783e-22	-3.81963	4.54045e-18	0.672922	0.247429	0.683086	0.0084623	-0.926211	0.00242906	0.645512
AFLA_003820	-1.65154	0.00207937	-1.23309	0.0216933	-3.21671	8.86896e-09	-2.89046	2.37017e-07	-4.27979	4.91274e-13	-3.64274	5.18631e-10	-0.418455	1	-0.326251	0.60977	-0.637055	0.39496	0.585301
AFLA_003830	-1.21401	0.476939	-1.39531	0.406031	0.129182	0.988007	-0.507539	0.780555	0.825671	0.483501	-0.380707	0.819809	0.181296	1	0.636721	0.746776	1.20638	0.61874	0.820342
AFLA_003840	-0.834831	0.557464	-0.364381	0.868562	0.268559	0.857307	-0.237279	0.906268	3.14569	0.00053459	1.18256	0.250792	-0.47045	1	0.505838	0.749613	1.96313	0.177226	1
AFLA_003850	0.69595	0.694751	1.72876	0.224337	-0.964257	0.435191	0.558111	0.719123	-0.121852	0.959915	-0.604082	0.642445	-1.03281	1	-1.52237	0.262827	0.48223	0.907984	3.03075e-10
AFLA_003860	0.34202	0.830944	1.21359	0.256387	-4.47184	2.01705e-06	-3.91023	4.15139e-05	-0.461039	0.571919	0.695121	0.442794	-0.871574	0.997216	-0.561616	0.641543	-1.15616	0.403314	1
AFLA_003870	-0.375186	0.0499764	-0.36021	0.0629419	-0.630951	0.000202199	-0.366738	0.0359481	-0.480076	0.00104537	-0.389576	0.0166529	-0.0149765	1	-0.264214	0.159756	-0.0904998	0.844238	0.137979
AFLA_003880	0.0537346	0.937179	0.00478136	1	0.528242	0.0137043	0.460516	0.0448252	-0.54363	0.00408227	-0.40436	0.0579874	0.0489533	1	0.0677264	0.876486	-0.13927	0.794055	0.120573
AFLA_003890	-0.462734	0.0141762	-0.351113	0.069265	0.333398	0.0401962	0.126586	0.521543	-0.464261	0.00140064	-0.544764	0.00100348	-0.111621	1	0.206812	0.291616	0.0805034	0.875458	0.490988
AFLA_003900	-0.615874	0.057579	-0.46642	0.168473	-0.939231	0.000870322	-0.401674	0.187676	0.562328	0.0198329	0.339022	0.229484	-0.149454	1	-0.537557	0.0831313	0.223307	0.710526	0.996081
AFLA_003910	-0.113092	0.611258	0.0742374	0.785474	-0.159547	0.31806	0.206049	0.223282	0.244673	0.0655073	-0.0549063	0.773528	-0.18733	0.941635	-0.365596	0.029873	0.299579	0.17356	0.00698877
AFLA_003920	0.207659	0.29744	0.205778	0.30895	0.883532	6.78439e-07	0.86826	2.50881e-06	0.293527	0.0326014	0.00223809	1	0.00188043	1	0.0152725	1	0.291289	0.207485	0.744389
AFLA_003930	-0.422183	0.0286933	-0.616485	0.00153466	0.161519	0.359651	-0.0399438	0.903246	0.743579	3.7784e-06	0.562903	0.000869311	0.194302	0.957051	0.201463	0.318009	0.180676	0.548582	0.421723
AFLA_003940	1.77636e-15	1	-1.77636e-15	1	3.55271e-15	1	8.88178e-16	1	-1.18561	0.0330017	0.898478	0.162788	3.55271e-15	1	2.66454e-15	1	-2.08409	0.012626	1
AFLA_003950	0.403857	0.281247	0.2422	0.578571	1.63508	9.74334e-07	1.29791	8.85683e-05	1.46626	7.10626e-07	1.89149	5.6955e-08	0.161657	1	0.337172	0.357738	-0.425226	0.375297	0.278175
AFLA_003960	-1.01679	0.147095	-0.66637	0.387535	-2.54683	3.7203e-05	-3.09587	4.49214e-06	-5.646	1.60191e-13	-5.41793	1.10725e-11	-0.350419	1	0.549038	0.462627	-0.22807	0.922635	1
AFLA_003970	1.77636e-15	1	-1.77636e-15	1	3.55271e-15	1	8.88178e-16	1	-2.38662	2.9468e-06	-1.45687	0.00557283	3.55271e-15	1	2.66454e-15	1	-0.929753	0.23264	1
AFLA_003980	0.201483	0.374649	-0.159925	0.518863	-1.23458	6.83841e-09	-1.52252	2.12423e-10	-2.03937	1.14619e-15	-1.69621	3.88749e-12	0.361408	0.577781	0.287947	0.149714	-0.343163	0.173754	0.670121
AFLA_003990	-2.66233	1.94418e-08	-3.04627	1.01244e-09	-2.23713	5.36053e-08	-2.19936	2.26139e-07	-0.258479	0.42359	-0.00342303	1	0.383939	0.985447	-0.0377759	1	-0.255056	0.751923	1
AFLA_004000	1.77636e-15	1	-1.77636e-15	1	3.55271e-15	1	8.88178e-16	1	0	1	-1.77636e-15	1	3.55271e-15	1	2.66454e-15	1	1.77636e-15	1	1
AFLA_004010	-0.748398	0.504879	0.517833	0.69287	-1.38452	0.0916082	-0.149316	0.943326	1.15416	0.106357	1.11451	0.176662	-1.26623	0.82865	-1.23521	0.194052	0.0396491	1	0.176625
AFLA_004020	0.283917	0.0878204	0.283484	0.0912574	0.272017	0.0527424	0.298053	0.0476003	0.335066	0.0066705	0.171707	0.230829	0.000432671	1	-0.0260367	0.96451	0.16336	0.504862	0.00420224
AFLA_004030	0.388723	0.106766	0.452472	0.0584189	0.894436	3.23644e-05	1.02543	9.83687e-06	1.30889	3.02935e-09	1.25036	1.00592e-07	-0.0637494	1	-0.130994	0.651516	0.0585338	0.971281	0.798926
AFLA_004040	-0.22628	0.302299	-0.150006	0.548127	0.426222	0.0136921	0.421315	0.0224055	0.445125	0.00359964	0.121437	0.520064	-0.0762742	1	0.00490635	1	0.323688	0.201562	1
AFLA_004050	-0.613602	0.00327661	-0.622587	0.00299325	-0.396688	0.0268196	-0.0300739	0.954358	0.418889	0.00791426	0.314741	0.0789329	0.00898557	1	-0.366614	0.0674164	0.104148	0.829032	0.245005
AFLA_004060	-0.225385	0.0936591	-0.168424	0.235654	0.467721	8.45673e-05	0.373513	0.00220433	-0.0255417	0.853166	-0.154913	0.176471	-0.0569614	1	0.0942083	0.533354	0.129371	0.516645	0.421433
AFLA_004070	0.73799	0.00273202	0.58303	0.0182551	0.619133	0.00367529	0.171265	0.502626	0.809442	4.25407e-05	0.91916	4.10531e-05	0.15496	1	0.447868	0.0572345	-0.109718	0.862958	0.209509
AFLA_004080	0.0889443	0.849219	0.332716	0.262833	-0.66686	0.00473297	-0.697385	0.0055438	-0.755506	0.000391325	-1.07235	1.96909e-05	-0.243772	0.997216	0.0305245	0.997342	0.31684	0.410328	0.0430357
AFLA_004090	0.381213	0.173381	0.381594	0.177479	1.25588	1.1317e-06	1.4942	1.26829e-07	-0.707111	0.000650874	-0.568929	0.0130542	-0.000380851	1	-0.238321	0.411711	-0.138182	0.818329	0.0699851
AFLA_004100	-4.52748	4.49342e-17	-5.27769	5.75191e-19	-1.14035	6.23537e-05	-1.62007	5.7347e-07	-0.0584711	0.861795	-0.0716082	0.849765	0.750217	0.278245	0.479719	0.116955	0.0131371	1	0.213872
AFLA_004110	-1.03965	0.317512	-2.46811	0.0094176	-2.0154	0.0135916	-2.59993	0.00304052	-1.77838	0.012828	-1.24308	0.129705	1.42846	0.735768	0.584534	0.605631	-0.535307	0.790413	1
AFLA_004120	1.77636e-15	1	-1.77636e-15	1	-0.380688	0.654798	8.88178e-16	1	-3.63642	4.84518e-07	-4.99757	1.01346e-08	3.55271e-15	1	-0.380688	0.733854	1.36115	0.19802	0.18017
AFLA_004130	1.77636e-15	1	-1.77636e-15	1	3.55271e-15	1	8.88178e-16	1	0	1	-1.77636e-15	1	3.55271e-15	1	2.66454e-15	1	1.77636e-15	1	0.00776331
AFLA_004140	-0.096274	1	0.848106	0.427875	1.89033	0.0166453	2.07966	0.0137534	-4.24714	1.46552e-07	-4.26498	1.31166e-06	-0.94438	0.949699	-0.18933	0.927438	0.0178352	1	1
AFLA_004150	-0.168504	0.925705	-1.09472	0.154267	-0.227962	0.781069	-0.56436	0.450093	0.0907559	0.927518	1.5744	0.0121472	0.926214	0.867554	0.336398	0.729073	-1.48365	0.089102	0.833312
AFLA_004160	-4.79485	3.34565e-06	-4.32942	1.88615e-05	-2.23444	0.00675058	-2.91351	0.0010816	-0.944151	0.194852	-1.62516	0.0468063	-0.465433	1	0.679065	0.536146	0.681013	0.698552	0.0488447
AFLA_004170	-1.29137	0.00332072	-0.769942	0.0884998	-0.438741	0.264883	-1.01988	0.0116033	-1.59668	9.93845e-06	-1.72865	1.94896e-05	-0.521432	0.895966	0.58114	0.186479	0.131965	0.941969	0.832062
AFLA_004180	-0.265797	0.267907	0.0141972	1	0.167221	0.417427	-0.0148552	1	0.871722	2.81934e-06	0.747806	0.000166325	-0.279994	0.869005	0.182076	0.458013	0.123916	0.79532	4.98709e-06
AFLA_004190	-0.370508	0.315034	-0.807735	0.0167717	3.44497	2.20269e-14	1.8496	1.74896e-07	2.88158	8.56581e-14	3.55333	9.28834e-15	0.437227	0.849616	1.59537	4.63381e-06	-0.671759	0.0944425	0.746666
AFLA_004200	-1.62976	4.36327e-09	-1.66521	2.69147e-09	-0.450541	0.0234532	-1.09415	2.74057e-06	-0.364243	0.0362777	-0.403801	0.0414064	0.0354506	1	0.643604	0.00357475	0.0395573	1	0.0813589
AFLA_004210	0.0226942	1	-0.279322	0.381503	-0.606155	0.0120468	-0.48661	0.0603264	-3.06488	1.12279e-16	-4.37436	1.8365e-19	0.302017	0.938916	-0.119545	0.754485	1.30949	3.94333e-05	0.0855951
AFLA_004220	0.362341	0.0897826	0.461321	0.0288989	-0.111139	0.59068	0.196713	0.341656	-0.418633	0.00817963	-0.627737	0.000655886	-0.0989792	1	-0.307853	0.133591	0.209104	0.507044	0.820342
AFLA_004230	1.77636e-15	1	-1.77636e-15	1	3.55271e-15	1	8.88178e-16	1	0.334343	0.315324	-0.286649	0.469992	3.55271e-15	1	2.66454e-15	1	0.620991	0.266513	1
AFLA_004240	-0.947335	0.0041135	-1.21972	0.000313928	-2.86003	1.72023e-12	-2.2778	1.56599e-09	-2.47638	2.68548e-12	-2.27561	4.10246e-10	0.272386	1	-0.58223	0.0665666	-0.200766	0.763947	0.752328
AFLA_004250	-0.678477	0.227097	-0.298654	0.677599	-2.48023	1.0913e-06	-1.52935	0.0017869	-0.687956	0.0828985	-0.858193	0.0573392	-0.379823	1	-0.950875	0.0597804	0.170237	0.929843	0.820342
AFLA_004260	-2.15572	0.0764546	-3.64828	0.00248922	-5.10573	5.81473e-06	-4.99594	2.04518e-05	-0.12115	0.950561	-0.890712	0.415676	1.49256	0.874232	-0.109795	1	0.769562	0.742212	1
AFLA_004270	-0.94419	0.0574485	-1.63088	0.00106169	-0.774248	0.068158	-0.991254	0.0285436	0.321558	0.410145	0.266549	0.570217	0.686694	0.797417	0.217005	0.743893	0.055009	1	0.833312
AFLA_004280	0.238991	0.891728	-0.289252	0.853883	0.00934106	1	0.807441	0.352007	1.63534	0.0130865	0.569673	0.483823	0.528243	1	-0.7981	0.39768	1.06566	0.38187	0.329106
AFLA_004290	-0.997752	1.13093e-07	-1.21981	1.54876e-09	-2.86215	7.81716e-21	-2.3314	1.39326e-17	-0.347331	0.00564622	-0.382279	0.00725723	0.222055	0.826156	-0.530756	0.000840855	0.0349489	0.988408	0.793544
AFLA_004300	1.77636e-15	1	-1.77636e-15	1	3.55271e-15	1	-0.497019	0.115109	0	1	-1.77636e-15	1	3.55271e-15	1	0.497019	0.133214	1.77636e-15	1	1
AFLA_004310	1.77636e-15	1	-1.77636e-15	1	3.55271e-15	1	8.88178e-16	1	0	1	-1.77636e-15	1	3.55271e-15	1	2.66454e-15	1	1.77636e-15	1	1
AFLA_004320	1.77636e-15	1	-1.77636e-15	1	3.55271e-15	1	8.88178e-16	1	0	1	-1.77636e-15	1	3.55271e-15	1	2.66454e-15	1	1.77636e-15	1	1
AFLA_004330	1.77636e-15	1	-1.77636e-15	1	3.55271e-15	1	-0.630462	0.346748	-4.96534	4.68095e-12	-5.59985	5.22662e-12	3.55271e-15	1	0.630462	0.385809	0.634514	0.548489	1
AFLA_004340	2.66454e-15	1	-8.88178e-16	1	-3.19145	2.79438e-05	-0.992232	0.210085	-5.46079	6.56381e-11	-4.83246	1.63488e-08	3.55271e-15	1	-2.19922	0.00532699	-0.628325	0.666301	1
AFLA_004350	1.27522	0.108563	1.90363	0.0141367	-10.0638	3.16361e-17	-8.19464	3.8095e-14	-8.68316	5.56842e-17	-8.47889	3.38646e-15	-0.628408	1	-1.86917	0.010988	-0.204264	0.961499	6.27515e-07
AFLA_004360	-1.30985	0.145204	-0.913832	0.345946	-2.0044	0.00729348	-1.007	0.22446	1.21456	0.0620022	1.06837	0.155529	-0.396017	1	-0.997401	0.261669	0.146194	1	3.84534e-05
AFLA_004370	-1.28958	3.10553e-11	-1.18683	2.28119e-10	-1.10415	7.09178e-11	-0.834329	1.08541e-07	-0.492972	3.6484e-05	-0.272731	0.0313333	-0.10275	1	-0.269822	0.0572345	-0.220241	0.248159	0.670121
AFLA_004380	-0.908016	0.347595	-1.77636e-15	1	-0.349776	0.699937	8.88178e-16	1	2.46893	0.000300026	0.298809	0.744211	-0.908016	0.945943	-0.349776	0.775804	2.17012	0.029868	0.33151
AFLA_004390	0.485823	0.757682	0.485823	0.769685	0.0737016	1	-1.29078	0.220176	-0.595	0.506335	-0.931703	0.345868	3.55271e-15	1	1.36448	0.221896	0.336704	0.938963	0.419584
AFLA_004400	-0.366252	0.802886	-0.0354393	1	0.382639	0.701418	0.123624	0.966444	-4.22874	3.49727e-07	-3.42081	7.70856e-05	-0.330813	1	0.259015	0.877585	-0.807933	0.607272	0.407374
AFLA_004410	-0.358395	0.862064	0.0127968	1	0.417394	0.73539	-0.249537	0.895902	-6.43974	3.04428e-09	-6.3014	6.26429e-08	-0.371192	1	0.666931	0.636413	-0.138336	1	1
AFLA_004420	-1.38519	0.00149151	-3.10699	2.86151e-09	0.156753	0.734851	-0.653936	0.105811	0.627078	0.0539143	1.04526	0.00514657	1.7218	0.0127811	0.810689	0.0503658	-0.418185	0.530238	0.227017
AFLA_004430	2.66454e-15	1	-8.88178e-16	1	-0.487479	0.702168	-0.497019	0.730824	0.795505	0.412543	-0.282362	0.847456	3.55271e-15	1	0.00953968	1	1.07787	0.581005	0.820342
AFLA_004440	0.472222	0.690506	-0.163968	0.966832	-1.01964	0.192354	-1.13767	0.175505	0.815014	0.230295	-0.504664	0.548208	0.63619	1	0.118029	0.984176	1.31968	0.247539	1
AFLA_004450	0.0426879	1	1.0372	0.00631966	-1.87858	4.21138e-07	-0.931363	0.00752978	-0.6335	0.0259739	-0.319817	0.347313	-0.994517	0.190847	-0.947217	0.0084623	-0.313683	0.618203	2.6417e-07
AFLA_004460	1.10714	0.00653207	0.846414	0.0404528	-0.305911	0.419682	-0.961008	0.010366	2.87819	1.2225e-11	1.29427	0.000346623	0.260722	1	0.655097	0.0980491	1.58392	0.000518717	0.407197
AFLA_004470	-0.358403	0.825115	-1.51706	0.151858	4.12828	1.11593e-05	3.84898	7.35803e-05	1.75982	0.0203687	1.75982	0.041486	1.15865	0.916651	0.2793	0.87314	1.77636e-15	1	0.0212686
AFLA_004480	-1.10242	0.00261532	-1.22348	0.000955752	0.656524	0.0366328	0.608818	0.0723219	0.77463	0.00523728	0.891367	0.0047403	0.121061	1	0.0477066	0.984789	-0.116737	0.931841	0.874021
AFLA_004490	1.00886	0.357624	-0.801978	0.500707	0.416381	0.681185	0.416381	0.718064	0.531951	0.506749	-1.28179	0.132535	1.81084	0.545017	2.66454e-15	1	1.81374	0.130537	1
AFLA_004500	-0.336359	0.294795	-0.292379	0.384294	-0.69985	0.0059683	-0.414003	0.134376	-0.163986	0.492242	0.0785852	0.814457	-0.04398	1	-0.285847	0.361713	-0.242571	0.621969	0.271052
AFLA_004510	1.10946	4.03663e-06	0.115054	0.716941	-0.551054	0.00438469	-0.397541	0.0540117	-3.27222	2.9642e-20	-3.33505	6.80553e-19	0.994408	0.00395527	-0.153512	0.553272	0.0628255	0.951328	0.00631762
AFLA_004520	-0.0204939	1	-0.0766167	0.754807	0.267007	0.0617644	0.38373	0.0118309	-0.151841	0.232325	-0.250394	0.0787984	0.0561228	1	-0.116722	0.54178	0.0985527	0.772434	0.032925
AFLA_004530	0.789099	0.580968	-1.85769	0.121869	-0.789277	0.468808	-0.164532	0.955754	4.62315	2.06063e-06	5.10034	3.17342e-06	2.64678	0.322031	-0.624745	0.665349	-0.477197	0.88318	0.000522732
AFLA_004540	-0.174411	0.616087	-0.233151	0.477842	-0.261399	0.290607	0.060997	0.890671	0.334753	0.106971	0.618012	0.00897351	0.0587398	1	-0.322396	0.252092	-0.283259	0.485769	0.0110819
AFLA_004550	-0.15023	0.272575	0.00273936	1	0.622152	4.9433e-07	0.584221	4.02194e-06	0.0269808	0.832072	0.107962	0.341794	-0.152969	0.890698	0.0379309	0.853973	-0.0809807	0.743423	0.744441
AFLA_004560	-0.192512	0.0414675	-0.171501	0.0745153	-0.0314709	0.759348	-0.108298	0.228906	-0.0200044	0.832299	0.0148637	0.914198	-0.0210112	1	0.0768267	0.459084	-0.0348681	0.904819	0.0212449
AFLA_004570	-0.193015	0.788911	0.177586	0.822098	-0.467495	0.278908	-0.511271	0.273859	-0.327455	0.388863	0.0433311	0.974593	-0.3706	1	0.0437757	1	-0.370786	0.658023	0.833584
AFLA_004580	-1.29274	0.000154391	-1.32736	0.00011372	2.09964	3.01406e-09	1.4407	1.08927e-05	-0.75039	0.00303206	0.339474	0.245859	0.0346191	1	0.658937	0.0377134	-1.08986	0.00333468	0.779496
AFLA_004590	-0.298708	0.0721713	-0.0788617	0.741443	-0.204252	0.155058	-0.168773	0.290607	-1.03518	1.73293e-10	-0.728683	2.78031e-06	-0.219846	0.826156	-0.0354793	0.920961	-0.306501	0.122311	0.450876
AFLA_004600	-0.51336	0.00170211	-0.522273	0.00147295	-0.158013	0.278934	-0.389424	0.00922462	-0.750352	1.53635e-07	-0.843106	1.71361e-07	0.00891319	1	0.23141	0.149617	0.0927545	0.787077	0.674676
AFLA_004610	-0.204751	0.100363	-0.133486	0.323499	0.339992	0.00138747	0.213613	0.057425	-0.274268	0.00310408	-0.171114	0.102657	-0.0712655	1	0.126379	0.321453	-0.103154	0.604709	3.41204e-06
AFLA_004620	-0.374619	0.0170767	-0.143337	0.435497	-0.116598	0.426191	0.00932992	1	0.180783	0.12854	0.0506216	0.76368	-0.231282	0.756902	-0.125928	0.471968	0.130161	0.618931	0.902372
AFLA_004630	0.0075435	1	-0.0295338	0.983878	0.756186	1.2464e-05	0.373272	0.0293318	0.639603	2.30293e-05	0.606893	0.000250595	0.0370773	1	0.382914	0.0309723	0.0327108	1	0.201365
AFLA_004640	-0.841511	0.00203383	-0.593584	0.0301319	-1.429	1.38197e-07	-0.989302	0.000135017	-0.317642	0.121295	-0.478303	0.0394563	-0.247927	0.994955	-0.439695	0.0952802	0.160661	0.773911	0.000572596
AFLA_004650	0.2468	0.371919	0.125962	0.720414	3.36442	8.39591e-18	1.83118	2.93204e-10	-0.189573	0.323828	-0.372011	0.0794634	0.120838	1	1.53324	2.53142e-08	0.182438	0.680852	0.000546558
AFLA_004660	-1.04096	0.000155195	-0.854239	0.00155253	-0.583322	0.0113607	-0.366572	0.145113	-1.06898	2.07363e-06	-1.23299	1.48691e-06	-0.186723	1	-0.21675	0.464564	0.164013	0.761967	0.562683
AFLA_004670	0.389952	0.289661	0.371197	0.324046	0.758814	0.00934005	0.191054	0.603018	0.441218	0.0835374	0.453756	0.120947	0.0187554	1	0.567761	0.082446	-0.012538	1	0.0592599
AFLA_004680	-1.27467	0.0675259	-1.63689	0.0179646	2.76724	1.46407e-05	3.14825	4.73921e-06	1.59592	0.00243325	1.59592	0.00708878	0.362223	1	-0.381004	0.655262	8.88178e-16	1	0.20845
AFLA_004690	-2.33178	2.2825e-06	-2.18706	7.13183e-06	2.24615	4.4812e-07	1.09474	0.00879052	-2.61059	1.54409e-09	-0.832353	0.0321667	-0.144722	1	1.15141	0.00763654	-1.77824	0.000464215	0.00172141
AFLA_004700	-0.302444	0.0482378	-0.0989906	0.614229	0.324789	0.0130844	0.0593724	0.74367	-0.20964	0.0665553	-0.186727	0.157439	-0.203453	0.827451	0.265417	0.0691226	-0.022913	1	0.930878
AFLA_004710	-0.0630261	0.69886	-0.119467	0.388324	-0.240479	0.0208327	0.318192	0.00441291	-0.390575	5.70313e-05	0.103724	0.339975	0.0564408	1	-0.558671	6.85865e-06	-0.494299	0.000278019	0.000630423
AFLA_004720	0.0261647	1	1.30129	0.425916	0.693941	0.622242	0.929509	0.527208	1.15148	0.288766	0.821511	0.535356	-1.27512	0.995729	-0.235568	0.958448	0.329973	0.976968	0.000361748
AFLA_004730	0.403565	0.145363	0.609587	0.0230983	1.8216	5.48842e-10	1.19859	6.23399e-06	0.534051	0.0081136	0.756374	0.00118207	-0.206022	1	0.62301	0.0137936	-0.222323	0.615195	0.000192855
AFLA_004740	-0.477585	0.0178987	-0.405496	0.0480942	-0.910078	2.34886e-06	-0.896353	7.71442e-06	-0.70758	1.73441e-05	-0.92171	1.79711e-06	-0.0720897	1	-0.0137251	1	0.21413	0.469556	0.368465
AFLA_004750	0.201855	0.0715481	0.272463	0.0139377	0.635635	2.3076e-08	0.596399	2.49515e-07	0.496068	2.57294e-07	0.316673	0.00105918	-0.0706071	1	0.0392363	0.809756	0.179396	0.19802	0.00159804
AFLA_004760	-0.388991	8.93917e-07	-0.244304	0.0008088	-0.13723	0.0262706	-0.154585	0.0192522	-0.528465	4.4422e-12	-0.34706	6.48065e-07	-0.144687	0.45381	0.0173548	0.901192	-0.181405	0.0273745	0.105101
AFLA_004770	-0.312562	0.335408	-0.186819	0.626747	-0.381565	0.136924	-0.104391	0.77482	0.0547668	0.861829	-0.0165211	1	-0.125743	1	-0.277174	0.379009	0.0712879	0.973312	0.61862
AFLA_004780	-0.185465	0.417548	-0.300983	0.152868	-0.0669702	0.760342	-0.012137	1	-0.409191	0.00706069	-0.343711	0.0453314	0.115519	1	-0.0548333	0.87582	-0.0654793	0.928946	0.889469
AFLA_004790	-0.528295	0.00352594	-0.242854	0.20962	-0.798922	3.2676e-06	-0.361208	0.0300365	-0.00624168	1	-0.4973	0.00162031	-0.285441	0.696497	-0.437715	0.0109356	0.491058	0.0169093	0.0289588
AFLA_004800	-1.11212	0.0211937	-0.783558	0.11806	-0.672744	0.109069	-0.76853	0.08704	-1.85675	4.00595e-06	-1.96952	1.12505e-05	-0.328565	1	0.0957864	0.933226	0.112766	0.977066	0.00414879
AFLA_004810	-2.91125	1.37576e-10	-2.17839	8.5903e-08	-0.0867484	0.844982	-0.692897	0.0345788	-0.191102	0.510127	-0.430306	0.165094	-0.732858	0.430309	0.606149	0.0773709	0.239205	0.724241	0.0528808
AFLA_004820	0.141005	0.95328	-0.249912	0.840809	0.822331	0.197118	0.600718	0.408419	2.31247	6.22191e-05	4.19607	1.72742e-08	0.390917	1	0.221613	0.848795	-1.88361	0.0221944	0.358985
AFLA_004830	0.813424	0.00559737	0.628734	0.0341001	0.167432	0.559241	0.132551	0.695203	0.523209	0.0179269	0.253966	0.33487	0.18469	1	0.034881	0.992421	0.269242	0.559889	0.0753193
AFLA_004840	0.485823	0.722681	-0.180129	0.968992	-2.34973	0.00618902	-1.19973	0.205409	0.271218	0.768757	-0.176668	0.895818	0.665952	1	-1.15001	0.259297	0.447886	0.860704	0.456209
AFLA_004850	2.66454e-15	1	-8.88178e-16	1	-0.350557	0.655956	-0.461471	0.577961	-0.698569	0.239639	0.368369	0.625426	3.55271e-15	1	0.110914	0.976424	-1.06694	0.30114	0.992517
AFLA_004860	0.304657	0.871941	0.623114	0.644621	-1.21826	0.174926	-0.383237	0.757898	1.25687	0.102706	1.25687	0.156679	-0.318457	1	-0.835023	0.459151	0	1	0.625678
AFLA_004870	0.0569028	0.934807	0.373355	0.174285	-1.86983	1.63036e-10	-1.00487	6.05803e-05	-3.18465	4.65519e-18	-3.51462	1.06705e-17	-0.316452	0.886132	-0.864958	0.000562479	0.329973	0.355863	0.833312
AFLA_004880	1.77636e-15	1	-1.77636e-15	1	3.55271e-15	1	8.88178e-16	1	-5.80256	1.76216e-22	-5.84489	5.56425e-21	3.55271e-15	1	2.66454e-15	1	0.0423267	1	0.907063
AFLA_004890	-0.385751	0.781118	-0.180129	0.961551	-1.97498	0.0142009	-2.32275	0.00701353	-4.38264	1.13972e-07	-4.0915	3.68294e-06	-0.205622	1	0.347767	0.797324	-0.291144	0.936123	0.293971
AFLA_004900	-0.389076	0.0180862	-0.271149	0.112261	-0.53853	0.000248358	-0.488049	0.00147382	-0.217076	0.0802563	-0.338187	0.0166549	-0.117927	1	-0.0504812	0.849391	0.121111	0.684824	1
AFLA_004910	1.95144	6.52988e-05	1.63102	0.000648107	2.88589	5.92173e-09	3.59575	1.42567e-10	4.13571	4.26187e-14	4.26566	5.13231e-13	0.320417	1	-0.709855	0.12235	-0.129946	0.954097	0.0217589
AFLA_004920	-0.299301	0.118852	-0.27085	0.168367	-0.0127369	1	-0.0419789	0.88739	0.150406	0.297024	-0.0511846	0.807146	-0.0284505	1	0.029242	0.966071	0.20159	0.456655	0.967239
AFLA_004930	-0.259277	0.263036	-0.0712901	0.852449	0.162006	0.416201	0.0969384	0.694527	-0.0885136	0.62575	-0.062838	0.790246	-0.187987	0.997589	0.065068	0.851014	-0.0256756	1	0.823358
AFLA_004940	-0.505183	0.000450533	-0.554018	0.000150662	-0.173476	0.162662	-0.0480506	0.788147	-0.159237	0.137031	-0.0641849	0.644904	0.0488345	1	-0.125426	0.415459	-0.0950516	0.724241	0.604445
AFLA_004950	0.333518	0.134448	0.374373	0.0909059	0.794441	5.04883e-05	0.562785	0.00455826	1.35375	1.91e-10	0.848534	1.86955e-05	-0.0408553	1	0.231656	0.300848	0.505221	0.0431398	2.89886e-06
AFLA_004960	0.548333	0.0763347	0.454432	0.155573	0.385867	0.147919	0.57862	0.0392146	0.586752	0.0106911	0.978851	0.000297555	0.0939008	1	-0.192753	0.594705	-0.392099	0.346414	0.0045772
AFLA_004970	-0.469729	0.0286747	-0.527455	0.0141851	0.204063	0.289753	0.533171	0.00693444	0.214456	0.18941	0.154162	0.433425	0.0577257	1	-0.329107	0.115847	0.0602935	0.951328	0.85036
AFLA_004980	-0.243824	0.252769	0.000374861	1	0.140445	0.449801	0.348229	0.0572071	-0.34772	0.0195826	-0.944338	8.21735e-07	-0.244199	0.879379	-0.207784	0.31631	0.596618	0.00736328	0.370993
AFLA_004990	1.77636e-15	1	-1.77636e-15	1	3.55271e-15	1	8.88178e-16	1	0	1	-1.77636e-15	1	3.55271e-15	1	2.66454e-15	1	1.77636e-15	1	1
AFLA_005000	1.77636e-15	1	-1.77636e-15	1	3.55271e-15	1	8.88178e-16	1	0	1	-1.77636e-15	1	3.55271e-15	1	2.66454e-15	1	1.77636e-15	1	1
AFLA_005010	-2.63792	0.0252764	-2.06129	0.0892446	-0.67791	0.554529	-1.01388	0.390331	-0.259398	0.824291	-1.97637	0.0502594	-0.576631	1	0.335968	0.865858	1.71697	0.263105	1
AFLA_005020	-2.41264	7.6276e-09	-2.31706	1.87922e-08	0.265052	0.417166	0.185033	0.635116	-1.98129	2.41778e-09	-2.29854	1.35753e-09	-0.0955782	1	0.0800195	0.912119	0.31725	0.568716	0.586955
AFLA_005030	-1.43508	5.72181e-07	-0.808701	0.00194377	0.193604	0.421196	0.423304	0.0780373	-0.608278	0.00214227	-0.690727	0.0021525	-0.62638	0.267175	-0.229701	0.414836	0.0824494	0.931841	0.144168
AFLA_005040	0.784613	0.00623471	0.846471	0.00338129	-0.0473399	0.918342	0.509616	0.0548742	1.58107	4.06565e-09	1.68733	1.39549e-08	-0.0618585	1	-0.556956	0.0426631	-0.106268	0.904917	0.610724
AFLA_005050	-2.32849	1.79585e-08	-2.28175	2.80601e-08	-2.20017	4.22061e-09	-1.72027	1.63265e-06	-0.518682	0.0505405	-0.345971	0.268692	-0.0467446	1	-0.479895	0.172601	-0.172711	0.835572	4.72516e-09
AFLA_005070	-1.03166	0.0208313	-0.852505	0.0614045	-1.6005	7.66439e-05	-0.849077	0.0391618	-1.1316	0.00102829	-0.999903	0.0092249	-0.179156	1	-0.751422	0.0816213	-0.131697	0.943992	9.52279e-05
AFLA_005080	-0.610966	0.256593	-0.665952	0.213161	2.66454e-15	1	0	1	0.702595	0.0613973	0.702595	0.102692	0.0549851	1	2.66454e-15	1	1.77636e-15	1	1
AFLA_005090	-2.3658	0.0561265	-2.16634	0.0857605	-0.650931	0.590893	1.78091	0.120875	0.0586537	1	-1.47325	0.167625	-0.199456	1	-2.43184	0.0380095	1.5319	0.366699	0.409877
AFLA_005100	0.767829	0.0768969	0.871972	0.0441918	-1.67851	2.05771e-05	-1.30696	0.00104874	0.982132	0.00261717	0.736045	0.0441037	-0.104144	1	-0.371547	0.425668	0.246087	0.784051	1
AFLA_005110	0.072026	1	2.68339	0.00239984	-1.06135	0.168924	-0.279029	0.807531	2.07238	0.00204694	2.35919	0.00200518	-2.61137	0.107625	-0.782319	0.411711	-0.286817	0.928932	0.0968155
AFLA_005120	2.02981	4.97381e-08	1.63189	3.16941e-06	0.584729	0.0352804	0.487367	0.106385	-1.82597	2.26081e-09	-3.10101	1.22412e-13	0.397924	0.879596	0.097362	0.852723	1.27504	0.000421295	0.553946
AFLA_005130	-1.05001	0.0183591	-1.19303	0.00765124	-5.01269	1.76339e-15	-4.3826	2.77255e-13	-1.83925	1.20834e-06	-1.45775	0.000243008	0.143021	1	-0.630083	0.152565	-0.381503	0.598495	0.363184
AFLA_005140	1.77636e-15	1	-1.77636e-15	1	3.55271e-15	1	8.88178e-16	1	0	1	-1.77636e-15	1	3.55271e-15	1	2.66454e-15	1	1.77636e-15	1	1
AFLA_005150	1.77636e-15	1	-1.77636e-15	1	3.55271e-15	1	8.88178e-16	1	0	1	-1.77636e-15	1	3.55271e-15	1	2.66454e-15	1	1.77636e-15	1	1
AFLA_005160	1.77636e-15	1	-1.77636e-15	1	3.55271e-15	1	8.88178e-16	1	0	1	-1.77636e-15	1	3.55271e-15	1	2.66454e-15	1	1.77636e-15	1	1
AFLA_005170	1.77636e-15	1	-1.77636e-15	1	3.55271e-15	1	8.88178e-16	1	0	1	-1.77636e-15	1	3.55271e-15	1	2.66454e-15	1	1.77636e-15	1	1
AFLA_005180	1.77636e-15	1	-1.77636e-15	1	3.55271e-15	1	8.88178e-16	1	0	1	-1.77636e-15	1	3.55271e-15	1	2.66454e-15	1	1.77636e-15	1	1
AFLA_005190	1.77636e-15	1	-1.77636e-15	1	3.55271e-15	1	8.88178e-16	1	0	1	-1.77636e-15	1	3.55271e-15	1	2.66454e-15	1	1.77636e-15	1	1
AFLA_005200	1.77636e-15	1	-1.77636e-15	1	3.55271e-15	1	8.88178e-16	1	0	1	-1.77636e-15	1	3.55271e-15	1	2.66454e-15	1	1.77636e-15	1	1
AFLA_005210	1.77636e-15	1	-1.77636e-15	1	3.55271e-15	1	8.88178e-16	1	0	1	-1.77636e-15	1	3.55271e-15	1	2.66454e-15	1	1.77636e-15	1	1
AFLA_005220	1.77636e-15	1	-1.77636e-15	1	3.55271e-15	1	8.88178e-16	1	0	1	-1.77636e-15	1	3.55271e-15	1	2.66454e-15	1	1.77636e-15	1	1
AFLA_005230	1.77636e-15	1	-1.77636e-15	1	3.55271e-15	1	8.88178e-16	1	0	1	-1.77636e-15	1	3.55271e-15	1	2.66454e-15	1	1.77636e-15	1	1
AFLA_005240	1.77636e-15	1	-1.77636e-15	1	3.55271e-15	1	8.88178e-16	1	0	1	-1.77636e-15	1	3.55271e-15	1	2.66454e-15	1	1.77636e-15	1	1
AFLA_005250	1.77636e-15	1	-1.77636e-15	1	3.55271e-15	1	8.88178e-16	1	0	1	-1.77636e-15	1	3.55271e-15	1	2.66454e-15	1	1.77636e-15	1	1
AFLA_005260	1.77636e-15	1	-1.77636e-15	1	3.55271e-15	1	8.88178e-16	1	0	1	-1.77636e-15	1	3.55271e-15	1	2.66454e-15	1	1.77636e-15	1	1
AFLA_005270	1.77636e-15	1	-1.77636e-15	1	3.55271e-15	1	8.88178e-16	1	0	1	-1.77636e-15	1	3.55271e-15	1	2.66454e-15	1	1.77636e-15	1	1
AFLA_005280	0.50386	0.730015	-0.657138	0.636135	-1.11225	0.235998	0	1	1.05835	0.187472	-1.08503	0.242423	1.161	0.928753	-1.11225	0.312872	2.14338	0.0881756	0.10015
AFLA_005290	-0.759231	0.00118999	-0.81288	0.000580226	-1.05449	2.02035e-06	-0.761732	0.000486821	0.121093	0.523362	0.287023	0.154727	0.053649	1	-0.292756	0.212726	-0.16593	0.697067	0.675841
AFLA_005300	1.77636e-15	1	-1.77636e-15	1	3.55271e-15	1	8.88178e-16	1	0.368253	0.11117	0.368253	0.167251	3.55271e-15	1	2.66454e-15	1	1.77636e-15	1	0.638064
AFLA_005310	0.505003	0.73155	0.505003	0.745111	0.316219	0.794187	-0.689097	0.536716	3.34771	7.72654e-05	2.72672	0.00304196	2.66454e-15	1	1.00532	0.376177	0.620991	0.778302	0.395373
AFLA_005320	1.77636e-15	1	-1.77636e-15	1	3.55271e-15	1	8.88178e-16	1	0	1	-1.77636e-15	1	3.55271e-15	1	2.66454e-15	1	1.77636e-15	1	1
AFLA_005330	1.77636e-15	1	-1.77636e-15	1	3.55271e-15	1	8.88178e-16	1	0	1	-1.77636e-15	1	3.55271e-15	1	2.66454e-15	1	1.77636e-15	1	1
AFLA_005340	1.77636e-15	1	-1.77636e-15	1	3.55271e-15	1	8.88178e-16	1	0	1	-1.77636e-15	1	3.55271e-15	1	2.66454e-15	1	1.77636e-15	1	1
AFLA_005350	1.77636e-15	1	-1.77636e-15	1	3.55271e-15	1	8.88178e-16	1	0	1	-1.77636e-15	1	3.55271e-15	1	2.66454e-15	1	1.77636e-15	1	1
AFLA_005360	-0.629141	0.239729	-0.09982	0.957516	0.11859	0.850599	0.836059	0.0710546	0.472204	0.216737	0.591313	0.174323	-0.529321	0.941635	-0.717469	0.145135	-0.119109	0.976043	1
AFLA_005370	1.5419	0.12067	0.824761	0.472421	4.16373	4.65322e-06	4.02133	2.03127e-05	0.832685	0.261732	1.06044	0.208815	0.717136	1	0.142399	0.972964	-0.227758	0.976212	0.255743
AFLA_005380	1.77636e-15	1	-1.77636e-15	1	3.55271e-15	1	8.88178e-16	1	-0.459555	0.111145	-1.77636e-15	1	3.55271e-15	1	2.66454e-15	1	-0.459555	0.388643	0.409877
AFLA_005390	-3.59302	0.000404157	-4.06167	8.90085e-05	-2.62559	0.0024752	-2.80641	0.00239008	-1.75533	0.0192331	-2.15703	0.011699	0.468645	1	0.180813	0.947227	0.401699	0.88895	1
AFLA_005400	1.77636e-15	1	-1.77636e-15	1	3.55271e-15	1	8.88178e-16	1	0	1	-1.77636e-15	1	3.55271e-15	1	2.66454e-15	1	1.77636e-15	1	1
AFLA_005410	1.77636e-15	1	-1.77636e-15	1	3.55271e-15	1	8.88178e-16	1	0	1	-1.77636e-15	1	3.55271e-15	1	2.66454e-15	1	1.77636e-15	1	1
AFLA_005420	1.77636e-15	1	-1.77636e-15	1	3.55271e-15	1	8.88178e-16	1	0	1	-1.77636e-15	1	3.55271e-15	1	2.66454e-15	1	1.77636e-15	1	1
AFLA_005430	1.21537	0.000212805	0.117186	0.824052	0.291786	0.312633	0.0137228	1	0.586155	0.0149064	0.0193612	1	1.09818	0.0442439	0.278063	0.42596	0.566794	0.151445	0.192911
AFLA_005440	1.70825	0.0579132	-1.16268	0.22528	-2.14131	0.00547822	-2.35901	0.00415428	-4.52117	2.29861e-08	-4.787	8.61166e-08	2.87093	0.0668036	0.217691	0.898933	0.265833	0.942755	0.814288
AFLA_005450	0.485864	0.820471	0.485864	0.828966	-0.910489	0.474475	-1.51	0.244859	-2.23435	0.0274259	-2.8357	0.0141285	3.55271e-15	1	0.599506	0.741407	0.601347	0.863097	0.132263
AFLA_005460	2.66454e-15	1	-8.88178e-16	1	-2.73431	0.00182303	-1.93974	0.0361558	-2.87495	0.000267783	-2.27074	0.00861369	3.55271e-15	1	-0.794576	0.479923	-0.604212	0.768028	1
AFLA_005470	1.77636e-15	1	-1.77636e-15	1	-0.535754	0.696763	-1.2689	0.330067	-1.44107	0.150161	-0.803308	0.517819	3.55271e-15	1	0.73315	0.654207	-0.63776	0.84065	0.0620534
AFLA_005480	-0.0827583	0.92542	0.213702	0.655237	0.523895	0.0918125	0.683414	0.038544	0.811251	0.00301058	1.18304	0.000215553	-0.296461	1	-0.159519	0.741301	-0.371786	0.482203	0.223056
AFLA_005490	-0.496257	0.199409	0.176357	0.741225	0.799024	0.0113347	1.15059	0.000788212	0.94209	0.000871345	1.3071	7.77204e-05	-0.672614	0.54683	-0.351565	0.367399	-0.365012	0.508516	0.177964
AFLA_005500	-0.334567	0.346619	-0.242255	0.542451	1.69222	1.31692e-07	1.96734	1.97899e-08	0.657509	0.00677861	0.729259	0.0081876	-0.092312	1	-0.275122	0.433233	-0.0717493	0.981681	0.635469
AFLA_005510	0.0686445	0.828061	0.0241665	1	1.34944	4.32664e-10	1.62856	1.82823e-11	0.426967	0.00409185	0.0540913	0.805264	0.0444781	1	-0.279115	0.147829	0.372875	0.113783	0.848959
AFLA_005520	0.284998	0.18397	0.575058	0.005011	-0.469094	0.00771899	0.0361628	0.927311	-0.212294	0.171536	-0.0226042	0.955472	-0.29006	0.785894	-0.505257	0.00918425	-0.18969	0.553401	0.286837
AFLA_005530	-0.180622	0.730015	0.138504	0.823876	-0.93364	0.00431362	-0.510759	0.151573	0.119102	0.724646	0.100696	0.814619	-0.319126	1	-0.422881	0.278255	0.0184054	1	0.0140598
AFLA_005540	-0.566425	0.0220046	-0.00921954	1	1.92136	2.67052e-11	1.40466	9.39201e-08	0.785216	7.10543e-05	0.653555	0.00237161	-0.557206	0.3403	0.516698	0.0283873	0.131661	0.811226	0.967898
AFLA_005550	-0.783222	0.00503405	-0.511573	0.0736755	2.27535	8.27801e-12	0.76649	0.00302546	1.3809	3.88729e-08	1.16579	7.88056e-06	-0.271649	0.976469	1.50886	4.01043e-07	0.215112	0.658423	0.265688
AFLA_005560	-1.31584	4.68111e-05	-1.02471	0.00108427	1.06048	0.000138123	0.463186	0.109429	-0.209653	0.391806	-0.547752	0.0386905	-0.291132	0.987666	0.597291	0.0438678	0.338099	0.45093	1
AFLA_005570	-1.01504	0.00590375	-0.529005	0.175582	-0.865232	0.00664342	-0.0614628	0.935594	0.146546	0.641731	0.16304	0.655535	-0.486035	0.84058	-0.803769	0.0220241	-0.0164944	1	1.70213e-08
AFLA_005580	-0.507773	0.0225531	-0.595602	0.00767661	-1.01977	1.7844e-06	-0.504354	0.0137696	-1.73448	1.03217e-12	-1.84582	5.06063e-12	0.087829	1	-0.515416	0.0146506	0.111341	0.828875	1
AFLA_005590	-0.270182	0.325803	-0.292674	0.28613	-0.0267146	0.971213	-0.268891	0.267205	-0.694463	0.000377823	-0.575709	0.0074505	0.0224924	1	0.242176	0.362574	-0.118754	0.844676	0.0250663
AFLA_005600	-0.464692	0.0417384	-0.37969	0.105499	-0.475224	0.0149642	-0.331278	0.118704	-1.22733	5.95749e-09	-0.696576	0.000509068	-0.0850026	1	-0.143946	0.59381	-0.530758	0.043883	0.000153205
AFLA_005610	-0.187815	0.599539	-0.100947	0.835853	0.445652	0.0715679	-0.0498538	0.929868	-1.03249	1.12354e-05	-0.876891	0.000523449	-0.0868679	1	0.495506	0.0721686	-0.155596	0.804237	4.10999e-05
AFLA_005620	-0.750289	0.001598	-0.423923	0.0802303	0.435228	0.0319843	0.215696	0.357657	-1.89496	4.77114e-13	-1.86579	1.62335e-11	-0.326366	0.806846	0.219532	0.386881	-0.0291694	1	0.304889
AFLA_005630	1.05362	0.421996	-0.469814	0.792651	0.754342	0.488226	0.172387	0.949753	1.25876	0.147786	2.70156	0.00629782	1.52343	0.837173	0.581955	0.691958	-1.4428	0.362539	0.00680162
AFLA_005640	0.513421	0.00431474	0.790862	3.03274e-05	0.103228	0.555834	0.0259357	0.95438	0.404821	0.00316462	0.13689	0.403736	-0.27744	0.714954	0.0772924	0.752389	0.267931	0.247539	4.00671e-12
AFLA_005650	0.224515	0.885337	0.845929	0.34405	2.40355	0.000638518	2.57849	0.000586406	-1.24011	0.0387303	-1.60124	0.0192098	-0.621414	1	-0.174934	0.918676	0.361126	0.860254	1.20793e-09
AFLA_005660	0.785808	4.71792e-07	0.828654	1.75099e-07	1.10838	1.7385e-11	0.720022	6.47142e-07	0.218512	0.0381883	0.508238	6.35883e-05	-0.0428456	1	0.388359	0.00372942	-0.289726	0.0829296	0.144235
AFLA_005670	1.77636e-15	1	-1.77636e-15	1	3.55271e-15	1	8.88178e-16	1	-0.459216	0.111145	-1.77636e-15	1	3.55271e-15	1	2.66454e-15	1	-0.459216	0.388643	0.356913
AFLA_005680	1.77636e-15	1	-1.77636e-15	1	3.55271e-15	1	8.88178e-16	1	0	1	-1.77636e-15	1	3.55271e-15	1	2.66454e-15	1	1.77636e-15	1	0.0208204
AFLA_005690	0.127885	0.562211	0.2865	0.127242	0.300971	0.0528929	0.137019	0.45915	-0.0603256	0.705403	-0.322414	0.0368361	-0.158615	0.997269	0.163952	0.400288	0.262088	0.264817	0.744441
AFLA_005700	0.813266	0.00585723	0.799813	0.00695768	-0.199749	0.474042	-0.498589	0.0684559	1.3841	1.13972e-07	1.62907	5.05771e-08	0.0134524	1	0.29884	0.337209	-0.244975	0.618203	4.04939e-05
AFLA_005710	0.325002	0.200689	0.515176	0.033801	0.86193	7.53727e-05	0.625355	0.00478019	0.0769482	0.719393	0.550439	0.00775751	-0.190175	1	0.236574	0.353525	-0.473491	0.0994065	0.603437
AFLA_005720	0.468236	0.00803301	0.393427	0.0276377	1.20406	6.12445e-10	0.713522	3.40662e-05	-0.738614	9.97109e-07	-1.25544	2.16739e-10	0.0748092	1	0.490533	0.00372723	0.516828	0.00976485	0.614244
AFLA_005730	-0.430363	0.126899	-0.337841	0.254266	0.472812	0.0439251	-0.0740987	0.847815	0.864031	7.33514e-05	0.183016	0.468782	-0.0925212	1	0.546911	0.035833	0.681014	0.029505	0.0761912
AFLA_005740	-1.03342	8.07955e-11	-0.856093	6.29879e-09	-0.646423	1.55652e-07	-0.273425	0.0160393	-0.0202906	0.885161	-0.162562	0.128335	-0.177325	0.777463	-0.372998	0.00163869	0.142271	0.416037	0.327753
AFLA_005750	0.637642	1.37592e-07	0.743274	5.65556e-09	1.04896	6.54072e-14	0.973807	1.89314e-12	0.841502	7.47663e-13	1.11822	1.16747e-14	-0.105632	0.966717	0.0751569	0.54178	-0.276719	0.0230012	1.68307e-05
AFLA_005760	0.67928	0.202041	1.4735	0.00362133	3.24496	2.03751e-09	2.24952	6.93601e-06	4.02744	5.22069e-13	3.09924	5.18018e-09	-0.794224	0.696624	0.995445	0.0386327	0.928198	0.130508	0.655522
AFLA_005770	-0.135521	0.412741	-0.117586	0.505008	0.239754	0.0557596	0.373145	0.00537876	0.360728	0.0012685	0.327549	0.0087988	-0.0179352	1	-0.133391	0.394534	0.033179	0.980298	1.99658e-05
AFLA_005780	1.77891	0.000144299	0.744147	0.114035	1.35333	0.000716928	1.50348	0.000443353	4.94656	1.29356e-16	5.0728	2.05525e-15	1.03476	0.325749	-0.150153	0.830521	-0.126243	0.953068	1.01315e-05
AFLA_005790	-1.0179	6.98403e-06	-0.807599	0.000213125	-0.399212	0.028296	0.20051	0.337903	2.09153	1.93755e-15	1.89942	7.01106e-13	-0.210304	0.965824	-0.599722	0.00304306	0.192105	0.566337	2.34106e-05
AFLA_005800	-0.931938	5.62058e-06	-0.873129	1.69609e-05	-0.0206731	0.970375	-0.216853	0.238502	0.485888	0.000999576	0.292632	0.0750321	-0.0588093	1	0.19618	0.329352	0.193255	0.498974	4.35105e-13
AFLA_005810	-0.156689	0.235594	-0.200633	0.117589	0.0376441	0.787861	-0.138651	0.243776	-0.150386	0.106808	-0.0979691	0.38164	0.0439441	1	0.176295	0.148097	-0.0524168	0.876157	0.859195
AFLA_005820	0.0296457	1	-0.0984376	0.770313	0.25412	0.197506	0.621206	0.00265481	0.354279	0.0347229	0.568691	0.00327364	0.128083	1	-0.367086	0.0897647	-0.214412	0.533455	0.510575
AFLA_005830	-0.350671	0.87588	-0.291462	0.923509	2.11042	0.0393911	1.66236	0.137619	1.55605	0.0829571	1.55605	0.131326	-0.0592091	1	0.448058	0.793697	8.88178e-16	1	0.0343031
AFLA_005840	-0.0255554	1	-0.0549393	1	-0.339135	0.397712	0.17858	0.72712	-0.505568	0.12243	-0.438217	0.251332	0.0293839	1	-0.517715	0.241551	-0.0673513	1	0.42125
AFLA_005850	0.0674167	0.806717	0.259849	0.16815	0.233494	0.134098	0.322981	0.0501424	0.464593	0.000780628	0.367885	0.0162714	-0.192433	0.939411	-0.0894876	0.696989	0.0967077	0.806281	0.621704
AFLA_005860	-0.330737	0.0663123	-0.276088	0.137178	0.224032	0.150618	-0.0501211	0.839218	-0.367135	0.00646885	-0.126498	0.439682	-0.0546497	1	0.274153	0.114426	-0.240637	0.31287	0.562975
AFLA_005870	0.648095	9.45331e-05	0.564736	0.000549059	0.727001	2.10991e-06	0.710625	7.89209e-06	0.198537	0.100844	0.616499	2.75357e-05	0.0833586	1	0.0163754	1	-0.417961	0.0223244	0.941648
AFLA_005880	-0.238581	0.879397	1.12064	0.203328	1.6881	0.017316	0.442061	0.626961	-1.20465	0.052002	-0.302569	0.722587	-1.35923	0.659915	1.24604	0.122309	-0.902077	0.450442	0.246446
AFLA_005890	-0.0597486	1	-0.0925078	1	-0.832532	0.23189	-0.314117	0.73498	0.526048	0.395445	0.970871	0.153244	0.0327592	1	-0.518416	0.572099	-0.444823	0.787597	0.11671
AFLA_005900	-0.0543843	0.642094	0.0587891	0.616951	-0.358622	1.88996e-05	-0.452332	1.09575e-06	0.102937	0.133729	0.0884247	0.271332	-0.113173	0.874232	0.0937098	0.325212	0.0145123	1	0.00916183
AFLA_005910	-0.149207	0.0685	-0.127707	0.129356	0.351459	4.21153e-06	0.254755	0.000767092	0.107303	0.0778747	-0.0078733	0.96708	-0.0214995	1	0.0967041	0.24105	0.115176	0.278188	0.0504745
AFLA_005920	0.0344369	0.941878	0.0164124	1	0.250867	0.0758911	0.426728	0.00468042	0.461805	0.00031261	0.566058	0.000117783	0.0180245	1	-0.175861	0.301863	-0.104253	0.745196	0.249039
AFLA_005930	0.849654	7.61518e-06	0.674394	0.000225628	-0.230593	0.13726	-0.542436	0.0010786	-0.0907093	0.533308	-0.214279	0.166355	0.17526	0.967194	0.311844	0.0680902	0.123569	0.710592	0.653137
AFLA_005940	0.0342596	0.985823	0.187516	0.480767	0.587421	0.00240733	-0.235294	0.276102	-0.591994	0.000609013	-0.376067	0.0482123	-0.153256	1	0.822715	0.000161172	-0.215928	0.525823	0.116034
AFLA_005950	-1.50018	0.000216402	-1.29746	0.00117459	0.646571	0.057794	1.09413	0.00279361	-2.63661	4.92644e-11	-2.34614	1.12514e-08	-0.202727	1	-0.447559	0.271597	-0.290472	0.684824	1
AFLA_005960	1.02151	4.17918e-07	1.02352	4.10822e-07	1.7897	5.72198e-14	1.73808	5.17968e-13	0.177213	0.200002	0.083031	0.64113	-0.00200882	1	0.0516263	0.865866	0.0941823	0.816809	0.589361
AFLA_005970	0.142954	0.123095	0.183465	0.0441287	0.293195	0.00025183	0.370808	2.39089e-05	-0.0243825	0.770303	0.162483	0.034532	-0.0405113	1	-0.0776128	0.429675	-0.186866	0.0810128	0.0122901
AFLA_005980	-0.0334318	0.992673	-0.0371142	0.982774	0.630674	0.00173975	0.280666	0.201832	-0.461352	0.0082085	-0.15848	0.456486	0.00368245	1	0.350008	0.120451	-0.302872	0.333158	1
AFLA_005990	1.66669	5.93514e-11	1.66145	6.44062e-11	1.75228	8.58696e-13	1.48934	1.81678e-10	2.34197	1.05939e-17	2.6938	7.72508e-18	0.00524214	1	0.262941	0.181583	-0.35183	0.146816	0.907063
AFLA_006000	1.77636e-15	1	-1.77636e-15	1	3.55271e-15	1	8.88178e-16	1	0.963377	0.0151025	0.963377	0.0325229	3.55271e-15	1	2.66454e-15	1	1.77636e-15	1	8.35937e-09
AFLA_006010	2.24251	0.0295962	1.326	0.232277	0.443499	0.674855	0.165772	0.940419	-0.929529	0.239421	-0.388091	0.7127	0.91651	0.997216	0.277727	0.877808	-0.541438	0.813093	0.357809
AFLA_006020	3.96303	3.97248e-05	3.25122	0.000541462	1.34774	0.0918601	0.686739	0.469454	-1.62054	0.0194744	-2.00161	0.011478	0.711813	1	0.660998	0.533146	0.381077	0.883163	0.314434
AFLA_006030	-0.366684	0.00884239	-0.450079	0.00150417	-0.453806	0.000282947	-0.694241	1.26969e-06	-0.508498	1.04952e-05	-0.732559	1.52643e-07	0.0833957	1	0.240435	0.0754546	0.224061	0.207105	0.520433
AFLA_006040	0.554917	0.277062	0.910399	0.0577033	0.45195	0.285366	-0.344905	0.478122	-0.594345	0.0940743	0.368204	0.389278	-0.355482	1	0.796855	0.0793916	-0.962549	0.0868763	1.0634e-10
AFLA_006050	0.109495	0.870076	0.646229	0.0841479	1.16794	0.000310461	0.467516	0.175539	2.31665	1.48866e-10	1.42523	2.11666e-05	-0.536735	0.755403	0.700427	0.0444985	0.891423	0.033391	0.792237
AFLA_006060	0.132048	0.700194	0.225856	0.452121	1.01106	1.76515e-05	0.875052	0.000281819	0.23711	0.224009	0.0684912	0.812452	-0.0938084	1	0.136005	0.670524	0.168619	0.728706	6.11414e-07
AFLA_006070	-0.0705143	0.485162	0.0554547	0.619172	0.181056	0.0143929	0.157706	0.0467573	-0.197311	0.00265119	0.0936797	0.213553	-0.125969	0.759834	0.0233504	0.876673	-0.290991	0.00245881	0.00416782
AFLA_006080	0.496639	0.779034	0.448528	0.81832	0.691993	0.552167	-0.911781	0.457113	4.3421	1.01971e-05	4.14942	0.000114952	0.0481109	1	1.60377	0.18011	0.192678	1	0.557288
AFLA_006090	1.41063	0.404426	-0.736512	0.731667	-5.33007	7.91369e-05	-4.0216	0.00353356	-9.55454	1.25422e-10	-9.31461	3.75722e-09	2.14714	0.776003	-1.30847	0.421935	-0.239925	1	0.762263
AFLA_006100	-0.27081	0.455609	-0.31334	0.37992	-2.62804	4.02315e-12	-1.62345	5.50453e-07	-0.0926763	0.74529	0.33153	0.228921	0.0425298	1	-1.00459	0.000852614	-0.424206	0.312574	6.79739e-06
AFLA_006110	0.369735	0.039381	0.347865	0.055809	0.29036	0.0594399	0.253427	0.130438	0.00213958	1	0.0922617	0.591196	0.0218691	1	0.0369324	0.927225	-0.0901221	0.825216	0.933602
AFLA_006120	-0.474284	0.000523862	-0.28991	0.0328973	0.395491	0.00082974	0.519315	6.27994e-05	-0.261155	0.0101698	-0.0225923	0.905048	-0.184374	0.811894	-0.123824	0.393032	-0.238563	0.151291	0.000605249
AFLA_006130	0.173183	0.390204	0.130219	0.560992	0.195664	0.217628	0.16444	0.353833	-0.197895	0.14402	-0.272973	0.0756866	0.0429638	1	0.0312243	0.952763	0.0750779	0.879521	0.423175
AFLA_006140	-0.165356	0.147934	-0.0604521	0.690852	-0.293578	0.00217891	-0.375526	0.000303614	-0.293941	0.000582519	-0.273231	0.00405932	-0.104903	0.985345	0.081948	0.512164	-0.0207098	0.998504	0.169213
AFLA_006150	0.466356	0.06194	0.469448	0.0626077	1.00141	1.29791e-05	0.904437	0.000127997	-0.120551	0.554014	0.224254	0.308599	-0.00309176	1	0.0969704	0.781626	-0.344805	0.292791	1
AFLA_006160	-0.106589	0.528876	-0.00520437	1	-0.0846527	0.534934	0.201754	0.127687	0.28292	0.00812396	0.469596	0.000197894	-0.101385	1	-0.286406	0.033576	-0.186676	0.329334	1
AFLA_006170	-0.275531	0.29495	-0.245233	0.36953	-0.517816	0.0127652	-0.962894	3.92174e-05	-0.788176	4.78031e-05	-0.506799	0.0142819	-0.0302978	1	0.445079	0.054116	-0.281377	0.407928	0.727398
AFLA_006180	-0.325744	0.455283	-0.263012	0.581287	-0.0911159	0.846792	0.30378	0.425767	-0.251971	0.398315	-0.0995651	0.816956	-0.0627321	1	-0.394896	0.316648	-0.152406	0.88822	0.820342
AFLA_006190	0.641564	0.690345	0.21625	0.969754	0.044847	1	-0.730242	0.569372	-1.02849	0.26693	-1.24798	0.238596	0.425314	1	0.775089	0.586354	0.219492	1	0.176625
AFLA_006200	-1.03027	0.421996	0.505003	0.763533	-1.92208	0.0464861	-1.61528	0.124355	-0.747711	0.40028	-1.13424	0.251811	-1.53528	0.813107	-0.3068	0.87582	0.38653	0.917868	0.577269
AFLA_006210	-0.439043	0.247873	-0.346172	0.392965	-0.88925	0.00373847	-0.333594	0.33981	0.176825	0.542785	0.0834749	0.842652	-0.0928703	1	-0.555656	0.106394	0.0933496	0.961499	0.00419452
AFLA_006220	0.195235	0.286087	0.280384	0.107174	-0.0268314	0.923129	-0.119054	0.495153	0.117678	0.374367	0.0548277	0.75979	-0.085149	1	0.0922227	0.659258	0.06285	0.903122	0.0109434
AFLA_006230	0.860723	0.000170123	1.04427	1.09483e-05	1.24706	3.98535e-08	1.76124	6.35861e-11	0.810106	9.70651e-06	0.966768	4.14451e-06	-0.18355	1	-0.514181	0.0148306	-0.156662	0.704827	0.236921
AFLA_006240	-0.231123	0.426611	-0.0996763	0.804493	-0.463377	0.0337149	0.134922	0.630774	0.492048	0.0102653	0.220711	0.331827	-0.131447	1	-0.598299	0.0129608	0.271337	0.464407	0.570055
AFLA_006250	0.586897	0.284457	1.18059	0.019852	-0.0793489	0.925058	-0.624584	0.19269	-0.879599	0.0203684	-0.46986	0.294285	-0.593691	0.899331	0.545235	0.298786	-0.409739	0.630586	0.000106506
AFLA_006260	0.0552639	0.966537	0.272912	0.455235	0.527063	0.0476575	0.33605	0.261712	0.0894224	0.751942	0.357971	0.184813	-0.217648	1	0.191013	0.605054	-0.268549	0.590055	0.00279755
AFLA_006270	-0.138675	0.184121	-0.124954	0.245056	-0.149136	0.0825916	0.133549	0.153875	-0.178898	0.0166598	-0.215033	0.0116457	-0.0137213	1	-0.282685	0.00287438	0.0361349	0.908184	0.585328
AFLA_006280	-0.647883	2.68798e-06	-0.429221	0.000892218	0.497441	2.26839e-05	0.207757	0.0789781	-0.121554	0.212014	-0.320002	0.00370772	-0.218662	0.622604	0.289683	0.0164704	0.198448	0.221051	0.00449111
AFLA_006290	0.352309	0.107229	0.0906491	0.781503	0.211589	0.26753	0.38639	0.0492989	0.46081	0.00441059	0.168194	0.383721	0.26166	0.879596	-0.174801	0.457582	0.292617	0.303305	0.0192039
AFLA_006300	0.562088	0.016597	0.436668	0.069265	1.10397	1.14238e-06	0.62692	0.00388323	-0.164817	0.372963	-0.302477	0.137387	0.12542	1	0.477055	0.0332923	0.13766	0.778182	0.162688
AFLA_006310	-0.168097	0.241505	-0.000313969	1	0.433064	0.000280277	0.213157	0.0869651	0.0904022	0.393375	0.0470617	0.736489	-0.167783	0.874232	0.219906	0.0902011	0.0433405	0.929843	0.0678428
AFLA_006320	0.0665068	0.853741	-0.0602517	0.886049	0.296484	0.0993054	0.283999	0.145385	-0.209724	0.184307	0.325146	0.0676246	0.126758	1	0.0124846	1	-0.53487	0.0237258	0.812661
AFLA_006330	0.690659	5.912e-06	0.593979	6.37627e-05	0.929441	1.48491e-09	0.503449	0.000196561	0.0559937	0.645071	0.306137	0.0121219	0.0966804	1	0.425991	0.00175992	-0.250143	0.154918	3.64844e-05
AFLA_006340	0.28342	0.509211	0.55551	0.141765	1.9353	1.0022e-07	0.656431	0.0492554	-0.512583	0.0594261	-0.4108	0.193303	-0.27209	1	1.27887	0.000277703	-0.101783	0.951328	4.23473e-14
AFLA_006350	-3.3964	1.35959e-20	-3.24744	3.8707e-20	-4.13984	8.23908e-25	-3.34437	1.98872e-21	-5.32104	2.88883e-29	-5.53473	3.41932e-28	-0.148958	1	-0.795467	8.70278e-06	0.213685	0.380696	0.0489231
AFLA_006360	-0.857713	0.000302153	-0.665115	0.00437669	-0.280879	0.169088	-0.328446	0.131856	-0.112853	0.55559	-0.0702826	0.78114	-0.192598	1	0.0475665	0.92859	-0.0425709	1	0.0132737
AFLA_006370	-0.120805	0.147454	0.0229762	0.889633	0.592433	8.9205e-11	0.257772	0.000621164	-0.152948	0.01151	-0.14646	0.0328633	-0.143781	0.572968	0.334661	3.31265e-05	-0.00648762	1	0.645512
AFLA_006380	0.293007	0.272018	0.23645	0.40489	1.17297	9.03359e-07	0.685337	0.00267284	0.177288	0.359115	0.428437	0.0421929	0.056557	1	0.487631	0.0383829	-0.251149	0.492796	0.796005
AFLA_006390	-0.257822	0.0925644	-0.292911	0.055158	-0.0816416	0.580263	-0.265609	0.0553649	-0.647885	5.31088e-07	-0.64358	5.08328e-06	0.0350888	1	0.183967	0.228068	-0.00430495	1	0.0656942
AFLA_006400	0.447599	0.000370306	0.479288	0.000166106	-0.0376407	0.787285	0.0690789	0.606341	-0.61049	3.75917e-08	-0.654802	1.07385e-07	-0.0316889	1	-0.10672	0.428822	0.0443126	0.910223	0.0464842
AFLA_006410	0.295424	0.0710405	0.400735	0.0132478	-0.390691	0.00513572	-0.487569	0.00119688	0.16866	0.169389	0.239962	0.0836658	-0.10531	1	0.0968787	0.61763	-0.0713022	0.865361	0.0699771
AFLA_006420	-0.197303	0.192656	-0.0647755	0.76264	0.603825	7.30682e-06	0.41506	0.00187673	0.0779876	0.504764	0.0258709	0.893693	-0.132527	0.992317	0.188765	0.189982	0.0521166	0.908574	0.735163
AFLA_006430	-0.0556066	0.772397	-0.108296	0.494248	0.500763	3.26391e-05	0.262299	0.0301405	-0.385875	0.000195547	-0.328566	0.00386966	0.0526898	1	0.238464	0.0584889	-0.0573096	0.86833	0.411799
AFLA_006440	0.447552	0.0177244	0.491426	0.00951753	0.805353	5.8702e-06	0.302272	0.085529	1.02096	6.13995e-09	1.04018	5.29049e-08	-0.0438738	1	0.503081	0.00520767	-0.0192236	1	0.595739
AFLA_006450	2.07083	0.0189078	2.68179	0.00255897	-0.0501944	1	0.751085	0.396699	-0.272002	0.732468	-0.198356	0.853273	-0.610966	1	-0.801279	0.400815	-0.0736467	1	0.0358295
AFLA_006460	-0.19994	0.680304	-0.617291	0.103299	-1.14541	0.000423106	-0.909819	0.00707352	-0.942791	0.000883403	-1.37822	3.82904e-05	0.417351	0.91812	-0.235588	0.58763	0.435432	0.398121	0.519537
AFLA_006470	-0.130484	0.551432	-0.162509	0.443068	0.0933911	0.602165	0.0369671	0.90474	-0.0884732	0.551549	-0.27067	0.0808269	0.0320251	1	0.056424	0.843334	0.182197	0.49934	0.503361
AFLA_006490	0.0354193	0.986461	-0.0562869	0.925337	1.30903	3.43376e-08	1.1315	1.59858e-06	0.751059	5.39685e-05	0.771241	0.000196553	0.0917061	1	0.177523	0.498367	-0.0201823	1	0.0895471
AFLA_006500	-0.719681	0.0272236	-0.654335	0.047751	0.254012	0.399286	0.391098	0.208051	0.444823	0.069226	0.206559	0.497067	-0.0653461	1	-0.137085	0.758862	0.238264	0.686373	0.00634937
AFLA_006520	-0.102704	0.455954	-0.193483	0.11694	-0.583523	5.21678e-07	-0.100952	0.397875	-0.321296	0.000521084	-0.539923	1.96886e-06	0.0907787	1	-0.482571	4.84669e-05	0.218626	0.132054	2.42942e-05
AFLA_006530	0.122844	0.519479	0.327908	0.0429055	1.44735	5.57379e-13	1.35724	1.12024e-11	0.238666	0.0466983	0.346323	0.0115375	-0.205065	0.859961	0.0901054	0.646635	-0.107656	0.722441	4.10113e-11
AFLA_006540	-0.890786	0.0100642	-0.775846	0.0265251	-1.81767	1.51822e-07	-1.26358	0.000136486	-0.345161	0.191874	-0.331974	0.280631	-0.114939	1	-0.554084	0.100321	-0.0131862	1	0.63814
AFLA_006550	-0.105615	0.462343	-0.0671906	0.695276	-0.419849	0.000153048	-0.37662	0.00109179	-0.734711	7.17328e-10	-0.775121	3.4079e-09	-0.0384244	1	-0.0432286	0.81422	0.0404098	0.928883	5.0123e-08
AFLA_006560	0.551297	0.000842531	0.61369	0.000250298	0.263962	0.0604139	-0.157002	0.328707	-0.63191	3.50831e-06	-0.579907	8.1907e-05	-0.0623938	1	0.420964	0.00660555	-0.0520033	0.931841	0.180949
AFLA_006570	-0.10736	0.666258	0.0866837	0.758194	-2.26146	3.58424e-16	-0.368736	0.034625	-0.0972042	0.530825	-0.166768	0.324928	-0.194043	0.950946	-1.89272	5.2933e-13	0.069564	0.907114	0.000756755
AFLA_006580	1.44759	1.62728e-10	1.27478	3.12267e-09	0.849069	8.9758e-07	0.788825	8.09079e-06	-0.695123	3.18814e-06	-0.62536	9.91166e-05	0.172815	0.976844	0.0602441	0.824627	-0.0697633	0.894772	0.211759
AFLA_006590	-0.429182	0.157457	-0.359384	0.256326	1.28806	3.19756e-06	0.71436	0.00773119	0.641785	0.00380219	0.757536	0.00273748	-0.0697976	1	0.573698	0.0393507	-0.115751	0.891663	0.362638
AFLA_006600	-0.630036	0.745248	-0.748045	0.695276	0.31464	0.858605	0.66862	0.66646	1.0246	0.340095	0.463121	0.749555	0.118009	1	-0.35398	0.889218	0.561476	0.886373	0.176625
AFLA_006610	-0.0437184	1	0.150043	0.785474	-0.0814529	0.859093	-0.157299	0.703525	-0.0573467	0.888905	-0.269662	0.407179	-0.193762	1	0.0758465	0.922943	0.212316	0.772143	0.636756
AFLA_006620	0.231253	0.172994	0.264363	0.115597	0.339539	0.0148633	-0.141101	0.383459	0.332662	0.00670302	-0.0696133	0.665576	-0.0331101	1	0.48064	0.00192652	0.402275	0.0302107	0.342438
AFLA_006630	-0.0227267	0.966144	0.00593461	1	-0.146435	0.190389	-0.2068	0.078897	-0.066702	0.519521	-0.140189	0.206291	-0.0286613	1	0.0603649	0.715613	0.073487	0.781499	1
AFLA_006640	-0.401918	0.00210767	-0.265457	0.0444076	-0.475674	5.84578e-05	-0.335735	0.00514343	-0.212855	0.0295386	-0.137219	0.230369	-0.136461	0.942711	-0.139939	0.301863	-0.0756363	0.780473	1
AFLA_006650	-0.138413	0.365545	-0.141216	0.360405	0.484019	9.10717e-05	-0.0185285	0.96152	-0.474402	2.03694e-05	-0.558007	1.13352e-05	0.00280316	1	0.502547	0.000177544	0.0836054	0.762805	0.0086672
AFLA_006660	0.486322	0.000951303	0.545959	0.000259119	0.589553	1.29507e-05	0.349893	0.00893421	0.76999	9.44973e-09	0.663066	1.82632e-06	-0.0596366	1	0.23966	0.0893528	0.106923	0.684824	0.276159
AFLA_006670	-0.200984	0.011947	-0.072038	0.444228	0.369363	1.59225e-06	0.177669	0.0158642	-0.0284151	0.684439	-0.113706	0.0997137	-0.128946	0.679129	0.191694	0.0117474	0.0852904	0.466687	0.212179
AFLA_006680	0.129122	0.818632	-0.0178667	1	0.293564	0.368792	0.54096	0.10354	0.0128741	1	0.337863	0.284742	0.146989	1	-0.247396	0.548045	-0.324989	0.561738	0.122866
AFLA_006690	0.483103	0.0523969	0.429794	0.0909099	0.742933	0.000643006	0.633827	0.00536826	0.134669	0.502453	0.428458	0.0426107	0.0533088	1	0.109106	0.743475	-0.293789	0.396779	0.00457153
AFLA_006700	0.146311	0.693082	0.0286302	1	0.210368	0.413247	0.463963	0.0706384	1.05194	4.8709e-06	1.09326	1.84541e-05	0.117681	1	-0.253595	0.39528	-0.0413285	1	0.0482245
AFLA_006710	0.166443	0.516058	-0.048183	0.940302	0.0932211	0.672624	-0.107023	0.657381	0.189159	0.25277	0.194243	0.310806	0.214626	0.961513	0.200244	0.386208	-0.00508417	1	0.314392
AFLA_006720	-0.381861	0.084969	-0.206098	0.412708	-0.262621	0.16974	0.187057	0.390497	-0.407301	0.0129697	-0.256789	0.175468	-0.175763	1	-0.449678	0.0301091	-0.150513	0.712121	0.667143
AFLA_006730	-3.38691	0.000737677	-4.29976	3.60479e-05	-2.79419	0.00126302	-2.61073	0.00426775	-3.56695	1.12899e-05	-3.25967	0.000221755	0.912846	0.992317	-0.183464	0.943662	-0.307275	0.936686	0.00188027
AFLA_006740	0.258115	0.372273	0.123698	0.74354	-1.32893	2.15328e-07	-0.955271	0.000111838	-1.06808	1.16231e-06	-0.610932	0.00607499	0.134417	1	-0.373655	0.141716	-0.45715	0.152139	0.031037
AFLA_006750	0.37184	0.0222633	0.351134	0.0326259	0.195772	0.171508	-0.0544437	0.792824	0.795066	4.9575e-08	0.934926	2.19321e-08	0.020706	1	0.250216	0.115159	-0.13986	0.596745	0.205403
AFLA_006760	-2.50421	2.71452e-10	-3.03269	2.33924e-12	-3.00549	1.42016e-13	-2.56356	3.27824e-11	0.262721	0.280081	0.181631	0.542594	0.528478	0.642541	-0.441932	0.156028	0.0810907	0.965466	1
AFLA_006770	-0.613311	0.0116771	-0.904683	0.000296485	-0.832397	0.000143288	-0.351976	0.12309	0.561053	0.00259301	0.351443	0.0941137	0.291372	0.893233	-0.480421	0.0392129	0.20961	0.596516	0.0261052
AFLA_006780	-0.251796	0.640284	-0.435659	0.354547	0.375161	0.321791	-0.0511511	0.971637	-0.772423	0.0141903	-0.567093	0.116524	0.183862	1	0.426312	0.332817	-0.20533	0.83463	1
AFLA_006790	0.0951977	0.800615	0.0600208	0.925148	0.194263	0.395261	-0.153874	0.556447	0.134372	0.503725	0.431101	0.0413831	0.0351769	1	0.348137	0.153539	-0.296728	0.389162	0.0149137
AFLA_006800	-0.435189	0.00272601	-0.390864	0.00718068	-0.104929	0.438348	-0.0286929	0.910308	-0.0460876	0.721734	0.0664011	0.64113	-0.0443252	1	-0.0762358	0.676291	-0.112489	0.656036	0.668035
AFLA_006810	0.190765	0.447322	0.217493	0.37975	0.730381	0.000176981	0.451801	0.0238367	0.395725	0.0156295	0.476548	0.0107273	-0.0267282	1	0.278579	0.204419	-0.080823	0.904694	0.673235
AFLA_006820	-0.095804	0.80566	0.0682067	0.90337	0.385195	0.0779503	-0.0205312	1	-1.00308	2.37101e-06	-0.815509	0.000285576	-0.164011	1	0.405726	0.098298	-0.187566	0.679034	0.753587
AFLA_006830	0.401089	0.0051576	0.65671	1.62275e-05	0.984309	4.95863e-10	0.865246	2.82631e-08	0.426567	0.000166668	0.639981	2.65739e-06	-0.255621	0.578922	0.119063	0.451209	-0.213414	0.248159	0.448424
AFLA_006840	0.0967044	0.58816	0.0381927	0.906373	0.232563	0.0607355	0.0279471	0.913249	0.0551552	0.655091	0.0916443	0.495155	0.0585117	1	0.204616	0.149617	-0.0364891	0.967473	0.26047
AFLA_006850	0.857115	0.0983022	0.949676	0.0663799	-0.343599	0.47232	-0.183308	0.769353	-0.0975853	0.854957	-0.178666	0.735287	-0.0925602	1	-0.160291	0.841103	0.0810807	1	0.912895
AFLA_006860	0.568115	1.81923e-07	0.620505	3.10947e-08	0.342772	8.59125e-05	0.452648	3.1369e-06	0.0885996	0.231165	0.202672	0.0142819	-0.05239	1	-0.109876	0.268157	-0.114072	0.400615	0.739733
AFLA_006870	-0.061627	0.690506	0.2827	0.0149075	0.776733	8.18168e-10	0.892484	1.17195e-10	0.632884	4.68604e-09	0.577202	3.59188e-07	-0.344327	0.107697	-0.11575	0.344282	0.0556816	0.841677	0.546628
AFLA_006880	0.196562	0.193457	0.251361	0.0882928	0.532064	4.7147e-05	0.687695	2.12364e-06	1.26985	3.55738e-14	1.04158	1.21312e-10	-0.0547992	1	-0.155632	0.296249	0.228277	0.207759	0.663208
AFLA_006890	0.681795	0.000170169	0.636225	0.000417923	1.38171	2.13329e-11	1.30316	3.19979e-10	1.39372	6.97524e-13	1.30211	8.34846e-11	0.0455703	1	0.0785481	0.741138	0.0916107	0.816889	4.79196e-08
AFLA_006900	-0.372009	0.00211579	-0.241712	0.0483429	-0.233147	0.0243844	-0.144706	0.208467	-0.0999678	0.282782	-0.317594	0.00242646	-0.130297	0.937188	-0.0884411	0.520449	0.217626	0.140808	0.000666239
AFLA_006910	-1.15191	0.25895	-1.65224	0.0894618	-1.35841	0.0977442	-0.768792	0.421535	-0.511389	0.50641	-0.287683	0.77966	0.500324	1	-0.589619	0.600028	-0.223706	0.976212	0.421433
AFLA_006920	1.1365	0.000368089	0.966582	0.00217684	1.14726	5.57512e-05	1.43096	4.72335e-06	1.4176	2.16701e-07	1.39204	2.77286e-06	0.169915	1	-0.283704	0.400883	0.0255659	1	0.769107
AFLA_006930	-0.288635	0.317331	-0.0873163	0.852916	0.269563	0.251507	0.450179	0.0644844	0.332599	0.0935217	0.535916	0.0174598	-0.201319	1	-0.180616	0.553678	-0.203318	0.657844	0.970148
AFLA_006940	0.677518	2.54722e-05	0.565001	0.000315953	0.0107588	1	-0.281467	0.0461848	0.792242	1.49506e-08	0.76618	3.32295e-07	0.112517	1	0.292226	0.0457862	0.0260617	1	0.000302806
AFLA_006950	-0.42473	0.0111532	-0.443439	0.00840102	-0.244134	0.0932045	-0.0675226	0.7341	0.341329	0.00719373	0.294487	0.0401806	0.0187093	1	-0.176612	0.314046	0.0468424	0.951977	0.0772312
AFLA_006960	-0.125854	0.380499	0.379339	0.00316098	0.866458	6.55425e-10	1.41778	1.1256e-14	1.06804	1.66411e-13	0.748368	1.49975e-08	-0.505193	0.0135352	-0.551322	2.04087e-05	0.31967	0.029206	0.0412509
AFLA_006970	-0.415601	0.231409	-0.111183	0.844479	0.112583	0.748463	0.358456	0.253251	0.393798	0.108723	0.337686	0.2379	-0.304417	0.987666	-0.245873	0.504624	0.0561119	1	0.142088
AFLA_006980	-0.283333	0.0816391	-0.245039	0.142571	-0.90608	3.13262e-08	-0.494997	0.000924584	0.246266	0.040234	0.243912	0.075763	-0.0382936	1	-0.411083	0.00677743	0.00235402	1	0.5969
AFLA_006990	0.301474	0.0629074	0.190199	0.278558	0.350954	0.0110947	0.494281	0.000968705	0.299834	0.0130614	0.293339	0.0324641	0.111275	1	-0.143327	0.410004	0.00649549	1	0.232542
AFLA_007000	-0.0646932	0.86966	-0.0740416	0.842216	0.777152	6.71447e-05	0.549179	0.00555577	0.726142	2.94186e-05	0.415187	0.0239698	0.0093484	1	0.227973	0.310063	0.310956	0.267094	0.176625
AFLA_007010	0.138922	0.481725	0.0598855	0.833063	0.106072	0.509402	-0.400877	0.00957661	-0.188018	0.139942	-0.327865	0.0228287	0.0790362	1	0.506949	0.00166053	0.139848	0.616852	0.194688
AFLA_007020	-0.0400695	0.964897	0.0301411	1	0.309373	0.108128	0.62533	0.00232744	1.23354	3.13552e-09	0.86987	2.00423e-05	-0.0702106	1	-0.315957	0.148439	0.363673	0.192016	0.496261
AFLA_007030	-0.377657	0.00033171	-0.143846	0.188944	0.858231	4.78869e-12	0.732844	7.8335e-10	0.170632	0.0275882	0.460454	2.5837e-06	-0.233811	0.327881	0.125387	0.232092	-0.289822	0.0128038	0.0109169
AFLA_007040	0.52579	0.00534225	0.375693	0.0503822	1.05793	3.98759e-08	1.04563	1.52379e-07	-1.09962	1.15044e-09	-1.12088	1.12417e-08	0.150097	1	0.0123038	1	0.0212574	1	0.00210179
AFLA_007050	0.264336	0.207295	0.392171	0.0513792	0.979534	4.42707e-07	1.07372	2.26852e-07	-0.841186	7.10626e-07	-0.53624	0.00186466	-0.127836	1	-0.0941864	0.71577	-0.304946	0.227169	0.0764007
AFLA_007060	-0.100175	0.674625	-0.129693	0.568626	0.151061	0.361866	0.0373292	0.903729	-0.185574	0.1782	-0.570994	0.000369551	0.0295181	1	0.113732	0.597631	0.385421	0.0726625	0.0850593
AFLA_007070	0.0588554	0.835632	0.0443624	0.912541	0.635227	5.1186e-05	0.618617	0.000162127	-0.831036	6.28927e-08	-0.682626	1.73288e-05	0.014493	1	0.0166095	1	-0.148411	0.595118	0.116925
AFLA_007080	-0.131566	0.430283	-0.174367	0.273177	-0.103608	0.447677	-0.378643	0.00478524	-0.385922	0.000636988	-0.607614	7.84124e-06	0.0428014	1	0.275035	0.0481895	0.221693	0.233571	0.0452564
AFLA_007090	0.406423	0.00793839	0.327332	0.0347247	0.581378	3.53397e-05	0.522528	0.000314738	0.0111864	0.980291	-0.0255403	0.906469	0.0790909	1	0.0588501	0.787716	0.0367267	0.975803	0.429757
AFLA_007100	0.106525	0.541942	0.0951507	0.610846	0.106623	0.429129	0.266253	0.0461017	0.212541	0.0504956	0.420871	0.000907008	0.0113747	1	-0.159631	0.286473	-0.20833	0.270709	3.15843e-11
AFLA_007110	0.0726724	0.745782	0.47365	0.00305142	0.285604	0.0365869	0.884836	1.37372e-07	-0.501644	7.65373e-05	-0.691458	4.02715e-06	-0.400978	0.227596	-0.599232	0.000125971	0.189814	0.3942	0.00204262
AFLA_007120	-0.0297925	0.947761	-0.0837093	0.677868	0.0400513	0.819317	0.0196676	0.963275	-0.613644	1.06373e-06	-0.463058	0.000399241	0.0539168	1	0.0203837	0.980615	-0.150586	0.492332	0.00239775
AFLA_007130	0.635996	0.681961	0.635996	0.695985	-0.389505	0.761568	-0.644183	0.615037	0.00402654	1	-0.173518	0.923553	3.55271e-15	1	0.254678	0.9204	0.177544	1	2.04384e-06
AFLA_007140	-0.185158	0.199872	-0.160162	0.285933	-0.244406	0.0375808	-0.368557	0.00354053	-0.923641	3.61337e-11	-0.486455	8.15887e-05	-0.0249958	1	0.124151	0.400398	-0.437186	0.00431951	0.0860343
AFLA_007150	-0.273422	0.114264	-0.250222	0.157508	0.0280162	0.917193	-0.25909	0.0987633	-0.900046	7.64539e-09	-0.662388	1.94896e-05	-0.0232003	1	0.287106	0.0768356	-0.237657	0.284089	0.967898
AFLA_007160	0.0761496	1	0.947723	0.565848	1.71627	0.134816	1.43046	0.261049	0.132258	0.951183	1.32655	0.253004	-0.871574	1	0.285813	0.9204	-1.19429	0.56529	0.741229
AFLA_007170	3.81759	1.86296e-11	2.83978	1.74984e-08	1.06187	0.00431166	0.763047	0.0545092	2.07363	6.28927e-08	2.50621	1.60317e-08	0.977807	0.326136	0.298821	0.547873	-0.43258	0.501707	0.23776
AFLA_007180	-0.246254	0.0751311	-0.272797	0.0487663	-0.175604	0.140291	-0.154286	0.239191	-0.268363	0.00916152	0.0426967	0.771341	0.0265431	1	-0.0213172	0.966606	-0.311059	0.0505875	0.781973
AFLA_007190	0.124685	0.198402	0.109955	0.273185	0.332473	6.60093e-05	0.348503	7.84395e-05	0.177528	0.0104188	0.315436	0.000128818	0.0147293	1	-0.0160299	0.952763	-0.137908	0.242405	0.0715747
AFLA_007200	0.221658	0.482247	0.0840957	0.867947	0.857035	0.00032973	0.399722	0.111383	-0.772853	0.000249913	-0.718068	0.0021213	0.137562	1	0.457313	0.0774101	-0.0547847	0.990496	0.331349
AFLA_007210	-0.338192	0.00343669	-0.169834	0.162432	-0.109317	0.292505	0.0608466	0.634381	0.0785182	0.389462	0.0754742	0.481988	-0.168357	0.763445	-0.170164	0.133214	0.00304396	1	2.13408e-26
AFLA_007220	-0.840994	0.0282962	-0.448633	0.285824	-0.134343	0.744654	-0.0883154	0.882625	0.392374	0.178665	0.920859	0.00531784	-0.39236	0.950946	-0.0460279	0.991291	-0.528485	0.300066	8.40202e-28
AFLA_007230	-0.496001	0.101749	-0.529777	0.0808411	0.140743	0.637071	-0.378438	0.176774	-0.93839	7.08407e-05	-0.216005	0.425238	0.0337759	1	0.519181	0.0678029	-0.722385	0.0337005	0.0108091
AFLA_007240	0.0377251	1	-0.014394	1	0.340651	0.220611	0.00698095	1	-0.674863	0.00456357	-0.237919	0.404374	0.0521191	1	0.33367	0.307666	-0.436944	0.292791	0.832119
AFLA_007250	0.171115	0.412817	0.0893812	0.737226	-0.213251	0.187785	-0.304337	0.0738151	-0.484417	0.000673192	-0.367458	0.0194785	0.0817339	1	0.0910856	0.701338	-0.116959	0.74555	0.791573
AFLA_007350	1.77636e-15	1	-1.77636e-15	1	3.55271e-15	1	8.88178e-16	1	0	1	-1.77636e-15	1	3.55271e-15	1	2.66454e-15	1	1.77636e-15	1	1
AFLA_007360	1.77636e-15	1	-1.77636e-15	1	3.55271e-15	1	8.88178e-16	1	0	1	-1.77636e-15	1	3.55271e-15	1	2.66454e-15	1	1.77636e-15	1	1
AFLA_007370	-1.20598	0.043843	-1.31457	0.028411	-1.48318	0.0039974	-0.548578	0.352264	1.73389	0.00021189	1.00076	0.0493882	0.108582	1	-0.934604	0.106248	0.73313	0.374993	0.0787946
AFLA_007380	-0.465309	0.728305	-0.592395	0.642896	-2.78725	0.00101358	-2.30874	0.00939915	0.762793	0.30908	0.776694	0.374397	0.127086	1	-0.478514	0.70188	-0.0139018	1	0.127502
AFLA_007390	1.77636e-15	1	-1.77636e-15	1	1.21366	0.194391	1.21366	0.232448	1.8277	0.0217719	1.51555	0.096825	3.55271e-15	1	2.66454e-15	1	0.312149	0.944019	1
AFLA_007400	-0.137455	1	0.505003	0.748968	-0.827876	0.405272	1.01994	0.335195	-0.14752	0.913306	0.839795	0.388613	-0.642458	1	-1.84782	0.0735837	-0.987315	0.557204	0.108165
AFLA_007410	1.77636e-15	1	-1.77636e-15	1	3.55271e-15	1	8.88178e-16	1	0	1	-1.77636e-15	1	3.55271e-15	1	2.66454e-15	1	1.77636e-15	1	0.000628755
AFLA_007420	1.77636e-15	1	-1.77636e-15	1	3.55271e-15	1	8.88178e-16	1	0	1	-1.77636e-15	1	3.55271e-15	1	2.66454e-15	1	1.77636e-15	1	1
AFLA_007430	-0.713516	0.483393	-2.02581	0.0200252	-9.05717	1.28802e-14	-8.18125	7.74888e-13	-4.57932	9.76225e-09	-4.57448	1.20915e-07	1.31229	0.733137	-0.875917	0.337715	-0.0048386	1	0.224882
AFLA_007440	0.440056	0.630369	0.958594	0.2105	-9.17153	4.78984e-17	-8.70302	9.35706e-16	-5.07295	1.0865e-11	-5.02162	2.7019e-10	-0.518539	1	-0.468512	0.577522	-0.0513232	1	3.64907e-10
AFLA_007450	-2.04813	0.017218	-2.95212	0.000740199	-6.96238	9.94279e-12	-6.49376	1.98813e-10	-2.06073	0.00180525	-2.59109	0.000632909	0.903982	0.942711	-0.468619	0.662841	0.530359	0.761059	3.35083e-05
AFLA_007460	-3.04521	3.07258e-12	-3.63616	2.70462e-14	-3.23708	2.87612e-14	-2.77531	6.41125e-12	-0.36654	0.128905	-0.813655	0.00326162	0.590951	0.539695	-0.46177	0.141716	0.447116	0.29033	0.410719
AFLA_007470	-2.83339	8.85973e-09	-3.7288	1.4566e-11	-6.67512	7.13543e-20	-5.98892	7.45295e-18	-2.20613	9.0737e-09	-2.62251	3.07615e-09	0.895415	0.386996	-0.686196	0.0888198	0.416385	0.505818	4.52586e-11
AFLA_007480	0.0749268	1	1.55152	0.276703	-5.34291	1.08345e-05	-4.03917	0.000917866	0.735604	0.485389	-2.40554	0.0309598	-1.4766	0.918211	-1.30374	0.344129	3.14114	0.0366458	1.86537e-13
AFLA_007490	6.61118	8.95786e-09	6.54335	1.16256e-08	-1.46382	0.0813849	-2.6923	0.00275316	0.205758	0.83367	1.45769	0.0807411	0.067823	1	1.22848	0.21126	-1.25194	0.345333	0.220524
AFLA_007500	1.77636e-15	1	-1.77636e-15	1	3.55271e-15	1	8.88178e-16	1	0	1	-1.77636e-15	1	3.55271e-15	1	2.66454e-15	1	1.77636e-15	1	1
AFLA_007510	1.77636e-15	1	-1.77636e-15	1	3.55271e-15	1	8.88178e-16	1	0	1	-1.77636e-15	1	3.55271e-15	1	2.66454e-15	1	1.77636e-15	1	1
AFLA_007520	-1.35254	0.155365	0.461934	0.723579	-3.69568	1.33949e-05	-2.96319	0.000561095	-1.00923	0.144995	-1.62614	0.0375843	-1.81447	0.468085	-0.732492	0.471819	0.616913	0.721871	1
AFLA_007530	-1.4938	1.15508e-05	-2.24055	5.20454e-09	-0.732412	0.00811431	-0.797842	0.00690721	-1.30269	1.57604e-06	-1.25838	2.02039e-05	0.746747	0.303689	0.0654303	0.92882	-0.0443035	1	0.550528
AFLA_007540	1.96044	5.05988e-11	1.7057	1.31683e-09	1.21646	1.22796e-07	1.22894	2.96146e-07	-2.22752	3.14183e-15	-2.18629	1.51585e-13	0.254739	0.926246	-0.0124793	1	-0.0412237	1	0.589747
AFLA_007550	1.77636e-15	1	-1.77636e-15	1	0.206223	0.833695	0.00821956	1	0.334343	0.623475	0.334343	0.678767	3.55271e-15	1	0.198003	0.898203	1.77636e-15	1	1
AFLA_007560	4.47785	9.5541e-05	4.36238	0.000142076	-0.761692	0.466347	-1.45345	0.16554	-6.98297	1.89586e-10	-6.92412	3.77473e-09	0.115475	1	0.691757	0.600028	-0.0588533	1	0.516344
AFLA_007570	0.774557	0.480269	-0.381478	0.793476	0.416381	0.662463	0.416381	0.700093	2.38032	0.000980695	2.98807	0.000320385	1.15603	0.878425	2.66454e-15	1	-0.607749	0.737112	0.176625
AFLA_007580	1.08918	0.202354	1.19639	0.159214	1.986	0.0045356	1.57005	0.0349038	3.7939	1.0953e-07	4.62245	2.40028e-08	-0.107217	1	0.415952	0.685759	-0.828551	0.488445	0.117511
AFLA_007590	1.77636e-15	1	-1.77636e-15	1	3.55271e-15	1	8.88178e-16	1	1.10253	0.0119726	1.10253	0.0267895	3.55271e-15	1	2.66454e-15	1	1.77636e-15	1	0.954505
AFLA_007600	-0.116901	0.786854	-0.245884	0.476023	3.34226	8.59812e-16	2.91767	1.39162e-13	-1.57667	5.0185e-09	-2.27511	1.81667e-11	0.128983	1	0.424588	0.13444	0.698442	0.0363261	0.0496872
AFLA_007610	-0.702055	0.654933	-1.2911	0.338251	-0.81477	0.474685	-1.38565	0.231164	1.91408	0.0348354	0.520517	0.664404	0.589046	1	0.570883	0.718062	1.39356	0.414446	0.176625
AFLA_007620	0.38124	0.263193	-0.062338	0.958868	0.339034	0.226766	0.00472024	1	1.89032	5.931e-10	1.87769	1.05148e-08	0.443578	0.79184	0.334314	0.310513	0.0126353	1	0.264958
AFLA_007630	-1.38354	0.024895	-1.85149	0.00284265	1.78892	0.000951682	2.12197	0.00027764	-0.178169	0.75197	0.944517	0.0746429	0.467948	1	-0.333048	0.665739	-1.12269	0.13675	9.91622e-11
AFLA_007640	-4.43939	4.88705e-18	-5.21162	5.53593e-20	-5.54446	2.01438e-22	-4.9999	2.22982e-20	-3.5406	3.06878e-18	-3.38618	3.61219e-16	0.772234	0.174163	-0.544561	0.0454546	-0.154427	0.80513	4.65013e-07
AFLA_007650	-0.630611	0.203024	-0.0510305	1	0.136775	0.799734	-0.0506725	0.98289	0.262727	0.488561	0.552262	0.176069	-0.579581	0.878137	0.187447	0.776544	-0.289535	0.759466	0.0695669
AFLA_007660	-0.104962	0.855893	-1.001	0.00254348	-0.227207	0.464387	0.035593	0.982945	0.447256	0.0711763	1.09304	0.000201783	0.896033	0.173958	-0.2628	0.47403	-0.645783	0.101223	0.0680268
AFLA_007670	-0.908016	0.446764	-0.711813	0.588586	-0.350557	0.755615	-1.1315	0.25737	3.98178	3.89644e-06	2.11765	0.0168428	-0.196203	1	0.78094	0.50517	1.86413	0.141565	1.0121e-05
AFLA_007680	1.00886	0.494388	1.00886	0.506355	-1.89833	0.0790676	-0.461471	0.763745	1.08885	0.258073	0.530072	0.670632	2.66454e-15	1	-1.43685	0.263523	0.558781	0.862845	0.00666005
AFLA_007690	2.66454e-15	1	-8.88178e-16	1	1.00454	0.26809	0.450767	0.700078	-1.02237	0.185144	-0.418869	0.679671	3.55271e-15	1	0.553771	0.659891	-0.6035	0.771071	1
AFLA_007700	0.601507	0.311492	-0.283848	0.710994	-0.640661	0.17973	-0.540215	0.30964	2.72788	2.76016e-08	2.94158	7.1284e-08	0.885355	0.669032	-0.100446	0.943737	-0.213696	0.89353	1
AFLA_007710	-0.73645	0.51704	0.966903	0.370867	-3.07983	0.000284704	-1.75041	0.0467226	0.308371	0.716591	1.813	0.0262937	-1.70335	0.576781	-1.32942	0.158914	-1.50463	0.213324	0.0739475
AFLA_007720	3.1631	2.48871e-10	3.66925	6.30797e-12	1.85808	1.19356e-06	2.566	6.48845e-09	-3.73303	7.1984e-15	-1.8911	8.18642e-07	-0.506145	0.862988	-0.70792	0.0630678	-1.84193	4.33578e-05	0.435549
AFLA_007730	0.63604	0.630328	-0.0757731	1	-1.62874	0.067846	-2.03592	0.032342	-6.58709	1.41955e-10	-5.92615	2.27994e-08	0.711813	1	0.407176	0.780485	-0.660933	0.744183	0.0267643
AFLA_007740	-0.524306	0.644453	0.503572	0.673484	4.55742	1.88659e-07	0.902823	0.292925	4.20925	7.58894e-08	6.37679	1.29629e-10	-1.02788	0.905715	3.6546	3.54175e-05	-2.16753	0.0321011	0.820342
AFLA_007750	0.36575	0.829115	0.360267	0.842216	1.92053	0.0325955	0.884681	0.39943	1.54908	0.0486807	0.0913648	0.977316	0.00548238	1	1.03585	0.349646	1.45771	0.293524	0.820342
AFLA_007760	-1.03111	2.80592e-05	-0.816067	0.000620172	0.0725074	0.783361	-0.0501498	0.897598	-0.797289	2.67545e-05	-0.304213	0.133872	-0.215047	0.993916	0.122657	0.679027	-0.493076	0.0770085	1.30672e-08
AFLA_007770	-0.0868722	0.635822	-0.00662824	1	0.0563854	0.706152	0.11101	0.446182	0.0644688	0.587998	-0.189458	0.125249	-0.080244	1	-0.0546251	0.788727	0.253927	0.150018	0.00104275
AFLA_007780	-0.726821	3.00433e-05	-0.378239	0.0235583	0.483739	0.000907786	0.428929	0.00506594	-0.781069	1.04947e-07	-0.868686	1.4349e-07	-0.348582	0.412821	0.0548097	0.830794	0.0876173	0.812394	0.383024
AFLA_007790	0.413096	0.0226627	0.583898	0.00143746	1.2591	3.81456e-10	0.977661	2.567e-07	-0.873398	6.61875e-08	-0.911848	3.07035e-07	-0.170803	0.987666	0.281442	0.11125	0.0384492	0.988353	0.47267
AFLA_007800	0.11281	0.413982	0.0578489	0.744649	0.458157	3.7038e-05	0.322323	0.00402397	0.153371	0.0935119	-0.0461177	0.710184	0.0549606	1	0.135834	0.278312	0.199488	0.191313	0.000502395
AFLA_007810	0.874778	0.274761	2.58733	0.000584982	-11.6348	1.21765e-19	-10.8864	4.04666e-18	-9.64448	8.35872e-19	-9.47199	4.76268e-17	-1.71256	0.309035	-0.748412	0.336717	-0.172484	0.977066	0.790799
AFLA_007820	0.613315	0.226802	0.447244	0.417328	-7.28365	2.6282e-19	-6.51488	3.26089e-17	-6.63197	1.31698e-19	-6.87428	1.77189e-18	0.166071	1	-0.768771	0.0962088	0.242307	0.82303	1.14348e-06
AFLA_007830	0.151382	0.748914	0.425754	0.237664	-7.82099	1.04813e-24	-7.15971	6.35786e-23	-7.26945	2.23827e-25	-7.6658	1.9664e-24	-0.274372	1	-0.661283	0.0381151	0.39635	0.397738	0.0379167
AFLA_007840	0.100659	0.832586	-0.275903	0.412825	-3.44139	4.70695e-16	-2.70702	1.18674e-12	-1.70416	1.04196e-09	-2.10001	1.4582e-10	0.376562	0.853909	-0.734373	0.00801286	0.395843	0.309869	6.68903e-13
AFLA_007850	-2.26394	0.00391048	-1.86749	0.0178154	-6.22992	1.53901e-11	-4.75105	2.59412e-08	-4.42692	2.33041e-09	-4.82408	5.23199e-09	-0.396447	1	-1.47887	0.0487273	0.397159	0.824179	4.29249e-12
AFLA_007860	-0.752737	4.09487e-07	-0.564451	5.27927e-05	-3.80621	2.83113e-27	-3.2304	2.16377e-24	-2.67645	2.51293e-24	-2.95619	5.09648e-24	-0.188286	0.79147	-0.575807	2.02901e-05	0.279741	0.0782236	1.65725e-06
AFLA_007870	-2.96888	1.70632e-10	-2.83851	5.00447e-10	-5.8109	9.96565e-20	-5.58869	1.51595e-18	-3.19324	5.45839e-14	-3.29052	6.70596e-13	-0.13037	1	-0.22221	0.613398	0.0972765	0.960679	0.0789429
AFLA_007880	2.66454e-15	1	-0.665952	0.575115	-0.73078	0.401616	-0.383237	0.730458	-1.15584	0.103637	-2.43019	0.00291451	0.665952	1	-0.347544	0.799527	1.27435	0.312208	1
AFLA_007890	-0.2801	0.107531	-0.202855	0.273315	0.164075	0.280672	0.000815443	1	-0.550913	5.07481e-05	-0.459631	0.00183908	-0.0772456	1	0.16326	0.365423	-0.091282	0.808405	0.657691
AFLA_007900	-0.436816	0.0018433	-0.785801	4.31125e-07	0.697535	3.64455e-07	-0.199621	0.126648	-0.449716	5.71405e-05	-0.508964	5.77655e-05	0.348985	0.23439	0.897156	1.28553e-08	0.059248	0.876054	0.737884
AFLA_007910	0.0552796	0.905826	0.316953	0.163206	0.31327	0.094151	-0.17326	0.427998	-0.546485	0.00103035	-0.464857	0.0120673	-0.261673	0.889346	0.48653	0.0173958	-0.0816278	0.901253	1
AFLA_007920	-0.412986	0.012855	-0.303832	0.0745748	0.0640237	0.714453	-0.216155	0.169799	-1.2189	4.88132e-12	-1.05366	2.77282e-09	-0.109155	1	0.280178	0.0811381	-0.165238	0.510961	0.357348
AFLA_007930	-0.44248	0.130085	0.0321006	1	-0.0989596	0.745291	-0.423188	0.109085	-0.0658993	0.810675	-0.25781	0.305796	-0.47458	0.642541	0.324229	0.264284	0.191911	0.719616	0.041212
AFLA_007940	-0.320795	0.683888	-0.500398	0.480678	-0.331323	0.568726	-0.143731	0.87295	0.510278	0.26381	0.162004	0.808592	0.179603	1	-0.187592	0.841103	0.348274	0.777304	0.00342435
AFLA_007950	-0.462418	0.069761	-0.449847	0.081447	0.260067	0.246656	0.223261	0.372842	0.0651711	0.783128	0.260103	0.240269	-0.0125704	1	0.0368058	0.973699	-0.194932	0.656855	1.40393e-05
AFLA_007960	-1.56551	0.0116121	-0.705075	0.304835	0.0436665	1	0.501623	0.425328	-0.0638468	0.949046	0.0751621	0.946371	-0.860438	0.806846	-0.457956	0.518142	-0.139009	0.981754	0.971125
AFLA_007970	-0.454584	0.0906342	-0.495105	0.065421	-1.24008	1.07978e-06	-0.443989	0.0685509	0.671117	0.000960045	0.0348743	0.936896	0.0405211	1	-0.796094	0.00161323	0.636243	0.0359874	0.353976
AFLA_007980	0.0627128	1	-0.809527	0.284796	0.800471	0.188156	0.758756	0.254605	0.811933	0.119043	0.114015	0.907462	0.87224	0.868178	0.0417152	1	0.697917	0.497961	1
AFLA_007990	-0.0946366	0.933195	0.0206406	1	1.87337	3.86363e-06	0.812512	0.0396395	2.56457	6.21141e-10	2.57902	8.43448e-09	-0.115277	1	1.06086	0.00922604	-0.0144487	1	0.421433
AFLA_008000	1.77636e-15	1	-1.77636e-15	1	3.55271e-15	1	8.88178e-16	1	0	1	-1.77636e-15	1	3.55271e-15	1	2.66454e-15	1	1.77636e-15	1	1
AFLA_008010	1.77636e-15	1	-1.77636e-15	1	3.55271e-15	1	8.88178e-16	1	0	1	-1.77636e-15	1	3.55271e-15	1	2.66454e-15	1	1.77636e-15	1	1
AFLA_008020	-0.663702	0.584547	-8.88178e-16	1	-0.380688	0.711467	-1.37547	0.134824	0.201531	0.840362	0.468069	0.624008	-0.663702	1	0.99478	0.334969	-0.266538	0.956337	1
AFLA_008030	-0.535218	0.822089	-0.669405	0.764356	0.364917	0.844062	0.322569	0.895793	1.22478	0.288203	1.82027	0.160774	0.134187	1	0.0423481	1	-0.595486	0.891199	1
AFLA_008040	0.0309603	1	0.00828109	1	0.981691	0.000618026	1.02575	0.000756098	1.40978	4.9085e-07	1.13075	0.000110218	0.0226792	1	-0.0440622	0.981969	0.279031	0.597342	1
AFLA_008050	-1.33755	0.282867	-0.618735	0.698714	-0.253639	0.865881	1.08939	0.335347	0.780924	0.388376	0.086042	0.9887	-0.718818	1	-1.34303	0.252148	0.694882	0.765121	0.176625
AFLA_008060	0.413224	0.831682	-1.27091	0.340416	0.191144	0.922349	0.571832	0.671512	0.503145	0.616789	1.66108	0.106268	1.68413	0.79147	-0.380688	0.838639	-1.15793	0.525748	0.907063
AFLA_008070	-1.47427	0.348448	-2.48247	0.0885386	0.359459	0.835831	1.36372	0.328899	1.42001	0.188525	-0.39738	0.801731	1.0082	1	-1.00426	0.53817	1.81739	0.349377	0.176625
AFLA_008080	1.77636e-15	1	-1.77636e-15	1	3.55271e-15	1	8.88178e-16	1	0	1	-1.77636e-15	1	3.55271e-15	1	2.66454e-15	1	1.77636e-15	1	1
AFLA_008090	2.66454e-15	1	-8.88178e-16	1	-1.45517	0.054353	-0.717489	0.418823	-3.11952	1.39179e-05	-3.16826	6.71123e-05	3.55271e-15	1	-0.737684	0.444577	0.0487379	1	1
AFLA_008100	2.66454e-15	1	-0.711813	0.142782	-4.20085	5.88534e-13	-3.42892	3.28376e-10	-6.24494	3.59674e-19	-6.92001	7.24281e-19	0.711813	0.722021	-0.771933	0.0860608	0.675077	0.264198	1
AFLA_008110	-1.96658	0.132743	-0.91651	0.563072	-0.421851	0.760342	1.18117	0.344801	-0.340069	0.772695	-0.733352	0.539124	-1.05007	1	-1.60302	0.209805	0.393283	0.936123	1
AFLA_008120	-1.31321	6.49816e-06	-1.55319	3.36321e-07	-1.00828	4.83111e-05	-0.656814	0.00869295	-0.901651	3.89256e-05	-1.09649	1.35584e-05	0.239979	0.997216	-0.351469	0.199754	0.19484	0.696224	0.541053
AFLA_008130	-3.25059	0.000136426	-3.0145	0.000369508	-2.1095	0.00328193	-2.3449	0.00222594	1.67952	0.00727671	1.17133	0.100167	-0.236095	1	0.2354	0.866012	0.508187	0.761634	0.00194319
AFLA_008140	1.77636e-15	1	-1.77636e-15	1	3.55271e-15	1	8.88178e-16	1	-1.3896	0.0123542	-1.77636e-15	1	3.55271e-15	1	2.66454e-15	1	-1.3896	0.118667	0.0819963
AFLA_008150	-0.97457	0.0596505	-0.764822	0.154946	-2.67051	1.64202e-07	-2.13296	2.07409e-05	0.689395	0.0735452	0.617407	0.166175	-0.209748	1	-0.537549	0.315783	0.0719885	1	0.993749
AFLA_008160	-0.94544	0.265747	-0.38997	0.730233	-2.205	0.00134523	-1.67068	0.0207546	1.07884	0.0680927	0.545187	0.451534	-0.55547	1	-0.534319	0.5597	0.533656	0.719616	1
AFLA_008170	-2.01468	0.00729353	-1.384	0.0723412	-1.71396	0.00830814	-2.10922	0.00249585	0.573513	0.327997	0.0742524	0.966218	-0.630679	1	0.395261	0.677114	0.499261	0.727972	0.421872
AFLA_008180	-0.663221	0.00115222	-0.539305	0.00777453	1.05571	1.59067e-07	0.824552	2.8228e-05	0.191999	0.213983	0.242399	0.168125	-0.123916	1	0.231154	0.265346	-0.0503998	0.971281	0.739733
AFLA_008190	-1.05455	2.55128e-07	-0.622778	0.000767814	1.08587	1.11601e-08	0.846068	3.72078e-06	0.0705838	0.651213	0.818802	2.35214e-06	-0.43177	0.288541	0.239797	0.189427	-0.748218	0.000256808	0.730447
AFLA_008200	0.674377	0.428535	0.457551	0.641192	0.122042	0.918798	0.846044	0.236147	2.45545	4.07601e-05	2.59936	0.000103019	0.216826	1	-0.724001	0.359759	-0.143905	0.996078	0.568627
AFLA_008210	1.59848	1.04005e-06	1.49412	3.57874e-06	0.173487	0.548569	0.0717787	0.873859	2.2775	1.64844e-12	2.07791	3.13811e-10	0.104361	1	0.101708	0.82212	0.199589	0.724465	0.0397284
AFLA_008220	0.515086	0.0206649	0.728848	0.00121196	0.915213	1.04556e-05	0.853717	6.89767e-05	1.08597	5.16025e-08	0.705251	0.000355528	-0.213763	0.980714	0.0614964	0.873887	0.380718	0.169832	0.787993
AFLA_008230	-0.383345	0.779034	0.47827	0.715057	0.365365	0.705465	-0.178682	0.913936	4.23049	1.78602e-07	3.45344	4.13502e-05	-0.861615	0.988333	0.544047	0.627698	0.777056	0.608885	1
AFLA_008240	0.103012	0.313172	0.228427	0.0145402	0.419342	2.39592e-06	0.517455	1.44629e-07	-0.143235	0.0407429	-0.0274004	0.789284	-0.125415	0.824628	-0.0981136	0.314046	-0.115835	0.369906	0.504136
AFLA_008250	-0.394148	3.95579e-05	-0.349532	0.000213061	-0.193986	0.0140275	-0.437509	2.33377e-06	-0.184117	0.00795369	-0.193264	0.013946	-0.0446165	1	0.243524	0.00528832	0.00914701	1	0.857316
AFLA_008260	1.77636e-15	1	-1.77636e-15	1	0.766808	0.0268184	0.766808	0.0389453	0	1	-1.77636e-15	1	3.55271e-15	1	2.66454e-15	1	1.77636e-15	1	0.0219906
AFLA_008270	0.36965	0.347208	0.157516	0.767617	0.0779634	0.867227	0.315572	0.371414	0.162822	0.580828	0.168653	0.625701	0.212133	1	-0.237609	0.567054	-0.00583115	1	0.176889
AFLA_008280	-1.63204	0.105351	-0.207953	0.949409	0.44775	0.653518	-1.7894	0.0482979	0.866294	0.25121	0.245302	0.829768	-1.42409	0.768167	2.23715	0.0162692	0.620991	0.748838	2.96747e-11
AFLA_008290	0.317253	0.0382147	0.533721	0.000581139	0.174774	0.193849	0.444745	0.00169949	-0.597059	2.92503e-06	-0.362212	0.00582494	-0.216469	0.785894	-0.269971	0.0652777	-0.234847	0.227069	0.557288
AFLA_008300	0.17749	0.218611	0.294933	0.0311804	0.570347	7.28056e-06	0.354171	0.00465531	-0.597658	3.67208e-07	-0.465003	0.000133252	-0.117444	1	0.216176	0.101074	-0.132655	0.521132	0.38989
AFLA_008310	-0.086078	0.76816	0.322547	0.122808	-0.563439	0.00136069	0.0754921	0.757947	0.525872	0.000740739	0.340404	0.0480702	-0.408625	0.441422	-0.638931	0.000943942	0.185468	0.556539	0.000680322
AFLA_008320	0.263352	0.315779	0.293976	0.258908	-0.0211875	0.988108	0.241742	0.3019	0.305673	0.0902264	-0.0256642	0.958527	-0.0306244	1	-0.262929	0.289442	0.331338	0.298881	6.37409e-06
AFLA_008330	-0.00054954	1	-0.0425605	0.897345	0.350867	0.00808198	0.0136775	0.998198	0.00206368	1	-0.085873	0.556499	0.042011	1	0.33719	0.0207756	0.0879366	0.785763	0.137544
AFLA_008340	0.189922	0.463103	0.281718	0.241919	0.289312	0.13635	-0.317275	0.128358	0.121742	0.500998	0.0628901	0.799766	-0.0917955	1	0.606587	0.0042598	0.0588518	0.961464	0.621704
AFLA_008350	1.47539	0.000628412	1.04044	0.0146969	1.72401	1.28128e-05	1.4545	0.000297301	3.36543	6.69925e-13	3.38716	1.34399e-11	0.434955	0.951036	0.269509	0.59381	-0.0217375	1	3.33779e-09
AFLA_008360	-0.164268	0.6983	-0.969369	0.00228437	0.333525	0.235011	0.317636	0.303136	1.10575	1.70172e-05	0.963837	0.000532571	0.805101	0.217314	0.0158888	1	0.141911	0.86107	1
AFLA_008370	0.61338	0.0260286	0.568238	0.0418057	0.217086	0.394069	0.202501	0.476101	0.918634	3.5463e-05	0.669803	0.00484879	0.0451416	1	0.0145848	1	0.248831	0.567752	0.143634
AFLA_008380	-0.220994	0.213422	-0.162047	0.399094	0.774774	1.47901e-06	0.449143	0.00368353	-0.269051	0.0324947	-0.329747	0.0213941	-0.0589476	1	0.325631	0.0419116	0.0606962	0.908574	1
AFLA_008390	-0.37528	0.00191499	-0.568756	9.70075e-06	-0.138454	0.192215	-0.269352	0.0148443	-0.0971235	0.297024	-0.054147	0.64794	0.193476	0.679573	0.130898	0.294972	-0.0429765	0.911273	0.864855
AFLA_008400	-1.20351	0.181522	-1.77636e-15	1	-0.381004	0.663065	8.88178e-16	1	-0.934771	0.150286	-0.839967	0.268747	-1.20351	0.793506	-0.381004	0.741532	-0.0948042	1	1
AFLA_008410	0.665895	0.566788	-0.411792	0.774872	2.40753	0.00344947	1.03898	0.257014	1.26698	0.0759799	1.76808	0.0294428	1.07769	0.91812	1.36855	0.14312	-0.501101	0.812331	0.674826
AFLA_008420	1.77636e-15	1	-1.77636e-15	1	-0.381004	0.675288	-0.383237	0.710414	2.16856	0.00144424	2.86694	0.000273624	3.55271e-15	1	0.00223229	1	-0.698379	0.647777	0.00747826
AFLA_008430	-0.812734	0.522852	-1.46008	0.19839	-1.36541	0.142614	-0.630745	0.580636	1.12898	0.163153	1.12898	0.22778	0.647347	1	-0.734669	0.551702	1.77636e-15	1	1
AFLA_008440	1.77636e-15	1	-1.77636e-15	1	3.55271e-15	1	-0.644149	0.318394	-0.934771	0.0584407	-1.77636e-15	1	3.55271e-15	1	0.644149	0.356114	-0.934771	0.279647	1
AFLA_008450	0.718638	0.0185563	0.112698	0.822348	0.332374	0.220873	0.558788	0.0476086	1.01942	3.56228e-05	0.8741	0.00108655	0.60594	0.468933	-0.226414	0.515605	0.145317	0.844462	0.730516
AFLA_008460	0.287634	0.410105	-0.124722	0.794606	0.233274	0.413432	-0.652845	0.0207266	0.186501	0.448843	-0.445499	0.0921128	0.412356	0.826156	0.886119	0.00254585	0.632	0.0847359	8.90527e-05
AFLA_008470	-0.0801677	1	1.49469	0.361721	0.182471	0.954458	-0.464747	0.805556	-0.054238	1	1.02347	0.443955	-1.57485	0.936177	0.647218	0.740888	-1.07771	0.679034	0.833312
AFLA_008480	-0.494276	0.0459542	-0.227327	0.427439	-0.751058	0.000546332	-0.295439	0.208051	-1.37019	3.09404e-09	-1.6734	5.475e-10	-0.266949	0.93585	-0.455619	0.0529326	0.303205	0.374993	0.0881426
AFLA_008490	-0.0550296	0.889891	0.0346855	0.973328	-0.0357212	0.905311	0.537308	0.00356257	0.113507	0.481203	-0.22436	0.197969	-0.0897152	1	-0.573029	0.00264749	0.337868	0.174105	0.00414879
AFLA_008500	-0.11768	0.532939	-0.0347746	0.942407	-0.219291	0.108277	-0.194182	0.193646	-0.223369	0.0585498	-0.291956	0.0298818	-0.0829053	1	-0.0251091	0.964469	0.0685874	0.868028	0.235605
AFLA_008510	-0.156676	0.976555	-1.03241	0.325756	-2.17709	0.00754505	-1.57729	0.0714826	-0.69348	0.347811	-0.481899	0.596237	0.875738	0.99062	-0.599808	0.593102	-0.211582	0.981681	0.820342
AFLA_008520	-0.692421	0.000873069	-0.513766	0.0126351	0.771452	4.00464e-05	1.13589	1.56391e-07	-0.284968	0.0651604	-0.538579	0.00254111	-0.178655	1	-0.364438	0.0648962	0.253611	0.374694	1
AFLA_008530	-0.516531	0.00106658	-0.558533	0.00046017	-1.10506	2.43567e-10	-0.690131	8.18729e-06	-0.163945	0.167425	-0.373808	0.00551834	0.0420019	1	-0.414925	0.00526799	0.209863	0.316265	0.927815
AFLA_008550	-1.00154	0.0666879	-0.609351	0.307249	-1.33446	0.00429529	-0.26579	0.661262	0.580203	0.15646	0.215807	0.691923	-0.392189	1	-1.06867	0.0382083	0.364396	0.72178	1
AFLA_008560	-0.551123	0.280736	-0.219031	0.752636	-1.20669	0.00313117	-0.914052	0.0348722	-1.08118	0.00262369	-0.846696	0.0353475	-0.332092	1	-0.292642	0.601092	-0.23448	0.829313	0.388389
AFLA_008570	1.77636e-15	1	-1.77636e-15	1	-0.49813	0.483236	8.88178e-16	1	1.05946	0.0604448	2.52739	0.000166405	3.55271e-15	1	-0.49813	0.570936	-1.46793	0.101857	1
AFLA_008580	1.77636e-15	1	-1.77636e-15	1	3.55271e-15	1	8.88178e-16	1	0	1	-1.77636e-15	1	3.55271e-15	1	2.66454e-15	1	1.77636e-15	1	0.160616
AFLA_008590	-0.943128	0.0183941	-0.182748	0.759134	-0.756509	0.027953	-0.460247	0.230978	-0.556434	0.0648662	-0.401942	0.255777	-0.760379	0.511793	-0.296262	0.516433	-0.154492	0.897496	1
AFLA_008600	0.47713	0.0163688	0.728225	0.000355925	2.48869	9.64452e-17	1.72634	6.77801e-12	0.340526	0.0229186	0.0263186	0.937142	-0.251094	0.869005	0.76235	0.000103586	0.314207	0.213298	0.440117
AFLA_008610	-0.251535	0.951672	0.656481	0.717179	1.82035	0.100346	0.942394	0.473618	-0.7432	0.469802	0.451318	0.734604	-0.908016	1	0.877952	0.552897	-1.19452	0.548772	0.0219998
AFLA_008620	0.482708	0.032748	0.673745	0.00297846	0.425892	0.0278799	-0.245895	0.259438	0.986497	4.15432e-07	1.40472	3.95166e-09	-0.191037	1	0.671787	0.00184645	-0.418227	0.127391	0.0906936
AFLA_008630	-0.741269	0.332682	-0.814705	0.284184	-0.420114	0.529303	-0.349325	0.652412	-2.84429	1.33548e-06	-2.47937	7.63606e-05	0.0734362	1	-0.0707881	1	-0.364918	0.813093	0.0142238
AFLA_008640	-1.95808	2.14489e-05	-1.6537	0.000235505	-0.0830154	0.894699	0.147691	0.789681	-1.70854	3.06269e-06	-1.80645	9.23248e-06	-0.30438	1	-0.230706	0.675007	0.097906	0.981681	0.756499
AFLA_008650	0.260132	0.896496	0.923834	0.410273	-1.90124	0.0227644	0	1	-1.23747	0.0909328	0.689166	0.440547	-0.663702	1	-1.90124	0.0406219	-1.92664	0.0970219	0.936732
AFLA_008660	-2.4199	0.00376012	-2.75475	0.00111705	-2.51296	0.000639285	-2.50283	0.00129848	0.41334	0.547269	0.193684	0.846476	0.334845	1	-0.0101375	1	0.219657	0.961688	1
AFLA_008670	1.77636e-15	1	-1.77636e-15	1	3.55271e-15	1	8.88178e-16	1	0	1	-1.77636e-15	1	3.55271e-15	1	2.66454e-15	1	1.77636e-15	1	1
AFLA_008680	1.77636e-15	1	-1.77636e-15	1	3.55271e-15	1	8.88178e-16	1	0	1	-1.77636e-15	1	3.55271e-15	1	2.66454e-15	1	1.77636e-15	1	1
AFLA_008690	-1.45755	0.198141	-2.65796	0.0134617	-0.503961	0.641852	-1.83763	0.0640927	-2.06362	0.010783	-1.23187	0.188143	1.20041	0.922515	1.33367	0.220676	-0.831752	0.656514	1
AFLA_008700	1.77636e-15	1	-1.77636e-15	1	3.55271e-15	1	8.88178e-16	1	0	1	-1.77636e-15	1	3.55271e-15	1	2.66454e-15	1	1.77636e-15	1	1
AFLA_008710	1.77636e-15	1	-1.77636e-15	1	3.55271e-15	1	8.88178e-16	1	0	1	-1.77636e-15	1	3.55271e-15	1	2.66454e-15	1	1.77636e-15	1	1
AFLA_008720	0.139916	0.573848	0.35969	0.0830361	-1.15805	2.51131e-08	-0.833214	2.42716e-05	0.801556	2.37644e-06	1.00425	3.84411e-07	-0.219774	0.93585	-0.324835	0.0978926	-0.202693	0.504125	1
AFLA_008730	-2.57428	0.0209988	-0.22599	0.955973	-1.24345	0.208434	-1.14505	0.292942	-0.613707	0.498567	1.14824	0.242975	-2.34829	0.411981	-0.0984022	1	-1.76194	0.213238	0.670121
AFLA_008740	-2.66311	0.00100599	-2.49774	0.00197705	-2.53931	0.000353727	-1.14961	0.125452	-0.999709	0.0977251	-0.514409	0.49097	-0.165376	1	-1.38971	0.0711012	-0.4853	0.765121	0.378479
AFLA_008750	1.24847	0.00124008	0.601408	0.132248	2.0568	9.40654e-08	1.02482	0.00378813	0.73188	0.011365	1.49441	2.22272e-05	0.647059	0.637429	1.03198	0.00468437	-0.762533	0.0959811	0.820342
AFLA_008760	-1.00802	0.157065	-0.848359	0.252885	-0.706084	0.247153	-0.452868	0.52693	1.19635	0.0199492	1.25421	0.0319863	-0.159664	1	-0.253216	0.798895	-0.0578606	1	0.911796
AFLA_008770	-5.60526	6.38556e-08	-3.55411	0.000142473	-4.21269	1.3074e-06	-3.18345	0.000208294	-0.431402	0.563721	-0.243275	0.812387	-2.05116	0.327881	-1.02923	0.268029	-0.188127	0.989047	0.0169705
AFLA_008780	-7.92936	6.62117e-08	-6.24396	5.77324e-06	-5.186	1.31291e-05	-3.87475	0.0011827	-0.969999	0.331407	-2.34073	0.0326604	-1.6854	0.840617	-1.31125	0.330167	1.37073	0.463264	0.135301
AFLA_008790	-7.01813	7.87097e-11	-5.71519	8.95186e-09	-5.17546	5.18591e-09	-3.81443	5.12188e-06	-0.42723	0.53381	0.507541	0.519674	-1.30294	0.70818	-1.36102	0.0942155	-0.934771	0.436589	1
AFLA_008800	1.77636e-15	1	-1.77636e-15	1	3.55271e-15	1	8.88178e-16	1	0	1	-1.77636e-15	1	3.55271e-15	1	2.66454e-15	1	1.77636e-15	1	1
AFLA_008810	1.77636e-15	1	-1.77636e-15	1	3.55271e-15	1	8.88178e-16	1	0.391068	0.11117	0.391068	0.167251	3.55271e-15	1	2.66454e-15	1	1.77636e-15	1	1
AFLA_008820	0.397736	0.35109	0.159285	0.78846	0.427308	0.208682	0.185826	0.667682	0.00699746	1	0.577131	0.0801391	0.238451	1	0.241482	0.597166	-0.570133	0.248846	0.0375816
AFLA_008830	0.137168	0.525191	0.27341	0.148778	0.313269	0.0437416	0.399916	0.0159979	0.118782	0.407155	0.259784	0.0950205	-0.136243	1	-0.0866467	0.7132	-0.141002	0.653655	1.50347e-05
AFLA_008840	-0.412054	0.0166432	-0.291414	0.101521	-0.895964	1.76161e-07	-0.366802	0.020594	-0.137264	0.304434	-0.367809	0.0128676	-0.120639	1	-0.529163	0.0013795	0.230545	0.320378	0.00182259
AFLA_008850	1.5944	0.000263527	1.6173	0.000230428	1.23036	0.00102201	1.17456	0.0029568	0.819326	0.0109935	1.01399	0.00586833	-0.0228982	1	0.0558021	0.984789	-0.194662	0.857429	0.023852
AFLA_008860	-1.60729	0.020007	-0.850918	0.25762	-1.13934	0.0559297	-1.47186	0.020543	-0.963697	0.0638784	-1.06384	0.0733543	-0.756373	0.931893	0.332525	0.712127	0.100139	1	1
AFLA_008870	-1.85999	0.0994605	-0.675175	0.643128	-3.71682	0.000168574	-1.49203	0.15117	-2.50822	0.00287336	-0.820291	0.415303	-1.18481	0.941408	-2.2248	0.0344651	-1.68793	0.230169	0.20845
AFLA_008880	-4.63022	5.16774e-23	-4.55508	5.68724e-23	-2.5082	5.97958e-17	-2.38404	1.11729e-15	-4.3388	1.75383e-25	-3.97066	9.13357e-23	-0.0751319	1	-0.124159	0.596858	-0.368143	0.123542	0.441086
AFLA_008890	0.748659	5.08438e-06	0.99171	2.54011e-08	1.16286	4.33177e-11	0.959738	1.21757e-08	1.36936	2.63977e-14	0.823756	7.92446e-08	-0.243051	0.690624	0.203122	0.184082	0.545605	0.0014521	0.2556
AFLA_008900	2.06324	3.13661e-08	2.30053	3.00977e-09	0.817511	0.00336181	0.461457	0.125246	1.20997	5.62168e-06	1.57745	4.79822e-07	-0.237291	1	0.356054	0.283736	-0.367482	0.42002	0.506073
AFLA_008910	-1.55291	5.53908e-09	-1.28977	2.60711e-07	-0.23448	0.237811	0.218725	0.317979	-0.100748	0.587247	-0.307232	0.110158	-0.263131	0.89709	-0.453205	0.0329604	0.206484	0.554724	9.11108e-07
AFLA_008920	0.459134	0.182422	0.44459	0.203928	-0.329264	0.261582	-0.1752	0.627962	0.00301957	1	0.0816836	0.830332	0.0145441	1	-0.154063	0.720396	-0.078664	0.975265	0.000136952
AFLA_008930	0.589722	0.337226	-0.416821	0.546704	-2.01564	6.54339e-05	-2.08052	9.55946e-05	-0.0551082	0.95234	-0.277155	0.606951	1.00654	0.563211	0.0648777	0.993574	0.222047	0.891199	0.124598
AFLA_008940	-0.908016	0.470302	-1.77636e-15	1	0.223515	0.878998	0.604519	0.605767	1.82565	0.0241903	0.930665	0.33517	-0.908016	1	-0.381004	0.811242	0.894989	0.617265	1
AFLA_008950	-0.397237	0.795161	-0.642332	0.626834	0.678625	0.477548	0.739817	0.478248	0.569213	0.486424	-0.148821	0.924201	0.245095	1	-0.0611916	1	0.718034	0.700277	1
AFLA_008960	0.536949	0.425296	0.153899	0.909757	-0.158548	0.820848	0.263264	0.698127	-2.1715	7.76283e-06	-2.5696	3.76605e-06	0.38305	1	-0.421812	0.533084	0.398099	0.720933	0.409877
AFLA_008970	-1.42392	1.49795e-11	-1.25425	3.15105e-10	-1.13907	1.76485e-10	-0.67744	1.43993e-05	-1.14575	7.11004e-12	-1.11967	2.44949e-10	-0.169664	0.941629	-0.461634	0.00236384	-0.0260835	1	0.82587
AFLA_008980	0.563045	0.0223938	0.569337	0.0217732	0.872835	9.03536e-05	0.883118	0.000170191	-0.351801	0.0578233	0.137838	0.556967	-0.00629122	1	-0.010283	1	-0.489639	0.0970219	0.0722922
AFLA_008990	0.279577	0.00591671	0.206249	0.0457185	0.348366	0.000138051	0.374185	0.000119565	0.569734	2.75412e-09	0.597002	1.41833e-08	0.0733279	1	-0.0258193	0.892185	-0.0272679	0.959465	0.546845
AFLA_009000	-0.29065	0.430427	-0.200568	0.636158	1.02606	0.000329895	0.289268	0.365953	0.445642	0.0655073	-0.108349	0.749385	-0.0900822	1	0.736788	0.0157544	0.553991	0.165644	0.913873
AFLA_009010	-0.721183	0.0436532	-0.328044	0.428009	-1.68441	9.6681e-07	-1.71532	1.89516e-06	-0.0933469	0.779271	-0.460964	0.133973	-0.393139	0.926855	0.0309035	1	0.367617	0.482917	0.410301
AFLA_009020	1.09592	0.0208313	0.973672	0.0430594	1.62929	0.000134075	1.5672	0.000454645	-0.810924	0.0230488	-1.09439	0.00738737	0.122245	1	0.0620831	0.984789	0.283462	0.770752	0.386078
AFLA_009030	-0.107107	0.988967	0.50386	0.579212	2.66454e-15	1	-1.09193	0.103768	0.33375	0.575814	0.33375	0.636	-0.610966	1	1.09193	0.119984	1.77636e-15	1	0.830182
AFLA_009040	0.456925	0.343395	1.25174	0.0042416	0.524321	0.171134	1.27915	0.00159544	1.44141	3.95857e-05	1.84698	6.10325e-06	-0.794819	0.555512	-0.754828	0.0715857	-0.405571	0.551746	0.291048
AFLA_009050	-0.360835	0.109248	-0.259005	0.281108	0.485538	0.0101954	0.315833	0.124002	0.290506	0.0783434	0.288373	0.12843	-0.10183	1	0.169706	0.492503	0.00213259	1	0.575296
AFLA_009060	0.284537	0.408871	-0.0950337	0.867595	0.0504769	0.917193	-0.167244	0.613675	-0.296237	0.200464	-0.0449885	0.923365	0.37957	0.874232	0.217721	0.532729	-0.251248	0.618203	0.907063
AFLA_009070	-0.0570249	0.964934	-0.488341	0.138667	-0.512899	0.0595995	-0.684505	0.0183419	-1.64592	1.3023e-08	-1.62472	1.97833e-07	0.431316	0.814397	0.171606	0.663383	-0.0211993	1	0.0116618
AFLA_009080	-0.194159	0.293883	-0.3482	0.0430594	0.0900291	0.591072	-0.0879584	0.640921	0.597541	1.60278e-05	0.210525	0.153473	0.154041	0.995729	0.177988	0.316362	0.387016	0.0508565	0.000492219
AFLA_009090	-0.392413	0.00118074	-0.257124	0.0336312	-0.101348	0.354703	-0.248431	0.024128	-1.20215	1.26674e-15	-0.845483	2.41411e-10	-0.135289	0.918211	0.147082	0.227686	-0.35667	0.0081288	0.000732028
AFLA_009100	-0.32539	0.443313	-0.019291	1	0.0706029	0.893088	0.452363	0.196348	0.934443	0.00100322	0.955413	0.00278097	-0.306099	1	-0.38176	0.322435	-0.0209698	1	0.116572
AFLA_009110	0.0092892	1	-0.0628852	0.77736	0.00207863	1	-0.0138554	0.993708	-0.668063	1.81012e-07	-0.540926	4.6772e-05	0.0721744	1	0.015934	0.999259	-0.127137	0.587935	0.657963
AFLA_009120	-1.33933	4.68565e-05	-1.38782	2.96981e-05	-0.237656	0.417115	-0.75549	0.00917517	0.31365	0.191791	0.202566	0.490818	0.0484848	1	0.517833	0.0901987	0.111084	0.914568	0.147775
AFLA_009130	-1.52399	0.047078	-1.01497	0.213693	-0.228794	0.792047	-1.02517	0.153559	0.727137	0.21176	3.39305	2.72542e-06	-0.509017	1	0.796372	0.318009	-2.66592	0.00178779	0.402752
AFLA_009140	-2.33359	0.0108394	-2.2988	0.0125112	-0.824987	0.320867	-0.748754	0.419912	0.618187	0.39468	0.476151	0.589311	-0.0347904	1	-0.0762336	1	0.142036	1	0.571416
AFLA_009150	1.77636e-15	1	-1.77636e-15	1	3.55271e-15	1	8.88178e-16	1	0.368369	0.11117	0.368369	0.167251	3.55271e-15	1	2.66454e-15	1	1.77636e-15	1	1
AFLA_009160	1.10338	0.413729	0.398555	0.849576	0.0353771	1	-0.253645	0.897693	-0.600428	0.537146	-1.87961	0.0647357	0.704829	1	0.289022	0.899296	1.27919	0.459113	6.53371e-06
AFLA_009170	-0.764517	0.00295034	-1.0346	0.000103694	-0.507089	0.0215596	-0.471816	0.0464743	0.696562	0.000497489	0.151971	0.530149	0.270084	0.942711	-0.0352737	0.98074	0.544591	0.0740989	0.374823
AFLA_009180	2.37461	0.0155718	2.47882	0.0119204	4.5162	1.69104e-06	4.0167	2.78986e-05	5.52108	2.61421e-09	2.64973	0.00196614	-0.104203	1	0.4995	0.691238	2.87135	0.0097448	0.00450341
AFLA_009190	1.24248	0.190642	1.22821	0.201574	4.41617	5.3271e-07	4.64993	5.91767e-07	3.80018	8.20748e-07	1.25111	0.107692	0.0142732	1	-0.233761	0.887389	2.54907	0.0123921	0.0887263
AFLA_009200	-1.87436	2.2622e-06	-2.83365	4.70924e-10	-2.4196	1.07699e-09	-2.23931	1.9717e-08	-3.01852	2.13451e-13	-3.12193	2.31324e-12	0.95929	0.190847	-0.180292	0.702597	0.103407	0.950072	3.16198e-05
AFLA_009210	1.77636e-15	1	-1.77636e-15	1	-0.380688	0.171549	8.88178e-16	1	0	1	-1.77636e-15	1	3.55271e-15	1	-0.380688	0.23803	1.77636e-15	1	1
AFLA_009220	-3.42328	7.40189e-14	-4.35161	8.91759e-17	-2.57594	5.02364e-12	-2.21129	7.25664e-10	-2.38719	1.3612e-12	-2.65236	2.30071e-12	0.928324	0.10403	-0.364649	0.250273	0.265169	0.598495	0.552998
AFLA_009230	2.66454e-15	1	-8.88178e-16	1	-0.898485	0.411899	-0.094481	1	0.078685	0.986569	-0.95105	0.37247	3.55271e-15	1	-0.804004	0.557824	1.02973	0.58672	0.820342
AFLA_009240	1.83457	0.00243789	0.0523296	1	-2.1945	6.25367e-05	-1.9115	0.0007246	0.136764	0.81753	-0.00111087	1	1.78224	0.112749	-0.283002	0.721292	0.137875	0.980298	0.46731
AFLA_009250	0.0556551	0.971325	-0.854152	0.00823918	-4.27673	1.8e-17	-3.82568	1.84517e-15	-3.84652	9.81458e-18	-3.57279	2.52548e-15	0.909807	0.142917	-0.45105	0.157094	-0.273736	0.603579	0.733362
AFLA_009260	-1.66835	0.0179591	-3.13729	2.58835e-05	-5.15043	1.18408e-10	-4.6778	3.85517e-09	-4.07775	1.38272e-09	-4.05493	2.20306e-08	1.46894	0.420148	-0.47263	0.567468	-0.022822	1	0.00265021
AFLA_009270	0.4032	0.137136	-0.256005	0.392965	0.553025	0.0140969	0.702331	0.0036727	1.00299	4.20156e-06	0.637937	0.00475335	0.659205	0.228864	-0.149306	0.641577	0.365052	0.292791	0.0554654
AFLA_009280	-1.3703	0.00514077	-0.847629	0.0930081	-0.456155	0.30172	-0.316418	0.539054	0.38615	0.309813	0.190353	0.702459	-0.522672	0.941629	-0.139737	0.865808	0.195797	0.891199	0.830182
AFLA_009290	1.77636e-15	1	-0.665952	0.249892	0.44775	0.359238	0.44775	0.40427	0.781325	0.0513813	0.781325	0.0889793	0.665952	0.874232	2.66454e-15	1	1.77636e-15	1	0.723544
AFLA_009300	1.77636e-15	1	-1.77636e-15	1	3.55271e-15	1	8.88178e-16	1	3.27862	1.89387e-08	3.27862	2.18363e-07	3.55271e-15	1	2.66454e-15	1	1.77636e-15	1	0.313029
AFLA_009310	0.419762	0.173887	0.532174	0.0781018	-0.316996	0.226268	0.445527	0.105341	1.93811	6.737e-11	1.8664	2.75115e-09	-0.112412	1	-0.762523	0.00650742	0.0717164	0.973171	0.477599
AFLA_009320	8.20762	2.55318e-11	7.70143	1.18168e-10	4.55155	6.00755e-07	5.33297	8.56665e-08	9.33204	1.44079e-15	8.33486	8.1059e-13	0.506191	1	-0.781419	0.447633	0.997182	0.465966	0.922566
AFLA_009330	7.14866	5.54653e-07	7.28492	3.95533e-07	5.20084	1.35225e-05	4.8925	7.73527e-05	7.06854	4.25426e-09	7.29618	2.89567e-08	-0.136267	1	0.308334	0.901874	-0.227641	1	0.200383
AFLA_009340	3.47034	7.63555e-09	3.3615	1.57164e-08	0.964541	0.0265124	0.651827	0.173756	3.59555	1.02863e-11	3.70611	1.00342e-10	0.108831	1	0.312714	0.60433	-0.110554	0.984637	1
AFLA_009350	1.77636e-15	1	-0.91651	0.409818	-0.523654	0.5803	0.572189	0.579036	-1.06163	0.145514	0.75932	0.384493	0.91651	0.985345	-1.09584	0.268322	-1.82095	0.117462	0.456209
AFLA_009360	-1.02653	0.442279	-0.507819	0.772178	1.10149	0.290563	0.650584	0.605632	2.41454	0.00600805	2.9316	0.00348783	-0.518709	1	0.45091	0.783381	-0.517058	0.863097	0.820342
AFLA_009370	2.66454e-15	1	-8.88178e-16	1	0.106191	0.918721	0.604519	0.344305	-0.459216	0.365658	-1.77636e-15	1	3.55271e-15	1	-0.498329	0.494035	-0.459216	0.700228	0.537054
AFLA_009380	-4.16365	1.38085e-11	-4.13637	1.55675e-11	-1.28743	0.00145846	-0.881432	0.0387676	0.536347	0.125193	0.508032	0.210126	-0.0272742	1	-0.405994	0.421941	0.028315	1	0.191415
AFLA_009390	-0.610966	0.516812	-1.77636e-15	1	-2.12938	0.00200686	-0.519773	0.53051	2.76613	1.76404e-05	1.52549	0.0241936	-0.610966	1	-1.60961	0.0327543	1.24064	0.215908	7.15843e-05
AFLA_009400	-0.642458	0.546716	-8.88178e-16	1	-4.43484	3.18505e-07	-3.13738	0.000180793	1.56706	0.0179875	2.03886	0.00714033	-0.642458	1	-1.29746	0.133214	-0.471806	0.810156	0.637907
AFLA_009410	-1.53836	0.00815631	-1.90317	0.00124272	-4.33005	7.79317e-11	-3.25388	1.30955e-07	1.94372	3.57258e-05	2.03744	0.000103635	0.364807	1	-1.07617	0.0539202	-0.0937115	1	0.474041
AFLA_009420	-3.50408	5.12504e-08	-3.55159	3.95679e-08	-4.06478	1.25811e-10	-4.06152	4.68724e-10	-1.80172	5.70123e-05	-2.12877	3.11932e-05	0.0475198	1	-0.00326054	1	0.327054	0.778282	0.0373307
AFLA_009430	0.411856	0.169238	0.225935	0.519323	0.73187	0.00323584	0.398542	0.138661	-0.804191	0.000332976	-0.612145	0.0126939	0.185921	1	0.333329	0.256046	-0.192046	0.724241	0.795296
AFLA_009440	1.77636e-15	1	-1.77636e-15	1	3.55271e-15	1	8.88178e-16	1	0	1	-1.77636e-15	1	3.55271e-15	1	2.66454e-15	1	1.77636e-15	1	0.986682
AFLA_009450	1.77636e-15	1	-1.77636e-15	1	3.55271e-15	1	8.88178e-16	1	-0.459555	0.111145	-1.77636e-15	1	3.55271e-15	1	2.66454e-15	1	-0.459555	0.388643	1
AFLA_009460	-0.159842	1	0.50386	0.806924	-1.069	0.367521	-1.33873	0.287973	1.72732	0.0759064	1.65525	0.139677	-0.663702	1	0.269727	0.925963	0.0720633	1	0.14047
AFLA_009470	0.96576	0.22421	0.253948	0.845745	-6.6475	8.45901e-13	-6.19145	1.99376e-11	-1.59401	0.00490093	-1.45474	0.022737	0.711813	0.985345	-0.456046	0.609717	-0.139273	0.999277	0.00223462
AFLA_009480	-2.97611	0.00236086	-1.24355	0.237996	-0.589565	0.530525	0.805596	0.412855	0.559861	0.476814	0.168328	0.900778	-1.73255	0.582549	-1.39516	0.147159	0.391533	0.889652	0.320757
AFLA_009490	-0.216396	0.61067	-0.0193635	1	-0.235289	0.458815	0.045148	0.962864	0.656449	0.0100002	-0.0669227	0.876856	-0.197033	1	-0.280437	0.450576	0.723372	0.0704873	0.672456
AFLA_009500	0.225085	0.930511	-0.265521	0.907707	-0.273814	0.818557	1.57939	0.0915266	1.52762	0.0431575	-0.00496806	1	0.490606	1	-1.85321	0.0543134	1.53258	0.23329	0.27374
AFLA_009510	0.777272	0.00300116	0.734873	0.00514834	1.46257	4.13158e-08	1.54484	4.31288e-08	2.56316	2.3517e-15	2.10686	1.02938e-11	0.0423993	1	-0.082274	0.84215	0.456301	0.159342	0.311525
AFLA_009520	3.42315	0.00030239	2.54298	0.00626979	2.47712	0.00216638	1.37573	0.112362	2.79123	0.000141878	4.96836	8.96185e-08	0.880177	0.985447	1.10139	0.244834	-2.17713	0.0432099	0.782229
AFLA_009530	0.397896	0.81562	1.00886	0.424401	-1.3533	0.155385	-1.66777	0.0994285	2.52476	0.00237089	0.385118	0.733966	-0.610966	1	0.314474	0.862609	2.13964	0.0994065	0.820342
AFLA_009540	0.4619	0.697104	0.4619	0.711115	-5.70773	1.91814e-09	-5.23938	4.01067e-08	1.21065	0.0684568	1.16902	0.125936	3.55271e-15	1	-0.468346	0.673094	0.0416297	1	0.820342
AFLA_009550	-3.38104	0.000238444	-0.784609	0.460571	-1.19444	0.126979	-1.26307	0.134066	1.69243	0.012416	0.942051	0.232878	-2.59643	0.128364	0.0686281	1	0.75038	0.613601	0.408127
AFLA_009560	1.77636e-15	1	-1.77636e-15	1	0.782857	0.484136	0.782857	0.52693	1.72898	0.0514413	1.9873	0.0495645	3.55271e-15	1	2.66454e-15	1	-0.258316	0.984637	0.476227
AFLA_009570	-0.906985	0.313534	-1.07725	0.22216	0.859033	0.240732	-0.0375547	1	1.04083	0.0925811	0.773543	0.288485	0.170262	1	0.896588	0.292964	0.267284	0.929045	1
AFLA_009580	-2.41128	0.00619459	-1.99545	0.0246781	-1.02017	0.189691	-1.21762	0.142167	0.714771	0.295233	0.502194	0.548297	-0.415824	1	0.197451	0.915425	0.212577	0.974633	1
AFLA_009590	-0.60198	0.693897	0.118828	1	-1.59241	0.108617	-1.78884	0.0923718	5.12789	2.56841e-07	5.5414	5.93612e-07	-0.720808	1	0.196423	0.954806	-0.413509	0.90871	0.524905
AFLA_009600	-1.47215	0.200168	-1.87649	0.0939897	1.70621	0.069183	0.224527	0.903729	3.8637	1.40059e-05	2.42045	0.00960668	0.404341	1	1.48168	0.171498	1.44325	0.3264	0.637892
AFLA_009610	-1.09516	0.127195	-0.913831	0.220824	0.0577957	0.993051	0.190363	0.845809	2.18839	7.89354e-05	2.06551	0.000722612	-0.18133	1	-0.132567	0.938731	0.122878	1	0.820342
AFLA_009620	-1.59295	0.165086	-0.280717	0.914572	-0.41319	0.72089	-0.789405	0.487577	2.88992	0.000689142	2.11546	0.0244089	-1.31223	0.893233	0.376215	0.82117	0.774465	0.703558	1
AFLA_009630	0.158672	0.762394	0.0649629	0.970529	-0.398736	0.217769	-0.239384	0.531036	1.60896	3.53354e-07	2.27595	3.76509e-09	0.0937092	1	-0.159352	0.746565	-0.666992	0.134215	0.421433
AFLA_009640	1.77636e-15	1	-0.665952	0.115952	3.55271e-15	1	8.88178e-16	1	0.391068	0.210203	0.391068	0.2803	0.665952	0.669052	2.66454e-15	1	1.77636e-15	1	1
AFLA_009650	1.77636e-15	1	-1.77636e-15	1	3.55271e-15	1	8.88178e-16	1	0	1	-1.77636e-15	1	3.55271e-15	1	2.66454e-15	1	1.77636e-15	1	1
AFLA_009660	1.77636e-15	1	-1.77636e-15	1	3.55271e-15	1	8.88178e-16	1	0	1	-1.77636e-15	1	3.55271e-15	1	2.66454e-15	1	1.77636e-15	1	1
AFLA_009670	1.77636e-15	1	-1.77636e-15	1	3.55271e-15	1	8.88178e-16	1	0	1	-1.77636e-15	1	3.55271e-15	1	2.66454e-15	1	1.77636e-15	1	1
AFLA_009680	1.77636e-15	1	-1.77636e-15	1	3.55271e-15	1	8.88178e-16	1	0	1	-1.77636e-15	1	3.55271e-15	1	2.66454e-15	1	1.77636e-15	1	1
AFLA_009690	1.77636e-15	1	-1.77636e-15	1	3.55271e-15	1	8.88178e-16	1	0	1	-1.77636e-15	1	3.55271e-15	1	2.66454e-15	1	1.77636e-15	1	1
AFLA_009700	1.77636e-15	1	-1.77636e-15	1	0.571832	0.0269136	0.571832	0.0390797	0	1	-1.77636e-15	1	3.55271e-15	1	2.66454e-15	1	1.77636e-15	1	1
AFLA_009710	1.77636e-15	1	-1.77636e-15	1	3.55271e-15	1	8.88178e-16	1	0	1	-1.77636e-15	1	3.55271e-15	1	2.66454e-15	1	1.77636e-15	1	1
AFLA_009720	1.77636e-15	1	-1.77636e-15	1	3.55271e-15	1	8.88178e-16	1	0	1	-1.77636e-15	1	3.55271e-15	1	2.66454e-15	1	1.77636e-15	1	0.579413
AFLA_009730	0.461934	0.624095	0.461934	0.636133	-1.19866	0.0604139	0	1	2.27781	0.000107336	2.27781	0.000496057	2.66454e-15	1	-1.19866	0.0953382	1.77636e-15	1	0.484811
AFLA_009740	0.461934	0.729458	-1.46257	0.147558	-2.10708	0.0112077	-0.958236	0.310349	-7.63932	6.49993e-13	-7.49079	2.43109e-11	1.9245	0.464726	-1.14884	0.242993	-0.148535	1	0.0473604
AFLA_009750	-0.578717	0.639414	0.191572	0.957516	-4.36652	1.97369e-06	-3.73274	5.60365e-05	-5.85213	3.96457e-10	-5.986	3.83573e-09	-0.770289	1	-0.633784	0.573555	0.133869	1	0.820342
AFLA_009760	0.505003	0.76787	0.505003	0.779395	-4.28642	6.2765e-05	-3.50143	0.00143204	-1.50725	0.0898239	0.560415	0.625823	3.55271e-15	1	-0.784984	0.569754	-2.06766	0.156397	1
AFLA_009770	1.77636e-15	1	-1.77636e-15	1	-0.381004	0.171549	8.88178e-16	1	0	1	-8.88178e-16	1	3.55271e-15	1	-0.381004	0.23803	8.88178e-16	1	1
AFLA_009780	-0.157285	1	1.09614	0.468139	-0.134506	0.972224	0.12202	0.992748	0.25045	0.849976	0.243573	0.882907	-1.25342	0.966904	-0.256526	0.93051	0.00687651	1	0.00158133
AFLA_009790	-4.92348	3.89609e-11	-4.00743	4.67258e-09	-2.42229	6.23807e-06	-1.65043	0.0018622	1.63009	0.000272312	1.95728	0.000132488	-0.916046	0.679786	-0.771853	0.175386	-0.327191	0.785335	0.409877
AFLA_009800	-3.69597	6.67485e-06	-3.48197	1.85552e-05	-2.58186	0.000172088	-1.93877	0.0060878	0.10783	0.91058	0.402864	0.583766	-0.214004	1	-0.643095	0.446108	-0.295035	0.897811	0.414737
AFLA_009810	-0.30492	0.931367	1.2668	0.426811	-0.559415	0.694214	0.545889	0.737184	-1.79985	0.0808412	-2.05626	0.0805181	-1.57172	0.916753	-1.1053	0.466857	0.256417	0.99903	1
AFLA_009820	1.77636e-15	1	-1.77636e-15	1	3.55271e-15	1	8.88178e-16	1	3.70955	1.06512e-05	3.30185	0.000291131	3.55271e-15	1	2.66454e-15	1	0.407697	0.891488	0.0917611
AFLA_009830	-0.610966	0.630328	-8.88178e-16	1	2.66454e-15	1	0	1	0.881234	0.248223	1.91595	0.0241936	-0.610966	1	2.66454e-15	1	-1.03472	0.478918	0.0583182
AFLA_009840	0.531337	0.753045	1.1423	0.401954	0.296267	0.838988	1.06307	0.367409	2.08008	0.0195903	1.78863	0.0790119	-0.610966	1	-0.766799	0.58412	0.291449	0.972757	1
AFLA_009850	1.77636e-15	1	-1.77636e-15	1	1.14402	0.227699	1.14402	0.26856	2.49045	0.0022676	3.00489	0.00125834	3.55271e-15	1	2.66454e-15	1	-0.514439	0.84065	1
AFLA_009860	-0.446531	0.777002	-0.829931	0.528733	2.62355	0.00460832	1.23477	0.228438	2.08504	0.00986171	2.06942	0.0238169	0.3834	1	1.38878	0.196787	0.0156231	1	1
AFLA_009870	1.77636e-15	1	-1.77636e-15	1	3.55271e-15	1	-0.383237	0.11545	0	1	-1.77636e-15	1	3.55271e-15	1	0.383237	0.133433	1.77636e-15	1	1
AFLA_009880	1.77636e-15	1	-0.711813	0.00739921	3.55271e-15	1	8.88178e-16	1	0	1	-1.77636e-15	1	0.711813	0.174163	2.66454e-15	1	1.77636e-15	1	1
AFLA_009890	1.77636e-15	1	-1.77636e-15	1	3.55271e-15	1	8.88178e-16	1	0.390258	0.11117	0.390258	0.167251	3.55271e-15	1	2.66454e-15	1	1.77636e-15	1	0.594808
AFLA_009900	-2.85506	5.46578e-11	-2.67209	2.68434e-10	-3.46054	1.88548e-14	-2.79978	1.80392e-11	0.0136971	1	-0.420192	0.149617	-0.18297	1	-0.660759	0.0395302	0.433889	0.343813	0.0711005
AFLA_009910	-3.69497	9.34217e-10	-3.15256	3.1482e-08	-2.42175	4.64335e-07	-2.18302	7.37254e-06	-1.09248	0.00347548	-1.18823	0.00501391	-0.542418	0.927258	-0.23873	0.708311	0.0957503	0.994984	0.323667
AFLA_009920	1.77636e-15	1	-1.77636e-15	1	3.55271e-15	1	8.88178e-16	1	0	1	-1.77636e-15	1	3.55271e-15	1	2.66454e-15	1	1.77636e-15	1	0.854074
AFLA_009930	-0.606488	0.602292	1.38335	0.157443	0.0337066	1	0.437542	0.679364	2.35789	0.00102393	0.175675	0.886017	-1.98983	0.395918	-0.403836	0.749233	2.18221	0.043495	0.152266
AFLA_009940	0.11815	1	-1.03788	0.480993	-1.17358	0.288994	-0.384598	0.812931	-0.32019	0.782102	0.724008	0.533177	1.15603	0.987666	-0.788986	0.588961	-1.0442	0.604802	0.907063
AFLA_009950	1.77636e-15	1	-1.77636e-15	1	3.55271e-15	1	8.88178e-16	1	0	1	-1.77636e-15	1	3.55271e-15	1	2.66454e-15	1	1.77636e-15	1	1
AFLA_009960	1.77636e-15	1	-1.77636e-15	1	3.55271e-15	1	8.88178e-16	1	0	1	-1.77636e-15	1	3.55271e-15	1	2.66454e-15	1	1.77636e-15	1	1
AFLA_009970	1.77636e-15	1	-1.77636e-15	1	3.55271e-15	1	8.88178e-16	1	0	1	-1.77636e-15	1	3.55271e-15	1	2.66454e-15	1	1.77636e-15	1	1
AFLA_009980	-1.29414	0.313988	-0.850117	0.563234	0.238666	0.882632	1.32261	0.24108	0.680977	0.470985	0.676136	0.542422	-0.444025	1	-1.08394	0.39072	0.00484138	1	1
AFLA_009990	0.156835	0.889763	0.0735577	1	0.0482634	0.99147	-0.660761	0.224532	-0.778152	0.0684568	-1.40763	0.00414304	0.0832774	1	0.709024	0.218599	0.629481	0.44062	1
AFLA_010000	-2.86267	0.0226073	-1.72127	0.198657	-0.299679	0.849739	-0.420042	0.792832	1.97652	0.0363446	1.96328	0.0687302	-1.1414	0.995729	0.120364	1	0.0132422	1	0.00183329
AFLA_010010	-0.430525	0.752129	0.496104	0.714953	-0.816896	0.350103	-0.762692	0.432464	2.9032	0.00013034	2.1923	0.00780316	-0.926629	0.977719	-0.0542038	1	0.710901	0.679034	0.00520556
AFLA_010020	2.66454e-15	1	0	1	-1.40048	0.0763447	-0.630462	0.50761	-0.0377907	1	-0.856259	0.291723	2.66454e-15	1	-0.770019	0.443605	0.818469	0.573175	0.0018198
AFLA_010030	0.0575314	0.988236	0.524988	0.199089	0.399347	0.242995	0.429984	0.244349	-0.00711716	1	0.478872	0.150456	-0.467457	0.885211	-0.0306374	1	-0.485989	0.357477	0.409877
AFLA_010040	0.971687	0.383063	0.971687	0.392077	-0.761692	0.407374	8.88178e-16	1	-1.75059	0.01891	-0.620991	0.50364	3.55271e-15	1	-0.761692	0.496191	-1.1296	0.42238	0.00499867
AFLA_010050	0.0824355	0.912351	0.617038	0.070113	-1.00739	0.000609299	-0.247378	0.470986	0.458765	0.0671239	0.0838825	0.827902	-0.534603	0.679786	-0.760008	0.0162073	0.374882	0.430071	0.802871
AFLA_010060	0.1312	0.941582	0.574153	0.428191	-0.610293	0.273926	0.68521	0.253739	0.875252	0.061372	1.07132	0.0441798	-0.442954	1	-1.2955	0.0288068	-0.196065	0.933773	0.81405
AFLA_010070	0.649587	0.481725	0.7325	0.422622	0.0227402	1	0.765776	0.322371	1.86567	0.00196435	-0.979762	0.151479	-0.0829128	1	-0.743036	0.377904	2.84543	0.00125956	0.670121
AFLA_010080	-0.0346419	1	-0.0242217	1	0.729629	0.00252806	0.391737	0.132782	0.359601	0.0856213	0.302108	0.214481	-0.0104202	1	0.337892	0.232092	0.0574931	0.989361	0.00010014
AFLA_010090	0.0581958	1	-0.674967	0.294783	-0.209945	0.737013	-0.268976	0.6883	-1.27321	0.00419889	-1.00337	0.0450529	0.733163	0.874232	0.0590315	1	-0.269842	0.85351	0.132344
AFLA_010100	0.156446	1	0.128104	1	-0.837255	0.531171	-0.461217	0.794318	0.507919	0.672528	-1.00682	0.428671	0.0283423	1	-0.376038	0.877134	1.51474	0.450906	1
AFLA_010110	-0.42929	0.809414	-0.856275	0.549441	-0.510097	0.66322	-0.388772	0.789026	-0.895475	0.315606	-8.88178e-16	1	0.426985	1	-0.121325	1	-0.895475	0.653766	1
AFLA_010120	-1.11133	0.00452462	-0.989369	0.0117415	-0.840255	0.0127566	-1.26448	0.000586994	-1.05417	0.000539771	-1.11049	0.00118229	-0.121956	1	0.424228	0.29787	0.0563162	1	1
AFLA_010130	1.11503	7.72209e-06	0.292304	0.248012	1.24396	1.09192e-07	0.386592	0.074073	0.336939	0.0547758	0.519658	0.00959464	0.822721	0.0360369	0.857373	0.000177039	-0.182719	0.652078	1
AFLA_010140	1.2117	0.00436956	1.08128	0.0112106	3.25114	3.91012e-11	1.71839	3.25565e-05	1.7787	9.45804e-07	1.37876	0.000268011	0.130421	1	1.53275	0.000221809	0.399934	0.547108	0.0213143
AFLA_010150	-1.13142	0.224249	-0.201144	0.935413	-0.369623	0.681185	-0.0836887	0.992933	-0.0904527	0.948604	-0.043461	1	-0.930274	0.941629	-0.285934	0.833119	-0.0469917	1	1
AFLA_010160	1.77636e-15	1	-8.88178e-16	1	-3.10679	5.92521e-05	-2.39318	0.00241312	0.802712	0.217612	0.802712	0.287671	2.66454e-15	1	-0.713603	0.445985	1.77636e-15	1	0.127573
AFLA_010170	0.211649	0.905885	0.308395	0.819558	3.36263	1.22975e-05	1.07037	0.171577	6.2679	2.05905e-12	4.35989	1.23833e-07	-0.0967464	1	2.29226	0.00369731	1.90801	0.0475965	0.820342
AFLA_010180	-2.89618	1.72494e-10	-2.2543	4.73124e-08	2.05912	2.2824e-08	0.647681	0.0497755	0.877076	0.00142238	1.10566	0.00046973	-0.641886	0.571918	1.41144	6.94448e-05	-0.22858	0.744218	0.0156443
AFLA_010190	-0.0127616	1	-0.0181766	1	0.239793	0.157977	-0.153219	0.435685	0.66865	2.13338e-05	0.611555	0.000364477	0.00541496	1	0.393012	0.0332511	0.0570953	0.943992	6.77689e-06
AFLA_010200	1.77636e-15	1	-1.77636e-15	1	3.55271e-15	1	8.88178e-16	1	0	1	-1.77636e-15	1	3.55271e-15	1	2.66454e-15	1	1.77636e-15	1	0.413439
AFLA_010210	1.77636e-15	1	-1.77636e-15	1	3.55271e-15	1	8.88178e-16	1	0	1	-1.77636e-15	1	3.55271e-15	1	2.66454e-15	1	1.77636e-15	1	1
AFLA_010220	1.77636e-15	1	-1.77636e-15	1	3.55271e-15	1	-0.497019	0.479997	0.368253	0.506646	-1.22901	0.0349524	3.55271e-15	1	0.497019	0.523637	1.59727	0.043495	1
AFLA_010230	-0.180786	0.779289	-0.465242	0.340298	-1.99936	1.74945e-06	-1.64662	8.47588e-05	0.168949	0.651184	0.0477951	0.956224	0.284456	1	-0.352741	0.465956	0.121154	0.953151	0.318514
AFLA_010240	-0.354464	0.576358	0.0594479	1	-1.20514	0.00670348	-0.827163	0.0836792	0.373581	0.354382	0.737273	0.0963597	-0.413912	1	-0.377972	0.519852	-0.363692	0.702509	0.670121
AFLA_010250	0.154169	1	-1.58023	0.333579	-0.0243421	1	-0.294142	0.908362	0.585771	0.639116	0.188548	0.939986	1.7344	0.896296	0.2698	0.944571	0.397223	0.957642	1
AFLA_010260	1.77636e-15	1	-0.711813	0.311317	3.55271e-15	1	8.88178e-16	1	-1.08358	0.0231631	-1.77636e-15	1	0.711813	0.92121	2.66454e-15	1	-1.08358	0.170753	1
AFLA_010270	2.66454e-15	1	-0.665952	0.665967	-0.573255	0.615963	0	1	0.369684	0.716886	0.184235	0.911381	0.665952	1	-0.573255	0.696989	0.185449	1	0.566999
AFLA_010280	1.77636e-15	1	-1.77636e-15	1	3.55271e-15	1	-0.95849	0.251956	-0.0948916	0.942528	0.647201	0.413431	3.55271e-15	1	0.95849	0.285234	-0.742093	0.598336	1
AFLA_010290	-0.610966	0.375717	-1.3158	0.0342145	0.44775	0.435822	-0.094481	0.946748	0.33375	0.504989	0.33375	0.569806	0.704829	0.916753	0.542231	0.419052	1.77636e-15	1	1
AFLA_010300	-0.610966	0.139378	-8.88178e-16	1	2.66454e-15	1	0	1	8.88178e-16	1	-0.623026	0.0685894	-0.610966	0.722021	2.66454e-15	1	0.623026	0.218391	1
AFLA_010310	-0.732329	0.332048	-1.30704	0.061104	-2.62217	2.99058e-05	-1.91891	0.0024793	-1.06048	0.0391694	-0.374062	0.566484	0.574709	1	-0.703266	0.328332	-0.686422	0.504125	0.309114
AFLA_010320	1.77636e-15	1	-1.77636e-15	1	3.55271e-15	1	8.88178e-16	1	0	1	-1.77636e-15	1	3.55271e-15	1	2.66454e-15	1	1.77636e-15	1	1
AFLA_010330	1.77636e-15	1	-1.77636e-15	1	3.55271e-15	1	8.88178e-16	1	0	1	-1.77636e-15	1	3.55271e-15	1	2.66454e-15	1	1.77636e-15	1	1
AFLA_010340	1.77636e-15	1	-1.77636e-15	1	3.55271e-15	1	8.88178e-16	1	0	1	-1.77636e-15	1	3.55271e-15	1	2.66454e-15	1	1.77636e-15	1	1
AFLA_010350	1.77636e-15	1	-1.77636e-15	1	3.55271e-15	1	8.88178e-16	1	0	1	-1.77636e-15	1	3.55271e-15	1	2.66454e-15	1	1.77636e-15	1	1
AFLA_010360	-1.43497	0.0383049	-1.83539	0.00795366	-0.485369	0.453972	-0.492387	0.490839	0.895258	0.0847928	0.699175	0.250352	0.400423	1	0.0070187	1	0.196083	0.950026	0.421433
AFLA_010370	0.947757	0.385124	0.947757	0.393867	-0.731562	0.417068	0	1	-0.677816	0.3748	1.1779	0.162957	3.55271e-15	1	-0.731562	0.50594	-1.85571	0.112863	1
AFLA_010380	1.77636e-15	1	-1.77636e-15	1	-1.24829	0.189539	-1.87789	0.0598573	0.938284	0.258595	1.67689	0.0703273	3.55271e-15	1	0.629604	0.631255	-0.738607	0.717314	0.413908
AFLA_010390	0.485864	0.742258	0.485864	0.754807	-0.296294	0.808975	-0.0585555	1	1.05854	0.186609	0.724771	0.454534	3.55271e-15	1	-0.237739	0.913441	0.333769	0.932628	0.0305169
AFLA_010400	0.36072	0.837172	0.971687	0.432258	-0.761692	0.442671	-0.922688	0.383893	2.72748	0.00087409	0.783327	0.419257	-0.610966	1	0.160996	0.970049	1.94415	0.13285	1
AFLA_010410	1.77636e-15	1	-1.77636e-15	1	0.641466	0.234464	0.641466	0.275777	1.04361	0.0219401	0.639003	0.230131	3.55271e-15	1	2.66454e-15	1	0.404606	0.725729	1
AFLA_010420	-0.871574	0.469107	-8.88178e-16	1	-2.8089	0.00181349	-0.886021	0.391441	0.642823	0.436115	-0.0692739	0.996303	-0.871574	1	-1.92288	0.0516648	0.712097	0.713899	1
AFLA_010430	1.77636e-15	1	-1.77636e-15	1	3.55271e-15	1	8.88178e-16	1	0.391068	0.11117	0.391068	0.167251	3.55271e-15	1	2.66454e-15	1	1.77636e-15	1	1
AFLA_010440	2.13195	0.088142	0.899353	0.557455	-0.0411317	1	0.546246	0.699808	2.00922	0.0291432	0.768587	0.503059	1.2326	0.957689	-0.587378	0.713577	1.24064	0.497536	0.307328
AFLA_010450	-1.18728	0.221896	-0.466739	0.719712	-0.584727	0.501344	-0.631483	0.505969	-0.0941715	0.948794	2.53285	0.00147812	-0.720545	1	0.0467561	1	-2.62702	0.0106749	1
AFLA_010460	-1.18415	0.000977119	-0.875774	0.0139477	-0.4625	0.135599	0.0454523	0.967504	0.127421	0.679651	0.40199	0.194863	-0.308371	1	-0.507953	0.147159	-0.27457	0.657599	1
AFLA_010470	1.77636e-15	1	-0.665952	0.560651	0.44775	0.625276	0.44775	0.663166	-0.831218	0.235675	0.240467	0.817906	0.665952	1	2.66454e-15	1	-1.07169	0.40418	0.833312
AFLA_010480	-0.307765	0.917512	-0.139548	1	-3.64357	0.00112758	-2.76421	0.0184757	-1.72501	0.0724614	-2.29644	0.0354345	-0.168217	1	-0.879358	0.552488	0.571434	0.862368	1
AFLA_010490	-0.642458	0.664939	-2.91729	0.0100148	-0.460274	0.695278	-1.12091	0.311648	-0.210763	0.861795	-0.738985	0.481795	2.27483	0.453861	0.660639	0.630625	0.528222	0.85027	1
AFLA_010500	-1.27467	0.296171	-1.08705	0.397045	-1.997	0.0378084	-1.95638	0.058523	0.631383	0.485389	-2.17014	0.023457	-0.187619	1	-0.0406245	1	2.80152	0.0289833	0.421723
AFLA_010510	0.505003	0.377763	0.505003	0.386541	-0.350557	0.466495	0	1	8.88178e-16	1	-8.88178e-16	1	3.55271e-15	1	-0.350557	0.553559	1.77636e-15	1	1
AFLA_010520	1.77636e-15	1	-1.77636e-15	1	3.55271e-15	1	8.88178e-16	1	0	1	-0.619646	0.0262621	3.55271e-15	1	2.66454e-15	1	0.619646	0.114625	1
AFLA_010530	1.77636e-15	1	-1.77636e-15	1	3.55271e-15	1	8.88178e-16	1	0	1	-1.77636e-15	1	3.55271e-15	1	2.66454e-15	1	1.77636e-15	1	1
AFLA_010540	1.77636e-15	1	-1.77636e-15	1	-0.0503801	0.998718	0.44775	0.513847	0.859303	0.0828665	0.859303	0.131158	3.55271e-15	1	-0.49813	0.504045	1.77636e-15	1	0.0151194
AFLA_010550	-2.31719	0.00865953	-1.72349	0.0558284	-1.35631	0.0761238	-1.42498	0.0831965	0.111636	0.925062	0.494522	0.556967	-0.593705	1	0.0686692	1	-0.382886	0.870276	1
AFLA_010560	-1.9751	0.155305	-1.49815	0.310714	-1.48859	0.207791	-0.938875	0.49757	-0.784971	0.464979	-0.760467	0.547986	-0.476955	1	-0.54972	0.766742	-0.024504	1	0.247522
AFLA_010570	0.399108	0.28545	0.660867	0.0590187	-0.714016	0.015672	0.0188316	1	0.567081	0.0280456	0.746388	0.0113726	-0.261759	1	-0.732847	0.0249768	-0.179307	0.81548	1
AFLA_010580	-0.567794	0.445118	0.101645	0.984534	-0.392886	0.526464	-0.0660167	0.987369	0.792142	0.10349	-0.0867002	0.935288	-0.669439	0.946723	-0.326869	0.691958	0.878842	0.308327	0.00219668
AFLA_010590	2.06824	0.00550165	0.861463	0.293985	4.62031	4.76478e-09	3.57072	2.18739e-06	-2.59453	1.91652e-05	-1.87867	0.00360206	1.20678	0.675403	1.04959	0.154061	-0.71586	0.533455	0.227412
AFLA_010600	1.47669	0.186883	0.0989249	1	4.46332	7.40799e-06	3.85486	0.000144147	0.977287	0.230406	0.979917	0.300145	1.37776	0.851795	0.60846	0.640153	-0.00262959	1	1
AFLA_010610	0.505003	0.720802	-0.482045	0.750004	3.19668	0.000440536	3.19668	0.000878853	1.583	0.0402323	2.15536	0.0143654	0.987048	0.980496	2.66454e-15	1	-0.572359	0.795772	0.00469434
AFLA_010620	-0.29424	0.534606	-0.55726	0.182309	3.0817	2.22527e-11	3.6725	1.09745e-12	-1.99485	2.37885e-08	-1.04742	0.00223234	0.26302	1	-0.590804	0.125457	-0.947432	0.0370723	2.13458e-05
AFLA_010630	1.23071	0.133997	0.0322912	1	5.47807	4.25398e-10	3.28387	2.26636e-05	-1.0051	0.0925806	0.108769	0.932917	1.19842	0.734778	2.1942	0.00374542	-1.11387	0.288273	3.82397e-05
AFLA_010640	1.16966	4.3066e-05	0.433339	0.128392	2.06582	5.29315e-11	2.43238	3.66603e-12	-0.520908	0.0116345	0.111138	0.686335	0.73632	0.174163	-0.366558	0.180433	-0.632046	0.0473137	0.0396791
AFLA_010650	-1.67273	0.111713	-1.148	0.311083	3.55271e-15	1	-0.497019	0.66661	-0.90076	0.252385	0.104954	0.962699	-0.524734	1	0.497019	0.708648	-1.00571	0.517129	1
AFLA_010660	1.77636e-15	1	-1.77636e-15	1	3.55271e-15	1	8.88178e-16	1	0	1	-1.77636e-15	1	3.55271e-15	1	2.66454e-15	1	1.77636e-15	1	1
AFLA_010670	1.77636e-15	1	-1.77636e-15	1	3.55271e-15	1	-0.922688	0.0951192	0	1	-1.46299	0.00434471	3.55271e-15	1	0.922688	0.110494	1.46299	0.0319517	1
AFLA_010680	1.607	0.0252302	1.52147	0.0359565	1.81887	0.00348946	1.96564	0.00307593	3.95298	4.01171e-09	1.61475	0.00888177	0.0855279	1	-0.146774	0.928676	2.33823	0.00367638	0.27374
AFLA_010690	2.19039	0.000840472	2.31118	0.000471177	2.34035	6.79723e-05	1.39151	0.0193685	2.28506	1.55104e-05	1.30241	0.0188823	-0.120794	1	0.948842	0.135308	0.982645	0.235651	0.312322
AFLA_010700	5.06445	2.24841e-13	4.06425	5.66424e-11	4.72445	5.81185e-14	4.73073	2.41289e-13	3.42703	8.60179e-12	2.74612	2.25187e-08	1.0002	0.416655	-0.00627824	1	0.68091	0.279657	0.914366
AFLA_010710	6.65416	3.07871e-15	6.65416	2.62168e-15	6.85863	5.10905e-17	6.85863	2.18563e-16	1.95927	9.08542e-06	4.38798	6.85201e-12	3.55271e-15	1	2.66454e-15	1	-2.4287	6.07259e-05	1
AFLA_010720	7.66894	5.47089e-11	6.95488	5.65431e-10	6.0023	1.00584e-09	5.61014	1.5152e-08	3.12119	2.09614e-05	4.86767	7.86097e-08	0.714062	1	0.392159	0.748849	-1.74648	0.107057	0.421433
AFLA_010730	1.46044	0.209571	1.47558	0.209113	0.756417	0.464992	-0.0351379	1	0.627626	0.47892	-1.54018	0.103821	-0.0151397	1	0.791555	0.530875	2.1678	0.0987478	0.276195
AFLA_010740	-1.52246	0.000349582	-2.27928	7.70813e-07	1.57884	3.59565e-05	1.10504	0.00412866	1.88105	2.39505e-07	1.16298	0.00140875	0.756819	0.561699	0.473804	0.269519	0.718066	0.166081	0.866564
AFLA_010750	1.77636e-15	1	-1.77636e-15	1	0.727533	0.334417	0.185302	0.889132	-1.21513	0.0512046	-1.77636e-15	1	3.55271e-15	1	0.542231	0.57857	-1.21513	0.259653	0.759119
AFLA_010760	0.34596	0.0374015	0.206871	0.249005	1.11812	7.04414e-10	0.60486	0.000130501	0.222725	0.073742	0.207663	0.148249	0.13909	1	0.513261	0.0012263	0.0150621	1	0.520938
AFLA_010770	-0.368943	0.247233	-0.402528	0.204267	0.646777	0.0114971	-0.15675	0.633565	-0.729652	0.00139138	-1.11611	3.79947e-05	0.0335846	1	0.803527	0.00448494	0.386463	0.338749	0.026299
AFLA_010780	-1.8604	4.1106e-05	-1.6059	0.000308413	-0.835013	0.0251499	-0.971925	0.0148161	-1.84743	6.91117e-07	-2.18712	2.93994e-07	-0.254506	1	0.136913	0.841468	0.339696	0.652078	0.912895
AFLA_010790	-0.581995	0.27775	-2.51883	2.72359e-06	1.16511	0.00638184	0.0181075	1	1.91767	3.47451e-06	2.10118	5.91527e-06	1.93683	0.0143104	1.147	0.0144174	-0.183519	0.904917	0.00307068
AFLA_010800	-0.783253	0.172695	-2.19662	0.000111186	-2.27807	8.7617e-06	-2.56925	3.17258e-06	-1.36457	0.00122679	-1.45267	0.00230451	1.41337	0.208283	0.291183	0.67258	0.0880983	1	0.450787
AFLA_010810	-0.846358	9.80338e-06	-0.860676	7.92053e-06	-0.651992	6.51419e-05	-0.812245	5.76115e-06	-0.425636	0.002007	-0.638862	8.31448e-05	0.0143178	1	0.160253	0.412068	0.213226	0.398753	0.0219252
AFLA_010820	-2.4575	0.00395906	-3.16934	0.000291547	-0.626146	0.43108	-0.722298	0.398615	1.19973	0.0613838	1.40269	0.0549185	0.711845	1	0.0961514	0.996748	-0.20296	0.976203	0.670121
AFLA_010830	-3.94953	3.90954e-06	-2.29427	0.00402652	-0.380688	0.633917	-0.878449	0.251469	2.06604	0.000773986	2.80353	8.97936e-05	-1.65526	0.417626	0.497761	0.598456	-0.737491	0.553486	0.139458
AFLA_010840	-0.156635	0.998357	-0.891942	0.528612	0.416381	0.734628	-0.0448358	1	3.27909	0.000275282	1.58732	0.109451	0.735307	1	0.461217	0.775804	1.69177	0.255849	0.473782
AFLA_010850	1.77636e-15	1	-1.77636e-15	1	3.55271e-15	1	8.88178e-16	1	0	1	-1.77636e-15	1	3.55271e-15	1	2.66454e-15	1	1.77636e-15	1	1
AFLA_010860	-1.81295	7.47944e-09	-2.58661	1.51395e-12	-1.59236	8.58975e-09	-1.65716	1.23555e-08	0.457111	0.0212826	0.115605	0.658581	0.773655	0.117551	0.0647969	0.898522	0.341506	0.34307	1
AFLA_010870	1.77636e-15	1	-1.77636e-15	1	0.571832	0.412991	-0.350856	0.682576	-0.124873	0.883305	-1.52979	0.0176113	3.55271e-15	1	0.922688	0.227977	1.40491	0.123382	0.629524
AFLA_010880	0.210101	0.339957	0.194526	0.393769	-0.251848	0.148521	0.385919	0.0353009	0.493928	0.0012669	0.302115	0.0773551	0.0155758	1	-0.637767	0.000855542	0.191813	0.531602	6.34908e-08
AFLA_010890	1.04857	1.40705e-10	0.997605	4.64209e-10	1.72057	1.38092e-17	1.26003	2.84936e-13	1.16191	2.0091e-14	0.96931	4.88382e-11	0.0509643	1	0.460538	0.000234322	0.192599	0.24343	0.0474245
AFLA_010900	-0.180473	0.59694	-0.11033	0.796684	0.11459	0.685262	0.245014	0.368544	1.46317	7.69296e-09	0.937593	0.000134679	-0.0701429	1	-0.130423	0.715443	0.525576	0.111151	0.389352
AFLA_010910	0.504591	0.0268431	0.439531	0.0581245	0.203123	0.324746	-0.248729	0.258562	-0.651968	0.000264375	-0.419607	0.031257	0.0650599	1	0.451851	0.0378392	-0.232361	0.491839	0.56762
AFLA_010920	-0.0825497	1	0.365676	0.886049	0.262033	0.87825	-0.291201	0.881884	-2.55514	0.00727671	-2.64236	0.0142473	-0.448226	1	0.553235	0.744785	0.087219	1	1
AFLA_010930	-1.88458	5.22389e-11	-2.15262	1.77556e-12	-1.44977	1.38446e-09	-1.17923	3.15695e-07	-1.28481	1.21308e-09	-1.04935	8.91285e-07	0.268039	0.889346	-0.270538	0.229316	-0.235452	0.466625	0.909857
AFLA_010940	-0.700338	0.00012392	-0.842845	8.47447e-06	-0.27195	0.0750457	-0.338364	0.0378197	0.0391332	0.822993	0.324552	0.0319425	0.142507	1	0.0664135	0.794078	-0.285418	0.201329	0.654278
AFLA_010950	-6.29624	2.3233e-26	-6.29774	2.30455e-26	-4.53673	8.2644e-24	-4.4147	8.88024e-23	-3.11429	1.59574e-20	-3.12056	6.04931e-19	0.00150067	1	-0.122035	0.629406	0.00626312	1	0.0243605
AFLA_010960	0.71096	0.0349043	0.410626	0.261465	-0.394195	0.182846	-0.219751	0.533182	0.69555	0.00628968	0.0622485	0.889191	0.300333	0.997216	-0.174443	0.681683	0.633302	0.118854	0.000458302
AFLA_010970	-1.99842	0.0709508	-0.762176	0.580917	1.5381	0.104731	2.68794	0.00746587	-1.51816	0.064325	-1.50584	0.109781	-1.23625	0.918211	-1.14984	0.313918	-0.01232	1	0.92813
AFLA_010980	-2.76504	0.00851393	-1.42295	0.206642	-0.496792	0.640507	1.43592	0.148126	-1.9248	0.0152399	-1.62915	0.0719098	-1.3421	0.863233	-1.93271	0.0554694	-0.295649	0.951381	0.0754046
AFLA_010990	0.768116	0.527973	1.56345	0.141271	3.75637	5.02692e-05	4.02104	4.44406e-05	3.28303	5.59757e-05	4.35499	5.18968e-06	-0.795338	1	-0.264673	0.886774	-1.07196	0.472463	0.176625
AFLA_011000	-0.610966	0.485431	-0.665952	0.447714	2.47151	0.000206449	2.47151	0.000431531	4.47025	5.77917e-10	4.92981	1.02593e-09	0.0549851	1	2.66454e-15	1	-0.459555	0.760282	0.820342
AFLA_011010	-0.181075	0.867283	-0.600061	0.375418	1.96064	0.000227778	2.47703	2.14659e-05	3.52909	7.85398e-10	3.49115	1.47366e-08	0.418986	1	-0.516392	0.427851	0.0379348	1	0.525202
AFLA_011020	1.77636e-15	1	-1.77636e-15	1	0.572189	0.158261	0.572189	0.192801	0.668093	0.0543847	0.668093	0.0932213	3.55271e-15	1	2.66454e-15	1	1.77636e-15	1	0.0690686
AFLA_011030	1.77636e-15	1	-1.77636e-15	1	3.55271e-15	1	8.88178e-16	1	1.03635	0.000556456	1.03635	0.00203344	3.55271e-15	1	2.66454e-15	1	1.77636e-15	1	0.0288633
AFLA_011040	2.16926	8.63286e-05	1.62316	0.00250565	3.11065	1.7383e-08	4.73319	3.79641e-12	4.67222	4.75731e-14	4.63413	1.57411e-12	0.546097	0.950946	-1.62255	0.00151749	0.0380857	1	0.150044
AFLA_011050	1.84227	0.0464668	2.96335	0.00140817	3.88051	6.71853e-06	3.75384	2.77367e-05	6.04936	6.60059e-11	4.27435	1.26983e-06	-1.12109	0.884384	0.126668	0.980615	1.77501	0.107869	0.820342
AFLA_011060	0.77212	0.387244	1.37202	0.0931394	1.79092	0.00886365	1.78966	0.0141387	3.84826	5.73414e-08	2.56742	0.00027433	-0.599904	1	0.00126084	1	1.28084	0.201329	0.229707
AFLA_011070	-0.558365	0.110361	0.0123705	1	-2.19943	1.9019e-09	-1.10582	0.000546579	-1.68805	3.62497e-08	-1.44355	6.0797e-06	-0.570736	0.642541	-1.09361	0.000834182	-0.244496	0.694737	0.175861
AFLA_011080	-1.26155	0.334401	0.974629	0.494696	-2.0177	0.0475887	-1.0037	0.398368	-2.17407	0.0147392	-2.59018	0.0108545	-2.23618	0.516076	-1.014	0.434149	0.416113	0.914792	8.18481e-07
AFLA_011090	0.354127	0.263133	0.361052	0.25665	0.118251	0.698086	-0.289797	0.313099	-0.963158	4.33634e-05	-1.89428	1.72715e-09	-0.00692488	1	0.408047	0.159218	0.931121	0.0045631	0.00228061
AFLA_011100	-0.805005	0.189429	-1.00515	0.0938447	-1.10813	0.0268184	-0.738917	0.181191	-0.0457083	0.973816	-0.155592	0.814112	0.200141	1	-0.369214	0.59381	0.109884	0.998371	0.156497
AFLA_011110	0.384602	0.467337	0.93825	0.0414507	0.52502	0.189691	-0.197003	0.709382	-0.471185	0.17276	0.214528	0.628116	-0.553648	0.885211	0.722023	0.101464	-0.685713	0.238342	0.579413
AFLA_011120	-0.797086	0.129679	0.367774	0.564792	-2.37085	1.31051e-06	-2.74386	2.54196e-07	-1.43974	0.000303558	-0.962374	0.0270306	-1.16486	0.322031	0.373011	0.52072	-0.477365	0.548426	1
AFLA_011130	-0.389571	0.05168	-0.59496	0.00289707	-2.24149	1.5795e-15	-2.18397	1.41091e-14	-1.2983	7.75118e-11	-1.43258	1.42922e-10	0.20539	0.94756	-0.057522	0.862547	0.134278	0.721007	0.303843
AFLA_011140	1.29126	0.309214	0.625307	0.699345	6.40975	5.23205e-08	7.28653	1.21862e-08	10.3185	3.20153e-14	10.7811	2.82847e-13	0.665952	1	-0.876784	0.504699	-0.462591	0.891248	0.296854
AFLA_011150	-0.610966	0.618004	-1.77636e-15	1	-1.60066	0.0548483	-1.38476	0.126617	-4.16178	5.69887e-07	-3.5219	5.97272e-05	-0.610966	1	-0.215907	0.916062	-0.639879	0.729353	1.09694e-10
AFLA_011160	-0.610966	0.671551	-0.91651	0.484606	-2.01775	0.0317571	-1.55281	0.130072	-2.92908	0.000570769	-4.25909	2.26804e-05	0.305543	1	-0.464941	0.755718	1.33002	0.382449	1
AFLA_011170	2.66454e-15	1	-0.649843	0.617497	-2.16852	0.0121705	-0.95643	0.334099	-3.45434	2.25856e-05	-4.94267	4.54878e-07	0.649843	1	-1.21209	0.236016	1.48833	0.249933	1
AFLA_011180	1.77636e-15	1	-1.77636e-15	1	3.55271e-15	1	8.88178e-16	1	0.390258	0.270907	-0.230734	0.60385	3.55271e-15	1	2.66454e-15	1	0.620991	0.313506	1
AFLA_011190	1.77636e-15	1	-0.711813	0.459951	-0.521311	0.500999	8.88178e-16	1	-0.459216	0.485393	-0.969939	0.171007	0.711813	0.998962	-0.521311	0.588961	0.510723	0.753023	1
AFLA_011200	-3.69215	9.31424e-05	-3.21378	0.000549059	0.349627	0.715896	-0.369451	0.732222	-3.73364	1.40044e-06	-3.18584	0.000105456	-0.478373	1	0.719077	0.481579	-0.5478	0.768698	0.0349744
AFLA_011210	-2.62147	3.17542e-06	-1.58246	0.0025301	-2.34405	2.3646e-06	-2.56163	1.37691e-06	-3.60212	2.0149e-11	-3.52587	6.11027e-10	-1.03901	0.464726	0.217573	0.761401	-0.0762544	1	1
AFLA_011220	-2.68756	2.56533e-05	-2.47033	9.08075e-05	-1.53063	0.00364869	-1.65505	0.0032074	-2.53824	9.56035e-07	-2.73226	2.28197e-06	-0.217229	1	0.124422	0.928511	0.19402	0.931841	1
AFLA_011230	-1.25061	6.92634e-11	-1.1416	6.08016e-10	1.34302	5.92851e-13	1.01141	2.1275e-09	-0.788933	8.84221e-09	-0.902903	6.76483e-09	-0.109011	1	0.331613	0.0185748	0.113971	0.660857	0.227469
AFLA_011240	-5.93594	6.41368e-17	-3.34413	2.21568e-10	-8.26567	1.20769e-22	-7.43361	1.37206e-20	-9.01208	2.73549e-25	-9.50272	2.26501e-24	-2.59181	5.21379e-05	-0.832058	0.036489	0.490641	0.402014	0.125836
AFLA_011250	-1.75081	1.38085e-11	-1.42731	1.75422e-09	-1.25938	1.85251e-09	-1.04245	2.91402e-07	-1.6695	8.29552e-14	-1.72166	9.93602e-13	-0.323502	0.651695	-0.216924	0.28056	0.0521648	0.95947	0.152205
AFLA_011260	-1.07811	0.233713	-1.77636e-15	1	-0.314083	0.726067	0.416381	0.661982	0.781325	0.228759	-0.0558979	0.997368	-1.07811	0.863233	-0.730464	0.430609	0.837223	0.513896	1
AFLA_011270	-1.74636	0.00135059	-1.81484	0.000925714	-2.49006	1.60104e-06	-1.01843	0.0408723	-1.3471	0.00120988	-1.18409	0.0107323	0.0684895	1	-1.47162	0.0043013	-0.163014	0.941885	0.008234
AFLA_011280	1.0217	0.000149828	1.16297	2.57858e-05	1.45673	4.49425e-08	1.8732	6.71292e-10	-0.293469	0.13848	-0.334792	0.139819	-0.141271	1	-0.416467	0.101233	0.0413234	1	0.000131034
AFLA_011290	-0.135038	0.50824	-0.0705218	0.791982	-0.384197	0.00954071	-0.182092	0.275611	-2.10725	4.65519e-18	-2.11724	1.37059e-16	-0.0645163	1	-0.202105	0.250539	0.00998405	1	0.0779927
AFLA_011300	-2.37244	1.29059e-05	-2.42174	9.80877e-06	-3.38041	1.22016e-09	-2.33098	5.20083e-06	-2.11531	1.20308e-06	-1.66733	0.000259052	0.0492993	1	-1.04942	0.0317882	-0.447979	0.586583	0.00551643
AFLA_011310	0.380518	0.28141	0.587604	0.0780909	-1.9042	1.61053e-08	-1.29674	3.95591e-05	-0.754441	0.0024169	-0.134823	0.679274	-0.207086	1	-0.607461	0.0510054	-0.619618	0.114242	0.0355499
AFLA_011320	-3.51327	0.000199414	-2.40756	0.0090497	2.97906	0.000275273	3.04618	0.000438721	4.58572	3.25703e-08	3.82409	8.33291e-06	-1.10571	0.890698	-0.0671188	1	0.761631	0.618467	0.82857
AFLA_011330	-1.15656	0.283237	-0.901769	0.436737	0.799032	0.381702	1.63744	0.0749085	-0.602567	0.448423	-1.04795	0.229213	-0.254795	1	-0.838403	0.441134	0.445379	0.861685	0.980618
AFLA_011340	2.66454e-15	1	-0.665952	0.686779	0.220065	0.901405	0.299567	0.866845	-0.764883	0.424327	0.655764	0.566807	0.665952	1	-0.0795025	1	-1.42065	0.400396	0.778262
AFLA_011350	0.182869	0.951799	0.091013	1	-1.2368	0.126411	0.0118515	1	-0.313597	0.701651	0.00745005	1	0.0918556	1	-1.24865	0.178243	-0.321047	0.917562	1
AFLA_011360	0.839665	0.131636	0.354712	0.61006	1.29189	0.0054969	0.67714	0.184784	-1.4556	0.000512506	0.0319618	1	0.484953	0.997216	0.614749	0.26633	-1.48756	0.0147267	0.670121
AFLA_011370	-1.66201	9.33774e-06	-1.11891	0.00163899	-0.0593151	0.915305	0.549073	0.0939907	0.183726	0.523362	-0.0570905	0.910309	-0.543099	0.714738	-0.608388	0.0724855	0.240817	0.717554	0.633083
AFLA_011380	-0.200769	0.741971	0.313016	0.565594	0.411601	0.291585	0.148853	0.784825	0.295686	0.388418	1.85942	5.18461e-06	-0.513785	0.896296	0.262748	0.614309	-1.56374	0.00130287	0.51976
AFLA_011390	-0.778968	0.149933	0.444983	0.472609	-0.222046	0.678	-0.00207201	1	-0.514067	0.194985	1.35339	0.00272094	-1.22395	0.295104	-0.219974	0.757369	-1.86745	0.00135741	1
AFLA_011400	-0.298187	0.663236	-0.0874154	0.978603	-5.21269e-05	1	0.120905	0.881961	-1.41886	0.000491367	0.985229	0.0275387	-0.210772	1	-0.120957	0.908733	-2.40409	4.82216e-05	8.11287e-05
AFLA_011410	1.17878	0.339553	0.855432	0.534975	-2.06187	0.0315248	0.243207	0.894091	-0.0932174	0.9685	0.33375	0.78446	0.323346	1	-2.30508	0.0301924	-0.426968	0.899616	7.51861e-10
AFLA_011420	0.590275	0.626954	0.582889	0.643128	3.73295	2.1116e-05	3.73295	4.98923e-05	1.48368	0.0380722	1.48368	0.0694573	0.00738573	1	2.66454e-15	1	1.77636e-15	1	0.0110219
AFLA_011430	3.83744	4.241e-05	3.17149	0.000523727	4.54139	2.90851e-07	4.07991	5.16806e-06	2.31471	0.000849392	2.31471	0.00293221	0.665952	1	0.461471	0.685759	1.77636e-15	1	0.017307
AFLA_011440	6.72065	2.21673e-13	6.60047	3.18239e-13	6.89912	4.29599e-15	7.35257	3.50202e-15	4.89509	1.31693e-12	7.87649	1.09308e-16	0.120179	1	-0.453454	0.534297	-2.9814	3.62149e-05	1.50709e-08
AFLA_011450	0.965794	0.310002	0.965794	0.316085	2.53828	0.000885551	2.04306	0.0105346	0.859437	0.194602	-1.22455	0.102046	3.55271e-15	1	0.495213	0.642067	2.08398	0.0377977	0.0178408
AFLA_011460	-4.13181	3.71898e-18	-3.83341	2.77925e-17	-0.692584	0.0024109	-0.854957	0.000525028	-0.376415	0.0560772	-0.751226	0.00106525	-0.298397	0.91812	0.162373	0.603428	0.374811	0.276024	0.820342
AFLA_011470	-3.16555	5.33731e-09	-3.62301	2.45188e-10	1.26651	0.00140166	0.536717	0.21603	3.09673	2.80497e-11	3.01587	9.23709e-10	0.457464	0.95697	0.729794	0.0975529	0.0808639	1	0.00588141
AFLA_011480	0.507366	0.0881015	0.381286	0.223993	1.10164	3.679e-05	1.18717	2.92151e-05	1.87824	1.10844e-10	1.3858	8.68067e-07	0.12608	1	-0.0855311	0.859284	0.492436	0.175924	0.698539
AFLA_011490	1.01338	0.365545	2.62773	0.00895089	0.996808	0.267025	-0.290005	0.832118	2.85292	0.000283053	1.04538	0.235865	-1.61435	0.677791	1.28681	0.20331	1.80754	0.141456	0.00185962
AFLA_011500	1.77636e-15	1	-1.77636e-15	1	-0.381004	0.588753	8.88178e-16	1	2.25223	7.77671e-05	2.25223	0.00037453	3.55271e-15	1	-0.381004	0.671051	8.88178e-16	1	0.108165
AFLA_011510	2.66454e-15	1	-8.88178e-16	1	-0.0819472	0.944062	0.416381	0.501577	0.702119	0.118943	0.702119	0.176591	3.55271e-15	1	-0.498329	0.447633	1.77636e-15	1	0.0599869
AFLA_011520	-0.392515	0.163254	-0.313624	0.289648	-0.0634157	0.852735	0.278041	0.289788	-0.0989564	0.671579	0.0249952	0.971999	-0.0788909	1	-0.341456	0.210396	-0.123952	0.854533	0.659398
AFLA_011530	-1.19008	0.000894169	-0.40078	0.305754	-4.4512	8.22971e-17	-5.23646	3.59616e-18	0.502035	0.0591668	-0.237241	0.468945	-0.789302	0.351049	0.785259	0.0193585	0.739276	0.0797452	0.0284618
AFLA_011540	0.452648	0.533574	0.497974	0.494605	1.59186	0.0024917	2.37684	4.87939e-05	5.20866	7.46697e-14	2.83505	1.11404e-06	-0.0453255	1	-0.784985	0.197077	2.37362	0.000451265	0.403909
AFLA_011550	-1.16272	0.00218078	-1.09964	0.00379745	-0.857378	0.00852702	-0.116797	0.81548	0.413148	0.149105	-0.271822	0.433291	-0.0630719	1	-0.740581	0.0403421	0.684971	0.138934	0.441016
AFLA_011560	0.928815	0.000227973	0.866459	0.000540854	-3.81776	1.74222e-19	-3.72967	1.72256e-18	-1.90165	1.21789e-12	-1.79664	1.05022e-10	0.062356	1	-0.0880862	0.808118	-0.105013	0.874594	0.583892
AFLA_011570	-0.311903	0.0352731	-0.0649736	0.77085	-0.0377597	0.834055	0.116814	0.435771	0.287603	0.00990105	0.0721002	0.615171	-0.24693	0.644824	-0.154573	0.317115	0.215502	0.261886	4.16275e-07
AFLA_011580	-0.257943	0.286201	-0.281096	0.242838	0.427717	0.0252613	0.157838	0.493931	-0.0243926	0.942356	-0.244894	0.208578	0.0231527	1	0.269879	0.233771	0.220501	0.512109	0.850971
AFLA_011590	-0.336865	0.0393448	-0.390342	0.0168837	0.239972	0.0886124	-0.0542376	0.793684	-0.421578	0.000813381	-0.507288	0.000426332	0.0534762	1	0.29421	0.0593968	0.0857103	0.812982	1.83552e-06
AFLA_011600	-0.333195	0.00192486	-0.079423	0.550972	0.366226	0.000137189	-0.0810754	0.4594	-0.251691	0.00210292	-0.336492	0.000380286	-0.253772	0.286956	0.447301	3.15678e-05	0.0848008	0.644471	0.878793
AFLA_011610	0.577903	0.00704143	0.519559	0.0160364	1.05739	4.94016e-07	0.702753	0.000509229	1.00237	1.24506e-07	0.800879	4.30731e-05	0.0583438	1	0.354639	0.0886747	0.201486	0.548582	0.266617
AFLA_011620	-0.385096	0.00664815	-0.247145	0.0913918	0.28601	0.0192129	0.0492226	0.782388	-0.207543	0.0520576	-0.25346	0.0372182	-0.137951	0.976531	0.236788	0.0853727	0.0459164	0.929843	0.117926
AFLA_011630	-0.379821	0.0698596	-0.220585	0.33992	-0.324216	0.0691942	-0.411627	0.0304742	-0.838182	1.62911e-06	-0.996976	6.6275e-07	-0.159236	1	0.0874112	0.757369	0.158794	0.659748	0.000887829
AFLA_011640	-0.00930322	1	0.0193474	1	0.564039	0.0267896	0.597604	0.0284527	-0.111861	0.66108	-0.19672	0.473764	-0.0286506	1	-0.0335651	0.996436	0.084859	0.949073	9.72625e-09
AFLA_011650	0.504141	0.0026707	0.726141	3.70558e-05	0.977557	1.71697e-08	0.436355	0.00473162	-0.102025	0.447319	0.144961	0.334221	-0.222	0.83785	0.541202	0.000785379	-0.246987	0.254724	0.00892495
AFLA_011660	0.186219	0.377071	0.52046	0.00580618	0.46709	0.00413108	0.428039	0.0132735	-0.637323	2.812e-05	-0.746684	1.69095e-05	-0.334241	0.58143	0.0390512	0.92664	0.109361	0.780249	0.266199
AFLA_011670	-3.11467	0.000120789	-2.27896	0.00387998	-0.821861	0.240373	-1.56776	0.0300045	-0.983415	0.0965468	-0.624152	0.380135	-0.835705	0.941629	0.745896	0.374105	-0.359262	0.856058	0.826731
AFLA_011680	-0.899971	0.000140654	-0.980917	4.54485e-05	0.10141	0.664977	0.0408563	0.926787	0.339131	0.0490761	0.236148	0.242595	0.0809458	1	0.0605536	0.883286	0.102983	0.861685	1.1699e-05
AFLA_011690	-1.83636	0.0684674	-0.576417	0.667964	-1.02341	0.249376	-1.19438	0.208438	-1.02907	0.174313	-0.647996	0.483823	-1.25994	0.867554	0.170967	0.954882	-0.38107	0.8994	7.51427e-06
AFLA_011700	-0.726313	7.79273e-05	-0.614663	0.00064833	0.768328	4.3928e-06	0.468169	0.00420683	0.863771	5.17843e-08	0.717838	1.24929e-05	-0.11165	1	0.300159	0.0790013	0.145933	0.621969	0.899201
AFLA_011710	0.758411	0.0109998	1.0849	0.000390433	1.97974	1.10417e-09	2.06649	1.50135e-09	1.69589	2.07036e-09	2.48574	4.6731e-12	-0.326491	0.932231	-0.0867478	0.862104	-0.789857	0.0204616	0.147319
AFLA_011720	0.199863	0.023087	0.222387	0.0117471	0.556836	3.02044e-09	0.421311	2.21185e-06	0.0366343	0.622658	0.0492478	0.556391	-0.0225241	1	0.135525	0.114655	-0.0126135	1	0.566952
AFLA_011730	-0.571077	0.123639	-0.73074	0.0450762	-0.260361	0.438272	-0.346012	0.328759	-0.448782	0.0976899	0.2972	0.359055	0.159663	1	0.0856511	0.902836	-0.745982	0.0813735	0.750777
AFLA_011740	0.355636	0.297152	0.208906	0.603438	-0.312399	0.264669	-0.0838109	0.851045	-0.271413	0.259548	-0.449277	0.0953563	0.146729	1	-0.228588	0.52291	0.177864	0.787597	0.533544
AFLA_011750	-0.00838641	1	0.0658407	0.834935	-0.085484	0.651053	-0.106089	0.59908	0.339461	0.0154197	0.353185	0.0266241	-0.0742271	1	0.0206055	0.998018	-0.0137245	1	0.00231383
AFLA_011760	0.0550147	0.94096	0.0457865	0.972167	0.647247	0.00406364	0.368336	0.131065	-0.521688	0.00798987	-0.548473	0.0138522	0.00922821	1	0.278911	0.303305	0.0267847	1	0.525202
AFLA_011770	0.431877	0.0103422	0.60242	0.000471105	-0.876609	1.78511e-07	0.117457	0.503245	-0.53322	7.56401e-05	-0.240145	0.098755	-0.170542	0.95697	-0.994066	7.89767e-08	-0.293075	0.161853	0.115911
AFLA_011780	0.70438	3.04503e-06	0.928377	1.52272e-08	-1.03468	8.07547e-11	-0.0732982	0.635518	-0.593301	7.0332e-07	-0.38283	0.00164595	-0.223996	0.679786	-0.961384	2.78959e-09	-0.210471	0.239099	0.18012
AFLA_011790	-0.279264	0.210552	-0.0938444	0.766322	-0.914597	4.22142e-06	-0.547025	0.00480894	0.0802555	0.656983	-0.312713	0.0838612	-0.18542	0.997216	-0.367572	0.069192	0.392969	0.123382	0.0046407
AFLA_011800	-0.852297	8.26825e-11	-1.06673	2.7702e-13	-1.56796	2.34877e-19	-1.40108	3.01135e-17	-1.62467	2.65164e-21	-1.64883	7.09912e-20	0.214437	0.412676	-0.166875	0.091591	0.0241609	0.976212	0.011991
AFLA_011810	-0.817773	0.00350746	-0.698016	0.0128781	-0.783671	0.00136783	-0.631415	0.0141374	0.133107	0.5654	-0.0857598	0.777543	-0.119757	1	-0.152256	0.663097	0.218866	0.652301	0.820342
AFLA_011820	-0.380289	0.013656	-0.361342	0.0199832	0.3245	0.014695	-0.199052	0.173837	-0.470169	0.000123779	-0.529611	0.000133169	-0.018947	1	0.523552	0.00046236	0.0594415	0.897796	0.000157814
AFLA_011830	0.505003	0.765445	-0.144841	1	0.959896	0.372411	1.07935	0.35285	1.54876	0.0790143	1.35582	0.184643	0.649843	1	-0.119455	1	0.192943	1	0.752723
AFLA_011840	-0.289043	0.919884	-0.858276	0.576719	0.764468	0.510676	2.45129	0.0285327	6.45061	9.06015e-09	6.57029	7.64181e-08	0.569232	1	-1.68682	0.161648	-0.119683	1	0.285239
AFLA_011850	-2.03515	0.0354092	0.225835	0.932134	0.671557	0.459129	2.49521	0.00498921	7.08701	4.46144e-12	5.62406	1.60328e-08	-2.26099	0.299458	-1.82365	0.0478959	1.46295	0.235651	0.820342
AFLA_011860	0.42688	0.00611229	0.359837	0.0217726	0.37535	0.00538248	0.107967	0.505586	0.571453	8.67574e-06	0.502328	0.000288972	0.0670435	1	0.267383	0.0750205	0.069125	0.865173	0.146619
AFLA_011870	-0.0611024	0.941968	-0.124416	0.779395	0.361989	0.155431	0.646828	0.0154216	0.752073	0.000821013	0.942463	0.000266675	0.0633132	1	-0.284838	0.356114	-0.19039	0.735	0.681569
AFLA_011880	0.115399	0.736738	-0.0313901	1	0.388521	0.0673833	0.196238	0.431848	-0.388802	0.0356063	0.0113824	1	0.146789	1	0.192283	0.48666	-0.400184	0.197485	0.621037
AFLA_011890	-0.0327032	0.973643	-0.0719568	0.819228	0.267612	0.110293	0.206052	0.270646	-0.0968729	0.540203	-0.122344	0.496862	0.0392536	1	0.0615594	0.838639	0.0254711	1	0.607223
AFLA_011900	-0.113228	0.853504	-0.222853	0.629612	-0.029256	0.993051	0.545639	0.0968011	0.633347	0.0169494	0.591722	0.0500421	0.109625	1	-0.574895	0.0926336	0.0416256	1	0.45056
AFLA_011910	0.113779	0.869315	0.0982205	0.910586	1.00367	0.00226171	0.489465	0.170708	1.36002	1.128e-05	1.60754	5.69024e-06	0.0155581	1	0.514206	0.17147	-0.247514	0.734668	0.787898
AFLA_011920	-0.612945	0.00158188	-0.415503	0.0327912	1.10845	2.33454e-08	0.285108	0.113578	-0.446074	0.00246927	-0.453431	0.00631572	-0.197443	0.950946	0.82334	2.39279e-05	0.0073568	1	0.489385
AFLA_011930	0.811681	0.000209681	0.376071	0.086357	0.148799	0.458672	-0.0464966	0.894091	0.596569	0.000349765	0.424073	0.0202849	0.43561	0.435584	0.195296	0.395583	0.172496	0.634109	1.03895e-05
AFLA_011940	-0.226085	0.195749	-0.140977	0.475447	-0.415741	0.00378214	-0.424164	0.00546667	-0.018419	0.940818	-0.0854836	0.591434	-0.0851082	1	0.0084239	1	0.0670646	0.888089	0.221406
AFLA_011950	0.440112	0.0844048	0.349559	0.188671	0.170589	0.469851	0.335365	0.155441	-0.723849	0.000234386	-0.228838	0.304476	0.0905528	1	-0.164777	0.574817	-0.495011	0.0982308	0.0367681
AFLA_011960	0.160198	0.604879	-0.138363	0.682943	0.22109	0.323158	-0.155256	0.552448	-0.360377	0.052223	-0.0758806	0.776925	0.298561	0.890698	0.376347	0.118815	-0.284496	0.416037	0.0369025
AFLA_011970	1.5768	2.60618e-13	1.4899	1.06297e-12	1.68754	1.69843e-15	1.8365	7.63794e-16	1.29337	7.06624e-14	1.05762	2.40609e-10	0.0869078	1	-0.148955	0.34756	0.235751	0.214657	0.00905213
AFLA_011980	-0.29991	0.0620527	-0.186823	0.284139	-0.303952	0.0260941	0.18359	0.228341	0.14914	0.220289	0.256713	0.0596698	-0.113087	1	-0.487542	0.00139315	-0.107573	0.720933	0.00136957
AFLA_011990	1.90431	0.000677627	1.16221	0.0374766	0.58876	0.231036	0.56314	0.296228	-1.40835	0.000960912	-0.582405	0.230297	0.742104	0.826156	0.0256208	1	-0.825943	0.244913	2.64585e-05
AFLA_012000	0.638539	0.0256948	0.626791	0.0297737	0.445266	0.0714865	0.475152	0.0731878	0.746592	0.000752764	1.09626	2.87516e-05	0.0117484	1	-0.0298855	1	-0.349667	0.380358	0.0129011
AFLA_012010	-0.0460663	0.942298	0.208906	0.40993	0.620485	0.00124483	0.76121	0.000252212	1.55645	1.08834e-11	1.88465	2.11561e-12	-0.254972	0.909418	-0.140725	0.58862	-0.328201	0.244913	0.0188314
AFLA_012020	-1.40344	2.37778e-06	-0.769869	0.00514834	-3.29581	2.90003e-16	-2.4898	2.11239e-12	-0.810629	0.000177406	-0.886848	0.000273847	-0.633572	0.310412	-0.806012	0.00210135	0.0762196	0.95288	0.45725
AFLA_012030	0.93295	0.00653205	1.40438	8.58359e-05	-0.554187	0.0614272	-1.04952	0.00106954	-1.7676	1.71823e-08	-1.90162	4.71521e-08	-0.471427	0.811389	0.495331	0.143526	0.134027	0.895674	0.0851787
AFLA_012040	-0.476176	0.714154	-2.17873	0.0230636	0.118241	0.955628	0.533515	0.606621	-0.104886	0.941948	-1.39283	0.0894139	1.70255	0.576781	-0.415275	0.747841	1.28794	0.313184	0.176625
AFLA_012050	0.823836	0.00779084	1.17016	0.000244406	-0.374657	0.169739	-0.793461	0.00553916	-2.24297	6.78649e-12	-2.38987	3.0171e-11	-0.346327	0.924356	0.418804	0.176352	0.146899	0.84556	0.0010923
AFLA_012060	2.62118	6.51026e-13	3.16135	3.94487e-15	1.3701	1.22796e-07	0.570396	0.0164087	1.08186	9.49155e-07	0.769104	0.000720245	-0.540167	0.417146	0.799702	0.00127182	0.312759	0.38623	0.114073
AFLA_012070	1.39204	1.3228e-12	1.62061	2.17931e-14	-0.331493	0.00656035	-0.877111	1.54325e-08	-0.87089	3.0731e-10	-0.816105	1.947e-08	-0.228568	0.675403	0.545618	9.43784e-05	-0.054785	0.896215	0.0139834
AFLA_012080	1.88466	1.46546e-06	2.08158	2.36402e-07	1.35921	3.40461e-05	0.560405	0.0925424	-2.24007	2.17854e-10	-2.28988	2.20145e-09	-0.196914	1	0.798803	0.0185748	0.0498057	1	9.08117e-05
AFLA_012090	0.133663	0.405349	0.206875	0.165745	-0.0372195	0.827376	-0.0464113	0.798397	-0.191828	0.0716528	-0.389635	0.00159661	-0.0732119	1	0.00919184	1	0.197806	0.291949	0.0100367
AFLA_012100	-1.3881	3.74715e-07	-1.2287	3.51722e-06	-1.5446	3.18378e-09	-1.1849	1.81322e-06	-0.304049	0.0994888	-0.66277	0.00187339	-0.159409	1	-0.359695	0.133932	0.358721	0.259044	1.70261e-06
AFLA_012110	-0.0413748	0.944175	0.274942	0.1957	0.758059	3.3886e-05	0.483225	0.00848053	-0.414738	0.00610604	-0.00472623	1	-0.316317	0.692905	0.274834	0.165355	-0.410011	0.0851326	0.0278562
AFLA_012120	-0.0984043	0.73906	-0.0563183	0.905473	0.158147	0.420448	-0.194622	0.352749	-0.367769	0.0205532	0.0463733	0.857595	-0.0420859	1	0.352769	0.0840627	-0.414143	0.101154	0.548394
AFLA_012130	0.980949	0.000878744	0.736438	0.0116792	0.501112	0.0454087	0.599404	0.0252042	-0.0806599	0.764632	0.34366	0.17565	0.24451	1	-0.0982911	0.824884	-0.42432	0.263105	0.361568
AFLA_012140	0.658799	0.00112231	0.615547	0.00227699	0.581689	0.000933579	0.155128	0.44731	-0.177844	0.24752	0.146603	0.424017	0.0432513	1	0.426561	0.0251401	-0.324448	0.199259	0.00214187
AFLA_012150	-0.376972	0.0228773	-0.359703	0.031501	0.164673	0.267663	-0.223406	0.153083	-0.47066	0.000292173	-0.312373	0.0276515	-0.0172691	1	0.388079	0.0135788	-0.158287	0.536871	0.947805
AFLA_012160	-0.194513	0.204115	-0.215979	0.155686	0.821534	3.08517e-08	0.476107	0.000476796	-0.295868	0.00697225	-0.293875	0.0178379	0.0214654	1	0.345426	0.0119285	-0.00199271	1	0.533269
AFLA_012170	-0.0476645	0.801143	0.121458	0.392262	0.22282	0.0365379	-0.00956997	1	-0.366459	0.000179086	-0.156497	0.145597	-0.169122	0.81487	0.23239	0.0501147	-0.209961	0.174105	0.000100444
AFLA_012180	-0.0670169	0.7611	-0.223881	0.165855	0.202773	0.129121	0.227574	0.112049	0.0490541	0.719393	0.154259	0.253901	0.156864	0.950946	-0.0248009	0.962781	-0.105205	0.71605	0.633488
AFLA_012190	-0.23151	0.17666	-0.121266	0.551718	-0.637626	2.27749e-05	-0.702717	1.26807e-05	-0.0417745	0.786732	-0.0859649	0.582977	-0.110244	1	0.0650913	0.778046	0.0441904	0.957864	0.636009
AFLA_012200	-0.39009	0.0611763	-0.277776	0.207755	0.158206	0.407939	-0.142455	0.506142	0.589601	0.000267445	0.337831	0.0558568	-0.112315	1	0.300661	0.137583	0.25177	0.380688	7.90891e-06
AFLA_012210	0.349692	0.153582	0.245995	0.352676	1.16726	4.27767e-07	0.656484	0.00260307	-0.307216	0.0831301	0.0576821	0.834269	0.103698	1	0.510772	0.0225059	-0.364898	0.223811	0.00671521
AFLA_012220	0.107951	0.430427	0.0277904	0.93326	0.643224	8.8549e-08	0.522388	9.72771e-06	0.255191	0.00492172	0.321064	0.00201502	0.0801602	1	0.120837	0.337293	-0.0658728	0.799526	0.103651
AFLA_012230	0.0154937	1	-0.0690686	0.832052	0.165408	0.348395	-0.141664	0.478049	-0.55594	0.000251933	-0.00782266	1	0.0845623	1	0.307072	0.102153	-0.548117	0.0121363	0.0315965
AFLA_012240	0.079657	0.296295	0.016376	0.932175	0.187623	0.00208254	-0.036063	0.642891	-0.357648	1.93024e-08	-0.381857	6.17189e-08	0.063281	0.996917	0.223686	0.000870529	0.0242095	0.917182	1
AFLA_012250	0.0131233	1	0.0750476	0.622755	0.278885	0.00585763	0.0505075	0.711325	0.110454	0.217612	0.141247	0.166071	-0.0619243	1	0.228377	0.0413289	-0.0307939	0.961688	0.693504
AFLA_012260	-0.440912	0.000832426	-0.471687	0.000399489	-0.298178	0.00796258	-0.229457	0.0565573	-0.262135	0.00780612	-0.398131	0.000531646	0.0307747	1	-0.0687212	0.674943	0.135996	0.477757	0.159899
AFLA_012270	-0.00904716	1	-0.113958	0.746814	0.0826573	0.751137	-0.214917	0.36989	-0.979177	1.54167e-06	-0.50654	0.0140984	0.104911	1	0.297575	0.223966	-0.472638	0.100878	3.19979e-06
AFLA_012370	-0.218209	0.59099	-0.17445	0.70342	0.661746	0.0184841	0.178692	0.617665	0.0121742	1	0.606511	0.0301504	-0.0437593	1	0.483054	0.132433	-0.594337	0.137412	0.565726
AFLA_012380	0.18749	0.520595	0.0320333	1	0.295716	0.169227	0.448263	0.0470917	-0.156842	0.42064	0.334782	0.112847	0.155456	1	-0.152547	0.600028	-0.491624	0.0927559	0.000276761
AFLA_012390	0.397896	0.882936	1.00886	0.565594	0.670646	0.634083	0.887429	0.547737	0.550838	0.645071	-0.459408	0.757404	-0.610966	1	-0.216783	0.967721	1.01025	0.692804	1
AFLA_012400	-0.332576	0.355417	-1.17357	0.000390433	0.530274	0.0571358	0.3003	0.348757	-1.07539	3.70024e-05	-0.621524	0.0247452	0.840991	0.19946	0.229974	0.536146	-0.453861	0.288455	3.67094e-07
AFLA_012410	-0.0792981	0.811467	-0.0960506	0.763814	0.674385	0.000373611	0.466718	0.0174514	0.0146183	0.984891	-0.0919536	0.66508	0.0167525	1	0.207667	0.360772	0.106572	0.829214	0.198775
AFLA_012420	0.333692	0.0695227	0.0542977	0.879553	-0.219784	0.168137	-0.390048	0.0192877	-0.72259	2.20606e-06	-0.279165	0.0732458	0.279395	0.716906	0.170265	0.381388	-0.443425	0.0335884	0.0088014
AFLA_012430	-0.212338	0.108599	-0.354615	0.00607313	0.257504	0.0199544	0.212376	0.0753015	-0.295639	0.00265649	-0.232835	0.0346005	0.142277	0.928041	0.045128	0.81367	-0.0628037	0.836713	8.5086e-08
AFLA_012440	-0.265939	0.490312	-0.128604	0.804388	-0.103019	0.778407	0.0984659	0.822937	0.507702	0.0390659	0.814273	0.00403407	-0.137335	1	-0.201485	0.606526	-0.306571	0.548772	0.275184
AFLA_012450	0.0452449	0.910646	0.0616732	0.845895	0.0895103	0.622478	-0.177955	0.317727	0.0165051	0.960924	0.420264	0.00707852	-0.0164283	1	0.267465	0.132867	-0.403759	0.0575753	0.0006994
AFLA_012460	0.0478421	1	-0.193101	0.729792	0.30758	0.392359	0.506497	0.168508	-0.673169	0.0213471	-0.16462	0.671138	0.240943	1	-0.198917	0.688097	-0.508549	0.336087	0.000922256
AFLA_012560	0.400557	0.223903	0.530749	0.0957306	0.0908466	0.797813	0.194552	0.551822	1.29041	9.83517e-07	1.34724	3.92066e-06	-0.130192	1	-0.103706	0.826406	-0.0568323	1	0.00257406
AFLA_012860	1.77636e-15	1	-1.77636e-15	1	3.55271e-15	1	8.88178e-16	1	0	1	-1.77636e-15	1	3.55271e-15	1	2.66454e-15	1	1.77636e-15	1	1
AFLA_012870	1.77636e-15	1	-1.77636e-15	1	3.55271e-15	1	8.88178e-16	1	0	1	-1.77636e-15	1	3.55271e-15	1	2.66454e-15	1	1.77636e-15	1	1
AFLA_012880	-0.262937	0.119717	-0.186127	0.304621	0.89983	6.05039e-08	1.02672	1.31055e-08	0.889498	5.60963e-09	0.983937	8.93567e-09	-0.0768102	1	-0.126888	0.492827	-0.0944391	0.784051	0.260063
AFLA_012890	-0.610966	0.735566	-1.77636e-15	1	-3.28679	0.00354011	-2.17894	0.0703827	-1.98501	0.0419634	-2.96916	0.00789308	-0.610966	1	-1.10785	0.436354	0.984144	0.666304	0.0288284
AFLA_012900	1.77636e-15	1	-1.77636e-15	1	-1.67997	0.0539819	-0.431617	0.715138	-1.4549	0.0557173	-1.11609	0.207508	3.55271e-15	1	-1.24835	0.22483	-0.338806	0.925042	0.677429
AFLA_012910	0.726894	0.282352	1.30748	0.0377528	2.78981	2.542e-06	3.78971	2.30393e-08	2.2877	8.26804e-06	1.98115	0.000333365	-0.58059	0.988333	-0.999903	0.0978926	0.306546	0.833329	0.285239
AFLA_012920	-2.07197	0.0744798	-0.934968	0.499122	-0.229232	0.885559	1.01994	0.370576	3.17932	0.000377718	3.64823	0.000328138	-1.137	0.965279	-1.24917	0.293076	-0.468905	0.885116	0.421433
AFLA_012930	-0.610966	0.722853	-8.88178e-16	1	1.61662	0.138694	1.12252	0.366879	2.6516	0.00521374	3.13319	0.00377948	-0.610966	1	0.494101	0.779927	-0.481597	0.897727	1
AFLA_012940	1.65893	0.0636089	1.42825	0.119755	1.77896	0.0191814	3.02118	0.00030206	1.80644	0.00698022	0.777341	0.325385	0.230681	1	-1.24222	0.155138	1.0291	0.409139	1
AFLA_012950	-0.943076	0.457963	-0.842385	0.533547	1.18934	0.221772	1.69566	0.096874	0.588689	0.509752	1.21122	0.206461	-0.10069	1	-0.506315	0.727182	-0.62253	0.787597	1.53894e-06
AFLA_012960	-1.91594	3.26352e-14	-1.66089	1.25841e-12	-0.396444	0.00635468	-0.619916	0.00011653	-0.759909	2.28815e-07	-0.968108	2.10232e-08	-0.255044	0.731369	0.223471	0.184409	0.2082	0.373493	0.000100901
AFLA_012970	0.972981	0.00903036	0.0933502	0.918993	-1.81385	6.3402e-07	-0.944487	0.00608633	1.14264	0.000116205	0.618508	0.0534793	0.879631	0.295094	-0.869368	0.0141126	0.524134	0.289056	0.0704015
AFLA_012980	-1.10375	0.382231	-2.02202	0.0796324	1.08619	0.28196	-0.705499	0.553165	1.48776	0.0788038	1.31286	0.180541	0.918268	1	1.79169	0.101074	0.174902	1	0.0187095
AFLA_012990	1.77636e-15	1	-1.77636e-15	1	0.264887	0.855507	-0.658923	0.592382	-0.972729	0.26805	0.716322	0.502398	3.55271e-15	1	0.923809	0.465217	-1.68905	0.251021	0.398631
AFLA_013000	1.77636e-15	1	-1.77636e-15	1	-0.720689	0.476873	-1.95127	0.0485808	0.367526	0.696178	-1.43376	0.121799	3.55271e-15	1	1.23058	0.263947	1.80129	0.177505	0.74492
AFLA_013010	-2.39265	0.0278393	-3.01539	0.00569959	-0.952364	0.334592	-0.314076	0.832243	3.15887	0.000219117	3.28105	0.000607174	0.62274	1	-0.638288	0.628583	-0.122182	1	0.586925
AFLA_013020	0.538125	0.509197	1.4097	0.0428703	-2.24393	0.000247263	-1.72358	0.00642052	0.363574	0.516747	0.0856265	0.943418	-0.871574	0.86656	-0.520354	0.503646	0.277947	0.888089	0.0192039
AFLA_013030	-1.13596	7.79273e-05	-1.27285	1.54219e-05	-0.731953	0.00241267	-0.723897	0.0046283	1.07374	3.52498e-06	0.607725	0.0106594	0.136885	1	-0.00805573	1	0.466011	0.177226	0.736978
AFLA_013040	-1.09552	3.89893e-06	-0.993647	2.01083e-05	-0.517069	0.00652991	-0.223568	0.298454	0.199474	0.237663	0.137764	0.503785	-0.10187	1	-0.293501	0.182566	0.0617098	0.951381	0.000286942
AFLA_013050	-0.193803	0.629379	-0.586154	0.0679108	-0.249327	0.390453	-0.378923	0.206101	0.454685	0.0540893	0.165209	0.5832	0.392352	0.874232	0.129597	0.766095	0.289476	0.55694	9.19895e-05
AFLA_013060	-2.59719	0.0011457	-2.33634	0.00329458	-1.51264	0.0260053	-2.49328	0.000761629	0.89963	0.132596	1.21544	0.0735788	-0.260848	1	0.980645	0.222087	-0.315811	0.891199	0.328498
AFLA_013070	-1.00879	2.22493e-06	-0.813534	7.06784e-05	-0.7866	1.51923e-05	-0.891354	5.24576e-06	-0.0174033	0.963121	-0.392611	0.019468	-0.195255	0.964121	0.104754	0.670524	0.375208	0.112863	9.91877e-09
AFLA_013080	0.0555953	1	-0.119953	0.926776	-0.433208	0.338625	0.0684464	0.959566	0.990552	0.00849458	0.649768	0.131455	0.175548	1	-0.501655	0.339516	0.340785	0.717285	0.059762
AFLA_013090	-0.270317	0.608579	-0.292779	0.581695	-0.34968	0.363144	-0.200353	0.673518	1.04755	0.00119637	1.00587	0.00548061	0.0224616	1	-0.149327	0.809363	0.0416719	1	0.0184503
AFLA_013100	-1.95226	0.0967824	-0.979611	0.474511	1.17762	0.251268	-0.344014	0.82407	2.77956	0.00162378	1.94382	0.0481691	-0.972648	1	1.52164	0.186042	0.835745	0.689317	1
AFLA_013110	-0.08933	1	-0.9248	0.64247	0.490357	0.768621	-0.761742	0.650994	1.01628	0.394123	-1.90638	0.144861	0.83547	1	1.2521	0.450967	2.92267	0.106318	0.820342
AFLA_013120	-2.41816	0.0196021	-2.89456	0.00545525	-2.01611	0.0236667	-2.24073	0.018755	1.84169	0.0182502	-0.305842	0.788552	0.476401	1	0.224624	0.920961	2.14753	0.0820472	0.176625
AFLA_013130	-1.07173	0.000332124	-1.18297	9.827e-05	0.149958	0.606515	0.0451903	0.946277	0.185369	0.426766	0.467486	0.0624218	0.111238	1	0.104768	0.808269	-0.282118	0.531245	1
AFLA_013140	-2.09635	0.000623805	-2.47679	8.11771e-05	-0.335133	0.571419	-1.06996	0.0550513	-0.479524	0.305557	0.381983	0.498405	0.380442	1	0.734827	0.231816	-0.861507	0.277203	0.000406141
AFLA_013150	-0.560258	0.465239	-0.387908	0.660309	0.00342582	1	-0.489285	0.471028	1.82798	0.000385102	3.36068	2.35035e-07	-0.17235	1	0.492711	0.510739	-1.53271	0.0455069	0.833312
AFLA_013160	-1.5478	0.11291	-1.35042	0.179662	3.10366	0.000248333	2.35046	0.0072079	2.71382	0.000271129	4.05597	5.47192e-06	-0.197382	1	0.753201	0.478009	-1.34215	0.284071	0.0810132
AFLA_013170	-1.14609	0.0237318	-1.44485	0.00456047	-0.897589	0.0394463	-1.62176	0.000650226	-0.631334	0.0985999	-0.473515	0.292926	0.298757	1	0.724173	0.147623	-0.157819	0.936123	1
AFLA_013180	-5.71593	7.57585e-08	-5.2265	4.45607e-07	-9.00877	9.33544e-14	-7.29617	7.59034e-11	-2.32495	0.00116384	-2.60364	0.00133627	-0.489429	1	-1.7126	0.0543	0.278689	0.941969	0.19886
AFLA_013190	-0.0312992	1	1.91299	0.0545589	1.0904	0.207791	1.35716	0.139784	2.03481	0.00603928	0.791674	0.370511	-1.94429	0.465705	-0.266761	0.876067	1.24314	0.355061	2.73805e-05
AFLA_013200	0.689324	0.720802	-0.819531	0.663812	2.88124	0.0168605	2.43776	0.060161	1.29875	0.226841	2.02466	0.0936771	1.50886	0.940401	0.443478	0.841103	-0.725905	0.818329	1.05174e-11
AFLA_013210	1.77636e-15	1	-0.91651	0.323499	1.81529	0.0116669	-0.168285	0.90787	-5.14593	3.13387e-10	-4.75966	2.58312e-08	0.91651	0.929725	1.98357	0.0122923	-0.386265	0.85276	0.316756
AFLA_013220	-1.38173	0.0677271	-1.81699	0.0153134	-0.24641	0.764018	1.10327	0.114061	-0.123267	0.884273	-0.286962	0.706319	0.435257	1	-1.34968	0.059516	0.163695	0.984517	0.132857
AFLA_013230	-1.25869	0.0369959	-1.41864	0.0187935	-1.28173	0.013284	-0.246919	0.728066	-3.15248	1.14136e-08	-2.89014	6.99398e-07	0.159947	1	-1.03481	0.0736754	-0.262338	0.868028	0.406946
AFLA_013240	0.696257	0.509211	1.41484	0.125847	0.309985	0.746136	0.595814	0.520865	-0.514481	0.472217	-0.333302	0.714128	-0.718586	1	-0.285829	0.837293	-0.181179	0.990496	0.820342
AFLA_013250	-0.554749	0.430445	-0.777698	0.241614	0.808733	0.130994	-0.116216	0.917145	1.8367	0.000154341	1.437	0.00658633	0.222949	1	0.924949	0.123465	0.399701	0.736403	0.373945
AFLA_013260	-0.565545	0.0556981	-0.795842	0.00673681	-1.3148	2.4703e-06	-1.4287	1.58423e-06	-0.0110702	1	-0.349141	0.170771	0.230297	1	0.113894	0.783381	0.338071	0.414429	1
AFLA_013270	-8.94866	1.75359e-11	-9.05018	1.27604e-11	-5.74376	2.61965e-08	-5.94016	4.21742e-08	-4.75418	9.34799e-08	-4.81562	7.40272e-07	0.101522	1	0.196399	0.935674	0.0614436	1	0.00033433
AFLA_013280	-0.625554	0.762205	-1.66536	0.291732	0.480694	0.759618	0.370977	0.859389	1.23081	0.265585	1.64392	0.189702	1.03981	1	0.109716	1	-0.413112	0.948577	0.435951
AFLA_013290	1.77636e-15	1	-1.77636e-15	1	3.55271e-15	1	8.88178e-16	1	-1.6393	0.000621271	-1.77636e-15	1	3.55271e-15	1	2.66454e-15	1	-1.6393	0.0196687	0.0754046
AFLA_013300	0.118109	0.990632	0.989683	0.256387	-0.201021	0.838662	1.73358	0.0187563	4.17513	1.35429e-08	4.13261	1.94614e-07	-0.871574	0.93585	-1.93461	0.0111886	0.0425192	1	0.480619
AFLA_013310	-2.21141	0.0140237	-1.75602	0.0558644	0.686193	0.412666	-0.798659	0.374212	0.44873	0.544978	1.06186	0.176591	-0.455391	1	1.48485	0.0894997	-0.613126	0.719484	0.0491004
AFLA_013320	-1.24196	1.56174e-06	-1.2987	7.08804e-07	-0.376688	0.065067	-0.7812	0.000456825	-0.337789	0.0576215	-0.0589223	0.830559	0.0567373	1	0.404512	0.0760028	-0.278866	0.401512	0.393111
AFLA_013330	-2.91973	0.000290216	-2.34549	0.00308538	-0.770695	0.275558	-0.601317	0.456217	-0.0716512	0.960924	-0.0982813	0.943418	-0.574234	1	-0.169378	0.921723	0.0266301	1	0.139542
AFLA_013340	-0.336583	0.261983	-0.0395839	0.997081	-0.424906	0.076621	0.189678	0.512116	0.39559	0.0581342	0.135381	0.616021	-0.296999	0.941629	-0.614583	0.0197057	0.260209	0.548694	0.862181
AFLA_013350	-0.129341	0.996032	0.326978	0.834229	-1.7486	0.0272962	-1.4726	0.0859545	0.949494	0.176426	0.780021	0.34683	-0.456319	1	-0.276006	0.854455	0.169473	1	3.34082e-13
AFLA_013360	0.38527	0.339717	0.172789	0.746808	0.515562	0.103861	0.663951	0.0486418	-0.758447	0.00610364	-0.308511	0.346896	0.21248	1	-0.148389	0.771109	-0.449936	0.374993	0.0105252
AFLA_013370	0.597729	0.157046	0.678796	0.105084	2.00274	4.54809e-07	1.49939	0.000111125	3.12539	1.32494e-12	2.09348	1.83606e-07	-0.0810669	1	0.503356	0.221462	1.03191	0.0259794	0.0065198
AFLA_013380	0.461934	0.544367	0.461934	0.558237	0.641466	0.255051	0.641466	0.297352	0.702595	0.141088	0.702595	0.202524	3.55271e-15	1	2.66454e-15	1	1.77636e-15	1	0.0219162
AFLA_013390	1.77636e-15	1	-1.77636e-15	1	0.571832	0.138987	0.571832	0.172345	0.391068	0.250472	0.391068	0.322707	3.55271e-15	1	2.66454e-15	1	1.77636e-15	1	1
AFLA_013400	-0.464441	0.112089	-0.459111	0.119953	-0.792568	0.00143222	-0.65491	0.0122637	2.57647	1.97188e-14	2.56607	5.91332e-13	-0.00533007	1	-0.137658	0.709982	0.010405	1	0.0776728
AFLA_013410	-0.509155	0.28815	-0.691206	0.132544	1.66367	3.71312e-05	0.788635	0.0526449	1.16739	0.000643094	0.77065	0.0409977	0.18205	1	0.875034	0.0377134	0.396745	0.570372	1
AFLA_013420	-1.6739	0.029384	-1.28912	0.104037	-0.105039	0.944563	-1.02041	0.158948	0.741241	0.205967	0.579762	0.407275	-0.38478	1	0.915376	0.242694	0.161479	0.988408	0.386078
AFLA_013430	1.77636e-15	1	-0.91651	0.440575	-1.21826	0.171859	-0.461471	0.692072	-0.522561	0.528652	0.940431	0.296636	0.91651	0.997216	-0.756789	0.511158	-1.46299	0.269376	0.0215533
AFLA_013440	-3.43255	1.41082e-06	-2.74944	5.38509e-05	0.222364	0.752795	-0.0814034	0.968966	-0.258271	0.641719	0.0824837	0.941865	-0.683109	0.942711	0.303767	0.722971	-0.340755	0.813663	0.0465078
AFLA_013450	0.544295	0.769643	2.08766	0.115166	-1.36823	0.228732	-0.844454	0.528015	-3.3706	0.000673192	-2.63103	0.0162849	-1.54336	0.890698	-0.52378	0.768341	-0.739571	0.781809	1
AFLA_013460	1.77636e-15	1	-1.3158	0.0979763	3.55271e-15	1	8.88178e-16	1	-2.06969	0.000558542	-0.879749	0.191241	1.3158	0.626292	2.66454e-15	1	-1.18994	0.226185	1
AFLA_013470	-1.16395	0.499193	-4.47871	0.00228467	-1.44994	0.266657	-1.39859	0.330243	-2.94499	0.00755743	-0.595368	0.683948	3.31475	0.326429	-0.0513565	1	-2.34962	0.20155	0.000909031
AFLA_013480	-2.15636	0.000534226	-1.88773	0.00224166	-0.747999	0.16479	-0.419345	0.511289	-0.769348	0.0958017	-0.632061	0.241666	-0.268629	1	-0.328654	0.668985	-0.137287	0.981681	0.462923
AFLA_013490	1.77636e-15	1	-1.77636e-15	1	3.55271e-15	1	8.88178e-16	1	0	1	-1.77636e-15	1	3.55271e-15	1	2.66454e-15	1	1.77636e-15	1	1
AFLA_013500	1.77636e-15	1	-1.77636e-15	1	3.55271e-15	1	8.88178e-16	1	0	1	-1.77636e-15	1	3.55271e-15	1	2.66454e-15	1	1.77636e-15	1	1
AFLA_013510	-4.16132	0.00300282	-3.74066	0.00773496	-0.626015	0.660782	-2.30549	0.0758258	3.3761	0.00167892	2.56951	0.0319863	-0.420658	1	1.67947	0.239348	0.806591	0.784051	0.010408
AFLA_013520	-5.74534	8.91543e-15	-5.31398	6.03556e-14	-4.30028	7.65773e-13	-3.54134	3.40524e-10	-6.56065	2.25924e-19	-6.79449	3.33375e-18	-0.431357	0.997216	-0.758935	0.104299	0.233835	0.837615	0.0105646
AFLA_013530	-5.62618	4.05443e-07	-5.51138	6.06133e-07	-4.8598	5.77026e-07	-2.49959	0.00644994	-2.5704	0.00084957	-1.89338	0.0263439	-0.114805	1	-2.36021	0.0124891	-0.677022	0.719582	0.000145538
AFLA_013540	-3.46044	5.78598e-06	-3.08877	3.64569e-05	-4.24706	1.07559e-08	-3.54727	1.09998e-06	-2.91292	1.38402e-06	-3.01308	6.24527e-06	-0.371668	1	-0.699793	0.354236	0.100163	1	0.31832
AFLA_013550	-2.18206	0.00371194	-1.58246	0.0373548	-0.758259	0.259446	0.276417	0.764765	-1.6014	0.00502155	-1.83375	0.00473027	-0.599601	1	-1.03468	0.165681	0.232352	0.937366	7.54997e-05
AFLA_013560	-2.28829	2.48392e-08	-2.2051	5.46261e-08	-1.65776	1.1075e-06	-1.11709	0.000717215	0.773298	0.00392889	0.630097	0.0365806	-0.0831891	1	-0.54067	0.115995	0.143202	0.88746	8.97765e-07
AFLA_013570	-0.932395	0.4093	-0.665952	0.601885	-0.905652	0.313453	0.706491	0.493289	3.62473	9.44523e-06	2.13334	0.0123883	-0.266444	1	-1.61214	0.0948723	1.4914	0.24352	0.175782
AFLA_013580	-1.9739	0.0830343	0.0499299	1	-0.902315	0.380771	-1.86239	0.072313	0.221311	0.849062	0.999531	0.316276	-2.02383	0.563033	0.960071	0.433088	-0.77822	0.710163	1
AFLA_013590	-1.87407	7.31307e-09	-1.60424	1.88308e-07	-1.63039	1.02698e-08	-1.38045	8.23147e-07	-0.46957	0.0219399	-0.262755	0.276711	-0.269824	0.966394	-0.249944	0.394751	-0.206814	0.665881	0.468188
AFLA_013600	0.947764	0.0597459	0.947764	0.0621128	3.55271e-15	1	8.88178e-16	1	0	1	-1.77636e-15	1	3.55271e-15	1	2.66454e-15	1	1.77636e-15	1	0.421433
AFLA_013610	-3.15992	4.42756e-10	-4.53194	4.63753e-14	2.44978	8.56161e-09	0.729058	0.0518308	-1.37394	2.89009e-05	-1.21611	0.000666108	1.37202	0.0503185	1.72072	2.63874e-05	-0.157827	0.896061	0.000276868
AFLA_013620	-5.46979	1.90417e-06	-7.30632	6.27367e-09	3.81124	6.77032e-05	0.1269	0.973251	-1.00141	0.214221	0.457059	0.662655	1.83654	0.606486	3.68434	0.000322319	-1.45847	0.298881	0.0548619
AFLA_013630	-8.03215	1.891e-08	-10.1398	9.73336e-11	4.7414	2.46499e-05	-0.30935	0.863705	-0.133594	0.942544	-1.49495	0.159421	2.10764	0.617102	5.05075	3.71343e-05	1.36136	0.436696	0.335979
AFLA_013640	-10.404	5.51934e-16	-12.5694	2.47375e-18	4.53831	2.33006e-08	-0.668431	0.398615	-5.52666	1.47979e-11	-5.40452	4.73109e-10	2.16536	0.165113	5.20674	7.77887e-09	-0.122143	1	0.243964
AFLA_013650	-1.57485	0.0642521	-1.653	0.0535475	1.68012	0.020078	0.77131	0.355462	-0.827171	0.197414	-0.534579	0.496445	0.0781467	1	0.908806	0.298837	-0.292593	0.916384	0.14541
AFLA_013660	-0.953244	0.111225	-1.44842	0.0131126	0.449504	0.405243	0.159263	0.846056	-0.469049	0.298172	-0.49173	0.347606	0.495171	1	0.290241	0.699333	0.0226815	1	0.104568
AFLA_013670	-0.562746	0.348979	-0.576847	0.340867	0.0816281	0.931274	0.815334	0.106989	-0.801158	0.048876	-0.623205	0.187128	0.0141011	1	-0.733706	0.174234	-0.177952	0.928014	0.0853791
AFLA_013680	-0.147371	0.838464	-2.69136	6.92187e-08	1.53502	9.39341e-05	0.0974894	0.888586	-1.47558	2.80254e-05	-1.80519	8.63582e-06	2.54398	0.000118052	1.43753	0.000616466	0.329608	0.666304	0.0891725
AFLA_013690	0.399636	0.0285461	0.222172	0.263261	-0.407967	0.00943866	0.200525	0.254442	-1.35562	3.32265e-12	-1.28313	2.53052e-10	0.177464	0.976469	-0.608492	0.000546848	-0.0724924	0.891435	0.140714
AFLA_013700	1.00289	3.95377e-07	0.661236	0.000281109	1.44803	7.78736e-12	1.9202	2.16248e-14	0.199941	0.136393	0.391341	0.0101945	0.341656	0.496723	-0.472171	0.00518383	-0.1914	0.458264	0.0298153
AFLA_013710	-0.124089	0.594037	-0.104449	0.684084	-0.393177	0.0146289	-0.586229	0.00081446	0.14059	0.335158	-0.212233	0.19383	-0.0196397	1	0.193052	0.325846	0.352823	0.118673	0.459751
AFLA_013720	0.0502443	0.981452	0.17117	0.695049	0.2043	0.494255	0.314046	0.308251	1.93949	3.08344e-10	1.63288	1.66883e-07	-0.120926	1	-0.109745	0.814895	0.306604	0.523007	3.12629e-06
AFLA_013730	0.174569	0.966248	-0.00261679	1	-2.29227	0.00652061	-2.18072	0.0149945	-1.08841	0.140741	-0.751138	0.397541	0.177185	1	-0.111556	0.995366	-0.337275	0.917562	6.24517e-10
AFLA_013740	-2.99433	1.10645e-05	-4.19936	2.09513e-08	-5.0369	1.98312e-11	-6.79837	3.71334e-14	-3.21918	2.80815e-08	-3.53707	4.9721e-08	1.20503	0.520016	1.76147	0.00396666	0.317886	0.83099	3.14766e-05
AFLA_013750	0.365275	0.805399	-0.0321003	1	-4.18948	4.13137e-06	-5.44588	9.95468e-08	-3.48646	1.0422e-05	-4.3015	2.5723e-06	0.397375	1	1.2564	0.193807	0.81504	0.605368	0.833312
AFLA_013760	0.447658	0.840663	1.27908	0.404809	-4.06614	0.000553656	-3.98114	0.00134981	-1.04056	0.31503	0.784529	0.532723	-0.831418	1	-0.0849949	1	-1.82509	0.305072	1
AFLA_013770	1.81741	0.155232	1.52231	0.253423	-0.605332	0.623229	-2.10619	0.0637242	-1.61427	0.0807857	-0.561455	0.641774	0.295102	1	1.50086	0.229429	-1.05282	0.597455	0.00277573
AFLA_013780	1.7388	0.0643651	0.970197	0.353162	-2.01226	0.0119651	-2.91809	0.000794558	-2.36393	0.000982751	0.002294	1	0.768602	1	0.905834	0.358988	-2.36623	0.0259582	0.606393
AFLA_013790	1.77636e-15	1	-1.77636e-15	1	-1.05899	0.154049	-0.435518	0.644597	1.01473	0.112547	4.55748	8.36038e-08	3.55271e-15	1	-0.623469	0.518849	-3.54275	0.000203508	1
AFLA_013800	1.77636e-15	1	-1.77636e-15	1	3.55271e-15	1	8.88178e-16	1	0.702595	0.0117998	0.702595	0.0264701	3.55271e-15	1	2.66454e-15	1	1.77636e-15	1	0.419005
AFLA_013810	-0.642458	0.613166	-8.88178e-16	1	1.86911	0.0307954	3.51907	0.00023144	6.96138	2.07741e-11	5.15355	2.20984e-07	-0.642458	1	-1.64996	0.0911061	1.80782	0.144358	0.899016
AFLA_013820	0.139126	0.951487	1.46504	0.0400492	4.5443	1.9913e-09	4.12414	5.14459e-08	5.82773	2.14425e-13	4.69018	9.09003e-10	-1.32592	0.519703	0.420154	0.621299	1.13755	0.201329	0.0571792
AFLA_013830	0.590769	0.111007	0.271568	0.544135	2.55636	2.34754e-10	1.2475	0.000260332	1.1327	8.17651e-05	1.50559	7.84292e-06	0.319201	0.997216	1.30885	0.000207376	-0.372885	0.483368	0.409877
AFLA_013840	-0.322078	0.723008	-0.0395265	1	2.66454e-15	1	0	1	0	1	-8.88178e-16	1	-0.282552	1	2.66454e-15	1	8.88178e-16	1	1
AFLA_013850	1.77636e-15	1	-1.77636e-15	1	3.55271e-15	1	8.88178e-16	1	0	1	-1.77636e-15	1	3.55271e-15	1	2.66454e-15	1	1.77636e-15	1	1
AFLA_013860	0.891674	2.70084e-08	1.14256	1.02026e-10	1.00478	1.214e-10	0.771188	1.26139e-07	1.92898	1.18849e-19	2.24645	5.89529e-20	-0.250886	0.559166	0.233595	0.0790013	-0.317472	0.0479101	0.421
AFLA_013870	-0.482905	0.0263599	-0.599002	0.00601298	0.366883	0.0497736	0.273595	0.184475	0.46648	0.00471242	0.237429	0.212276	0.116097	1	0.093288	0.752505	0.229051	0.472463	0.14696
AFLA_013880	-5.13283	6.51026e-13	-4.1747	1.16998e-10	-1.61731	0.000327162	-1.68205	0.000427826	1.50219	0.000172497	-0.553947	0.212021	-0.958134	0.515628	0.0647463	0.986087	2.05614	0.000292586	0.170993
AFLA_013890	-0.666945	0.216129	-0.281186	0.687023	-0.192324	0.718762	0.89479	0.05642	1.07236	0.00537999	0.741142	0.089763	-0.385759	1	-1.08711	0.0243862	0.331213	0.735496	0.000809778
AFLA_013900	-0.375579	0.332992	-0.340087	0.399493	-1.19232	0.000156595	-0.646948	0.046103	0.662146	0.0124709	0.449288	0.140237	-0.0354916	1	-0.545375	0.11138	0.212858	0.765399	0.00188189
AFLA_013910	-1.42611	0.126265	-1.54197	0.0977824	-1.0718	0.17738	-0.696577	0.450093	0.835345	0.227355	1.26829	0.103276	0.115861	1	-0.375221	0.763475	-0.432949	0.842825	1
AFLA_013920	1.77636e-15	1	-1.77636e-15	1	3.55271e-15	1	8.88178e-16	1	0	1	-1.77636e-15	1	3.55271e-15	1	2.66454e-15	1	1.77636e-15	1	1
AFLA_013930	-0.107107	1	0.50386	0.715057	2.15458	0.0102133	2.15458	0.0159945	0.773013	0.305714	-1.19816	0.156809	-0.610966	1	2.66454e-15	1	1.97117	0.0896182	0.00693164
AFLA_013940	-2.45309	0.000647437	-3.09977	3.26607e-05	-0.873953	0.160111	-0.5059	0.4909	1.31475	0.0137832	1.19011	0.0499153	0.646677	0.994955	-0.368053	0.681683	0.124639	1	1
AFLA_013950	2.66454e-15	1	-8.88178e-16	1	-2.30128	0.0164361	-1.14117	0.294355	-1.94471	0.0204574	-2.6155	0.00649945	3.55271e-15	1	-1.16011	0.321204	0.670793	0.768028	5.88022e-06
AFLA_013960	-1.23535	0.00506005	-1.47196	0.000984441	-1.95494	3.05628e-06	-1.35438	0.0010075	-0.341498	0.319153	-0.423357	0.278808	0.236607	1	-0.600566	0.171498	0.081859	0.999765	0.176625
AFLA_013970	0.485823	0.517025	0.485823	0.530863	1.17635	0.0295088	1.17635	0.0424622	0.391068	0.437057	0.391068	0.506887	3.55271e-15	1	2.66454e-15	1	1.77636e-15	1	0.00202764
AFLA_013980	-0.215673	0.0993166	-0.211462	0.109796	-0.421802	0.00021881	-0.212181	0.0732712	-0.0878433	0.383631	-0.163036	0.141001	-0.00421078	1	-0.209621	0.0905991	0.0751925	0.77647	0.573695
AFLA_013990	0.990075	0.151493	1.1227	0.101009	1.07279	0.0606478	0.696525	0.280389	0.162329	0.798222	0.267574	0.688917	-0.132629	1	0.376265	0.644165	-0.105245	1	1
AFLA_014000	-1.14659	3.96563e-05	-1.09658	7.96197e-05	0.0764539	0.805077	-0.12938	0.667325	-1.03744	3.31745e-06	-0.822708	0.000483694	-0.0500034	1	0.205834	0.493896	-0.214734	0.636036	0.0309147
AFLA_014010	-0.557853	0.185334	-1.85035	1.3991e-05	2.8872	1.5684e-10	2.18543	2.02207e-07	2.84389	1.04858e-11	3.24147	9.11272e-12	1.29249	0.0663081	0.701767	0.0682549	-0.397584	0.510961	6.78282e-07
AFLA_014020	-1.74913	1.22623e-06	-1.87919	3.32256e-07	-0.0547009	0.917209	-0.07884	0.874766	1.05607	6.05298e-05	1.42664	4.22823e-06	0.130066	1	0.0241391	1	-0.37057	0.429498	0.615107
AFLA_014030	-1.91872	0.00952038	-1.79243	0.0161243	-2.54284	0.000137189	-1.73439	0.0110202	-1.53404	0.00637033	-1.85489	0.00386518	-0.126285	1	-0.808455	0.294194	0.320858	0.870297	1.40871e-07
AFLA_014040	3.20142	0.0003165	0.22748	0.909891	-1.47133	0.0494587	-0.880281	0.300732	-2.48836	0.000268036	-2.25608	0.00281018	2.97394	0.0457894	-0.591049	0.560017	-0.232283	0.95987	0.058246
AFLA_014050	-0.21714	0.299602	-0.280634	0.165144	1.11098	2.01119e-08	0.893946	3.47339e-06	0.248337	0.0856257	0.365009	0.0261719	0.0634939	1	0.217032	0.271923	-0.116672	0.763947	0.972341
AFLA_014060	-1.27467	0.189429	-0.649843	0.577153	0.532103	0.553183	-0.0196683	1	1.54387	0.0259371	0.924227	0.256318	-0.624825	1	0.551771	0.619483	0.619646	0.724241	1
AFLA_014070	0.122005	1	-1.1829	0.227346	-2.54216	0.00140707	-2.49168	0.00309527	-3.78889	1.03673e-06	-4.33874	8.28095e-07	1.3049	0.778132	-0.0504707	1	0.549848	0.766484	0.670121
AFLA_014080	2.66454e-15	1	-8.88178e-16	1	0.221274	0.685601	0.571832	0.264715	0.390258	0.345563	0.390258	0.420335	3.55271e-15	1	-0.350557	0.572287	1.77636e-15	1	1
AFLA_014090	1.28241	4.94062e-05	0.495855	0.114434	0.402632	0.127436	0.485472	0.0847716	-0.212813	0.372134	-0.248227	0.364047	0.786554	0.201329	-0.08284	0.87582	0.035414	1	0.820342
AFLA_014100	-0.300687	0.181236	-0.504433	0.0190493	0.774828	6.67439e-05	0.475492	0.0156781	-1.24277	1.23543e-09	-1.15296	8.13876e-08	0.203745	0.985345	0.299336	0.157538	-0.0898163	0.879743	0.512953
AFLA_014110	-1.88612	0.026031	-0.909329	0.336075	-1.17613	0.110224	-1.0575	0.188706	-1.09255	0.0868576	-0.595463	0.444979	-0.976789	0.915021	-0.118624	0.978944	-0.497085	0.777304	0.0276998
AFLA_014120	-0.653816	0.000891634	-0.705217	0.000391923	-0.933279	7.72628e-07	-0.640193	0.000467977	-0.0649805	0.705335	0.0565342	0.792357	0.0514012	1	-0.293086	0.123018	-0.121515	0.754784	0.820342
AFLA_014130	-1.89151	1.83537e-06	-1.36922	0.000250532	-1.46099	1.48283e-05	-1.28601	0.000200074	-0.776851	0.00493136	-0.692513	0.0261527	-0.522285	0.777463	-0.174979	0.712127	-0.0843385	0.977883	0.833312
AFLA_014140	-1.24546	8.35795e-07	-1.15647	3.23847e-06	0.0196647	0.990782	-0.610328	0.00394686	-0.209739	0.232907	-0.336754	0.0877269	-0.0889841	1	0.629993	0.00396744	0.127015	0.797559	0.833312
AFLA_014150	-1.62378	0.00153634	-1.6981	0.000993319	0.0659623	0.950713	-0.265191	0.639169	0.120449	0.807236	0.588131	0.185419	0.0743189	1	0.331153	0.580983	-0.467683	0.558144	0.712825
AFLA_014160	4.25381	0.00112375	3.83647	0.0031542	5.61131	4.30788e-06	3.60964	0.00257546	2.66818	0.00644277	3.61452	0.00136192	0.417338	1	2.00167	0.11218	-0.946345	0.686373	0.0393206
AFLA_014170	-0.295321	0.890546	0.526509	0.734598	2.00366	0.0299998	0.252654	0.878635	1.71896	0.0333594	2.3134	0.0121137	-0.82183	1	1.751	0.0929745	-0.594439	0.797915	1
AFLA_014180	0.4619	0.785579	0.4619	0.794445	2.3255	0.0173163	1.96739	0.0613648	1.27501	0.13848	1.32042	0.182933	3.55271e-15	1	0.358113	0.84175	-0.0454067	1	1
AFLA_014190	1.03241	0.535364	1.72704	0.249892	4.04793	0.000876612	4.45488	0.000609552	3.2081	0.00243808	3.06952	0.00984533	-0.694635	1	-0.40695	0.859056	0.13858	1	1
AFLA_014200	0.485823	0.704097	0.485823	0.717921	2.27392	0.00546101	2.62369	0.00274851	2.25415	0.00188817	1.82298	0.0244341	3.55271e-15	1	-0.349776	0.799369	0.431163	0.857452	3.7901e-05
AFLA_014210	0.365131	0.588735	0.442212	0.50174	2.32145	5.67222e-06	1.74331	0.000635999	-0.00498816	1	-0.0101131	1	-0.0770814	1	0.578146	0.309072	0.00512495	1	1
AFLA_014220	-1.30313	0.293544	-0.508908	0.765657	-1.38654	0.165692	-2.36553	0.0238046	-0.12774	0.939992	-1.01078	0.320223	-0.794224	1	0.978987	0.432356	0.88304	0.656514	0.932509
AFLA_014230	-4.42179	3.27307e-09	-4.68548	8.88059e-10	-0.81945	0.129503	-0.515204	0.409143	0.64343	0.172737	0.891215	0.0950741	0.263682	1	-0.304246	0.705116	-0.247785	0.891199	0.00443891
AFLA_014240	-3.08774	0.00121649	-4.89056	2.09755e-06	-0.937564	0.268687	-1.2002	0.181139	-2.56409	0.000500367	-2.14566	0.00835291	1.80282	0.506397	0.262638	0.872529	-0.418432	0.865361	0.244821
AFLA_014250	-1.71107	0.0468537	-3.33376	0.000158938	1.19916	0.106388	1.78731	0.0228844	0.233587	0.768446	1.19171	0.106004	1.62269	0.511683	-0.588151	0.552897	-0.958125	0.432368	1
AFLA_014260	1.30208	0.0981767	0.512617	0.604581	-2.96872	2.69301e-05	-3.49878	5.15933e-06	2.35199	0.000116118	3.07013	1.57312e-05	0.78946	0.950946	0.530055	0.552385	-0.71814	0.550443	0.714505
AFLA_014270	-0.161856	0.898937	-0.378651	0.63883	-1.46916	0.00547974	0.210707	0.784012	0.227703	0.666388	-0.133295	0.859174	0.216795	1	-1.67986	0.00398304	0.360998	0.77549	0.575296
AFLA_014280	-3.90235	4.14937e-09	-3.56168	2.99465e-08	-3.49813	3.01053e-09	-3.1256	1.01097e-07	-2.00408	1.03034e-05	-2.23838	1.26003e-05	-0.34067	1	-0.372533	0.563888	0.234301	0.876607	0.017402
AFLA_014290	0.688959	0.00430194	0.53033	0.0293375	-0.33586	0.109436	-0.154516	0.543041	-0.247972	0.177341	-0.534844	0.00988108	0.158629	1	-0.181344	0.50785	0.286871	0.397389	0.827861
AFLA_014300	-0.118006	0.754861	-0.140911	0.704369	-1.20139	2.05408e-06	-1.12022	1.62503e-05	0.890246	3.15047e-05	0.615815	0.00688581	0.0229049	1	-0.0811698	0.848993	0.274431	0.482203	0.765387
AFLA_014310	0.183722	0.58813	0.146165	0.702627	0.838266	0.00051863	0.786582	0.00193675	-0.459893	0.0251283	-0.500849	0.0321344	0.0375569	1	0.0516838	0.940325	0.0409558	1	0.256185
AFLA_014320	-1.57681	0.174366	-1.85203	0.105747	1.47022	0.127967	0.120703	0.982441	-1.4089	0.0914305	-1.19883	0.217064	0.275217	1	1.34952	0.231451	-0.210075	0.998084	0.672027
AFLA_014330	-1.25733	0.263292	-0.785294	0.542946	-0.049627	1	0.943604	0.361554	0.303019	0.749905	-0.212544	0.871594	-0.472037	1	-0.993231	0.370965	0.515563	0.83127	0.000646719
AFLA_014340	-0.570229	0.00795899	-0.532158	0.0137747	-0.258994	0.171623	-0.424762	0.0321534	-0.879996	1.43157e-06	-0.900237	7.71191e-06	-0.0380712	1	0.165768	0.495356	0.0202412	1	0.403495
AFLA_014350	-0.0766967	0.630897	-0.272439	0.0305704	-0.0524545	0.683863	-0.16473	0.162604	-0.580124	1.34839e-07	-0.720143	2.03227e-08	0.195742	0.703043	0.112275	0.406191	0.140019	0.432368	0.000321026
AFLA_014360	-0.287033	0.0051796	-0.230783	0.0257852	0.254097	0.00429199	-0.0118702	0.977056	-0.0276656	0.772605	-0.0831004	0.371064	-0.0562501	1	0.265967	0.0064958	0.0554349	0.807736	0.190657
AFLA_014370	-1.24045	2.49481e-09	-1.13031	1.93748e-08	0.0780787	0.654798	0.216924	0.183278	-0.549141	6.44949e-05	-0.679266	1.81254e-05	-0.110138	1	-0.138846	0.466453	0.130125	0.66642	0.0553687
AFLA_014380	0.510503	0.671551	4.3201	9.71789e-06	-4.41954	6.77939e-07	-3.59079	4.88577e-05	-10.8044	1.27236e-17	-11.4414	8.72774e-17	-3.8096	0.00788326	-0.828751	0.400883	0.637004	0.709915	0.0340445
AFLA_014390	-1.11573	0.0441808	-0.687375	0.249892	0.103573	0.896709	0.184213	0.792832	-2.87903	1.23959e-08	-2.72805	4.10998e-07	-0.428356	1	-0.0806406	0.973699	-0.150979	0.955184	0.0916904
AFLA_014400	0.50386	0.779054	0.50386	0.788567	0.727481	0.535078	0.617959	0.648552	-1.87262	0.0401492	-1.06567	0.326615	2.66454e-15	1	0.109522	1	-0.806948	0.727659	1
AFLA_014410	2.66454e-15	1	0	1	-1.04297	0.175284	-2.3646	0.00344818	-0.426968	0.553732	-1.24652	0.0981066	2.66454e-15	1	1.32163	0.121877	0.819549	0.548614	0.107942
AFLA_014420	-1.43577	0.3227	-1.33174	0.374251	2.33032	0.0400725	1.23907	0.342387	-0.732693	0.493691	-0.0279812	1	-0.104026	1	1.09125	0.453885	-0.704711	0.810771	0.590558
AFLA_014430	0.485864	0.706732	0.485864	0.720872	3.55271e-15	1	8.88178e-16	1	0.287223	0.739521	0.624809	0.480718	3.55271e-15	1	2.66454e-15	1	-0.337586	0.913842	0.724987
AFLA_014440	-1.03965	0.0894467	-8.88178e-16	1	-0.349776	0.547977	0	1	-0.428048	0.363394	-8.88178e-16	1	-1.03965	0.612623	-0.349776	0.631595	-0.428048	0.698073	5.46352e-05
AFLA_014450	-1.3676	1.42447e-05	-1.03951	0.000596503	-1.79004	9.0606e-09	-1.02989	0.000257364	-0.216296	0.353406	-1.08248	6.00716e-05	-0.328095	0.928753	-0.760155	0.00716096	0.866189	0.00987521	0.000793858
AFLA_014460	-0.11721	0.877885	-0.304791	0.540372	-0.829612	0.0163757	-0.610874	0.103441	-0.192944	0.561038	-0.354331	0.323871	0.187582	1	-0.218737	0.662841	0.161387	0.889637	0.820342
AFLA_014470	-2.88372	6.464e-08	-2.73991	1.86305e-07	-1.46183	0.000394809	-0.993491	0.0201296	-0.302456	0.413006	0.0979794	0.86607	-0.143814	1	-0.468337	0.340362	-0.400436	0.596035	0.40596
AFLA_014480	-2.61006	2.32052e-07	-2.32122	2.10692e-06	-1.76431	2.06064e-05	-1.17026	0.00472186	-0.570172	0.092016	-0.380416	0.345941	-0.288841	1	-0.594044	0.186342	-0.189756	0.87768	0.0326481
AFLA_014490	0.0978878	0.786317	-0.151253	0.634418	-0.676386	0.00136761	-0.388653	0.0833746	0.283291	0.120466	-0.580662	0.00533956	0.249141	0.948084	-0.287733	0.243441	0.863953	0.00143169	4.462e-06
AFLA_014500	0.487556	0.00327661	0.536421	0.00135572	1.11259	8.02899e-10	0.892116	2.61828e-07	1.25018	2.29611e-12	1.36322	5.97654e-12	-0.0488647	1	0.22047	0.183576	-0.113042	0.718507	0.518119
AFLA_014510	0.546264	0.496863	0.00191975	1	-3.93297	2.12267e-08	-3.84675	1.01965e-07	-0.56413	0.282999	-0.89723	0.127518	0.544344	1	-0.0862231	0.986565	0.3331	0.835572	0.235699
AFLA_014520	-0.118992	0.891728	0.483503	0.316616	-5.00326	9.9709e-16	-4.32332	2.15675e-13	-6.87662	3.2632e-21	-6.80978	1.78424e-19	-0.602495	0.806846	-0.67994	0.108878	-0.0668415	1	0.14275
AFLA_014530	-3.23472	0.000930617	-2.74005	0.0047324	-0.576701	0.536234	0.420978	0.707953	1.40234	0.0533006	-0.194869	0.873759	-0.494671	1	-0.99768	0.325118	1.59721	0.186966	0.0917516
AFLA_014540	0.642725	0.023069	0.646376	0.0232069	1.50318	1.16468e-07	1.1571	2.75766e-05	0.916494	5.39138e-05	0.949376	0.000175671	-0.00365084	1	0.346075	0.229393	-0.0328827	1	0.0604236
AFLA_014550	0.061691	0.793797	-0.0592888	0.814799	-0.249773	0.0639821	-0.484886	0.00091136	-0.554163	1.44684e-05	-0.450305	0.00100837	0.12098	1	0.235113	0.124191	-0.103858	0.727659	0.219108
AFLA_014560	0.327088	0.92239	0.951913	0.592617	-0.487618	0.745462	-0.272665	0.91223	-0.757094	0.504436	-0.872385	0.503785	-0.624825	1	-0.214953	0.968588	0.11529	1	0.520068
AFLA_014570	-1.34453	0.000155334	-0.637668	0.0710561	0.804111	0.00701645	2.18465	1.04685e-08	-0.35319	0.179462	-0.610879	0.0386899	-0.706859	0.435314	-1.38053	5.83646e-05	0.257689	0.675643	0.700846
AFLA_014580	-0.276343	0.00663375	-0.114031	0.312919	-0.155962	0.0768334	-0.0552065	0.622273	0.0845515	0.282995	0.0762705	0.4127	-0.162312	0.690624	-0.100755	0.3514	0.00828099	1	0.000529589
AFLA_014590	-0.256943	0.233713	-0.303708	0.151456	-0.540796	0.00210835	-0.45868	0.0134235	0.0909313	0.588464	-0.025503	0.942179	0.0467644	1	-0.0821158	0.771109	0.116434	0.783509	0.21659
AFLA_014600	0.256752	0.211271	0.244195	0.243919	0.63979	0.00021742	0.532841	0.00295941	-0.375773	0.0101979	-0.325272	0.0499413	0.0125575	1	0.106949	0.656422	-0.0505011	0.962976	1
AFLA_014610	-0.183641	0.523908	-0.261549	0.330577	0.391169	0.0600323	0.801444	0.000424626	1.14911	8.25326e-08	1.21569	2.94425e-07	0.0779083	1	-0.410275	0.0777557	-0.0665862	0.954118	0.389141
AFLA_014620	-0.334778	0.218054	-0.411167	0.121627	-0.892914	0.000107223	-0.104006	0.730712	0.983674	3.95287e-06	0.471094	0.0312549	0.0763888	1	-0.788908	0.00129873	0.51258	0.0932887	0.584551
AFLA_014630	-0.261731	0.173381	-0.210755	0.297643	0.121645	0.483825	0.0600313	0.799078	0.405257	0.00372224	0.41175	0.00904603	-0.0509758	1	0.0616142	0.826224	-0.00649267	1	0.395183
AFLA_014640	-0.411986	0.0411803	-0.336302	0.104848	-0.817922	1.18624e-05	-0.886829	8.18619e-06	-0.682918	2.65518e-05	-0.748059	4.27797e-05	-0.0756839	1	0.0689064	0.820681	0.0651404	0.929165	0.907417
AFLA_014650	-0.414865	0.0119357	-0.277605	0.1044	-0.519709	0.00039504	0.0655846	0.739011	-0.28567	0.0216295	-0.273184	0.05395	-0.13726	1	-0.585294	0.000276211	-0.012486	1	0.398681
AFLA_014660	-0.350605	0.0258088	-0.0696766	0.768344	-0.06302	0.700233	-0.36506	0.0115501	-0.199857	0.0915345	-0.259953	0.0536469	-0.280928	0.576781	0.30204	0.0445832	0.0600956	0.899616	0.698312
AFLA_014670	-1.37588	0.0628816	-1.08726	0.157464	-0.284235	0.711467	-0.272232	0.760813	-0.234546	0.719089	0.417002	0.547864	-0.288617	1	-0.0120034	1	-0.651548	0.575959	0.000491002
AFLA_014680	-0.551484	0.00219749	-0.209097	0.288624	-0.100133	0.568887	-0.588404	0.000490583	-1.20221	4.36286e-11	-1.24746	3.36737e-10	-0.342387	0.506397	0.488272	0.00430876	0.045248	0.968835	0.000287558
AFLA_014690	-0.519948	0.00100784	-0.419724	0.00745147	0.304707	0.0233438	-0.218386	0.13724	-0.423879	0.000500929	-0.629026	1.39318e-05	-0.100224	1	0.523092	0.000537848	0.205147	0.333253	0.304962
AFLA_014700	-0.476975	0.0024111	-0.635401	9.49757e-05	0.0744694	0.637669	-0.000460715	1	-0.0786858	0.540514	0.132801	0.345756	0.158426	0.95697	0.0749301	0.714479	-0.211487	0.313506	0.801274
AFLA_014710	-0.416795	6.56649e-06	-0.31372	0.000389876	0.320553	4.76195e-05	0.341773	4.44837e-05	0.119312	0.0664319	0.0956597	0.205684	-0.103075	0.895032	-0.0212201	0.898479	0.0236524	0.955199	0.582388
AFLA_014720	-0.442804	0.00163614	-0.207327	0.158201	-0.0655642	0.642326	0.0893569	0.54362	-0.313359	0.00325748	-0.11803	0.347369	-0.235476	0.638569	-0.154921	0.283612	-0.195329	0.291581	0.93119
AFLA_014730	-0.253977	0.586633	-0.232792	0.639345	0.738834	0.0223948	0.770765	0.0260174	-1.53394	1.50053e-06	-1.457	2.48711e-05	-0.0211856	1	-0.0319312	1	-0.076945	0.99024	0.248525
AFLA_014740	0.387892	0.00208	0.366794	0.00363046	0.923176	9.57513e-11	0.781877	1.43134e-08	0.64935	1.49911e-08	1.01092	1.01693e-11	0.0210986	1	0.141299	0.274366	-0.361573	0.0105634	1
AFLA_014750	0.412533	0.144139	0.296282	0.327568	0.0314445	0.964021	0.0435038	0.94134	-0.07436	0.768234	0.168434	0.508603	0.116251	1	-0.0120593	1	-0.242794	0.574256	0.155987
AFLA_014760	0.130728	0.557783	0.0511825	0.895059	-0.0995138	0.5803	0.272921	0.110438	0.7105	3.39127e-06	0.893962	5.23627e-07	0.0795451	1	-0.372435	0.0327705	-0.183463	0.504138	0.0291639
AFLA_014770	-0.137455	0.987714	0.505003	0.686676	-0.509506	0.567662	0.571832	0.552448	3.23643	1.38262e-05	3.07634	0.000159682	-0.642458	1	-1.08134	0.244834	0.160091	1	0.000809778
AFLA_014780	-0.566874	0.0294109	-0.562572	0.0320158	-0.463755	0.0379379	0.222457	0.393132	0.136914	0.519105	0.371409	0.0972543	-0.00430259	1	-0.686212	0.00555271	-0.234495	0.568716	0.00354476
AFLA_014790	-0.532794	0.00566528	-0.441454	0.0228099	-0.404518	0.0147507	0.0862357	0.698146	-0.126679	0.407313	0.101422	0.582977	-0.0913405	1	-0.490754	0.00738229	-0.228101	0.400117	0.00739854
AFLA_014800	-0.136902	0.361457	0.0322687	0.927537	0.592362	3.41153e-06	0.403718	0.00128265	0.147565	0.147597	0.198272	0.0865465	-0.169171	0.872022	0.188644	0.155953	-0.050707	0.901606	0.93871
AFLA_014810	-0.0449258	0.756431	-6.91374e-05	1	0.584853	2.14632e-08	0.455185	6.23399e-06	0.251459	0.00125707	0.188416	0.029717	-0.0448567	1	0.129668	0.204524	0.0630432	0.756257	0.95205
AFLA_014820	-1.08442	1.99287e-07	-0.798444	4.00207e-05	-1.04192	3.60207e-08	-0.905282	1.52894e-06	0.481149	0.00078389	0.343367	0.0301648	-0.285972	0.713496	-0.136637	0.517214	0.137782	0.67731	6.39084e-05
AFLA_014830	1.49828	0.0349475	2.57819	0.000375552	-1.76404	0.00404248	-0.812503	0.231489	2.68837	4.93003e-06	3.02668	5.37922e-06	-1.07991	0.724535	-0.951541	0.178663	-0.338303	0.843747	0.0511046
AFLA_014840	0.101653	0.729031	0.019071	1	0.349711	0.0553036	0.185257	0.381101	-0.0961298	0.585278	-0.148296	0.44666	0.0825817	1	0.164454	0.490548	0.0521665	0.972657	0.544232
AFLA_014850	0.0755157	0.652222	0.22205	0.0946391	0.063099	0.625964	-0.663921	6.1214e-07	0.898847	1.67133e-11	1.2019	2.61661e-13	-0.146534	0.91812	0.72702	1.86291e-07	-0.303055	0.0429919	0.000847201
AFLA_014860	1.99767	0.00019798	1.48716	0.00462673	1.08591	0.0157062	1.23525	0.0101491	-0.819052	0.0370796	-1.36665	0.00260083	0.510519	0.973512	-0.149341	0.86537	0.547598	0.475894	0.516344
AFLA_014870	1.42673	0.0851908	1.59038	0.0547385	0.868623	0.230043	0.620253	0.456456	1.35721	0.0264293	-0.341519	0.674425	-0.163654	1	0.248369	0.850085	1.69873	0.0797669	0.559291
AFLA_014880	0.47916	0.675598	0.427045	0.73331	2.67997	0.000483514	2.59384	0.00134556	1.53266	0.0189417	4.2929	4.20651e-07	0.0521152	1	0.0861326	1	-2.76024	0.0045631	0.0898933
AFLA_014890	-5.20096	4.18238e-15	-5.05002	7.66234e-15	-6.98678	3.4001e-20	-6.34006	2.58153e-18	-3.23582	1.69158e-12	-2.07571	4.97919e-07	-0.15094	1	-0.646725	0.117821	-1.1601	0.0158549	0.0314036
AFLA_014900	0.165653	0.828214	0.492695	0.353392	0.637216	0.121109	0.822974	0.0594119	-0.537738	0.132133	-1.26516	0.0020696	-0.327042	1	-0.185758	0.780787	0.727417	0.227169	0.543484
AFLA_014910	0.093933	0.652493	0.165338	0.361547	0.459336	0.0011011	0.23868	0.111688	0.258834	0.031978	0.345458	0.0121472	-0.071405	1	0.220657	0.16657	-0.0866232	0.807808	0.191415
AFLA_014920	1.80702	5.2399e-12	0.771257	0.000117941	-0.179243	0.304267	0.00601469	1	0.0129853	0.986257	-0.0683317	0.734776	1.03576	0.000379165	-0.185258	0.36844	0.081317	0.879162	0.152213
AFLA_014930	0.000687836	1	0.00985392	1	0.796004	2.56119e-08	0.495556	0.000180408	0.181569	0.0829571	-0.115591	0.356078	-0.00916608	1	0.300448	0.0230918	0.29716	0.0716203	0.0918347
AFLA_014940	-0.0133142	1	0.105796	0.917878	0.429952	0.252184	0.724378	0.0624893	0.974821	0.00242109	1.26917	0.000608528	-0.11911	1	-0.294426	0.544792	-0.294345	0.707991	9.11418e-07
AFLA_014950	-1.01067	0.00388462	-1.11393	0.0016159	-1.51558	4.47203e-06	-0.764128	0.0174971	-0.818186	0.00224889	-1.02877	0.000810515	0.103263	1	-0.751448	0.0240714	0.210583	0.767716	0.00358384
AFLA_014960	-0.3128	0.0507186	-0.264578	0.107207	-0.334226	0.0144985	-0.220726	0.139309	-0.753913	8.80023e-08	-0.732923	1.47076e-06	-0.048222	1	-0.1135	0.534297	-0.0209903	1	0.362806
AFLA_014970	-0.463621	0.0146572	-0.362146	0.062074	0.136501	0.443437	0.378328	0.0307079	0.02031	0.945495	-0.152804	0.374734	-0.101475	1	-0.241827	0.208796	0.173114	0.564196	3.46724e-12
AFLA_014980	0.466522	0.00925879	0.594593	0.00108871	0.539149	0.000665308	-0.418451	0.0113616	2.17748	6.46467e-18	2.88463	8.44234e-20	-0.128071	1	0.9576	5.34317e-07	-0.707145	0.000436265	0.000143029
AFLA_014990	-0.395974	0.024895	-0.300001	0.0993111	-0.8615	5.69938e-07	-0.736887	2.01086e-05	-0.185316	0.16734	-0.341151	0.0239307	-0.0959733	1	-0.124613	0.540643	0.155835	0.58051	0.797237
AFLA_015000	0.312868	0.856159	-1.17213	0.275841	-0.730581	0.424659	-0.290951	0.826616	-0.172285	0.873047	0.131388	0.936068	1.485	0.734778	-0.439631	0.739898	-0.303672	0.937382	0.941648
AFLA_015010	-0.842943	0.441712	-0.399594	0.785474	-2.70445	0.00116918	-2.69733	0.00222336	-0.991444	0.170522	-0.693389	0.426215	-0.443348	1	-0.00711441	1	-0.298056	0.934928	0.658141
AFLA_015020	0.461934	0.759205	0.461934	0.770866	-0.736054	0.456038	0.0112277	1	1.65	0.0365957	2.24639	0.0126348	3.55271e-15	1	-0.747282	0.53601	-0.596389	0.787597	0.208266
AFLA_015030	-0.584162	6.78923e-07	-0.634445	1.43521e-07	-0.718792	6.94842e-10	-0.604455	9.13367e-08	-0.663676	2.32335e-10	-0.689585	1.62339e-09	0.0502831	1	-0.114337	0.301863	0.0259094	0.973171	0.252276
AFLA_015040	-0.390371	0.00377151	-0.183728	0.20115	0.299081	0.0100079	0.0491263	0.767339	-0.149794	0.142057	-0.0417266	0.774489	-0.206643	0.721991	0.249954	0.052642	-0.108067	0.638151	1
AFLA_015050	1.22359	8.05951e-05	1.65129	6.40482e-07	1.39746	1.2682e-06	1.44667	1.86414e-06	-0.712479	0.00189979	-0.925284	0.00046973	-0.427707	0.781699	-0.0492099	0.960825	0.212806	0.700018	0.957117
AFLA_015060	0.912368	0.0245902	0.96954	0.0173785	-0.0304037	1	0.329607	0.422053	-2.80707	2.02959e-11	-2.81832	3.46918e-10	-0.057172	1	-0.360011	0.415011	0.0112421	1	1.29298e-05
AFLA_015070	0.994152	0.00229616	1.27956	0.000140006	2.18867	7.51721e-10	1.43257	8.50754e-06	2.39626	4.11592e-12	1.66735	2.08531e-07	-0.285405	0.997332	0.756103	0.0140902	0.728904	0.0554576	0.260354
AFLA_015080	0.50386	0.795215	-0.431108	0.849566	-0.320487	0.838988	-0.16426	0.967504	-3.0219	0.00209548	-1.58883	0.154083	0.934968	1	-0.156227	0.990269	-1.43308	0.435538	0.844665
AFLA_015090	-0.982307	1.39318e-07	-0.641055	0.000161854	-0.858773	1.63145e-07	-0.799574	1.71126e-06	-0.449423	0.000461746	-0.398751	0.00499904	-0.341252	0.422754	-0.0591996	0.807173	-0.0506722	0.937765	0.0662486
AFLA_015100	-0.447187	0.353387	-1.20001	0.00578196	-1.30805	0.000617825	-0.642694	0.112387	-1.15875	0.000578719	-0.890658	0.0164391	0.752826	0.607299	-0.665357	0.115593	-0.268089	0.759274	0.532081
AFLA_015110	0.220964	0.532925	-0.553455	0.0661253	-0.983793	0.000192602	-0.675435	0.0127456	0.770302	0.000747518	1.07465	5.8925e-05	0.774418	0.190847	-0.308357	0.318009	-0.304345	0.484806	0.406946
AFLA_015120	0.394823	0.323491	0.271421	0.548715	1.12781	0.000457558	1.13042	0.000887571	2.20498	4.52824e-10	2.09109	2.14736e-08	0.123402	1	-0.00260178	1	0.113889	0.935003	0.0262111
AFLA_015130	0.090159	0.878507	0.223073	0.567265	-0.598992	0.0247168	-0.347841	0.244572	1.6209	1.25386e-08	1.33904	4.63371e-06	-0.132914	1	-0.251151	0.465787	0.281858	0.56529	0.820342
AFLA_015140	-0.637746	0.05501	-0.173811	0.707772	-0.235996	0.443821	-0.414562	0.184475	0.911066	0.000395046	0.54453	0.053617	-0.463936	0.79184	0.178566	0.664048	0.366536	0.437572	0.000102179
AFLA_015150	-0.479588	0.0168453	-0.412918	0.0427989	-0.0591101	0.797765	0.140692	0.500246	-0.173186	0.263031	-0.550348	0.00167903	-0.0666706	1	-0.199802	0.347504	0.377162	0.121259	0.956261
AFLA_015160	-0.517096	0.128363	-0.355806	0.332204	0.149326	0.655164	0.591021	0.0517746	0.370695	0.136734	-0.0649954	0.877687	-0.16129	1	-0.441695	0.179291	0.43569	0.328112	0.0633913
AFLA_015170	-0.222485	0.00635024	-0.158863	0.056067	-0.432719	1.21609e-07	-0.41399	8.08366e-07	-0.626655	1.49332e-12	-0.637022	2.20504e-11	-0.0636221	1	-0.0187295	0.910716	0.0103665	1	0.139134
AFLA_015180	-1.35001	0.001019	-1.42416	0.000578183	1.37033	0.000168574	1.25394	0.000962768	-0.210575	0.526449	0.650971	0.0618488	0.074149	1	0.116389	0.864863	-0.861546	0.0742191	0.464404
AFLA_015190	-0.054736	0.943254	0.0199067	1	-0.146676	0.568448	0.427136	0.0796552	0.220815	0.275328	0.524903	0.019552	-0.0746428	1	-0.573812	0.0214782	-0.304088	0.411907	1
AFLA_015200	-0.22655	0.286921	-0.112897	0.669621	0.0255389	0.949796	0.00893934	1	-1.21673	2.52249e-10	-0.7963	1.15847e-05	-0.113653	1	0.0165996	1	-0.420434	0.0696751	0.0237697
AFLA_015210	0.0245172	0.991691	0.088801	0.707772	0.490371	0.000900463	0.788545	3.13713e-06	-0.562558	3.39686e-05	-0.32141	0.0255325	-0.0642838	1	-0.298174	0.0649955	-0.241148	0.273512	0.742122
AFLA_015220	0.0354308	0.853407	0.0310134	0.894	0.359838	0.000251716	0.287304	0.00472802	0.265061	0.00172557	0.456066	9.05171e-06	0.00441738	1	0.0725345	0.575232	-0.191006	0.162674	0.550295
AFLA_015230	-0.53329	4.44982e-05	-0.363535	0.00383373	-0.057923	0.64759	-0.112179	0.367436	-0.250346	0.00813799	-0.188492	0.0794634	-0.169755	0.819059	0.0542564	0.749264	-0.061854	0.831814	0.385727
AFLA_015240	-0.169546	0.24959	0.0250643	0.967967	0.00805588	1	-0.0725567	0.632296	0.102582	0.337238	-0.0379949	0.804796	-0.19461	0.785894	0.0806126	0.627971	0.140577	0.48769	0.135306
AFLA_015250	1.77636e-15	1	-1.77636e-15	1	3.55271e-15	1	8.88178e-16	1	0	1	-1.77636e-15	1	3.55271e-15	1	2.66454e-15	1	1.77636e-15	1	0.410813
AFLA_015260	0.373366	0.643757	-0.0273127	1	1.36314	0.0114242	1.15199	0.0458335	-0.255636	0.629536	0.102891	0.908064	0.400678	1	0.211156	0.824627	-0.358528	0.785312	0.421746
AFLA_015270	-0.574348	0.000259378	-0.434869	0.00481863	-0.651764	6.24581e-06	-0.525166	0.000299689	0.234211	0.0423577	0.0891159	0.539226	-0.139479	0.995729	-0.126599	0.455414	0.145095	0.544351	0.476519
AFLA_015280	-0.611441	0.636117	-0.83246	0.492542	-0.859782	0.349374	0.132395	0.964584	0.735554	0.350937	2.20774	0.0106703	0.221019	1	-0.992177	0.352829	-1.47219	0.260936	0.335818
AFLA_015290	-0.00452424	1	-0.0157013	1	0.492544	0.0216099	0.513247	0.0252786	-0.427349	0.0227152	0.0454125	0.892217	0.0111771	1	-0.020703	1	-0.472761	0.116541	0.139991
AFLA_015300	3.44945	1.61117e-13	4.16457	8.78737e-16	0.67073	0.0153721	0.984463	0.0010464	0.994498	0.000100638	0.687023	0.0127785	-0.715121	0.355116	-0.313732	0.358804	0.307475	0.536397	0.000393521
AFLA_015310	0.4466	0.000728914	0.577328	2.72974e-05	0.450302	0.000124091	0.697187	2.98848e-07	0.348018	0.00059218	0.188246	0.0936297	-0.130728	0.958898	-0.246885	0.0477005	0.159772	0.379102	0.683665
AFLA_015320	-0.093767	0.691439	-0.106946	0.64784	0.129443	0.431974	-0.10328	0.586928	-1.17724	4.97854e-11	-0.943554	9.49473e-08	0.0131788	1	0.232723	0.188432	-0.233686	0.328114	0.528513
AFLA_015330	-0.0786291	0.749703	-0.105049	0.648112	0.232755	0.123995	0.0466857	0.850237	-0.38916	0.00328476	-0.401222	0.00727834	0.02642	1	0.186069	0.304223	0.0120621	1	1.05484e-10
AFLA_015340	0.753097	0.0628451	1.31392	0.00117459	-3.01313	5.65187e-11	-2.17755	2.15945e-07	-1.95009	5.25693e-08	-2.19172	5.85905e-08	-0.560822	0.794614	-0.835578	0.0284652	0.241634	0.766484	7.48831e-05
AFLA_015350	-0.305689	0.165193	-0.0522044	0.920828	0.717733	0.000148616	0.140852	0.522364	-0.10946	0.525367	0.0183752	0.977364	-0.253485	0.890698	0.576881	0.00410456	-0.127835	0.765069	0.000344568
AFLA_015360	-0.785069	6.50338e-05	-0.675474	0.000466915	-0.992201	1.47255e-07	-1.09256	6.57262e-08	-0.938686	3.56835e-08	-0.689287	5.86063e-05	-0.109596	1	0.10036	0.672714	-0.249398	0.330329	0.261915
AFLA_015370	-0.129625	0.490181	-0.054314	0.845745	-0.277987	0.0426791	-0.553978	0.000248383	-0.40377	0.00103389	-0.546817	0.000133032	-0.0753111	1	0.275991	0.0721384	0.143047	0.572238	0.176625
AFLA_015380	0.853992	1.24599e-06	0.775735	6.85951e-06	0.278604	0.0438048	0.606962	8.42156e-05	0.536005	3.55687e-05	0.392555	0.00468376	0.0782565	1	-0.328358	0.0321128	0.14345	0.574532	0.0261595
AFLA_015390	-0.00887358	1	0.408327	0.154634	-0.139168	0.609071	-0.161357	0.58185	0.0407302	0.90145	0.0441856	0.910618	-0.4172	0.724535	0.0221887	1	-0.00345543	1	0.00219037
AFLA_015400	0.0153268	1	-0.161589	0.580013	-0.0852854	0.727698	0.348679	0.106033	0.958097	1.09655e-06	0.930217	1.3686e-05	0.176916	1	-0.433964	0.0495387	0.0278791	1	0.854074
AFLA_015410	0.201816	0.375369	0.10193	0.726084	0.196323	0.28159	0.0507009	0.866816	-0.0331835	0.885931	0.0248661	0.945424	0.0998857	1	0.145622	0.533084	-0.0580496	0.949382	0.117389
AFLA_015420	-0.575559	0.023691	-0.337367	0.216559	1.01874	1.55772e-05	0.943392	0.000108183	-1.54266	4.56849e-10	-1.67485	1.16092e-09	-0.238191	0.987666	0.0753508	0.857355	0.132183	0.816966	0.275928
AFLA_015430	-0.196032	0.0264815	-0.25518	0.00401957	-0.0871638	0.270624	0.401566	5.14244e-06	-0.3573	1.67817e-06	-0.184416	0.0147549	0.0591482	1	-0.48873	2.44844e-07	-0.172883	0.101418	0.00296439
AFLA_015440	0.291038	0.0576061	0.319967	0.0370028	0.537457	8.89878e-05	0.582388	6.75972e-05	0.0158719	0.947439	0.50826	0.000178682	-0.0289287	1	-0.0449305	0.857312	-0.492388	0.00381695	0.0332481
AFLA_015450	-0.109269	0.477184	-0.0715272	0.694623	0.336623	0.00313926	-0.0184381	0.957312	-0.375755	0.000264765	-0.115985	0.322707	-0.0377421	1	0.355061	0.0045077	-0.25977	0.0980285	0.315552
AFLA_015460	-0.207089	0.0887593	-0.138575	0.29049	-0.0967881	0.3777	-0.492696	2.3474e-05	0.102759	0.262961	0.168591	0.100943	-0.0685146	1	0.395907	0.000583555	-0.0658315	0.798875	0.416628
AFLA_015470	0.605977	7.85996e-05	0.649318	3.10548e-05	0.551382	4.45517e-05	0.529722	0.000169832	0.525738	1.39406e-05	0.624234	6.59564e-06	-0.0433406	1	0.02166	0.973699	-0.0984958	0.726797	0.92216
AFLA_015480	-0.869462	0.591442	-0.511957	0.804388	0.441538	0.755932	1.81465	0.138579	-2.39815	0.0145478	-1.80716	0.108147	-0.357504	1	-1.37311	0.313982	-0.590986	0.859557	0.116034
AFLA_015490	-0.620442	0.00186814	-0.739018	0.000284282	-0.237203	0.174251	-0.617003	0.000884509	-0.0303695	0.897299	-0.280301	0.101213	0.118576	1	0.3798	0.0453619	0.249931	0.361387	0.0710789
AFLA_015500	0.502097	0.0830367	0.396144	0.189905	0.645674	0.00848366	0.290584	0.294898	-0.643173	0.00302587	-0.321533	0.195432	0.105953	1	0.35509	0.218516	-0.321641	0.427153	0.708195
AFLA_015510	-0.202633	0.396386	-0.159891	0.541612	0.249616	0.179382	-0.056826	0.850095	-0.515497	0.00148975	-0.433833	0.016568	-0.0427428	1	0.306442	0.140175	-0.0816643	0.896645	1
AFLA_015520	0.204011	0.306344	-0.182493	0.378941	-0.236131	0.137941	-0.181515	0.309628	0.0598244	0.71161	-0.0315361	0.900354	0.386504	0.403605	-0.0546159	0.854186	0.0913605	0.827788	0.164176
AFLA_015530	0.858201	0.0181616	1.18168	0.00131453	-1.59313	3.74363e-06	-0.464552	0.178074	1.30156	1.26112e-05	1.72697	8.85991e-07	-0.323476	0.997216	-1.12858	0.00122421	-0.425408	0.405732	0.175376
AFLA_015540	-1.68363	0.132859	-0.481556	0.767071	0.0798547	1	-0.396173	0.765901	-2.18981	0.00749987	-1.5085	0.106157	-1.20208	0.925903	0.476028	0.744785	-0.681306	0.751729	0.16692
AFLA_015550	-0.477541	0.138843	0.45933	0.160494	0.799601	0.00307555	-0.0550104	0.92762	1.4839	7.99943e-08	0.75446	0.00495704	-0.936872	0.100706	0.854611	0.00397131	0.729435	0.043495	0.431267
AFLA_015560	-1.36454	0.328293	0.152493	1	-0.109203	0.990504	-0.825994	0.53516	0.940576	0.342147	2.02759	0.0622452	-1.51704	0.893233	0.71679	0.645716	-1.08701	0.597455	1
AFLA_015570	-0.266172	0.866713	0.197292	0.93897	1.02554	0.182477	-0.0136773	1	2.08339	0.00186034	0.233536	0.813954	-0.463464	1	1.03922	0.243813	1.84985	0.0744799	0.994281
AFLA_015580	-0.46953	0.0272482	-0.222924	0.349833	1.42071	8.85453e-10	1.00685	2.62112e-06	1.18614	2.94888e-09	2.08401	6.88678e-14	-0.246607	0.909722	0.413861	0.0415426	-0.897868	0.000171073	0.105858
AFLA_015590	0.535349	0.02067	0.706472	0.00244405	0.634179	0.00170093	0.198444	0.392202	1.51718	7.37892e-11	1.80656	2.19319e-11	-0.171124	1	0.435735	0.0491215	-0.289382	0.365956	8.98818e-10
AFLA_015600	-0.418822	0.0139783	-0.486628	0.00456047	-0.264111	0.0732973	-0.428828	0.00640303	-0.638059	6.37516e-06	-1.02291	9.19684e-09	0.067806	1	0.164718	0.365177	0.384855	0.0540159	2.87324e-11
AFLA_015610	-2.24757	6.58466e-11	-2.17888	1.40713e-10	-0.231661	0.339218	-0.77799	0.00169352	0.0675791	0.789212	0.0299816	0.953966	-0.0686851	1	0.546329	0.0315373	0.0375975	1	2.39959e-08
AFLA_015620	-1.63043	0.0839092	-0.733096	0.517412	0.258592	0.811764	-0.598263	0.538985	-0.00373375	1	0.629216	0.461844	-0.897334	0.976844	0.856855	0.390179	-0.63295	0.71772	0.176625
AFLA_015630	-1.4577	1.10683e-08	-1.68911	4.12305e-10	-2.95133	8.15977e-18	-2.32332	2.63895e-14	-0.822403	4.78743e-06	-0.528202	0.00468123	0.23141	0.941629	-0.628009	0.00237574	-0.2942	0.308966	0.176625
AFLA_015640	-2.25627	2.05315e-08	-2.49846	2.2387e-09	-2.93656	2.61924e-12	-2.3766	1.56116e-09	-0.479569	0.0641065	-0.34572	0.255391	0.242189	1	-0.559958	0.093737	-0.133849	0.896061	0.0286098
AFLA_015650	0.647152	0.00566408	0.456008	0.0557282	1.16684	3.86875e-07	0.825933	0.000203778	0.841916	1.16134e-05	0.872362	4.2982e-05	0.191144	1	0.340906	0.138254	-0.0304464	1	0.0719291
AFLA_015660	0.182703	0.953683	1.04261	0.316258	-0.0313006	1	-0.994391	0.27558	2.72605	0.000222168	3.3313	8.41575e-05	-0.859905	0.993916	0.96309	0.329096	-0.60525	0.740981	0.198174
AFLA_015670	0.505359	7.85996e-05	0.673608	7.77444e-07	0.484865	2.05579e-05	0.317972	0.00518315	-1.02145	2.10038e-13	-1.03473	3.78875e-12	-0.16825	0.815031	0.166893	0.175253	0.0132783	1	0.0502499
AFLA_015680	-0.233751	0.521271	-0.0457646	0.991179	-1.09785	7.33933e-05	0.207308	0.515314	0.935052	0.000114803	0.551159	0.0349507	-0.187986	1	-1.30516	2.39279e-05	0.383894	0.362628	1
AFLA_015690	0.529839	0.000118564	0.678336	2.79378e-06	1.58053	4.33331e-16	1.15938	6.41125e-12	0.229375	0.0221647	0.467222	0.000100361	-0.148497	0.925458	0.421147	0.00101291	-0.237848	0.148331	0.250661
AFLA_015700	0.904338	0.000363921	0.901248	0.00039767	1.61784	1.64178e-09	1.54109	1.62054e-08	0.0723394	0.750325	0.467673	0.0279958	0.00309015	1	0.0767535	0.847595	-0.395334	0.208455	0.362635
AFLA_015710	-1.34982	9.56949e-08	-1.39857	4.78408e-08	-3.94208	3.47041e-21	-3.0056	4.40253e-17	-2.43064	1.10198e-16	-2.5223	1.25177e-15	0.0487552	1	-0.936474	2.81383e-05	0.0916556	0.88318	0.512175
AFLA_015720	-0.286014	0.285675	-0.261159	0.34384	0.513675	0.0153661	0.0637282	0.859102	-0.757555	0.000107897	-0.511872	0.0153164	-0.0248549	1	0.449947	0.0564964	-0.245682	0.508475	0.509793
AFLA_015730	0.0812135	0.673137	-0.124891	0.473134	0.736931	3.12934e-07	0.632926	1.13376e-05	0.306753	0.00566009	0.176857	0.164524	0.206105	0.79184	0.104005	0.53601	0.129896	0.576749	9.27593e-08
AFLA_015740	0.032983	1	0.361279	0.245555	0.235342	0.372783	0.377832	0.164096	-0.206258	0.360361	-0.61202	0.0130404	-0.328296	0.916753	-0.14249	0.701591	0.405762	0.284089	0.524905
AFLA_015750	1.77636e-15	1	-1.77636e-15	1	3.55271e-15	1	8.88178e-16	1	0	1	-1.77636e-15	1	3.55271e-15	1	2.66454e-15	1	1.77636e-15	1	1
AFLA_015760	1.77636e-15	1	-1.77636e-15	1	3.55271e-15	1	8.88178e-16	1	0	1	-1.77636e-15	1	3.55271e-15	1	2.66454e-15	1	1.77636e-15	1	1
AFLA_015770	1.77636e-15	1	-0.711813	0.00739921	3.55271e-15	1	8.88178e-16	1	0	1	-1.77636e-15	1	0.711813	0.174163	2.66454e-15	1	1.77636e-15	1	1
AFLA_015780	-1.30164	0.0107145	-0.916653	0.0805585	1.09041	0.0132803	0.541034	0.27602	2.18027	6.66613e-07	2.35775	1.48582e-06	-0.384988	1	0.549381	0.302037	-0.177483	0.916738	0.236282
AFLA_015790	-1.18691	0.000203764	-0.939588	0.00270252	-0.422759	0.118657	0.39424	0.181882	2.19377	1.25592e-11	2.19736	2.37481e-10	-0.247325	1	-0.816999	0.00583686	-0.0035948	1	3.58046e-05
AFLA_015800	-1.85184	5.5381e-13	-1.88464	3.378e-13	-2.081	1.06752e-15	-1.35642	2.50758e-10	-1.97635	1.30483e-16	-1.56998	1.77459e-12	0.0327969	1	-0.724581	5.99819e-05	-0.40637	0.0562843	0.328258
AFLA_015810	-1.53114	1.21373e-06	-0.760432	0.00841694	-2.02121	2.90879e-10	-1.54931	2.6267e-07	-1.2101	8.58405e-07	-1.24955	4.15065e-06	-0.770706	0.176063	-0.471904	0.0906989	0.0394504	1	0.317173
AFLA_015820	-1.34131	5.2449e-05	-1.13593	0.000469521	-2.289	1.6438e-10	-1.97458	1.57406e-08	-1.85308	1.14286e-09	-1.45109	1.80631e-06	-0.205382	1	-0.314413	0.351046	-0.401991	0.359628	1
AFLA_015830	-1.96312	0.00025077	-1.77279	0.000844212	-2.99124	2.66648e-08	-3.40968	5.63986e-09	-1.57279	0.000145909	-1.54261	0.000792248	-0.190327	1	0.418434	0.472863	-0.0301853	1	0.829662
AFLA_015840	1.77636e-15	1	-1.77636e-15	1	3.55271e-15	1	8.88178e-16	1	-0.519351	0.265647	-2.56737	6.19754e-06	3.55271e-15	1	2.66454e-15	1	2.04802	0.00249695	0.00484937
AFLA_015850	-3.07126	0.00134616	-2.2661	0.0176022	-0.0616865	1	0.000443366	1	-0.676047	0.365121	-0.927203	0.270786	-0.805161	1	-0.0621299	1	0.251156	0.961464	0.806523
AFLA_015860	0.731646	0.166536	1.73774	0.00072141	0.618658	0.163721	1.31754	0.00473089	-0.0473386	0.958228	0.1823	0.728261	-1.0061	0.465705	-0.698881	0.163577	-0.229638	0.858953	0.409877
AFLA_015870	-2.47903	0.00456979	-1.24608	0.17839	0.167627	0.893175	1.65097	0.0404646	-0.200475	0.815085	-0.0696627	0.984171	-1.23295	0.79184	-1.48334	0.0784597	-0.130812	1	1
AFLA_015880	0.292705	0.535364	1.29589	0.00111039	0.279062	0.448314	1.2935	0.000465524	-0.999868	0.000970524	-0.904024	0.00745034	-1.00318	0.216317	-1.01444	0.00656544	-0.0958441	0.973171	0.702587
AFLA_015890	0.55714	0.0335493	0.641511	0.0144312	0.333699	0.144497	0.416389	0.0867511	1.45004	3.41595e-09	1.6148	4.74589e-09	-0.0843715	1	-0.0826905	0.841103	-0.164763	0.751182	0.879741
AFLA_015900	0.0654704	1	0.916344	0.578511	2.33354	0.0374621	2.60668	0.0299351	5.498	8.2628e-07	3.86241	0.000753061	-0.850874	1	-0.273144	0.925312	1.63559	0.364127	0.0852965
AFLA_015910	-0.812768	0.585623	0.4619	0.810743	0.908321	0.416278	1.91674	0.0865669	5.51242	1.74296e-07	5.50053	1.71946e-06	-1.27467	0.941635	-1.00842	0.445985	0.0118967	1	0.21768
AFLA_015920	-0.256827	0.520633	-0.0110842	1	0.0585056	0.909492	0.32652	0.322018	2.51386	2.69047e-12	2.25284	7.25261e-10	-0.245743	1	-0.268015	0.472588	0.261024	0.65438	1.02072e-05
AFLA_015930	1.37861	0.000210852	-0.00127477	1	0.899707	0.00416707	0.554989	0.10068	3.47897	4.20942e-15	3.13938	1.69607e-12	1.37988	0.0186413	0.344718	0.373486	0.339589	0.548694	0.398631
AFLA_015940	1.77636e-15	1	-1.77636e-15	1	3.55271e-15	1	8.88178e-16	1	0	1	-1.77636e-15	1	3.55271e-15	1	2.66454e-15	1	1.77636e-15	1	1
AFLA_015950	0.505003	0.703405	-1.07746	0.323259	2.60131	0.00232958	2.77665	0.00227566	7.09564	6.71742e-12	7.09564	1.35827e-10	1.58246	0.676997	-0.175333	0.949301	8.88178e-16	1	0.409325
AFLA_015960	-2.2687	0.0604529	-0.734403	0.641989	1.46388	0.163339	1.00267	0.40432	3.08615	0.000846516	4.27323	7.67843e-05	-1.53429	0.86014	0.461217	0.785715	-1.18708	0.510961	0.0607414
AFLA_015970	-1.52135	5.74546e-08	-1.74088	3.25112e-09	-1.5413	3.11749e-09	-1.44739	3.98324e-08	-0.183992	0.333564	-0.268314	0.209073	0.219523	0.997216	-0.0939108	0.786246	0.0843213	0.917621	0.486992
AFLA_015980	-1.96885	7.7633e-05	-1.56516	0.00126278	0.0100523	1	0.339734	0.495153	2.08328	4.86622e-07	1.4954	0.000431764	-0.40369	1	-0.329681	0.553559	0.58788	0.379655	0.0116094
AFLA_015990	1.77636e-15	1	-1.77636e-15	1	3.55271e-15	1	8.88178e-16	1	0	1	-1.77636e-15	1	3.55271e-15	1	2.66454e-15	1	1.77636e-15	1	1
AFLA_016000	-0.642458	0.669706	-0.649843	0.677145	-2.55139	0.00973079	-1.09193	0.333443	3.49574	0.00011795	1.66813	0.090421	0.00738573	1	-1.45946	0.207118	1.82761	0.206778	1
AFLA_016010	-0.155792	0.964049	-0.137636	0.982841	-2.42348	0.00123876	-1.73162	0.0281106	-1.11468	0.0841167	-1.31809	0.0733909	-0.0181565	1	-0.691862	0.466857	0.203409	0.976212	0.203305
AFLA_016020	-2.2339	0.000394712	-1.98731	0.00146776	0.156714	0.83601	-0.0117388	1	3.38491	4.61356e-09	4.34524	2.66086e-10	-0.246588	1	0.168453	0.876404	-0.960333	0.223204	0.143634
AFLA_016030	-1.83528	1.49795e-11	-1.89633	6.10475e-12	-1.14506	4.10614e-08	-1.31652	7.38391e-09	-0.085316	0.622094	0.192462	0.289556	0.0610448	1	0.171461	0.446495	-0.277778	0.310725	0.258884
AFLA_016040	-1.88284	0.124407	-0.810792	0.592617	-1.63416	0.113617	-1.49614	0.18404	-0.828726	0.375156	0.0520709	1	-1.07205	0.997216	-0.138025	0.993824	-0.880797	0.679034	1
AFLA_016050	0.547264	0.07149	1.2476	6.59171e-05	-0.166094	0.571916	-0.121801	0.730712	0.272242	0.235961	0.437685	0.0893949	-0.700333	0.300578	-0.0442932	0.972843	-0.165443	0.798425	0.818449
AFLA_016060	0.209729	0.929244	1.7796	0.0607048	-1.76794	0.0269889	-0.969629	0.284664	-0.661965	0.365109	-1.12133	0.166452	-1.56987	0.63758	-0.798311	0.433233	0.459361	0.832598	1
AFLA_016070	0.461934	0.789674	0.461934	0.798182	-0.907012	0.395554	-0.196399	0.93306	-0.654029	0.483329	-0.579681	0.603445	3.55271e-15	1	-0.710613	0.60624	-0.0743475	1	0.833312
AFLA_016080	1.77636e-15	1	-1.77636e-15	1	3.55271e-15	1	8.88178e-16	1	0	1	-1.77636e-15	1	3.55271e-15	1	2.66454e-15	1	1.77636e-15	1	1
AFLA_016090	-1.51898	0.210497	-1.77636e-15	1	-1.28507	0.204372	-1.69549	0.112942	2.21206	0.0104509	0.595831	0.587575	-1.51898	0.837173	0.410423	0.808039	1.61623	0.284089	1
AFLA_016100	-1.92173	0.135418	-3.88611	0.00191889	2.87295	0.00738204	6.2866	8.33411e-07	8.576	2.12469e-11	9.82354	1.5858e-11	1.96438	0.694351	-3.41365	0.00396744	-1.24754	0.5033	0.274947
AFLA_016110	-0.827759	0.542133	-3.19872	0.0046454	2.4991	0.00994386	5.83008	5.40526e-07	6.94662	2.97354e-10	7.90678	2.61113e-10	2.37096	0.40831	-3.33098	0.00196493	-0.960164	0.599693	0.860905
AFLA_016120	-0.71248	0.00206324	-2.07712	1.22594e-11	2.42852	9.95734e-15	2.20753	5.18228e-13	4.41337	9.99368e-24	4.38683	4.65806e-22	1.36464	0.000101099	0.220987	0.367399	0.026544	1	0.0163912
AFLA_016130	-1.39141	3.11171e-05	-2.7011	5.81971e-11	2.55346	1.2191e-11	2.50589	7.24605e-11	4.75026	1.72979e-20	4.61965	1.60938e-18	1.30969	0.00893991	0.0475658	0.971308	0.130614	0.885037	0.889495
AFLA_016140	0.386517	0.0310928	-0.647779	0.000402832	2.22547	1.11657e-16	2.09341	2.73098e-15	2.44896	2.13366e-19	2.12842	3.61349e-16	1.0343	0.000136979	0.132063	0.517457	0.320544	0.145685	0.21768
AFLA_016150	0.94882	0.356114	1.7894	0.0570836	-7.84255	2.88902e-12	-7.25957	7.39951e-11	-5.56632	5.20881e-10	-5.01031	7.02169e-08	-0.84058	0.995491	-0.582985	0.595694	-0.556017	0.767678	1.10968e-07
AFLA_016160	0.921327	7.04009e-05	1.22901	6.63191e-07	1.26726	3.03331e-08	1.24949	1.23278e-07	1.36706	3.58718e-10	1.43819	1.87768e-09	-0.307679	0.809304	0.0177716	1	-0.0711245	0.931841	0.949152
AFLA_016170	-0.926194	0.00117496	-1.04947	0.000295816	-1.00532	8.45089e-05	-1.01925	0.000155598	0.15583	0.497237	-0.198925	0.444678	0.123273	1	0.013928	1	0.354754	0.363681	1.66658e-08
AFLA_016180	-1.43774	0.100252	-1.0298	0.269597	-1.16122	0.118242	-0.910682	0.27195	0.832048	0.201748	0.324027	0.710665	-0.407938	1	-0.250538	0.859208	0.508021	0.772076	2.75294e-08
AFLA_016190	-1.08372	0.0024111	-1.06347	0.00298629	-0.709829	0.0203118	-0.176207	0.659476	0.60238	0.0244006	0.284788	0.376748	-0.0202515	1	-0.533621	0.125632	0.317592	0.575017	0.962564
AFLA_016200	-0.0315891	1	0.246669	0.789258	-1.19455	0.0196741	-1.10386	0.0446973	-0.881246	0.0490891	-1.0134	0.0470584	-0.278258	1	-0.0906888	0.970049	0.132152	0.983033	0.00117802
AFLA_016210	-0.366949	0.632391	0.217907	0.826103	1.06658	0.038369	0.574253	0.331033	1.5135	0.00105634	1.88111	0.000392538	-0.584856	0.974288	0.492324	0.457268	-0.367616	0.761967	0.353464
AFLA_016220	-1.99592	0.0041589	-1.50918	0.0317795	-1.80736	0.00283175	-1.77166	0.00578833	0.855595	0.103558	0.848535	0.161418	-0.486746	1	-0.0356982	1	0.0070596	1	1
AFLA_016230	1.77636e-15	1	-1.77636e-15	1	0.382329	0.790688	0.0243557	1	1.7451	0.0672428	0.465674	0.722007	3.55271e-15	1	0.357973	0.86823	1.27943	0.499944	1
AFLA_016240	-0.270661	0.964897	0.0809207	1	-2.49586	0.0528512	-2.20066	0.115775	2.01018	0.0743066	3.70242	0.00421338	-0.351581	1	-0.295199	0.934294	-1.69224	0.427223	0.6568
AFLA_016250	0.0154534	1	-1.27689	0.000321814	-2.55828	8.79056e-11	-1.2854	0.000106097	-0.874121	0.00106247	-0.932547	0.0019745	1.29234	0.0220499	-1.27288	0.000176284	0.0584255	1	0.144021
AFLA_016260	-0.7375	0.118004	-0.385176	0.48274	-3.47782	4.6486e-11	-2.8062	2.05561e-08	-2.182	8.28242e-08	-2.26658	4.17608e-07	-0.352324	1	-0.671621	0.135147	0.0845756	1	0.316733
AFLA_016270	2.66454e-15	1	-8.88178e-16	1	-4.51965	2.90097e-09	-2.45044	0.000281819	-3.79502	8.40953e-09	-3.49769	4.87023e-07	3.55271e-15	1	-2.06922	0.00239127	-0.297334	0.881376	1
AFLA_016280	-0.642458	0.704101	-1.92202	0.141839	-2.37393	0.0272369	-0.168642	0.962124	1.15004	0.230703	0.487917	0.70147	1.27956	0.951274	-2.20529	0.0668909	0.662124	0.812122	1
AFLA_016290	-1.95083	0.00561341	-4.58167	2.47621e-08	-1.88607	0.0021358	-1.86839	0.0040969	0.0871165	0.927787	-0.0977077	0.931815	2.63084	0.0220499	-0.0176825	1	0.184824	0.962277	0.616214
AFLA_016300	-3.37028	6.65923e-06	-5.45976	4.19533e-10	0.888056	0.147009	0.870132	0.190643	2.23809	6.34071e-05	1.06273	0.0770678	2.08948	0.10553	0.0179241	1	1.17535	0.177505	0.00116312
AFLA_016310	-0.610966	0.37024	-8.88178e-16	1	2.66454e-15	1	-1.09193	0.0522742	8.88178e-16	1	-0.619646	0.248839	-0.610966	0.958898	1.09193	0.0617612	0.619646	0.494095	0.409877
AFLA_016320	-1.13947	0.103534	-4.05124	1.5879e-07	0.365305	0.587394	0.704767	0.289362	2.17217	6.81687e-05	2.30522	0.000160726	2.91177	0.00625989	-0.339462	0.699986	-0.133056	0.994984	0.670121
AFLA_016330	-0.523206	0.711721	-3.46671	0.00100475	-1.15337	0.210867	-1.43654	0.14207	-4.24617	1.45763e-06	-3.34232	0.000299342	2.9435	0.141115	0.283167	0.876486	-0.903849	0.589372	1
AFLA_016340	-4.58355	0.000458347	-3.8233	0.00310471	-5.13251	1.62552e-05	-5.01215	5.44605e-05	-1.798	0.0629676	-0.760884	0.530149	-0.760242	1	-0.120368	1	-1.03712	0.634671	0.0571792
AFLA_016350	-1.57485	0.143351	-0.649843	0.633351	-1.66128	0.0629532	-1.35761	0.16554	0.75302	0.353594	2.16851	0.0145897	-0.92501	0.997216	-0.303665	0.859336	-1.41549	0.306514	1
AFLA_016360	1.1889	6.25234e-06	-0.144688	0.660177	0.828435	0.00016889	1.15924	2.85211e-06	3.23813	6.53766e-19	3.40178	5.92048e-18	1.33358	0.000318347	-0.330803	0.177821	-0.163658	0.726797	0.147021
AFLA_016370	-0.610966	0.543531	-8.88178e-16	1	2.66454e-15	1	0	1	-2.86394	2.25798e-05	-1.88039	0.00859795	-0.610966	1	2.66454e-15	1	-0.983553	0.400638	0.198545
AFLA_016380	-0.642458	0.552561	-0.91651	0.361626	-0.389505	0.66909	-2.11132	0.00989114	-0.0991736	0.940637	-0.251393	0.799902	0.274052	1	1.72181	0.0432242	0.15222	1	0.190657
AFLA_016390	-0.660095	0.625003	-1.14292	0.333638	-3.07838	0.000941536	-2.31736	0.0173664	0.268241	0.789412	0.482816	0.643448	0.482826	1	-0.761016	0.532729	-0.214575	0.991172	0.274947
AFLA_016400	-1.5476	3.64824e-07	-2.24242	1.20482e-10	-2.80676	1.8937e-14	-2.04748	2.15634e-10	0.772144	0.000299215	0.78013	0.00107294	0.694822	0.217798	-0.759281	0.00352289	-0.0079867	1	0.539972
AFLA_016410	1.77636e-15	1	-1.77636e-15	1	3.55271e-15	1	8.88178e-16	1	0	1	-1.77636e-15	1	3.55271e-15	1	2.66454e-15	1	1.77636e-15	1	1
AFLA_016420	1.77636e-15	1	-1.77636e-15	1	3.55271e-15	1	8.88178e-16	1	0	1	-1.77636e-15	1	3.55271e-15	1	2.66454e-15	1	1.77636e-15	1	1
AFLA_016430	1.77636e-15	1	-1.77636e-15	1	3.55271e-15	1	8.88178e-16	1	0	1	-0.839967	0.0261752	3.55271e-15	1	2.66454e-15	1	0.839967	0.114625	0.820888
AFLA_016440	1.77636e-15	1	-0.711813	0.593562	-0.867599	0.364555	-1.29879	0.190806	2.18232	0.00586393	0.941683	0.311685	0.711813	1	0.431188	0.765707	1.24064	0.397738	0.176625
AFLA_016450	1.77636e-15	1	-1.77636e-15	1	3.55271e-15	1	8.88178e-16	1	0	1	-1.77636e-15	1	3.55271e-15	1	2.66454e-15	1	1.77636e-15	1	1
AFLA_016460	1.77636e-15	1	-1.77636e-15	1	3.55271e-15	1	8.88178e-16	1	0	1	-1.77636e-15	1	3.55271e-15	1	2.66454e-15	1	1.77636e-15	1	1
AFLA_016470	1.77636e-15	1	-1.77636e-15	1	3.55271e-15	1	8.88178e-16	1	0	1	-1.77636e-15	1	3.55271e-15	1	2.66454e-15	1	1.77636e-15	1	1
AFLA_016480	1.77636e-15	1	-1.77636e-15	1	3.55271e-15	1	8.88178e-16	1	0	1	-1.77636e-15	1	3.55271e-15	1	2.66454e-15	1	1.77636e-15	1	1
AFLA_016490	1.77636e-15	1	-1.77636e-15	1	3.55271e-15	1	8.88178e-16	1	-0.898045	0.0905882	0.334343	0.626214	3.55271e-15	1	2.66454e-15	1	-1.23239	0.157525	0.368264
AFLA_016500	1.27204	0.234725	1.27204	0.239761	-0.679812	0.471821	1.07556	0.26773	1.49589	0.0466983	1.44757	0.093109	2.66454e-15	1	-1.75537	0.0681925	0.0483145	1	1
AFLA_016510	-0.663702	0.00709703	-8.88178e-16	1	2.66454e-15	1	0	1	8.88178e-16	1	-8.88178e-16	1	-0.663702	0.174163	2.66454e-15	1	1.77636e-15	1	0.319931
AFLA_016520	-0.180524	0.919752	-0.473034	0.636135	-2.06169	0.00183201	-0.908765	0.209449	1.57983	0.00600749	1.11829	0.0864338	0.29251	1	-1.15292	0.119582	0.46154	0.763942	1
AFLA_016530	0.877176	0.028308	0.468976	0.284519	-1.03858	0.00278186	-0.252509	0.549412	0.712578	0.0177358	0.755329	0.0271004	0.4082	0.951384	-0.786068	0.0394769	-0.0427504	1	0.956784
AFLA_016540	1.45184	0.0037549	0.922202	0.0718397	-0.340909	0.470358	0.276734	0.612819	1.58099	7.62485e-05	1.62193	0.000271469	0.529643	0.941765	-0.617642	0.224928	-0.0409315	1	0.825602
AFLA_016550	2.13055	1.41124e-11	1.54045	2.48732e-08	-0.570903	0.00537182	-0.355584	0.108464	0.767575	5.40174e-05	0.565365	0.00567894	0.590107	0.238931	-0.21532	0.400288	0.20221	0.600098	0.000417795
AFLA_016560	0.110331	0.255653	0.165868	0.0718041	0.305857	0.000153908	0.14527	0.0825153	0.279752	9.44086e-05	0.308467	0.000134213	-0.0555372	1	0.160587	0.0632367	-0.028715	0.931841	0.636524
AFLA_016570	-0.732759	0.0457532	-0.489452	0.209113	-1.00225	0.00162667	-0.79922	0.0169395	0.371834	0.180259	0.361056	0.262096	-0.243307	1	-0.203034	0.651858	0.0107777	1	0.246602
AFLA_016580	-1.8611	0.0176084	-1.45511	0.0699451	-1.37211	0.0421405	-1.16624	0.112049	0.557345	0.366411	0.419834	0.575852	-0.40599	1	-0.205862	0.885351	0.137511	1	0.350285
AFLA_016590	-1.36917	0.0445725	-0.887404	0.22283	-0.00703584	1	0.458853	0.516034	1.83511	0.000502493	3.74579	4.75095e-08	-0.481762	1	-0.465889	0.552908	-1.91068	0.0125385	1
AFLA_016600	-1.42064	0.000222213	-0.996439	0.0080934	-0.614306	0.0575144	0.0524951	0.957565	1.60265	6.49962e-07	1.63026	4.10992e-06	-0.424199	0.918211	-0.666801	0.0642896	-0.0276082	1	0.820342
AFLA_016610	-1.29313	0.0924214	-2.2161	0.00338671	0.0205004	1	1.14855	0.101731	4.10032	5.01497e-09	4.32656	2.14147e-08	0.922974	0.880096	-1.12805	0.125457	-0.226237	0.941969	7.10088e-06
AFLA_016620	1.28903	4.18327e-07	0.925597	9.7212e-05	1.16829	2.45303e-07	1.55283	2.23995e-09	0.644607	0.0003183	0.510241	0.00942759	0.363437	0.690626	-0.384544	0.0816241	0.134366	0.776885	0.0623718
AFLA_016630	-0.475569	0.00186814	-0.51295	0.000879199	-0.579374	3.25442e-05	-0.4759	0.000826843	-0.131455	0.261494	-0.24116	0.0645388	0.0373813	1	-0.103474	0.55903	0.109705	0.693021	0.00729953
AFLA_016640	-0.663565	0.000708554	-0.653031	0.000861126	-0.114465	0.540375	-0.214372	0.250107	-0.212172	0.147225	-0.587472	0.000565398	-0.0105333	1	0.0999075	0.683693	0.375301	0.105558	0.261871
AFLA_016650	-0.329572	0.0129492	-0.0581141	0.772813	0.10644	0.385383	-0.348733	0.00446179	-0.332152	0.00117744	-0.192814	0.0920479	-0.271458	0.435584	0.455173	0.000411109	-0.139338	0.475894	0.0138876
AFLA_016660	0.192886	0.259132	0.106755	0.599037	-0.188096	0.177142	-0.183657	0.22618	0.025436	0.888947	-0.149738	0.286652	0.0861309	1	-0.00443944	1	0.175174	0.441373	0.150863
AFLA_016670	0.0939421	0.369018	0.102028	0.326942	0.211674	0.00865823	0.201662	0.0189293	0.0324757	0.691458	-0.0412865	0.655568	-0.00808588	1	0.0100121	1	0.0737622	0.647611	0.204015
AFLA_016680	-2.44259	0.00421447	-2.76796	0.00133701	-0.632886	0.426096	-1.05771	0.1925	-0.807351	0.216361	-1.31457	0.0730671	0.325375	1	0.424821	0.699888	0.507221	0.772543	0.989124
AFLA_016690	-2.39742	0.000942759	-2.25096	0.00183979	0.255546	0.739218	0.246244	0.784374	-0.778582	0.15172	-0.494812	0.453445	-0.146454	1	0.00930218	1	-0.28377	0.891763	0.833359
AFLA_016700	-0.649681	0.000244209	-0.551416	0.0015802	-0.373988	0.0120501	-0.447948	0.0049484	0.509895	0.000183946	0.375268	0.0114477	-0.0982648	1	0.0739599	0.753819	0.134628	0.65438	0.00473872
AFLA_016710	-2.21939	0.00640805	0.091103	1	-0.526394	0.497414	-0.783858	0.329696	-0.788922	0.205207	-0.699832	0.338798	-2.3105	0.140618	0.257465	0.841468	-0.0890897	1	0.453462
AFLA_016720	-1.88839	0.0128766	-1.09112	0.175434	0.297555	0.709442	0.16557	0.89445	-1.52507	0.00806602	-0.806863	0.227633	-0.797269	0.942711	0.131984	0.953764	-0.718206	0.544823	0.0189253
AFLA_016730	-0.267949	0.0342381	-0.244185	0.0573116	0.481932	3.1293e-05	0.175133	0.139784	0.418823	3.7919e-05	0.389971	0.000469808	-0.0237639	1	0.306799	0.0105111	0.0288521	0.980298	0.0162946
AFLA_016740	-0.369396	0.025963	-0.390062	0.019203	-0.0245905	0.933483	0.174376	0.279443	-0.312391	0.0124298	-0.425414	0.00306879	0.0206657	1	-0.198966	0.238976	0.113023	0.718514	0.462618
AFLA_016750	-0.260103	0.19943	-0.434267	0.0245956	-0.0175918	0.985423	0.117702	0.564156	0.812694	7.55205e-07	0.428591	0.00935548	0.174165	0.995729	-0.135294	0.541287	0.384103	0.0936268	1
AFLA_016760	2.04975	0.00024357	1.84592	0.000845892	1.96979	6.82664e-05	1.38355	0.00590187	-0.236685	0.605382	0.494976	0.308396	0.203831	1	0.58624	0.301863	-0.731662	0.317097	0.0297266
AFLA_016770	1.02442	0.189881	0.573986	0.530062	1.65278	0.00977486	0.833516	0.24327	0.391637	0.518063	1.02957	0.107776	0.450432	1	0.819267	0.286104	-0.637938	0.596516	0.820342
AFLA_016780	0.461934	0.698211	-0.454576	0.718202	2.09673	0.00617497	2.09673	0.0100808	2.36993	0.000580715	3.45351	2.24951e-05	0.91651	0.94756	2.66454e-15	1	-1.08358	0.380358	0.907063
AFLA_016790	1.439	0.195218	1.90658	0.0774476	2.12167	0.0190079	2.03333	0.0360033	2.64856	0.00109951	3.73099	8.60406e-05	-0.46758	1	0.0883354	1	-1.08242	0.487114	0.489415
AFLA_016800	0.0111278	1	0.104473	0.722018	0.540979	0.00252601	0.408681	0.0309748	0.184496	0.243204	0.110806	0.573122	-0.0933448	1	0.132297	0.587432	0.0736901	0.911076	0.194397
AFLA_016810	0.330213	0.00340297	0.382726	0.000811062	0.153836	0.11661	0.764301	2.27579e-09	0.323578	0.000253714	-0.343127	0.00055316	-0.0525128	1	-0.610465	3.74934e-07	0.666705	5.69742e-07	0.800678
AFLA_016820	-0.0715345	0.905826	-0.093062	0.85154	0.553135	0.0211052	0.697561	0.00667904	0.225014	0.297722	-0.107866	0.704095	0.0215275	1	-0.144426	0.683584	0.33288	0.395285	0.320569
AFLA_016830	0.177219	0.246673	0.486435	0.000769782	0.66818	1.1639e-06	0.704824	1.24468e-06	0.210193	0.0494571	0.0734342	0.591925	-0.309216	0.378492	-0.0366449	0.889218	0.136758	0.533455	0.556699
AFLA_016840	0.517259	0.0175757	0.132393	0.647083	-1.50942	4.1271e-10	-0.841487	6.32989e-05	-0.96923	3.14904e-07	-1.47857	6.04982e-10	0.384867	0.590089	-0.667929	0.00142075	0.509338	0.0444841	0.0403951
AFLA_016850	-0.0645931	0.916048	0.110315	0.788334	-0.467881	0.0404576	0.231972	0.382134	0.187405	0.369697	0.148137	0.557798	-0.174909	1	-0.699853	0.00563457	0.0392678	1	0.316492
AFLA_016860	-0.241102	0.856295	0.733481	0.399467	-0.365821	0.63136	-0.340249	0.69694	-7.33223	3.38927e-15	-7.43413	6.96433e-14	-0.974583	0.858745	-0.0255718	1	0.101895	1	0.0022698
AFLA_016870	-0.175133	0.257733	-0.169204	0.281903	0.514486	7.5228e-05	0.267077	0.0434292	0.350662	0.00146434	0.206266	0.0950126	-0.00592853	1	0.247409	0.0730678	0.144396	0.501821	1.51252e-05
AFLA_016880	0.119176	0.658443	0.306133	0.158795	-0.960872	1.35763e-06	-0.717988	0.000246018	-0.349257	0.024501	-0.445453	0.0119799	-0.186957	0.996917	-0.242884	0.250539	0.0961951	0.85091	0.0162267
AFLA_016890	-0.681246	0.0140859	-0.366865	0.219059	-0.68155	0.00463304	-0.555643	0.0299146	-0.540093	0.0101032	-0.678325	0.00473392	-0.314381	0.918211	-0.125907	0.734631	0.138232	0.83016	0.737575
AFLA_016900	-0.247408	0.260538	-0.232841	0.300016	-0.329561	0.060445	0.110076	0.622679	0.104303	0.531415	0.435386	0.0126628	-0.0145671	1	-0.439637	0.0232176	-0.331082	0.197485	0.979086
AFLA_016910	-0.406523	0.00941736	-0.348689	0.0276377	0.300328	0.0259998	0.0240977	0.946748	-0.429482	0.000452311	-0.633693	1.32256e-05	-0.0578342	1	0.27623	0.0672158	0.204211	0.338749	0.714873
AFLA_016920	0.197939	0.22346	0.0890232	0.664951	-0.208101	0.117386	-0.334313	0.0171696	-0.137308	0.241392	-0.13016	0.342474	0.108916	1	0.126212	0.453827	-0.00714876	1	1
AFLA_016930	-0.38952	0.433831	-0.594892	0.197905	-0.173967	0.699937	0.228468	0.63432	-0.911921	0.00556173	-0.313063	0.431474	0.205372	1	-0.402434	0.38788	-0.598858	0.299503	0.421732
AFLA_016940	0.251579	0.448244	-0.0893749	0.869366	0.0532494	0.899239	0.681025	0.00993419	-0.0735141	0.786621	0.0655261	0.849865	0.340954	0.895966	-0.627775	0.0215336	-0.13904	0.839779	0.212946
AFLA_016950	-0.20837	0.286087	-0.132352	0.5551	0.586286	0.000250694	0.529496	0.00153627	-0.461128	0.00089378	-0.317747	0.0386592	-0.0760181	1	0.0567904	0.841103	-0.14338	0.640906	0.757096
AFLA_016960	-0.703183	5.14592e-05	-0.579191	0.000630597	0.0888755	0.588691	0.0986379	0.580652	0.255316	0.0413102	0.0126376	0.988062	-0.123992	1	-0.00976244	1	0.242678	0.263105	0.0509237
AFLA_016970	0.00916596	1	-0.062205	0.989352	0.341327	0.362599	0.441406	0.265852	0.171056	0.62092	0.0994839	0.836171	0.0713709	1	-0.100079	0.898933	0.0715721	1	0.0793994
AFLA_016980	-0.870695	0.0973444	-0.0725309	0.997958	-5.84968	1.21692e-15	-5.0827	2.30048e-13	-7.17555	1.20572e-19	-7.08424	6.39368e-18	-0.798164	0.70818	-0.766978	0.127132	-0.0913136	1	0.0168573
AFLA_016990	-0.0559917	0.945673	-0.0612086	0.94067	0.511765	0.0295494	0.269959	0.315044	0.257036	0.219848	0.128522	0.630823	0.00521687	1	0.241806	0.417691	0.128514	0.848852	0.0590739
AFLA_017000	-0.0652478	0.876059	-0.180536	0.501609	0.898229	1.32055e-05	1.00891	5.20397e-06	0.025186	0.938691	0.294158	0.125288	0.115289	1	-0.110685	0.699033	-0.268972	0.384538	0.00101114
AFLA_017010	-0.265856	0.160007	-0.242831	0.210976	0.255666	0.104698	0.104709	0.592677	0.69577	4.14777e-06	0.464525	0.00312011	-0.0230256	1	0.150957	0.449815	0.231245	0.353856	0.735287
AFLA_017020	1.04237	0.0001948	0.923212	0.000833522	1.50124	5.4829e-08	1.21221	7.31789e-06	0.00845988	1	-0.0399462	0.924626	0.119162	1	0.289031	0.310004	0.048406	1	0.132894
AFLA_017030	0.163051	0.756431	0.276398	0.544788	0.547075	0.085501	0.151364	0.727457	0.614258	0.0261856	1.05098	0.00108598	-0.113347	1	0.395711	0.30105	-0.436717	0.397523	0.090341
AFLA_017040	-0.426291	0.311791	-0.253641	0.61006	0.151917	0.706005	0.224181	0.588976	1.72095	2.77795e-07	1.45689	3.42125e-05	-0.17265	1	-0.0722636	0.941439	0.264066	0.71605	0.334882
AFLA_017050	-0.577075	0.563053	-0.403372	0.731153	-0.254502	0.780699	0.292301	0.772533	1.63753	0.00798014	1.58266	0.0234748	-0.173703	1	-0.546803	0.566984	0.0548703	1	0.980618
AFLA_017060	1.14438	0.427968	2.04982	0.116912	1.52461	0.168855	1.28185	0.297619	5.53094	3.92223e-07	4.71727	4.03919e-05	-0.905444	1	0.242758	0.937705	0.813669	0.740158	0.820342
AFLA_017070	0.587967	0.405089	0.3195	0.717921	0.564306	0.316049	0.517421	0.409009	1.69747	0.000468005	1.5559	0.00385945	0.268467	1	0.0468846	1	0.141569	0.980469	0.328258
AFLA_017080	3.32665	0.000230777	4.31819	5.30909e-06	2.77931	0.000377077	4.94155	1.19136e-07	3.17026	1.15637e-05	3.02916	0.000128228	-0.99154	0.918352	-2.16223	0.0097669	0.141104	1	0.538111
AFLA_017090	-0.362332	0.0279918	-0.288382	0.0886876	0.36559	0.0100035	0.222317	0.152344	0.325873	0.00884266	0.343562	0.0149055	-0.07395	1	0.143273	0.425623	-0.0176893	1	0.0104971
AFLA_017100	-0.698614	0.0232809	-0.888151	0.0041231	-1.82404	1.26832e-08	-1.02869	0.000400283	-0.455505	0.049057	-0.634503	0.0162704	0.189537	1	-0.795349	0.00660555	0.178997	0.780473	0.344309
AFLA_017110	-0.872786	0.000986251	-1.01006	0.000185094	-1.79504	5.10285e-10	-1.40088	2.98848e-07	0.0233259	0.962874	-0.153759	0.533928	0.137273	1	-0.394159	0.12403	0.177085	0.721168	0.531416
AFLA_017120	0.0211569	1	-0.170393	0.565848	-0.180319	0.411488	0.00723389	1	-0.410697	0.0209022	-0.321972	0.114898	0.19155	1	-0.187553	0.477838	-0.0887258	0.902636	0.706883
AFLA_017130	-0.232581	0.114923	-0.244193	0.0988889	0.446555	0.00043908	0.170982	0.21234	0.14448	0.186399	-0.077192	0.573226	0.0116123	1	0.275573	0.0445886	0.221672	0.225642	0.519013
AFLA_017140	-0.0645286	0.968757	-0.314275	0.471652	0.76919	0.0148063	0.845158	0.0121882	0.366171	0.190219	0.335601	0.30401	0.249746	1	-0.0759684	0.926883	0.0305702	1	0.122406
AFLA_017150	0.109137	0.759491	0.0253968	1	0.378959	0.0775145	0.451192	0.0491377	0.193998	0.314882	0.077612	0.772064	0.0837403	1	-0.0722324	0.861603	0.116386	0.849798	1
AFLA_017160	-0.244062	0.575048	-0.0502522	0.997351	-0.460908	0.134989	-0.406974	0.229772	1.29082	9.14537e-06	0.953568	0.00193826	-0.193809	1	-0.0539342	0.969599	0.337252	0.537115	0.0165656
AFLA_017170	-0.13154	0.523445	0.0270626	0.985291	0.722182	7.8426e-06	0.517683	0.00129433	0.386158	0.00333446	0.393001	0.00812943	-0.158602	0.993797	0.204499	0.246033	-0.00684351	1	0.319801
AFLA_017180	0.0429164	1	0.354964	0.472728	-0.398007	0.285719	0.0528086	0.967991	-0.101544	0.798255	-0.211484	0.596958	-0.312048	1	-0.450816	0.296045	0.10994	0.961085	0.820342
AFLA_017190	0.284279	0.206553	0.16019	0.543846	0.264702	0.155636	0.379365	0.0533412	0.590592	0.000377737	0.872837	1.01148e-05	0.124088	1	-0.114663	0.666268	-0.282245	0.325837	0.99733
AFLA_017200	-0.304411	0.0380271	-0.202523	0.192505	-0.440383	0.000628772	-0.273609	0.0421379	-0.263078	0.0166818	-0.351926	0.00523902	-0.101888	1	-0.166774	0.266669	0.0888474	0.763947	0.844541
AFLA_017210	0.143907	0.402001	0.1605	0.344349	0.0374258	0.841793	0.320689	0.0213131	-0.427017	0.000319942	-0.233075	0.0734224	-0.0165927	1	-0.283264	0.0508243	-0.193942	0.351272	0.756417
AFLA_017220	-1.91251	8.79382e-09	-1.35464	6.86686e-06	-6.5692	1.04813e-24	-5.88003	1.2256e-22	-6.15306	1.89361e-25	-5.83432	3.7493e-23	-0.557865	0.465818	-0.68917	0.00976583	-0.318748	0.424453	0.204632
AFLA_017230	-1.88341	0.277893	-3.75191	0.019713	-0.461013	0.803669	0.707124	0.70268	-2.71487	0.0240545	-2.6731	0.0512633	1.8685	0.905998	-1.16814	0.523585	-0.0417711	1	0.42883
AFLA_017240	1.77636e-15	1	-0.665952	0.416436	0.346529	0.625526	0.727533	0.291602	0	1	-0.837223	0.174333	0.665952	0.987666	-0.381004	0.66703	0.837223	0.400117	0.185497
AFLA_017250	-0.871574	0.332511	-8.88178e-16	1	-0.0388447	1	-0.50868	0.55548	0.33375	0.629058	-0.287241	0.735565	-0.871574	0.941629	0.469835	0.637397	0.620991	0.66431	1
AFLA_017260	1.77636e-15	1	-1.77636e-15	1	3.55271e-15	1	-1.67	0.000178404	0	1	-1.77636e-15	1	3.55271e-15	1	1.67	0.000250887	1.77636e-15	1	0.44616
AFLA_017270	0.610281	0.576121	0.610281	0.588116	3.55271e-15	1	-0.644149	0.481408	1.08955	0.103021	1.08955	0.156979	3.55271e-15	1	0.644149	0.525148	1.77636e-15	1	0.176625
AFLA_017280	0.605911	0.0302424	0.320087	0.298649	1.22798	3.4864e-06	1.24271	7.32386e-06	0.345933	0.100479	0.992815	8.21723e-05	0.285824	0.950946	-0.0147283	1	-0.646882	0.0464964	0.869933
AFLA_017290	0.789564	0.000206197	0.791325	0.000208466	-1.0599	2.40065e-07	-0.844241	2.89383e-05	-0.489091	0.00206078	-0.242879	0.178677	-0.00176087	1	-0.215655	0.320748	-0.246212	0.397523	0.012695
AFLA_017300	-5.3927	1.2446e-18	-6.18821	2.29786e-20	-5.26171	7.13543e-20	-5.01821	1.36327e-18	-4.25566	9.68749e-19	-4.20788	4.57627e-17	0.79551	0.264481	-0.2435	0.513911	-0.0477846	1	0.0144302
AFLA_017310	1.77636e-15	1	-1.77636e-15	1	3.55271e-15	1	8.88178e-16	1	0	1	-1.77636e-15	1	3.55271e-15	1	2.66454e-15	1	1.77636e-15	1	1
AFLA_017320	1.77636e-15	1	-1.77636e-15	1	3.55271e-15	1	8.88178e-16	1	0	1	-1.77636e-15	1	3.55271e-15	1	2.66454e-15	1	1.77636e-15	1	1
AFLA_017330	-0.273812	0.107676	-0.25198	0.146551	0.179763	0.221917	-0.168157	0.298886	0.0813705	0.550863	-0.07077	0.667875	-0.0218312	1	0.34792	0.0275558	0.15214	0.558493	0.76493
AFLA_017340	-0.424859	0.175691	-0.674189	0.0253467	-0.436125	0.0927604	0.0810025	0.848622	-0.0535363	0.869036	-0.319118	0.2248	0.24933	1	-0.517128	0.0724882	0.265581	0.577526	0.725193
AFLA_017350	-0.167852	0.661821	-0.198602	0.596616	1.15056	2.11338e-05	0.756627	0.005143	1.5778	6.67659e-09	1.3905	9.06921e-07	0.0307499	1	0.393932	0.17894	0.187305	0.74457	0.196182
AFLA_017360	0.0779604	0.80399	0.332252	0.117429	0.0287784	0.940881	0.14904	0.480438	-0.169497	0.282995	-0.58217	0.00113838	-0.254292	0.87447	-0.120262	0.628138	0.412673	0.0911644	0.265688
AFLA_017370	-0.256609	0.179155	-0.218459	0.272115	0.166308	0.311775	0.14785	0.422024	-0.47628	0.000733736	-0.179001	0.266566	-0.0381501	1	0.0184581	1	-0.297279	0.194889	0.293478
AFLA_017380	-0.369451	0.25835	-0.473207	0.134341	-0.579373	0.0260396	-0.477276	0.0904864	-1.99748	6.43631e-11	-1.45325	7.3375e-07	0.103756	1	-0.102097	0.825012	-0.544224	0.143699	0.369803
AFLA_017390	0.169205	0.462562	0.210723	0.341566	1.19903	7.9421e-09	0.970729	1.47776e-06	0.422319	0.00498793	0.15466	0.389795	-0.0415179	1	0.228298	0.261656	0.267659	0.313184	0.255955
AFLA_017400	0.039809	0.831384	0.118813	0.357852	0.452419	1.95462e-05	0.437862	7.31971e-05	0.115538	0.186399	0.223877	0.0226623	-0.079004	1	0.0145573	0.986528	-0.108339	0.544493	0.746896
AFLA_017410	-3.68041	4.15027e-09	-3.93286	9.30345e-10	0.797019	0.0768964	-0.422503	0.423333	-2.5078	6.78756e-08	-0.765573	0.0878969	0.252458	1	1.21952	0.0136811	-1.74223	0.00283515	0.0153269
AFLA_017420	0.393136	0.190734	0.252595	0.453168	1.22045	5.48356e-06	1.09185	7.04495e-05	-0.0174247	0.992394	0.7337	0.0030162	0.140542	1	0.128604	0.736309	-0.751125	0.0209162	1
AFLA_017430	-0.0680159	0.864273	0.123076	0.685167	0.814984	5.15036e-05	0.669465	0.00116278	0.556883	0.0010791	0.270763	0.158913	-0.191092	1	0.145519	0.574817	0.28612	0.342573	0.605014
AFLA_017440	-0.201768	0.959102	-2.57954	0.0162123	-1.14719	0.22765	-1.16507	0.259787	3.60064	3.08472e-05	2.61444	0.00463452	2.37777	0.355059	0.0178759	1	0.986199	0.556328	2.26304e-07
AFLA_017450	-1.6012	0.203505	-0.337688	0.892284	-1.89451	0.0651347	-2.17265	0.0480234	-2.04321	0.0224612	-0.797189	0.469537	-1.26351	0.941635	0.278137	0.907217	-1.24602	0.476607	0.400831
AFLA_017460	-3.72454	1.13785e-07	-4.17565	1.08017e-08	-1.7868	0.000982211	-0.607267	0.316936	0.93205	0.0445936	0.135491	0.857856	0.451107	1	-1.17953	0.0458186	0.796559	0.344987	0.0291719
AFLA_017470	1.77636e-15	1	-1.77636e-15	1	3.55271e-15	1	8.88178e-16	1	0	1	-1.77636e-15	1	3.55271e-15	1	2.66454e-15	1	1.77636e-15	1	0.434108
AFLA_017480	-1.41205	6.65087e-10	-1.01189	7.34304e-07	-0.759146	1.04556e-05	-0.783754	1.56673e-05	0.620153	3.2457e-05	1.27405	4.06195e-10	-0.400152	0.380268	0.0246079	0.984176	-0.653897	0.00162958	0.33895
AFLA_017490	0.197146	0.574843	0.316497	0.31691	0.943429	0.00021373	0.00199671	1	-0.988041	2.05031e-05	-0.931508	0.000245702	-0.119351	1	0.941432	0.000623058	-0.0565332	0.992948	0.166885
AFLA_017500	0.243728	0.133036	0.403222	0.0102545	0.40891	0.00269163	-0.21551	0.143848	-0.429608	0.000441634	-0.597892	3.06371e-05	-0.159494	0.954112	0.62442	6.09249e-05	0.168283	0.460993	2.4176e-09
AFLA_017510	-0.447468	0.00108497	-0.373041	0.00607313	0.323477	0.00574156	0.26665	0.0324668	0.354567	0.000733736	0.638682	1.00378e-06	-0.0744273	1	0.0568272	0.760139	-0.284115	0.0783153	0.820342
AFLA_017520	0.126207	0.464432	0.150524	0.369704	0.332763	0.00921516	0.285851	0.0361981	-0.255341	0.0219164	0.0538143	0.725961	-0.0243167	1	0.0469121	0.841079	-0.309155	0.0801998	0.643314
AFLA_017530	0.247154	0.34407	0.167605	0.573227	0.056569	0.848535	0.469353	0.0305799	0.912358	3.61306e-06	1.27565	7.44368e-08	0.0795493	1	-0.412784	0.0685617	-0.363288	0.227236	0.0968296
AFLA_017540	-0.188195	0.0591033	-0.097272	0.388442	-0.0384247	0.710837	0.0941182	0.333443	-0.157898	0.0332522	-0.202111	0.0168159	-0.0909226	0.992317	-0.132543	0.178749	0.044213	0.862052	1
AFLA_017550	0.033399	1	-0.137996	0.802609	-0.183145	0.595991	0.325034	0.347281	0.352213	0.18564	0.231617	0.47409	0.171395	1	-0.508178	0.138614	0.120596	0.917813	0.581143
AFLA_017560	-0.159568	0.19036	-0.134165	0.291685	-0.00857468	1	-0.349662	0.00119307	0.118986	0.176858	-0.236952	0.0168371	-0.025403	1	0.341087	0.0020622	0.355938	0.00613555	0.416346
AFLA_017570	0.241027	0.636585	0.182951	0.756192	-0.694021	0.0422445	-1.159	0.00171167	-0.235274	0.461818	-0.55004	0.10876	0.0580751	1	0.464981	0.253094	0.314765	0.645093	0.000294815
AFLA_017580	0.100966	0.507716	0.218983	0.0981285	0.20888	0.0592714	0.232783	0.0495408	-0.0363964	0.758245	-0.023744	0.889522	-0.118017	0.993797	-0.0239027	0.942929	-0.0126524	1	0.0568134
AFLA_017590	-0.212986	0.671709	-0.0679157	0.970691	-0.0743929	0.890575	0.474734	0.190529	0.268445	0.37117	0.0759363	0.87636	-0.145071	1	-0.549127	0.144226	0.192509	0.825216	0.384962
AFLA_017600	1.78654	2.99414e-10	1.51206	1.32881e-08	1.34303	1.15371e-08	2.06467	1.79732e-12	0.229865	0.181656	0.484775	0.0123423	0.274473	0.887115	-0.721646	0.000880726	-0.25491	0.428358	3.02273e-08
AFLA_017610	-0.391891	0.0570643	-0.250404	0.258702	0.0298383	0.935201	0.176738	0.386074	-0.293315	0.0555567	-0.592374	0.000918022	-0.141486	1	-0.146899	0.530981	0.299058	0.258386	0.860905
AFLA_017620	-0.327035	0.351346	-0.115631	0.824052	0.138009	0.669525	0.165824	0.63562	-0.502198	0.0343652	-0.364287	0.186002	-0.211404	1	-0.0278153	1	-0.137911	0.867931	0.746896
AFLA_017630	0.965794	0.224763	0.965794	0.229906	3.55271e-15	1	-0.461471	0.560651	-0.855016	0.12992	-1.77636e-15	1	3.55271e-15	1	0.461471	0.60433	-0.855016	0.419321	0.0190316
AFLA_017640	0.491655	0.440684	0.707205	0.236919	0.477596	0.343541	0.748286	0.151737	3.17648	1.60101e-09	2.06561	4.2177e-05	-0.215549	1	-0.270691	0.706406	1.11086	0.093064	0.00195388
AFLA_017650	-0.33607	0.367965	-0.151383	0.761124	0.336057	0.260755	0.585296	0.0579136	0.438827	0.0808999	0.347941	0.23635	-0.184686	1	-0.249239	0.511158	0.0908856	0.956337	0.000559775
AFLA_017660	-0.000351253	1	0.210734	0.699285	0.198731	0.609978	0.721498	0.0453886	0.469677	0.111297	0.395822	0.250861	-0.211086	1	-0.522768	0.181125	0.0738557	0.998287	0.879416
AFLA_017670	-0.874549	0.557276	-0.0900845	1	2.97428	0.00492754	1.28049	0.281748	2.00937	0.028714	1.38588	0.194107	-0.784464	1	1.69379	0.16207	0.623491	0.822856	0.458396
AFLA_017680	-0.368298	0.0277792	-0.262176	0.132544	-0.105655	0.508161	0.148093	0.373979	0.176175	0.165692	0.183455	0.210173	-0.106122	1	-0.253748	0.120128	-0.00728014	1	0.113391
AFLA_017690	-0.502285	0.00314268	-0.420914	0.0134653	-0.405802	0.00571339	-0.292168	0.063019	0.204097	0.111337	0.0700211	0.680819	-0.0813712	1	-0.113635	0.567705	0.134075	0.647324	1
AFLA_017700	-0.267403	0.0394451	-0.112534	0.462913	-0.220718	0.0470888	-0.312642	0.00855038	-0.298714	0.00249583	-0.138835	0.220863	-0.154869	0.893061	0.0919243	0.536146	-0.159878	0.373535	0.000879795
AFLA_017710	0.173327	0.0506979	0.27251	0.00212005	0.72567	6.00141e-12	0.618097	1.03208e-09	0.365611	1.05651e-06	0.663373	5.04183e-11	-0.0991836	0.918211	0.107574	0.229393	-0.297762	0.00245881	0.000342946
AFLA_017720	-0.34549	0.0245143	-0.359603	0.0198255	-0.269815	0.0409747	-0.148096	0.328057	-0.407768	0.000626709	-0.372	0.00500572	0.0141128	1	-0.121719	0.478265	-0.0357681	0.977162	0.21038
AFLA_017730	-0.298798	0.19036	-0.121169	0.683451	-0.102421	0.639304	-0.109172	0.652295	0.563835	0.000774659	0.797776	5.07414e-05	-0.17763	1	0.00675036	1	-0.233941	0.457893	0.359609
AFLA_017740	-3.2816	0.0214262	-3.73241	0.00912344	0.94525	0.484412	1.48282	0.286281	-2.72406	0.0114256	-3.87388	0.00183507	0.450806	1	-0.537566	0.793173	1.14982	0.635674	0.196195
AFLA_017750	-0.8023	0.520439	0.50386	0.741346	-4.84252	1.48006e-06	-5.42853	5.3196e-07	-6.72357	1.16754e-10	-6.6473	2.58925e-09	-1.30616	0.874232	0.586009	0.650095	-0.0762731	1	2.98159e-06
AFLA_017760	-0.21503	0.928774	-1.04704	0.322059	-1.90088	0.0200675	-1.90494	0.0296169	-3.31747	1.86565e-05	-3.54444	4.32882e-05	0.832011	0.998962	0.00405552	1	0.226967	0.976001	6.0868e-05
AFLA_017770	0.896665	0.00168211	0.272017	0.405197	1.24731	3.50737e-06	1.0021	0.000201821	1.70245	5.77816e-10	2.12158	6.16547e-11	0.624647	0.364191	0.245213	0.429445	-0.419125	0.253191	0.679926
AFLA_017780	-0.168008	0.340449	-0.0665727	0.786928	-0.536599	0.000170988	-0.549757	0.000269059	-0.00664448	1	0.0551062	0.741596	-0.101435	1	0.0131587	1	-0.0617507	0.896364	0.899361
AFLA_017790	-0.815377	0.0617686	-1.132	0.00895134	-1.34745	0.000426401	-1.88183	1.0261e-05	-2.01349	1.24732e-07	-1.8617	4.6818e-06	0.316623	1	0.534379	0.223149	-0.151783	0.914792	0.00137592
AFLA_017800	-0.939864	0.0081763	-1.20006	0.000893858	-1.26078	9.02331e-05	-1.1595	0.000536752	-0.314083	0.251643	-0.734483	0.0161748	0.2602	1	-0.101281	0.866607	0.4204	0.401194	0.000131034
AFLA_017810	0.116988	0.627227	0.166953	0.453937	0.632286	0.000182966	0.56861	0.00123683	-0.631949	3.37459e-05	-0.593934	0.000383539	-0.0499651	1	0.0636763	0.824971	-0.0380149	0.991172	0.609053
AFLA_017820	-0.464574	0.083985	-0.141263	0.702413	0.223791	0.352983	0.423975	0.0837964	0.562184	0.00502545	0.650491	0.00434379	-0.323312	0.881651	-0.200185	0.503128	-0.0883073	0.925043	0.0882495
AFLA_017830	-0.135315	0.786061	-0.213572	0.623217	0.475407	0.100739	0.291162	0.382474	0.26998	0.295808	0.278045	0.354623	0.0782568	1	0.184245	0.656231	-0.00806501	1	0.000531655
AFLA_017840	0.0355221	1	-0.105097	0.899505	-4.17852	3.91641e-15	-3.28161	8.97081e-12	0.56694	0.0487437	1.14712	0.000663178	0.140619	1	-0.89691	0.013504	-0.580178	0.236021	0.0878117
AFLA_017850	-1.64324	2.55425e-07	-2.24056	3.25505e-10	1.10634	2.35519e-05	0.475542	0.0709665	-1.15535	1.54808e-06	-0.565517	0.0201035	0.597319	0.412676	0.630801	0.0192827	-0.589834	0.0813557	0.0779853
AFLA_017860	-1.26794	0.0277375	-1.16277	0.0464342	0.928317	0.061239	0.509206	0.374418	-1.45088	0.00107247	-0.609087	0.228379	-0.105169	1	0.419112	0.524234	-0.841798	0.260486	0.671159
AFLA_017870	0.348826	0.0371097	0.363266	0.0306845	0.930333	4.25427e-08	0.705869	1.60398e-05	0.26236	0.0362167	0.428496	0.00301847	-0.01444	1	0.224464	0.177317	-0.166136	0.508516	2.21847e-06
AFLA_017880	-0.780786	0.0194625	-0.727578	0.0310788	1.78769	1.0274e-07	1.27605	7.35803e-05	0.664061	0.00864181	1.3499	1.327e-05	-0.0532074	1	0.51164	0.117025	-0.685842	0.0859315	0.0242167
AFLA_017890	-0.477547	0.00600549	-0.250104	0.174447	0.0758424	0.670787	-0.327007	0.0414885	1.11241	1.32681e-10	1.42	7.45061e-12	-0.227443	0.846316	0.402849	0.0146345	-0.307592	0.15269	0.000150587
AFLA_017900	-0.446887	0.116594	-0.427264	0.139482	-0.386607	0.108025	-0.131565	0.674942	0.746719	0.000526448	0.824672	0.000702715	-0.0196223	1	-0.255042	0.392278	-0.0779531	0.951328	0.0151742
AFLA_017910	-0.194408	0.220528	-0.0907339	0.646132	0.354133	0.00599536	0.110292	0.472987	-0.18431	0.101389	-0.231456	0.0707148	-0.103675	1	0.243841	0.0917111	0.0471462	0.933338	0.579741
AFLA_017920	0.19276	0.234733	0.160638	0.344488	1.04535	4.50963e-10	0.78662	5.3896e-07	-0.0655246	0.607285	0.0126909	0.980584	0.0321215	1	0.258734	0.0768086	-0.0782155	0.818589	0.541634
AFLA_017930	1.12809	0.00542465	0.889522	0.0297737	1.01217	0.00401087	0.71654	0.0560705	1.77989	3.9965e-07	2.60411	2.08074e-09	0.238573	1	0.295627	0.524463	-0.824218	0.088892	0.421433
AFLA_017940	0.159438	0.718071	-0.070808	0.943951	-0.330693	0.250601	-0.193685	0.57383	-1.16784	1.03221e-05	-0.58588	0.0335225	0.230246	1	-0.137008	0.755718	-0.581956	0.140699	1
AFLA_017950	0.0253222	1	-0.0336055	1	0.911206	0.000175988	0.58503	0.0189306	-0.314592	0.12487	-0.190526	0.445338	0.0589277	1	0.326176	0.23803	-0.124066	0.856105	0.273589
AFLA_017960	-0.120887	0.638816	-0.141861	0.574625	0.74129	4.88007e-05	0.393181	0.0328327	0.544454	0.000482947	0.300739	0.0804532	0.020974	1	0.348109	0.0705172	0.243715	0.382408	0.826581
AFLA_017970	0.146832	0.592817	0.260973	0.280586	-0.165839	0.418778	0.0647342	0.828615	0.974049	3.55477e-07	0.749763	0.000149657	-0.114141	1	-0.230573	0.318409	0.224286	0.494844	0.0490081
AFLA_017980	-0.17539	0.404422	-0.22115	0.275793	-0.592376	0.000324547	-0.511833	0.00286557	0.290595	0.0370912	0.191104	0.242056	0.0457605	1	-0.0805429	0.74895	0.099491	0.809642	0.291773
AFLA_017990	0.42348	0.00317235	0.556451	0.000169409	1.50715	1.10552e-14	1.49583	5.59061e-14	0.725102	2.42726e-08	0.999571	3.16432e-10	-0.132971	0.99062	0.0113146	1	-0.274469	0.112423	0.0913625
AFLA_018000	-0.179403	0.167563	0.034355	0.897917	0.465055	4.20501e-05	0.211723	0.0657106	-0.097044	0.314882	-0.224587	0.0346579	-0.213758	0.620132	0.253332	0.0325746	0.127543	0.487626	0.000374766
AFLA_018010	0.0445521	0.898201	0.000138827	1	0.783443	1.27242e-06	0.890735	3.44101e-07	0.528832	7.81829e-05	0.667159	1.67159e-05	0.0444133	1	-0.107292	0.589884	-0.138327	0.62133	0.396108
AFLA_018020	0.513288	0.751997	0.966105	0.478811	1.02761	0.320052	0.442245	0.747141	1.62704	0.0579619	2.05508	0.0353359	-0.452817	1	0.585363	0.687187	-0.428048	0.902636	0.357504
AFLA_018030	1.77636e-15	1	-1.77636e-15	1	0.44775	0.0270881	0.44775	0.0393006	0	1	-1.77636e-15	1	3.55271e-15	1	2.66454e-15	1	1.77636e-15	1	1
AFLA_018040	0.137724	1	-1.45105	0.1919	2.05752	0.0220183	3.11844	0.00136781	4.12556	2.59443e-06	4.12556	1.86243e-05	1.58877	0.728598	-1.06092	0.335389	1.77636e-15	1	0.907645
AFLA_018050	-0.398354	0.000629424	-0.546405	8.66761e-06	0.635492	5.0559e-08	0.639075	1.37422e-07	0.176192	0.0410219	0.299197	0.00267895	0.148051	0.856008	-0.00358323	1	-0.123005	0.462319	0.272235
AFLA_018060	-0.92645	0.589526	-0.808835	0.663039	2.85262	0.0163863	1.99834	0.122581	1.69828	0.103481	1.46134	0.229016	-0.117615	1	0.854282	0.60433	0.236937	1	0.583892
AFLA_018070	0.659134	0.162576	0.546899	0.267733	1.74242	2.733e-05	1.13361	0.00646218	0.181708	0.636547	0.867801	0.024862	0.112235	1	0.60881	0.177317	-0.686092	0.235651	0.734167
AFLA_018080	-0.384012	0.0127293	-0.418592	0.00692048	0.0345793	0.863307	-0.0397165	0.860454	-0.375376	0.00155467	-0.401456	0.00275235	0.0345799	1	0.0742958	0.712127	0.0260804	1	0.654026
AFLA_018090	-0.0229313	0.953589	-0.00396371	1	0.843125	1.80492e-10	0.53421	5.29381e-06	-0.20388	0.0212092	-0.0213389	0.892675	-0.0189675	1	0.308915	0.00583686	-0.182542	0.223445	0.834691
AFLA_018100	0.616014	0.0144496	0.548649	0.03113	0.196331	0.400764	0.704182	0.00258799	1.37837	4.77194e-09	1.80313	1.78686e-10	0.0673647	1	-0.507851	0.035004	-0.42476	0.176952	0.403495
AFLA_018110	-1.05706	6.80021e-09	-1.03847	1.01345e-08	-1.11317	1.28808e-10	-1.01464	3.8576e-09	-1.34436	4.50633e-14	-1.55344	2.80248e-14	-0.0185874	1	-0.0985367	0.587163	0.209076	0.307211	5.39835e-05
AFLA_018120	0.0689446	0.651914	-0.0773828	0.610846	0.0892576	0.413954	0.310659	0.00423055	-0.0854049	0.354382	0.200695	0.0463078	0.146327	0.87447	-0.221402	0.0491333	-0.2861	0.0345458	0.342234
AFLA_018130	-0.518031	2.24382e-05	-0.358937	0.00215392	-0.842081	1.33437e-10	-0.86306	2.75886e-10	-0.627624	5.93715e-09	-0.482494	8.33291e-06	-0.159094	0.811583	0.0209791	0.947709	-0.14513	0.365628	0.587411
AFLA_018140	0.480608	0.000815454	0.589844	6.67963e-05	1.65555	6.33434e-16	1.26822	3.07074e-12	-0.0508123	0.679845	0.103665	0.424504	-0.109236	1	0.387324	0.00415411	-0.154478	0.451972	0.482365
AFLA_018150	0.606802	0.0270091	0.567953	0.0408248	-0.410438	0.0834776	0.0300372	0.98204	-0.365727	0.07622	-0.482781	0.0395263	0.0388497	1	-0.440476	0.0978926	0.117054	0.874701	8.92278e-11
AFLA_018160	-0.241289	0.135315	-0.179942	0.294783	0.258222	0.0546086	0.0736607	0.677271	-0.202651	0.0844018	-0.0220995	0.929492	-0.0613468	1	0.184561	0.246493	-0.180551	0.412164	0.0687329
AFLA_018170	0.818716	0.00165871	0.671593	0.00959073	-1.02417	1.83937e-05	0.0239026	0.995661	-0.817317	7.529e-05	-0.487773	0.0275236	0.147123	1	-1.04808	4.89359e-05	-0.329543	0.354208	0.410813
AFLA_018180	-0.180557	0.998156	-0.204051	0.986656	0.592727	0.658844	0.122693	0.995162	-0.777843	0.463485	0.899578	0.459944	0.0234939	1	0.470034	0.808707	-1.67742	0.354846	0.207434
AFLA_018190	0.485864	0.730015	-0.501184	0.731985	1.17635	0.189063	0.793115	0.443226	0.535168	0.519003	-1.15923	0.191123	0.987048	0.976531	0.383237	0.792821	1.6944	0.181645	1.29439e-05
AFLA_018200	-0.22471	0.547513	-0.328179	0.341544	0.171977	0.569374	-0.238357	0.448927	-0.755627	0.00143362	-0.287886	0.293257	0.103469	1	0.410334	0.183755	-0.467741	0.235651	0.0370991
AFLA_018210	-0.622686	0.0010181	-0.225673	0.270511	-0.524164	0.00138305	-0.436961	0.0112467	-0.0321615	0.876724	-0.14065	0.410972	-0.397013	0.403605	-0.0872026	0.724746	0.108489	0.781809	0.341728
AFLA_018220	-0.771036	0.00118631	-1.00357	4.78934e-05	-0.46007	0.0230658	-0.599058	0.00580385	0.47122	0.00817912	0.681528	0.000963898	0.232535	0.966904	0.138988	0.626545	-0.210308	0.574532	0.000420804
AFLA_018230	-2.88433	2.17593e-05	-2.7449	4.83455e-05	-2.75554	5.5761e-06	-2.86447	7.55419e-06	3.30643	1.82945e-08	3.12314	6.1454e-07	-0.139435	1	0.108922	0.957481	0.183288	0.950026	0.0001132
AFLA_018240	-2.57845	8.43785e-07	-2.36512	4.05429e-06	-2.81313	1.25527e-08	-3.45675	4.55582e-10	0.182454	0.654346	-0.749695	0.0657763	-0.213329	1	0.643619	0.174234	0.932149	0.10097	0.808637
AFLA_018250	-0.0534942	0.898186	-0.013866	1	0.0785717	0.710303	0.308667	0.100235	0.448051	0.00350212	0.429076	0.0129936	-0.0396283	1	-0.230096	0.26633	0.0189744	1	0.147563
AFLA_018260	-0.119413	0.803125	-0.128397	0.791477	1.03916	0.000200141	0.637581	0.0264749	0.146387	0.571919	-0.149765	0.622609	0.00898438	1	0.401581	0.202916	0.296152	0.541448	0.892384
AFLA_018270	-0.125218	0.878514	-0.224455	0.71301	0.0884406	0.881047	0.387154	0.366879	0.213039	0.548283	0.106091	0.833464	0.0992376	1	-0.298713	0.549477	0.106948	0.971756	0.423175
AFLA_018280	0.149479	0.568876	0.00585195	1	0.510614	0.00572454	0.17951	0.403758	0.293237	0.0681941	0.0410429	0.882716	0.143627	1	0.331104	0.112157	0.252194	0.401243	0.862944
AFLA_018290	0.601151	0.0552937	0.425375	0.198997	0.269727	0.340021	0.341939	0.254217	1.25502	1.73814e-06	1.14825	4.82464e-05	0.175776	1	-0.0722118	0.90794	0.106768	0.918337	0.0382639
AFLA_018300	-0.252209	0.151129	-0.234585	0.191419	-0.905203	9.64825e-08	-0.113746	0.518573	-0.329346	0.0098221	-0.391367	0.00709205	-0.0176246	1	-0.791457	5.36756e-06	0.0620215	0.906996	0.733725
AFLA_018310	-0.139782	0.445118	-0.0566808	0.832052	1.04091	1.37335e-09	0.879733	1.49369e-07	0.22236	0.0625236	0.701666	3.08095e-06	-0.0831015	1	0.161178	0.334969	-0.479306	0.00730109	0.254066
AFLA_018320	-0.226996	0.326952	-0.445995	0.0359788	0.085658	0.695486	-0.148461	0.496242	0.238822	0.13364	-0.118791	0.552226	0.218999	0.946715	0.234119	0.281705	0.357613	0.172971	0.546845
AFLA_018330	-1.1572	0.135062	-0.948804	0.240221	-0.63633	0.350847	-0.618962	0.411282	-0.519308	0.377718	-1.17135	0.0679094	-0.208396	1	-0.0173684	1	0.652044	0.587072	0.0319658
AFLA_018340	-0.734409	5.912e-06	-0.719038	8.84114e-06	-0.0430862	0.806365	0.0525236	0.781304	-0.0450708	0.74293	-0.187603	0.153464	-0.0153702	1	-0.0956098	0.594964	0.142532	0.545297	0.508869
AFLA_018350	1.88677	0.00387407	2.0612	0.00176127	1.23423	0.0278105	0.593977	0.359882	0.0219538	1	-0.279783	0.666848	-0.174432	1	0.640256	0.356114	0.301737	0.853059	0.866856
AFLA_018360	1.19018	0.0106986	1.16796	0.0126832	-0.207851	0.662675	-0.0245658	1	0.54929	0.119509	0.742094	0.0641333	0.0222195	1	-0.183285	0.781665	-0.192804	0.88318	0.208672
AFLA_018370	-0.214702	0.339717	-0.169976	0.485997	-0.30091	0.0874378	-0.139874	0.508517	0.319734	0.0364526	0.181634	0.316814	-0.0447257	1	-0.161036	0.478614	0.1381	0.719616	0.131963
AFLA_018380	0.0915032	0.558365	0.258023	0.0474657	0.201347	0.0688228	0.0482134	0.757316	-0.397382	9.71023e-05	-0.335352	0.00259498	-0.16652	0.849845	0.153134	0.241785	-0.0620299	0.839779	0.569114
AFLA_018390	0.0656492	0.922837	-0.0447393	0.983313	0.462583	0.0554954	0.72599	0.00496467	0.141625	0.537951	0.513299	0.032302	0.110388	1	-0.263406	0.380794	-0.371673	0.32709	0.583106
AFLA_018400	-0.324643	0.169186	-0.168791	0.547769	-0.17782	0.394192	-0.00634736	1	0.131224	0.470705	0.11793	0.585996	-0.155851	1	-0.171473	0.502176	0.0132943	1	1
AFLA_018410	0.411138	0.0379303	0.373783	0.0631221	0.166796	0.354641	0.568325	0.00191778	0.611611	9.63971e-05	0.725176	5.17407e-05	0.0373555	1	-0.401529	0.0327323	-0.113565	0.784051	6.39798e-09
AFLA_018420	0.464565	0.0358561	0.18926	0.470908	0.677052	0.00051601	0.649469	0.00155445	0.862013	3.051e-06	1.01325	1.59328e-06	0.275305	0.874232	0.027583	0.987695	-0.151235	0.716481	0.513113
AFLA_018430	-0.950076	0.510846	1.06592	0.458578	-0.235124	0.891599	-0.231369	0.916489	2.35431	0.0103131	0.224389	0.889685	-2.016	0.653504	-0.00375538	1	2.12992	0.156798	0.0706277
AFLA_018440	-0.157531	0.398324	-0.160933	0.394083	0.259719	0.0678159	0.664416	3.36913e-05	0.30369	0.0143894	0.396781	0.00526448	0.00340153	1	-0.404697	0.00976583	-0.0930912	0.790366	0.254142
AFLA_018450	3.28358	5.31641e-17	2.41791	2.11559e-13	1.59143	3.67828e-10	1.50814	4.32427e-09	1.67338	5.12026e-12	1.47777	1.79196e-09	0.865668	0.0194965	0.0832989	0.803503	0.195607	0.598914	0.524956
AFLA_018460	3.30275	1.37592e-07	2.33256	5.53232e-05	2.41807	3.81936e-06	2.95844	2.96164e-07	2.62276	8.9461e-08	2.74871	3.81528e-07	0.970194	0.598332	-0.540365	0.357738	-0.125946	0.980298	0.924981
AFLA_018470	4.53046	9.22871e-12	2.16047	3.40652e-05	2.60629	1.39561e-07	2.78979	1.09126e-07	1.81876	8.42964e-06	2.66183	8.48731e-08	2.36999	0.00161085	-0.183505	0.798895	-0.843062	0.171851	0.00830013
AFLA_018480	-0.141501	0.260821	-0.0358812	0.87198	0.393045	0.000167248	0.165012	0.131185	-0.0915278	0.311495	-0.0463615	0.693574	-0.10562	0.99659	0.228034	0.040612	-0.0451664	0.896246	1
AFLA_018490	0.885705	3.59142e-07	0.596349	0.000202703	0.958608	5.60437e-09	0.683412	9.23809e-06	0.527823	2.84074e-05	0.997844	2.15756e-09	0.289356	0.536783	0.275195	0.0660738	-0.470021	0.00731269	0.00830013
AFLA_018500	0.148004	0.643451	0.129939	0.709928	0.158498	0.50159	0.105454	0.71569	0.156351	0.42898	-0.012989	1	0.0180648	1	0.0530444	0.921851	0.16934	0.71772	0.907394
AFLA_018510	0.735837	0.0254271	0.528615	0.122118	1.50318	1.85601e-06	1.10714	0.000365151	1.85479	2.39974e-09	1.92229	1.56786e-08	0.207222	1	0.396044	0.237832	-0.0674995	0.989688	0.198765
AFLA_018520	0.0229996	0.911197	0.0746621	0.505763	0.491877	1.12607e-07	0.545459	4.39794e-08	0.143182	0.0392812	0.441989	7.79531e-07	-0.0516625	1	-0.0535825	0.634506	-0.298807	0.00393169	0.00274253
AFLA_018530	-0.603004	0.000252996	-0.480807	0.00298315	-0.417108	0.00285995	-0.31934	0.0310408	-0.24856	0.0397976	-0.210714	0.130281	-0.122197	1	-0.097768	0.612974	-0.0378465	0.976844	0.0280928
AFLA_018540	-0.147138	0.254449	-0.09984	0.488017	-0.0735566	0.522939	0.0603805	0.65239	0.176532	0.0498969	0.130168	0.215328	-0.0472985	1	-0.133937	0.279191	0.0463641	0.896559	0.895428
AFLA_018550	-0.926794	0.00370587	-0.580972	0.0756933	-1.33426	7.94158e-06	-0.639221	0.0295377	-1.20754	5.21239e-06	-0.70476	0.010154	-0.345823	0.936608	-0.695041	0.0220241	-0.50278	0.213945	0.357348
AFLA_018560	-0.550997	0.0259807	-0.435222	0.0869872	-0.243628	0.271964	-0.128371	0.640242	-0.201087	0.293256	-0.0205675	0.980836	-0.115776	1	-0.115257	0.723905	-0.18052	0.687823	0.361568
AFLA_018570	1.77636e-15	1	-1.77636e-15	1	3.55271e-15	1	8.88178e-16	1	0	1	-1.77636e-15	1	3.55271e-15	1	2.66454e-15	1	1.77636e-15	1	1
AFLA_018580	1.77636e-15	1	-1.77636e-15	1	3.55271e-15	1	8.88178e-16	1	0	1	-1.77636e-15	1	3.55271e-15	1	2.66454e-15	1	1.77636e-15	1	0.820342
AFLA_018590	0.363653	0.368788	0.128264	0.834229	1.25516	0.000116886	0.401547	0.249812	1.34533	6.90502e-06	0.832882	0.00746781	0.235389	1	0.85361	0.0128513	0.512446	0.282065	0.668554
AFLA_018600	-0.276288	0.587358	-0.324116	0.518826	1.33951	0.000250248	0.970115	0.0101223	1.63641	2.16211e-06	0.545014	0.124435	0.047829	1	0.369396	0.405049	1.09139	0.0195784	0.0833041
AFLA_018610	-1.47625	0.0010411	-0.812646	0.0747658	-1.44869	0.000261053	-0.835619	0.0417397	0.595355	0.0756567	1.55831	0.000101897	-0.663602	0.744645	-0.613072	0.165681	-0.962955	0.0674353	0.924035
AFLA_018620	-1.2804	0.31573	-0.215321	0.966832	-0.634356	0.579558	-1.7422	0.109202	-1.73825	0.0468529	-0.131279	0.953826	-1.06508	0.993916	1.10784	0.372979	-1.60697	0.299879	1
AFLA_018630	-1.41603	0.0916655	-1.51863	0.0709429	-0.000563864	1	0.00622006	1	0.124761	0.898741	1.16732	0.099435	0.102598	1	-0.00678392	1	-1.04256	0.357087	1
AFLA_018640	-0.943337	0.0594164	-1.78501	0.000421459	0.290118	0.54573	0.000809027	1	-0.0857203	0.87535	0.347806	0.445338	0.841675	0.628318	0.289309	0.630757	-0.433526	0.585188	3.14766e-05
AFLA_018650	-5.03221	8.8354e-06	-3.06446	0.00409738	-1.11048	0.241035	-2.78048	0.00455233	-4.18753	2.64211e-06	-2.61567	0.00438267	-1.96776	0.539027	1.67	0.106198	-1.57185	0.2518	0.226479
AFLA_018660	-0.464147	0.294345	-0.143315	0.835599	-0.177671	0.66909	0.125692	0.815165	0.139456	0.695537	0.411873	0.250104	-0.320832	1	-0.303364	0.511115	-0.272417	0.724241	2.18459e-07
AFLA_018670	-0.486499	0.0152555	-0.298083	0.158104	0.0942854	0.642142	0.408814	0.0268691	0.396811	0.00893583	0.541353	0.00195716	-0.188416	0.987666	-0.314528	0.107372	-0.144542	0.694377	0.185316
AFLA_018680	1.1423	0.237751	1.1423	0.242779	2.37482	0.00252964	2.25848	0.00668011	4.29817	8.53204e-08	4.76551	1.23941e-07	3.55271e-15	1	0.116331	0.985598	-0.467345	0.818329	0.432208
AFLA_018690	0.461934	0.809019	0.461934	0.81832	0.0848192	1	-0.0770759	1	0.78398	0.425065	1.46757	0.171605	2.66454e-15	1	0.161895	0.984789	-0.683593	0.797057	0.820342
AFLA_018700	0.00682987	1	0.156981	0.679077	0.703565	0.0035242	0.33306	0.20948	0.628235	0.00304399	0.1197	0.664979	-0.150151	1	0.370505	0.182798	0.508535	0.134367	0.119683
AFLA_018710	-0.274935	0.323163	-1.14408	1.95887e-05	-2.12829	3.66923e-12	-1.40559	1.43247e-07	-1.37241	5.59247e-09	-1.30978	1.76339e-07	0.869144	0.0442439	-0.722706	0.00278709	-0.0626244	0.972099	0.421872
AFLA_018720	-0.661553	0.173258	-1.7349	0.000269039	-2.65378	2.57311e-08	-1.73863	9.25125e-05	-1.36153	0.000194325	-0.91736	0.0208676	1.07334	0.309035	-0.915151	0.0388934	-0.444168	0.53513	0.729094
AFLA_018730	0.816734	0.000147333	0.879528	5.67889e-05	-0.235179	0.202971	0.0447492	0.897367	0.896969	5.8895e-07	1.01256	6.06518e-07	-0.0627945	1	-0.279928	0.180055	-0.115591	0.797915	0.00551069
AFLA_018740	-1.2009	0.0207419	-0.960965	0.0706736	0.749803	0.0963911	1.63765	0.000767569	-0.901857	0.0210173	-1.04952	0.0184191	-0.239935	1	-0.887851	0.0761669	0.147667	0.950072	0.131232
AFLA_018750	-0.848165	0.325799	-0.487093	0.637805	-0.549123	0.456847	0.703318	0.367867	-0.713594	0.235872	-0.793784	0.251307	-0.361072	1	-1.25244	0.100464	0.0801904	1	0.820342
AFLA_018760	-0.266207	0.245464	-0.21663	0.370333	0.307243	0.0971655	-0.0251194	0.975567	-0.796649	6.52024e-06	-0.653138	0.000526874	-0.0495768	1	0.332362	0.109973	-0.143511	0.724241	0.154532
AFLA_018770	-0.475263	1.30337e-05	-0.395434	0.000190176	-0.281034	0.00173176	-0.421358	2.65142e-05	0.0135592	0.919022	-0.281618	0.00166947	-0.0798284	1	0.140324	0.170405	0.295177	0.0108485	0.980822
AFLA_018780	-0.700368	0.142256	-0.721249	0.132366	-0.693974	0.0807996	-1.06395	0.011835	1.40658	0.000115045	1.69358	5.04568e-05	0.0208816	1	0.369979	0.469003	-0.286997	0.75533	0.308327
AFLA_018790	1.99531	0.0157996	0.52944	0.624014	-3.32227	1.50279e-05	-3.07597	0.000105213	1.37213	0.0274547	0.809021	0.270013	1.46587	0.585718	-0.246297	0.856308	0.563104	0.719484	0.00862524
AFLA_018800	-0.655545	0.313277	-0.305152	0.717197	-2.38947	1.41645e-05	-1.87528	0.000740565	-0.309412	0.523565	-0.945623	0.0631033	-0.350393	1	-0.51419	0.427746	0.636211	0.461784	0.006309
AFLA_018810	1.0116	0.199146	0.869061	0.288793	-2.09899	0.00130168	-1.59395	0.020027	-0.11086	0.901874	-0.587407	0.385207	0.142539	1	-0.505034	0.561171	0.476547	0.744331	0.000228646
AFLA_018820	0.296421	0.323926	0.543169	0.05059	1.15575	6.59759e-06	1.02563	9.13418e-05	1.44301	9.90435e-09	1.37999	2.82957e-07	-0.246748	0.997216	0.130116	0.715613	0.063017	0.978871	0.606014
AFLA_018830	-0.511414	0.0597049	-0.414481	0.140044	0.392995	0.0916062	0.259218	0.32795	-0.545784	0.00729607	-0.5516	0.016617	-0.0969326	1	0.133777	0.699801	0.00581634	1	1
AFLA_018840	-0.28687	0.170169	-0.169733	0.476594	0.192398	0.2837	0.0571057	0.835742	-0.374672	0.0128688	-0.496396	0.00407641	-0.117137	1	0.135292	0.561337	0.121724	0.763936	9.56059e-07
AFLA_018850	-0.326591	0.122742	-0.252337	0.257747	0.277429	0.120371	0.297165	0.121769	0.294018	0.0564748	0.285779	0.106302	-0.074254	1	-0.019736	1	0.00823914	1	0.829662
AFLA_018860	-0.207856	0.10937	0.132847	0.348679	-0.207965	0.0561809	-0.24146	0.0380647	-0.402601	6.71498e-05	-0.336553	0.00218878	-0.340703	0.174163	0.0334944	0.882572	-0.0660478	0.814733	0.126364
AFLA_018870	0.133015	0.726724	-0.0964439	0.837339	0.0814939	0.796145	0.0269579	0.991367	-0.342743	0.0985872	-0.235169	0.341294	0.229459	1	0.054536	0.933351	-0.107574	0.894881	0.273131
AFLA_018880	0.0662156	0.69085	0.159744	0.234375	0.231978	0.0300498	0.452097	0.000141315	0.0315197	0.789412	0.0749738	0.521947	-0.093528	1	-0.220119	0.0657482	-0.043454	0.91542	1
AFLA_018890	-4.57416	5.36424e-08	-4.11018	4.48058e-07	4.20949	2.2757e-08	3.79088	5.37885e-07	0.414002	0.483677	1.8884	0.00290641	-0.463977	1	0.418614	0.640044	-1.4744	0.0912744	0.111595
AFLA_018900	-0.871574	0.23728	-1.58481	0.0222284	-0.381004	0.573352	-0.461471	0.521543	0.334343	0.556142	0.334343	0.618064	0.713237	0.94756	0.0804668	0.993574	1.77636e-15	1	1
AFLA_018910	1.23677	0.188454	0.849486	0.410273	-0.160854	0.904478	0.366966	0.728066	2.4449	0.000449744	2.20926	0.00421795	0.387285	1	-0.52782	0.625653	0.235632	0.961527	2.41581e-06
AFLA_018920	0.681591	0.6983	-0.515946	0.803316	2.47771	0.0274631	2.89974	0.0158642	1.49479	0.130784	1.96213	0.0808708	1.19754	0.993916	-0.422029	0.836415	-0.467345	0.911273	0.6408
AFLA_018930	0.215696	0.209153	0.249522	0.140863	0.847568	1.56144e-07	0.554771	0.000295442	-0.179301	0.144115	-0.169882	0.233261	-0.0338256	1	0.292797	0.0595628	-0.00941891	1	0.752328
AFLA_018940	0.375865	0.070458	0.506821	0.0136624	0.797411	2.38413e-05	0.403632	0.032342	0.598378	0.000208361	0.667999	0.000251581	-0.130956	1	0.393779	0.0445832	-0.069621	0.921286	0.000456579
AFLA_018950	0.0775312	0.867214	0.0672225	0.907894	0.630037	0.00432905	0.232379	0.358851	-0.883868	2.0308e-05	-0.636921	0.00388633	0.0103087	1	0.397657	0.109256	-0.246947	0.528465	0.0015464
AFLA_018960	-0.0149296	1	-0.089333	0.806924	0.533623	0.0070416	0.394271	0.0630773	0.601807	0.000710764	0.607471	0.00230537	0.0744034	1	0.139351	0.61289	-0.00566327	1	0.506073
AFLA_018970	0.180115	0.370869	-0.0123862	1	0.856401	8.92375e-07	0.655693	0.000134047	0.387635	0.00455619	0.123025	0.458641	0.192501	0.941629	0.200708	0.279951	0.26461	0.255908	1.51125e-06
AFLA_018980	-0.405508	0.556083	-0.277182	0.734422	-0.201178	0.740007	0.295645	0.637688	0.43579	0.321809	0.921217	0.05739	-0.128326	1	-0.496823	0.420932	-0.485427	0.597342	0.314692
AFLA_018990	0.149327	0.285626	0.0669251	0.71301	-0.345463	0.00205717	-0.565412	8.90565e-06	-0.262909	0.00694328	-0.325757	0.00343781	0.0824018	1	0.219949	0.0757364	0.0628476	0.835686	0.627087
AFLA_019000	3.3513	1.05592e-11	2.56847	5.50075e-09	2.88005	2.25463e-11	2.78896	1.81678e-10	1.3197	1.23702e-05	1.94758	1.17877e-07	0.782829	0.403337	0.0910894	0.897191	-0.627879	0.171377	0.21659
AFLA_019010	-0.080954	0.893665	0.227855	0.53759	0.181702	0.527859	-0.38174	0.178226	-0.17202	0.475874	-0.3804	0.142408	-0.308809	0.948084	0.563442	0.0489029	0.20838	0.709915	1
AFLA_019020	0.287828	0.238548	0.212522	0.422456	0.57308	0.00375755	0.3359	0.115252	-1.34648	8.47619e-10	-1.3377	1.44383e-08	0.0753065	1	0.23718	0.321204	-0.00877525	1	7.80447e-05
AFLA_019030	0.440674	0.331888	0.325612	0.517979	1.53513	4.41134e-05	2.01543	1.50422e-06	0.685214	0.026799	1.1703	0.00115343	0.115062	1	-0.480299	0.254768	-0.485091	0.401512	0.441178
AFLA_019040	0.993167	2.06059e-05	0.792146	0.000453806	0.918718	8.81631e-06	1.33129	2.94632e-08	0.644714	0.000213188	0.639749	0.000966512	0.201021	0.995729	-0.412567	0.0514335	0.00496544	1	0.813228
AFLA_019050	0.516871	0.00290292	0.558571	0.00142128	-0.129722	0.420806	0.388603	0.0146932	0.447377	0.000845348	0.414535	0.00555033	-0.0416999	1	-0.518325	0.00178977	0.0328422	0.998084	5.25815e-05
AFLA_019060	-0.483217	0.0668493	-0.444077	0.0981719	-0.298396	0.194322	-0.264901	0.297619	0.424076	0.030267	0.308518	0.173846	-0.0391399	1	-0.0334947	0.985598	0.115557	0.865105	1
AFLA_019070	0.408839	0.682253	-0.934039	0.253706	-1.00271	0.126954	-0.672554	0.369938	0.277495	0.670588	0.0735164	0.967054	1.34288	0.578922	-0.330153	0.745872	0.203978	0.957864	0.758234
AFLA_019080	-0.663702	0.527973	-8.88178e-16	1	-0.761692	0.340681	0	1	-1.3082	0.0474906	0.0644812	0.990434	-0.663702	1	-0.761692	0.427654	-1.37268	0.218811	0.27374
AFLA_019090	-0.442815	0.187263	-0.648156	0.04525	-1.88699	1.29446e-08	-1.73191	2.24156e-07	-0.291953	0.232775	-0.242267	0.404619	0.205341	1	-0.155081	0.708648	-0.0496851	1	0.0536243
AFLA_019100	2.21971	2.11699e-14	1.41358	1.54876e-09	-0.780539	1.20678e-05	0.119358	0.556664	0.582934	0.000124749	0.123842	0.488008	0.806132	0.00727117	-0.899897	5.28724e-06	0.459092	0.0380621	0.0058914
AFLA_019110	-0.011332	1	-0.602736	0.0421201	-0.570704	0.0231894	-0.362937	0.191804	-0.482445	0.0282005	0.195216	0.470996	0.591404	0.448868	-0.207767	0.53689	-0.677661	0.0464964	0.172794
AFLA_019120	3.68128	0.000118162	1.85383	0.0488105	-0.0713804	0.998329	-0.53964	0.588984	-1.73156	0.0131037	-0.882021	0.283105	1.82745	0.47529	0.46826	0.692989	-0.849538	0.55955	2.38788e-07
AFLA_019130	-0.331739	0.0735357	-0.444867	0.0152183	0.218108	0.174862	0.95912	4.23524e-07	-1.70582	8.76135e-15	-1.12929	4.6824e-09	0.113129	1	-0.741012	4.84669e-05	-0.576525	0.00487699	0.0135369
AFLA_019140	-0.661863	0.324235	-0.370229	0.647338	-0.901575	0.0882061	-0.58907	0.327859	0.223651	0.672484	-0.0654269	0.958527	-0.291634	1	-0.312504	0.687893	0.289078	0.84556	0.00651363
AFLA_019150	-1.44089	0.0467651	-1.05107	0.165851	-1.22495	0.0477332	-1.02888	0.126941	0.275326	0.655707	-0.00998866	1	-0.389821	1	-0.196073	0.876315	0.285315	0.891763	1
AFLA_019160	-1.34448	0.383545	-2.23812	0.116011	2.09828	0.0769319	2.44805	0.053573	1.09998	0.301033	0.989459	0.432365	0.893645	1	-0.349776	0.891556	0.110525	1	0.638639
AFLA_019170	-0.535791	0.77433	-0.145984	1	-0.50919	0.701244	-0.350856	0.844395	-0.0188636	1	-0.663736	0.587174	-0.389807	1	-0.158333	0.988199	0.644872	0.824092	0.42152
AFLA_019180	-1.37289	0.0235467	-1.24355	0.0431536	-1.24429	0.0170141	-1.09607	0.0502565	-3.07977	2.23431e-08	-3.11949	1.9924e-07	-0.129349	1	-0.148216	0.898933	0.0397178	1	1
AFLA_019190	-4.14199	1.15278e-09	-4.6861	6.46176e-11	0.339753	0.524348	-0.899275	0.0810862	-4.02702	6.25949e-12	-4.6451	3.98643e-12	0.544111	0.970913	1.23903	0.0185748	0.618079	0.437557	0.233182
AFLA_019200	0.343189	0.0195452	0.16888	0.297927	-0.176344	0.173023	0.285271	0.0352351	1.11667	1.98054e-12	1.11824	4.15812e-11	0.174308	0.89629	-0.461615	0.00108284	-0.00157052	1	0.0197111
AFLA_019210	-1.63292	0.0661897	0.186728	0.94901	-1.85683	0.0140685	-1.08402	0.194352	-0.326727	0.666468	-0.27291	0.773612	-1.81965	0.423426	-0.77281	0.419989	-0.0538178	1	1
AFLA_019220	-1.89031	0.017523	-1.48958	0.0673302	-1.3218	0.0542325	-1.10391	0.140634	-0.710328	0.246024	-0.466374	0.535292	-0.400737	1	-0.217886	0.87582	-0.243953	0.938994	0.176625
AFLA_019230	-1.85475	4.68398e-05	-1.59141	0.000370233	2.08921	8.16913e-07	0.97783	0.0147946	-1.2715	0.000214596	-0.0936583	0.862479	-0.263342	1	1.11138	0.00738442	-1.17784	0.0174971	0.440977
AFLA_019240	-2.59267	2.82148e-09	-2.83328	3.69543e-10	-1.83692	2.65708e-07	-1.38616	6.76074e-05	-0.148313	0.627873	-0.308162	0.341959	0.240613	1	-0.45076	0.218619	0.159849	0.865269	0.137983
AFLA_019250	-3.07281	1.48409e-06	-3.23181	6.01366e-07	-1.93058	0.000214647	-1.38363	0.00996139	-1.05555	0.0162913	-0.83863	0.0954075	0.158999	1	-0.546941	0.38262	-0.216924	0.904703	0.0209888
AFLA_019260	1.71438	0.0840886	0.398588	0.792651	-0.871506	0.323188	-0.549116	0.60342	-0.239396	0.797308	1.71743	0.0393428	1.3158	0.822313	-0.32239	0.830232	-1.95683	0.0928935	0.00223754
AFLA_019270	0.108582	0.826411	0.6658	0.0318187	-0.0152819	1	0.763104	0.00701785	-0.174962	0.481044	-0.409574	0.123232	-0.557217	0.561991	-0.778386	0.00769953	0.234612	0.663409	9.27593e-08
AFLA_019280	-0.168055	0.255805	-0.366571	0.00772446	-0.159732	0.186643	0.0927611	0.516808	-0.0496157	0.676773	-0.0907689	0.475513	0.198516	0.770208	-0.252493	0.0546356	0.0411532	0.941969	1.06766e-05
AFLA_019290	2.66454e-15	1	-8.88178e-16	1	-0.498329	0.551095	-0.630745	0.477726	4.20864	4.8001e-08	3.36918	2.08323e-05	3.55271e-15	1	0.132416	0.968588	0.839457	0.522334	0.546845
AFLA_019300	-0.246339	0.591762	-0.419573	0.304577	-0.421684	0.196446	-0.612784	0.0737182	0.245184	0.402566	0.331946	0.313663	0.173234	1	0.1911	0.683693	-0.0867615	0.977029	0.317472
AFLA_019310	-2.61506	7.7833e-09	-1.94546	2.67306e-06	1.17378	0.000502805	1.09162	0.00205269	-0.158758	0.622713	-0.0784379	0.87066	-0.669608	0.598303	0.0821643	0.921528	-0.0803198	0.988408	0.0285369
AFLA_019320	-1.2975	0.0143101	-1.23333	0.0207947	-0.0384824	1	0.71187	0.155011	0.381715	0.35917	1.0041	0.0270211	-0.0641686	1	-0.750352	0.152239	-0.622381	0.404294	0.820342
AFLA_019330	-1.68071	0.141031	-0.944147	0.470765	1.16893	0.232532	0.470508	0.714285	-0.429652	0.648055	-0.447649	0.685487	-0.736567	1	0.698427	0.593363	0.0179973	1	0.820342
AFLA_019340	-4.55161	1.25521e-08	-3.64563	1.06596e-06	-2.55035	4.00449e-05	-1.46067	0.0192634	-3.75939	3.58288e-09	-3.44406	2.61489e-07	-0.905985	0.83069	-1.08968	0.098298	-0.315337	0.851664	1
AFLA_019350	-4.0788	6.2199e-05	-4.00407	8.47822e-05	-1.39122	0.101701	-1.31969	0.152925	-2.49024	0.000983431	-2.91476	0.000708552	-0.0747376	1	-0.07153	1	0.424519	0.869529	0.872543
AFLA_019360	1.77636e-15	1	-1.77636e-15	1	3.55271e-15	1	8.88178e-16	1	0	1	-1.77636e-15	1	3.55271e-15	1	2.66454e-15	1	1.77636e-15	1	1
AFLA_019370	1.77636e-15	1	-1.77636e-15	1	3.55271e-15	1	8.88178e-16	1	0.368253	0.383037	-0.467493	0.328877	3.55271e-15	1	2.66454e-15	1	0.835745	0.218922	0.583211
AFLA_019380	2.66454e-15	1	0	1	-0.923956	0.260877	-1.33992	0.118861	-0.934771	0.181652	-1.46045	0.0637294	2.66454e-15	1	0.415964	0.734622	0.525678	0.785996	1
AFLA_019390	2.66454e-15	1	-0.649843	0.448873	-0.984924	0.120407	0	1	8.88178e-16	1	-1.4591	0.0193389	0.649843	0.997216	-0.984924	0.175357	1.4591	0.0933753	0.315831
AFLA_019400	-1.20351	0.0198316	-1.77636e-15	1	3.55271e-15	1	-0.383237	0.471947	-8.88178e-16	1	-1.77636e-15	1	-1.20351	0.303886	0.383237	0.515223	8.88178e-16	1	1
AFLA_019410	1.77636e-15	1	-0.665952	0.446891	0.0979743	0.949007	-1.22598	0.0756121	-0.426968	0.476967	-1.77636e-15	1	0.665952	0.997216	1.32395	0.0639912	-0.426968	0.785297	1
AFLA_019420	-6.34034	2.00938e-10	-6.97982	1.94457e-11	-4.72078	9.97567e-09	-5.29424	2.82306e-09	-4.33213	4.16804e-09	-5.37912	5.10584e-10	0.639481	1	0.57346	0.524965	1.04699	0.325429	0.041101
AFLA_019430	-5.29055	2.17649e-14	-5.93403	8.46844e-16	-3.46368	4.91621e-11	-4.50517	2.63117e-13	-4.67203	7.91591e-16	-4.70493	1.92027e-14	0.643483	0.79184	1.04149	0.0163138	0.0329014	1	0.00017063
AFLA_019440	-3.2997	8.06102e-14	-3.59638	6.44456e-15	-2.68044	7.73285e-13	-2.487	1.99721e-11	-1.7198	1.59829e-09	-2.74374	4.05143e-13	0.296682	0.966394	-0.193447	0.585298	1.02394	0.00225231	1.08382e-07
AFLA_019450	-4.08865	4.12507e-07	-4.74486	2.12301e-08	-3.43377	9.76783e-07	-2.84706	4.88577e-05	-3.08473	6.91117e-07	-3.39922	1.09762e-06	0.656204	0.996917	-0.586711	0.465437	0.31449	0.869464	1
AFLA_019460	-2.20162	6.72131e-05	-2.83274	1.22315e-06	-4.25786	1.2481e-11	-3.67975	1.45494e-09	-4.15054	9.63527e-13	-4.45929	3.76786e-12	0.63112	0.895966	-0.578105	0.295317	0.308749	0.780473	0.307328
AFLA_019470	-0.642458	0.686305	-1.77636e-15	1	-1.09492	0.310212	-0.199881	0.935144	-0.105198	0.963694	-0.815941	0.459308	-0.642458	1	-0.895036	0.50936	0.710744	0.771991	0.0184503
AFLA_019480	0.50386	0.609462	0.50386	0.621306	-1.24917	0.0647175	-2.6211	0.000393203	8.88178e-16	1	-8.88178e-16	1	2.66454e-15	1	1.37193	0.068563	1.77636e-15	1	0.20129
AFLA_019490	-0.482278	0.0573953	-0.301576	0.272028	-0.567202	0.00884073	-0.765493	0.00109361	-1.32246	1.06008e-08	-1.51277	8.25779e-09	-0.180702	1	0.198291	0.480487	0.190307	0.666304	4.38214e-08
AFLA_019500	-1.03027	0.138514	0.505003	0.544135	0.572189	0.349824	0.110718	0.936794	0	1	-8.88178e-16	1	-1.53528	0.322031	0.461471	0.552897	8.88178e-16	1	0.0144534
AFLA_019510	-1.27855	0.0142408	-0.750444	0.174749	-4.83234	3.28557e-13	-5.82453	9.98228e-15	-5.9688	3.38199e-17	-5.56636	7.54349e-15	-0.528108	0.95697	0.992187	0.0470186	-0.402434	0.658423	0.458064
AFLA_019520	-1.43628	2.11613e-11	-1.87219	1.95126e-14	-0.414185	0.00330018	-0.829642	7.06797e-07	0.322385	0.00865088	0.251236	0.0717405	0.435909	0.174163	0.415457	0.00710796	0.071149	0.867059	0.294433
AFLA_019530	-0.192967	0.386767	-0.162914	0.495306	-0.242327	0.163845	0.0918324	0.68513	-0.745843	5.67124e-06	-0.723255	5.75397e-05	-0.0300532	1	-0.334159	0.080632	-0.0225874	1	0.00151522
AFLA_019540	5.04298	9.60111e-06	3.8675	0.00041026	0.294774	0.815404	0.228223	0.897857	-0.663643	0.438289	2.11048	0.0212659	1.17548	0.929632	0.0665518	1	-2.77412	0.0230012	0.0741009
AFLA_019550	4.47296	3.4354e-15	4.35411	6.08242e-15	1.59759	3.28462e-06	1.6548	4.74404e-06	0.27258	0.334235	1.08066	0.000688026	0.118856	1	-0.0572124	0.965476	-0.808083	0.056795	0.798943
AFLA_019560	3.09837	0.00836598	4.10521	0.000614822	1.10481	0.297758	1.22369	0.286291	1.53077	0.0845067	2.84189	0.00518391	-1.00684	1	-0.118885	1	-1.31112	0.43808	0.333535
AFLA_019570	2.66454e-15	1	-0.665952	0.612904	-0.50276	0.622342	-1.05609	0.286705	1.88347	0.0139942	1.59054	0.0686827	0.665952	1	0.553328	0.663217	0.292921	0.948577	9.39207e-05
AFLA_019580	-2.70751	0.00703664	-2.05927	0.0437513	-2.08219	0.016193	-0.944512	0.342694	-0.229931	0.816095	0.0485164	1	-0.648237	1	-1.13768	0.272883	-0.278447	0.954097	0.635799
AFLA_019590	-0.398071	0.775533	1.94774	0.0430594	-0.191227	0.884642	0.163127	0.931867	1.24677	0.0811977	1.44094	0.0773533	-2.34581	0.246473	-0.354354	0.796336	-0.194173	0.990183	0.111596
AFLA_019600	1.77636e-15	1	-1.77636e-15	1	3.55271e-15	1	8.88178e-16	1	-0.0911862	0.861829	0.368369	0.409123	3.55271e-15	1	2.66454e-15	1	-0.459555	0.547686	0.0193176
AFLA_019610	-0.0778362	0.946639	-1.11722	0.00365944	0.0189793	1	-0.40812	0.271682	-3.04926	5.58849e-13	-2.85547	6.37922e-11	1.03938	0.174163	0.427099	0.279653	-0.193788	0.824043	0.337231
AFLA_019620	-0.852932	0.00723678	-0.723287	0.023998	-1.02578	0.000292883	-0.78688	0.00727072	-1.92283	4.95082e-10	-2.51349	1.64816e-11	-0.129645	1	-0.238902	0.508686	0.590657	0.12729	0.743889
AFLA_019630	-0.593226	0.676501	-0.101532	1	-0.51965	0.63136	0.769136	0.490757	-5.35932	3.40142e-08	-4.96444	1.50199e-06	-0.491694	1	-1.28879	0.24079	-0.394877	0.907114	0.0104311
AFLA_019640	2.67923	4.47973e-07	2.26572	8.93115e-06	3.04096	2.56915e-09	1.53836	0.000595163	1.46561	0.000108961	1.4679	0.000494003	0.413513	1	1.5026	0.00103443	-0.00228887	1	1
AFLA_019650	-1.5788	6.73766e-09	-1.13819	4.07958e-06	1.03262	2.2446e-06	0.48308	0.021522	-0.670256	0.000198681	-0.222131	0.272792	-0.440612	0.496723	0.549541	0.0113792	-0.448126	0.101223	3.96611e-09
AFLA_019660	0.668567	0.00866268	0.384836	0.150902	1.55508	7.0583e-09	0.72797	0.00212789	-0.170174	0.400238	0.725678	0.00116031	0.283732	0.925903	0.827108	0.000768747	-0.895852	0.00175569	0.000129185
AFLA_019670	-3.7383	7.99851e-10	-4.37802	1.82535e-11	-0.491346	0.265932	-0.907359	0.0461017	-0.915654	0.0136855	-0.477057	0.274825	0.639712	0.850479	0.416014	0.44248	-0.438596	0.57646	0.0842997
AFLA_019680	0.562514	0.000927385	0.0374763	0.941003	0.342579	0.0175882	0.000442065	1	0.647703	3.7784e-06	0.505673	0.000625114	0.525038	0.0797808	0.342137	0.0325891	0.14203	0.605997	0.00594082
AFLA_019690	0.716787	0.00199798	0.548326	0.0180392	0.553372	0.00555319	0.991104	1.30129e-05	-0.100548	0.603697	-0.536611	0.00692224	0.168461	1	-0.437732	0.0472572	0.436063	0.117853	0.010812
AFLA_019700	-0.523037	0.0127293	-0.494465	0.0193795	0.212814	0.258143	0.0783488	0.760647	-0.286578	0.0701809	-0.415462	0.0211274	-0.0285714	1	0.134466	0.590108	0.128884	0.762449	0.106267
AFLA_019710	0.283636	0.166218	0.324491	0.10956	0.161834	0.367872	-0.127106	0.537065	-0.299859	0.041601	-0.216374	0.206885	-0.0408556	1	0.288939	0.132992	-0.0834851	0.875435	0.520992
AFLA_019720	0.0397026	0.917407	0.183829	0.312807	-0.0371035	0.861593	-0.0311693	0.917024	0.521337	7.16844e-05	0.465505	0.00120121	-0.144126	0.997589	-0.00593412	1	0.0558319	0.921326	7.101e-06
AFLA_019730	-0.227178	0.720802	0.478417	0.358052	0.0110766	1	0.450345	0.321845	0.774817	0.0257204	1.0825	0.00653991	-0.705595	0.724535	-0.439268	0.373747	-0.307679	0.726797	0.0516483
AFLA_019740	-0.818757	0.00719893	-0.570149	0.0676906	0.100297	0.765575	0.193535	0.548127	-1.47765	6.01954e-08	-1.07086	9.91385e-05	-0.248607	1	-0.0932376	0.850085	-0.406787	0.32357	0.000246446
AFLA_019750	-2.48105	0.0459542	-2.17832	0.0860171	-1.13054	0.310673	-1.61206	0.16717	0.513444	0.62282	-1.77825	0.0943971	-0.302729	1	0.481525	0.783178	2.29169	0.126928	0.176625
AFLA_019760	0.0588068	0.805892	0.100749	0.616818	-0.222566	0.0988196	0.153103	0.315519	-0.461061	0.000170818	-0.252083	0.0584178	-0.0419426	1	-0.375669	0.0109746	-0.208977	0.315841	0.118166
AFLA_019770	-0.559775	0.0203172	-0.445547	0.0711606	-0.366886	0.0786638	-0.0658308	0.846758	-0.116834	0.557191	0.0258346	0.958614	-0.114227	1	-0.301055	0.21923	-0.142668	0.774759	0.610493
AFLA_019780	-0.180445	0.497774	-0.340671	0.14911	0.0874082	0.711874	0.205944	0.357114	0.392189	0.0206109	0.113144	0.603445	0.160227	1	-0.118535	0.676239	0.279044	0.3731	0.440352
AFLA_019790	-0.446573	0.682044	0.485823	0.658974	-0.66464	0.380456	0.416381	0.65059	0.802712	0.201284	0.802712	0.2709	-0.932395	0.918211	-1.08102	0.189986	8.88178e-16	1	0.000207234
AFLA_019800	-0.0218696	1	-1.00813	0.0684954	-2.7266	3.18683e-07	-2.52616	3.41276e-06	1.13621	0.00566009	0.36676	0.46327	0.98626	0.556866	-0.200441	0.79892	0.769447	0.280067	0.000162005
AFLA_019810	-0.0361483	0.914142	0.138941	0.415079	-0.432315	0.000838755	-0.152949	0.286281	-0.00879746	0.99406	-0.161537	0.210298	-0.175089	0.895966	-0.279366	0.0471887	0.15274	0.482203	1
AFLA_019820	-0.466269	0.00152049	-0.613926	5.79421e-05	-0.562402	2.77793e-05	-0.144266	0.313948	-0.211608	0.0537921	-0.0992061	0.46197	0.147656	0.95697	-0.418136	0.00272314	-0.112402	0.658559	0.00821152
AFLA_019830	-0.390032	0.0116521	-0.447836	0.00403532	-0.306784	0.0212145	-0.255543	0.0752954	-0.275994	0.0179202	-0.607068	2.08104e-05	0.0578046	1	-0.0512415	0.830475	0.331074	0.071701	2.82517e-05
AFLA_019840	0.144865	0.147454	0.49596	2.21087e-06	0.384013	1.63173e-05	0.56709	4.4832e-08	1.02536	2.33466e-16	0.900743	2.35745e-13	-0.351095	0.0277784	-0.183078	0.0466031	0.124614	0.34254	0.587835
AFLA_019850	2.36427	2.48708e-08	2.74929	9.04257e-10	3.24346	8.53182e-13	2.81935	1.0576e-10	0.134516	0.669073	0.588596	0.0593251	-0.385018	0.941765	0.424111	0.255701	-0.45408	0.367668	8.61312e-05
AFLA_019860	-0.258578	0.0544154	-0.140062	0.348583	-0.222375	0.0525395	-0.412039	0.00093423	0.0965386	0.355015	-0.0593888	0.6515	-0.118516	0.997216	0.189664	0.149211	0.155927	0.40519	1
AFLA_019870	-0.0168348	1	0.106004	0.534323	-0.198295	0.0979293	-0.413707	0.00130762	-0.809692	9.90857e-10	-0.701622	2.52412e-07	-0.122839	0.997216	0.215412	0.109206	-0.108069	0.652078	1
AFLA_019880	-0.150356	0.289939	0.0819503	0.633208	-0.164519	0.150316	-0.0954949	0.478815	-0.105906	0.294805	-0.083356	0.494275	-0.232306	0.580915	-0.0690244	0.674357	-0.0225497	1	0.425637
AFLA_019890	-0.239782	0.132858	-0.23474	0.145784	-1.60141	1.51176e-14	-1.68764	1.59372e-14	-1.09206	1.1046e-11	-1.18657	3.03472e-11	-0.00504213	1	0.0862255	0.650641	0.0945103	0.761967	0.196276
AFLA_019900	-1.3254	0.000287351	-1.26945	0.00049708	-1.21279	0.000156167	-1.23292	0.000269904	-1.44246	1.77604e-06	-1.66475	1.25074e-06	-0.0559512	1	0.0201274	1	0.222289	0.756879	0.00077059
AFLA_019910	-0.642458	0.585538	-0.711813	0.546951	-0.0744214	0.997086	-0.965919	0.298125	0.716191	0.333986	0.0255163	1	0.0693552	1	0.891498	0.381954	0.690675	0.689804	1
AFLA_019920	-3.2744	9.81283e-05	-2.29662	0.0048931	-1.00416	0.15914	0.242503	0.824721	-0.627004	0.321172	-1.35522	0.0515901	-0.97778	0.890698	-1.24666	0.116009	0.728219	0.572337	1
AFLA_019930	0.504317	0.614878	-0.809219	0.367062	-3.03378	3.07884e-05	-2.98889	8.6967e-05	-0.310304	0.647644	-0.235727	0.786469	1.31354	0.654626	-0.044889	1	-0.0745767	1	0.586389
AFLA_019940	-1.68211	0.000442394	-2.83853	1.13695e-07	-2.10057	2.70696e-06	-2.15062	4.73921e-06	2.32433	3.90217e-08	2.03286	4.49165e-06	1.15642	0.249711	0.0500463	1	0.291465	0.758851	0.488806
AFLA_019950	-0.611392	0.111378	-1.10676	0.00321842	-0.939682	0.00373046	-0.707732	0.0398114	1.29857	1.96042e-05	1.09401	0.000848208	0.495372	0.83785	-0.23195	0.602328	0.204561	0.801354	0.124681
AFLA_019960	-0.829779	0.59099	0.430491	0.840809	0.89166	0.443437	2.12895	0.0641584	0.985032	0.30687	2.62065	0.0139094	-1.26027	0.955343	-1.23729	0.346579	-1.63562	0.331589	0.825954
AFLA_019970	0.485823	0.629722	0.485823	0.640705	0.727533	0.306832	0.727533	0.352226	1.52586	0.0103678	2.84043	6.89075e-05	3.55271e-15	1	2.66454e-15	1	-1.31457	0.181841	0.309555
AFLA_019980	0.194904	0.998156	1.23455	0.465238	-0.636463	0.660752	0.513559	0.770319	0.12973	0.960924	-0.0599495	1	-1.03965	1	-1.15002	0.466582	0.18968	1	1
AFLA_019990	1.77636e-15	1	-1.77636e-15	1	3.55271e-15	1	-0.383237	0.468179	0.532849	0.17268	0.532849	0.238132	3.55271e-15	1	0.383237	0.511115	1.77636e-15	1	0.149288
AFLA_020000	2.46783	8.75001e-05	2.09371	0.000695919	-1.22701	0.0187161	-0.828091	0.14785	-0.347404	0.478524	-0.432061	0.439312	0.374116	1	-0.39892	0.575875	0.0846572	1	0.05229
AFLA_020010	-3.73325	2.2186e-10	-4.33391	5.48196e-12	-6.19227	1.72991e-17	-4.98459	2.96274e-14	-2.42287	1.36567e-08	-1.81708	2.22081e-05	0.600661	0.856168	-1.20768	0.00643512	-0.605789	0.338837	0.42587
AFLA_020020	-1.53929	1.13522e-05	-1.61358	5.49902e-06	0.276211	0.360434	0.0991133	0.823202	0.0938347	0.757238	0.987685	0.000670832	0.0742867	1	0.177097	0.66889	-0.893851	0.0170749	1
AFLA_020030	-2.32198	0.0519069	-1.5432	0.22585	-0.995765	0.357931	-1.46096	0.194645	0.562374	0.566023	0.294051	0.831115	-0.778781	1	0.465197	0.781226	0.268323	0.980859	0.807939
AFLA_020040	0.947798	0.483215	0.947798	0.494308	-0.63119	0.576865	-0.100556	0.999781	2.92475	0.000993257	2.92475	0.00333914	3.55271e-15	1	-0.530633	0.728102	1.77636e-15	1	1.33724e-08
AFLA_020050	-1.38885	0.187834	-1.83667	0.0734118	0.544563	0.580592	2.1988	0.0169341	4.04245	1.7781e-06	1.27038	0.143747	0.447817	1	-1.65424	0.0884668	2.77206	0.0147267	0.020272
AFLA_020060	-0.518718	0.115747	0.0709667	0.942407	0.870336	0.00185479	1.50858	2.95587e-06	-0.319192	0.191413	-0.373571	0.181333	-0.589685	0.545017	-0.638242	0.0371255	0.0543792	1	1
AFLA_020070	0.235284	0.674922	0.158232	0.82035	2.20252	1.90558e-07	2.17514	6.98623e-07	1.52984	1.16975e-05	2.01252	9.45412e-07	0.0770512	1	0.0273774	1	-0.482681	0.425075	0.233177
AFLA_020080	0.778843	0.00250789	0.671426	0.00917917	0.231521	0.319655	0.287069	0.246531	0.68737	0.000579951	0.726531	0.00122239	0.107417	1	-0.0555485	0.921102	-0.0391607	1	0.990113
AFLA_020090	-0.459828	0.222101	-0.104354	0.882895	1.26709	7.68853e-05	0.546994	0.0972056	-3.33677	6.85119e-15	-3.8788	3.38646e-15	-0.355474	0.958247	0.720101	0.0328043	0.542028	0.230038	0.740195
AFLA_020100	-0.486257	0.00228589	-0.622123	0.000150528	-0.440882	0.00149229	-0.273581	0.0626942	-0.725354	1.86988e-07	-0.896561	3.15887e-08	0.135866	1	-0.167301	0.313982	0.171207	0.459496	0.412468
AFLA_020110	-0.818918	0.00502813	-0.709238	0.015503	-0.173929	0.537783	0.0596303	0.905463	-0.807191	0.000400992	-0.825693	0.00122051	-0.109679	1	-0.23356	0.472588	0.018502	1	0.176625
AFLA_020120	-0.231185	0.952368	0.541748	0.756267	1.24599	0.234878	0.862749	0.478049	0.702003	0.458241	0.0810118	0.99497	-0.772933	1	0.383237	0.833964	0.620991	0.812609	1
AFLA_020130	-0.157235	0.167927	0.00609046	1	-0.299765	0.0016422	0.0202977	0.919873	-0.270057	0.00128869	-0.0737439	0.464179	-0.163326	0.740398	-0.320063	0.00214372	-0.196313	0.142263	0.221757
AFLA_020140	-0.223041	0.577297	-0.3297	0.369607	0.790012	0.00490839	0.40848	0.184646	-0.688749	0.00518287	-0.446592	0.110736	0.106658	1	0.381532	0.250539	-0.242157	0.675643	1
AFLA_020150	-0.327326	0.0143074	-0.160749	0.271975	-0.705305	1.36278e-07	-0.310344	0.0117114	-0.357344	0.000592776	-0.338052	0.00353732	-0.166577	0.87447	-0.394961	0.00205078	-0.0192922	1	0.805245
AFLA_020160	1.25255	0.468601	1.25255	0.479476	1.46721	0.269171	1.00351	0.516217	1.74773	0.118289	3.30042	0.00954909	3.55271e-15	1	0.463703	0.843214	-1.5527	0.475894	2.6029e-06
AFLA_020170	0.866532	0.462523	0.872205	0.469765	0.302949	0.793436	-0.588105	0.590886	1.068	0.165987	0.960721	0.285716	-0.00567339	1	0.891054	0.420921	0.107281	1	0.041737
AFLA_020180	0.440308	0.723008	1.86218	0.041648	0.992828	0.214409	-0.625361	0.504912	0.275371	0.735301	0.0644631	0.992279	-1.42187	0.696624	1.61819	0.061466	0.210907	0.977066	0.469199
AFLA_020190	0.454035	0.800264	1.05381	0.445671	2.87442	0.00471154	2.38052	0.0276933	-0.962882	0.28912	-0.231959	0.877698	-0.599776	1	0.493896	0.759394	-0.730923	0.756736	0.317414
AFLA_020200	-1.92626	0.0626268	-2.24888	0.0293341	1.14568	0.205933	1.8093	0.0556903	0.256086	0.792587	0.689221	0.466342	0.322619	1	-0.66362	0.582724	-0.433134	0.877116	0.820342
AFLA_020210	-0.295665	0.264624	-0.543545	0.0280231	-1.18101	7.31756e-07	-0.701984	0.00204558	-0.975444	2.26997e-06	-0.935247	3.08533e-05	0.24788	0.95697	-0.479029	0.0410294	-0.0401963	1	0.6408
AFLA_020220	0.419232	0.774791	1.71421	0.0953975	0.0153812	1	0.753452	0.462178	1.6944	0.0238546	0.422135	0.671179	-1.29498	0.850008	-0.73807	0.516214	1.27226	0.353709	0.580343
AFLA_020230	1.88499	1.43078e-05	1.54217	0.000253468	-0.847095	0.016331	0.00580491	1	0.595319	0.0534399	0.653574	0.0632298	0.342821	1	-0.8529	0.029133	-0.058254	1	0.709457
AFLA_020240	0.117119	0.788762	-0.598373	0.0430967	0.191675	0.48834	-0.0425916	0.95296	1.96798	3.75099e-11	1.76998	7.01911e-09	0.715492	0.25247	0.234267	0.470662	0.198004	0.719616	0.00082372
AFLA_020250	-0.245392	0.146013	-0.217121	0.211746	-0.265825	0.0576113	-0.402727	0.00708714	-0.451176	0.000378279	-0.387186	0.00569465	-0.028271	1	0.136902	0.443024	-0.0639896	0.893493	0.566036
AFLA_020260	-0.167839	0.254862	-0.129123	0.414937	0.285995	0.0151288	0.315301	0.0121882	0.593944	4.80802e-07	0.511016	4.16705e-05	-0.0387153	1	-0.0293068	0.921851	0.0829277	0.765121	0.918525
AFLA_020270	-0.645326	0.123186	-0.252775	0.636581	-1.04219	0.00309292	-0.872558	0.0192634	-0.442346	0.150231	-0.0831484	0.871052	-0.392551	0.977467	-0.16963	0.761401	-0.359197	0.579268	0.629793
AFLA_020280	0.398924	0.0146698	0.415104	0.0114646	0.688671	7.23406e-06	0.29854	0.0482343	-0.371687	0.0029364	-0.165727	0.251122	-0.0161807	1	0.390132	0.0120378	-0.20596	0.362069	0.393178
AFLA_020290	0.288909	0.139439	0.63011	0.000968747	1.30508	4.0318e-10	0.91596	1.70068e-06	-0.0176539	0.958219	0.52615	0.00138453	-0.341202	0.563033	0.389124	0.0302847	-0.543804	0.010475	0.00457737
AFLA_020300	0.0828286	0.817298	0.0720051	0.86511	0.473101	0.0155376	-0.00506026	1	0.301607	0.0779267	0.142232	0.503785	0.0108234	1	0.478161	0.0272847	0.159375	0.707084	0.669778
AFLA_020310	-0.192393	0.0865798	-0.157704	0.176128	0.600685	6.83677e-08	0.623839	9.79635e-08	-0.224235	0.0071632	-0.259263	0.00629024	-0.0346889	1	-0.0231538	0.924482	0.0350278	0.932287	0.0335511
AFLA_020320	0.505003	0.597795	0.505003	0.610836	-0.954868	0.155936	8.88178e-16	1	0.7246	0.217083	0.7246	0.287221	3.55271e-15	1	-0.954868	0.220475	1.77636e-15	1	1
AFLA_020330	0.00372286	1	0.0529146	0.877243	0.0236285	0.946292	0.518909	0.00146531	0.893857	2.01798e-08	0.710123	1.23474e-05	-0.0491917	1	-0.495281	0.00307318	0.183735	0.475779	0.758888
AFLA_020340	0.721829	1.66239e-06	0.737113	1.18105e-06	0.207198	0.0827582	0.377071	0.00315063	0.337334	0.00147176	0.300158	0.011333	-0.015284	1	-0.169873	0.226217	0.0371763	0.958769	0.0436239
AFLA_020350	-0.0974555	0.554236	0.0462195	0.845019	0.613878	2.09762e-06	0.380758	0.00241312	0.249598	0.0143585	0.264698	0.0224164	-0.143675	0.941635	0.23312	0.0737266	-0.0150995	1	0.361381
AFLA_020360	0.384438	0.00484345	0.397694	0.00375846	0.0929647	0.470202	-0.138225	0.30032	0.489412	1.21997e-05	0.709754	1.623e-07	-0.0132569	1	0.23119	0.0790565	-0.220342	0.201329	0.260063
AFLA_020370	-0.730937	2.5457e-05	-0.498703	0.00268522	0.162001	0.273832	0.0174198	0.984941	-0.0333537	0.844409	0.120603	0.425218	-0.232234	0.79184	0.144582	0.422467	-0.153957	0.550685	0.150218
AFLA_020380	0.60604	0.00201941	0.847257	3.68199e-05	0.0318993	0.919594	0.407244	0.0233302	0.531672	0.000478891	0.907103	1.31657e-06	-0.241217	0.878425	-0.375345	0.0445832	-0.375431	0.110539	0.241961
AFLA_020390	-0.0697824	0.695189	0.0228447	0.975036	0.139049	0.240467	-0.164538	0.192696	0.210025	0.0354786	-0.151998	0.189974	-0.092627	1	0.303587	0.0160235	0.362023	0.016434	0.046087
AFLA_020400	-0.366048	0.0289393	-0.454119	0.00684186	0.0783063	0.643339	-0.171339	0.293891	0.00934072	0.998259	-0.258436	0.072262	0.0880704	1	0.249646	0.127919	0.267777	0.206267	0.0235821
AFLA_020410	-0.655973	0.0207205	-0.495093	0.0901198	-0.00635758	1	0.135351	0.673748	0.832767	0.000196451	0.939807	0.000206611	-0.16088	1	-0.141709	0.698698	-0.10704	0.901606	1
AFLA_020420	-0.174199	0.426412	-0.260818	0.201276	-1.7597	3.78893e-13	-1.47732	1.1323e-10	-2.41734	2.05473e-18	-2.18786	1.04888e-15	0.086619	1	-0.28238	0.132764	-0.229482	0.390339	0.622194
AFLA_020430	-0.690161	0.273943	-0.258242	0.768293	-1.07591	0.0315571	-1.21106	0.0236802	-1.71202	0.00019187	-1.80424	0.000458306	-0.431919	1	0.135143	0.908306	0.0922162	1	0.00183867
AFLA_020440	0.597324	0.145351	0.486177	0.257086	-0.979532	0.00417022	-1.08127	0.00306925	-0.627871	0.0343458	-0.655421	0.0526527	0.111147	1	0.101734	0.889114	0.0275506	1	0.0637587
AFLA_020450	-0.208762	0.562211	-0.317976	0.333431	0.32043	0.220873	0.240821	0.418969	0.506187	0.0223359	0.681713	0.00720211	0.109215	1	0.0796092	0.877733	-0.175526	0.77169	0.0556373
AFLA_020460	-0.0413171	0.847383	-0.0137487	1	0.159169	0.148809	0.116167	0.352226	-0.419053	3.65512e-05	-0.287365	0.00796918	-0.0275684	1	0.0430023	0.822067	-0.131688	0.476794	1
AFLA_020470	0.284035	0.0287663	0.182561	0.184853	0.459342	8.95515e-05	0.473395	0.000133022	0.466648	1.16007e-05	0.241542	0.029592	0.101473	1	-0.0140529	0.999852	0.225106	0.162143	0.322237
AFLA_020480	0.0234112	1	0.0375	0.964242	0.407297	0.0170763	0.254638	0.176122	-1.27486	1.20038e-10	-0.925655	1.23819e-06	-0.0140888	1	0.152659	0.496137	-0.349203	0.155033	0.259027
AFLA_020490	-0.230029	0.366498	-0.205711	0.44172	-0.00558862	1	-0.0836104	0.765468	-0.0147642	0.988685	-0.136032	0.52614	-0.024318	1	0.0780218	0.821317	0.121268	0.811226	5.67304e-05
AFLA_020500	-0.188018	0.509026	-0.411142	0.0960761	-0.345579	0.0966085	-0.613023	0.00553568	-0.137447	0.47732	-0.159135	0.47375	0.223124	0.988628	0.267444	0.280176	0.0216887	1	0.243196
AFLA_020510	-0.326913	0.197069	-0.198827	0.491524	0.809734	0.000167631	0.31704	0.161998	1.45932	4.26949e-10	0.899553	3.98054e-05	-0.128086	1	0.492693	0.0314028	0.559772	0.0447557	1
AFLA_020520	0.261331	0.214155	0.161624	0.500248	0.787014	1.76529e-05	0.695834	0.000217213	0.302772	0.0419734	0.990032	3.48184e-07	0.0997065	1	0.0911802	0.72874	-0.68726	0.00193223	0.0328295
AFLA_020530	-0.873503	0.529697	-1.45914	0.245272	-1.9563	0.0501363	-1.82336	0.0912805	-0.255738	0.823911	-0.162639	0.930854	0.585633	1	-0.132937	0.995225	-0.0930988	1	0.850975
AFLA_020540	-0.331753	0.0236095	-0.383349	0.00912344	-0.254938	0.0431478	-0.0650542	0.701228	-0.0135309	0.959736	-0.0357938	0.835193	0.0515963	1	-0.189884	0.198344	0.0222629	1	1
AFLA_020550	0.492227	0.101249	0.327523	0.312919	-0.0981372	0.759469	0.252184	0.390133	0.205612	0.372717	0.421177	0.0951815	0.164704	1	-0.350321	0.241365	-0.215566	0.684184	0.610973
AFLA_020560	-0.495449	0.0320635	-0.599114	0.00954138	-0.0805038	0.746029	0.0943187	0.729043	0.113548	0.549713	0.0900344	0.700872	0.103665	1	-0.174822	0.503442	0.0235133	1	0.169965
AFLA_020570	-0.279216	0.0869587	-0.195728	0.261133	-0.181731	0.198581	-0.06685	0.722485	-0.405204	0.00102829	-0.282836	0.0388115	-0.0834879	1	-0.114881	0.532729	-0.122368	0.662406	0.589229
AFLA_020580	-0.422186	0.0035015	-0.128271	0.451736	0.131939	0.312029	-0.0233563	0.939986	-0.245127	0.0239914	-0.243675	0.0488808	-0.293916	0.440376	0.155296	0.301907	-0.00145209	1	0.793095
AFLA_020590	-0.600623	0.174742	-0.510112	0.268795	1.21269	0.00106018	1.39807	0.000441488	2.74268	9.13475e-11	2.87739	5.31972e-10	-0.0905113	1	-0.185381	0.744957	-0.134709	0.931841	0.0307909
AFLA_020600	-0.400521	0.0731065	-0.131007	0.656182	-0.10144	0.649803	0.127407	0.591959	0.00240012	1	-0.0317748	0.927032	-0.269514	0.881839	-0.228847	0.32149	0.0341749	1	0.023852
AFLA_020610	1.82424	0.0147242	2.72413	0.000382201	-3.54336	1.01041e-06	-2.47201	0.000458607	-1.51682	0.00747191	-1.3815	0.0311539	-0.899886	0.891459	-1.07135	0.147159	-0.135318	1	0.000276761
AFLA_020620	-0.912302	0.0280422	-0.754867	0.0757388	-2.26145	6.87529e-08	-1.95163	2.96187e-06	0.201933	0.554793	0.182261	0.657352	-0.157435	1	-0.309827	0.511115	0.0196716	1	0.706878
AFLA_020630	-0.107774	0.916914	0.273433	0.641989	0.354944	0.387845	0.101453	0.885078	-0.616133	0.065777	-0.777193	0.0413263	-0.381207	1	0.253491	0.642393	0.16106	0.908879	0.0594779
AFLA_020640	0.192949	0.605984	0.265713	0.449573	0.273284	0.310383	0.878748	0.00154182	0.520991	0.020161	0.526475	0.0390488	-0.0727641	1	-0.605464	0.0332511	-0.00548413	1	0.00239848
AFLA_020650	0.692788	0.0223677	0.412769	0.202501	0.495801	0.058102	0.72033	0.00984621	1.31369	5.07907e-07	1.30749	4.73234e-06	0.280019	0.992317	-0.224529	0.516214	0.00619346	1	0.176877
AFLA_020660	-0.596014	0.199435	-0.432044	0.390505	-1.07528	0.00472514	-0.29523	0.520405	0.213912	0.555053	0.00547941	1	-0.16397	1	-0.780053	0.0648962	0.208433	0.84523	0.360718
AFLA_020670	-0.166974	0.594848	-0.096993	0.810621	-1.07368	5.93151e-06	-0.378314	0.108464	0.083715	0.70773	-0.0183729	0.99092	-0.0699807	1	-0.69537	0.00386339	0.102088	0.888089	0.528966
AFLA_020680	0.134716	0.450916	0.155169	0.37716	-0.291855	0.0279597	0.00998513	1	0.124727	0.297323	0.151403	0.268873	-0.0204532	1	-0.301841	0.04109	-0.0266762	1	5.39881e-09
AFLA_020690	-1.37377	8.09201e-06	-1.51237	1.63351e-06	-2.8739	4.56271e-14	-2.59654	2.66959e-12	-1.74368	4.85559e-10	-2.05915	1.82474e-10	0.138604	1	-0.277357	0.36683	0.315468	0.450312	6.33829e-06
AFLA_020700	0.718816	4.48198e-06	0.744522	2.54304e-06	0.0862732	0.540296	0.417776	0.00199942	0.290445	0.00834907	0.318285	0.0109068	-0.025706	1	-0.331502	0.0163138	-0.02784	0.997588	1.39125e-05
AFLA_020710	0.140551	0.541441	0.340785	0.0816541	0.331627	0.043109	-0.289729	0.103558	-0.499341	0.000728629	-0.443045	0.00695876	-0.200235	0.942711	0.621356	0.000718063	-0.0562963	0.943992	2.95115e-05
AFLA_020720	0.548983	0.000820608	0.941079	2.40463e-07	-0.153011	0.293557	-0.0521554	0.803521	-0.504709	9.04938e-05	0.220486	0.114926	-0.392097	0.26679	-0.100856	0.600698	-0.725194	7.25405e-05	0.0500895
AFLA_020730	-0.193842	0.322608	-0.0851774	0.744001	-0.051562	0.802387	0.130966	0.476453	-0.299932	0.0251486	-0.75054	6.78408e-06	-0.108664	1	-0.182528	0.329805	0.450608	0.0272272	0.176625
AFLA_020740	-0.0775812	0.874418	-0.133751	0.72054	-0.628296	0.00558541	-0.378599	0.123131	-0.0633601	0.801499	-0.0890984	0.74683	0.0561693	1	-0.249697	0.372606	0.0257383	1	0.977702
AFLA_020750	0.229403	0.344566	0.206356	0.416181	0.965939	3.34942e-06	0.774612	0.000199476	0.0328007	0.900771	0.0515618	0.84309	0.0230478	1	0.191327	0.423869	-0.018761	1	0.127502
AFLA_020760	-0.288658	0.0602757	-0.160793	0.345117	0.752171	4.45217e-07	0.240497	0.0890673	0.122538	0.297722	0.116418	0.400358	-0.127865	1	0.511674	0.0004999	0.00612	1	0.397332
AFLA_020770	0.573053	0.351333	0.403102	0.560738	-1.34043	0.00510384	-0.306348	0.611813	-3.75182	3.29341e-11	-3.79117	4.67768e-10	0.169951	1	-1.03408	0.0508243	0.0393455	1	0.113961
AFLA_020780	-0.645854	0.0111473	-0.910252	0.000471105	-0.260318	0.253445	-0.328336	0.174177	-0.255221	0.189213	-0.0492846	0.881453	0.264398	0.94756	0.0680173	0.881227	-0.205936	0.634635	0.160609
AFLA_020790	0.116373	0.39913	0.201163	0.111111	-0.0625033	0.606572	-0.0178905	0.952517	0.0652552	0.511586	0.0644554	0.580977	-0.08479	1	-0.0446128	0.802224	0.000799737	1	0.794355
AFLA_020800	-0.170712	0.897471	-0.673649	0.34825	0.0207688	1	-0.878409	0.144815	-0.619424	0.205123	0.76553	0.169556	0.502937	1	0.899177	0.155274	-1.38495	0.0672878	0.303452
AFLA_020810	-3.99574	2.51462e-06	-3.36871	4.14207e-05	-5.36338	5.10285e-10	-4.43605	9.70282e-08	-2.1347	0.000468554	-2.08779	0.00216162	-0.62703	1	-0.927336	0.246033	-0.0469111	1	0.0897961
AFLA_020820	-0.663702	0.686328	-0.649843	0.708552	0.751131	0.526934	0.260172	0.900363	0.750605	0.447951	-2.04084	0.0536639	-0.0138585	1	0.49096	0.778313	2.79145	0.0528964	0.000472004
AFLA_020830	-0.320552	0.041771	-0.405909	0.00969966	-0.736971	1.10175e-06	-0.350391	0.0148889	-0.36585	0.00226343	-0.38134	0.00479774	0.0853568	1	-0.38658	0.00940695	0.0154899	1	0.00736695
AFLA_020840	-0.455629	0.0130925	-0.368095	0.0489593	0.708123	2.81843e-05	0.650273	0.00020115	-0.389925	0.00525906	-0.340899	0.0304232	-0.0875345	1	0.05785	0.842293	-0.0490263	0.960073	1.0681e-06
AFLA_020850	-0.232073	0.504879	-0.086072	0.884365	0.550652	0.0290352	-0.0184858	1	-1.33827	1.93157e-07	-0.899542	0.000519315	-0.146001	1	0.569138	0.0426631	-0.438731	0.245174	0.231768
AFLA_020860	2.95377	0.00607521	3.19497	0.00319822	3.72614	0.000123045	3.058	0.00222594	4.57638	7.26136e-07	5.70129	1.16885e-07	-0.241204	1	0.668139	0.603142	-1.12491	0.478192	0.176625
AFLA_020870	-0.601517	0.000183654	-0.578781	0.000309397	-0.608534	2.40107e-05	0.0386473	0.869104	0.129207	0.284997	0.232848	0.0834034	-0.0227358	1	-0.647181	3.71343e-05	-0.103641	0.728622	0.378479
AFLA_020880	-0.250975	0.405792	0.000923277	1	-0.339665	0.14442	-0.135627	0.647937	0.365612	0.0676408	0.311901	0.178529	-0.251899	0.985447	-0.204038	0.497435	0.0537115	0.991172	0.315878
AFLA_020890	-0.505905	0.000211491	-0.295608	0.0276259	0.0629653	0.639077	0.0448764	0.790025	-0.12321	0.226876	0.020169	0.920573	-0.210296	0.694863	0.018089	0.981667	-0.143379	0.459663	0.52469
AFLA_020900	-1.47568	5.44996e-09	-1.92508	1.00065e-11	-1.40252	1.08855e-09	-1.56933	2.95097e-10	-1.49218	1.24831e-11	-1.63064	2.98411e-11	0.449401	0.403605	0.166815	0.481473	0.138459	0.735213	0.0105009
AFLA_020910	-0.554402	0.00272568	-0.395268	0.0339884	0.822088	2.84304e-06	0.2436	0.162425	-0.554098	0.000147336	-1.19972	1.54805e-09	-0.159133	1	0.578488	0.00109673	0.645621	0.00179375	0.993022
AFLA_020920	-1.0509	3.87188e-05	-1.01315	6.99122e-05	0.570045	0.00685883	-0.158065	0.537951	-1.11302	1.92333e-07	-1.36268	3.942e-08	-0.037745	1	0.728111	0.00183698	0.249662	0.490562	3.33286e-08
AFLA_020930	-1.92228	9.92872e-06	-2.14289	1.63695e-06	0.925422	0.00865946	1.01356	0.00708714	0.360388	0.251553	0.823544	0.018664	0.220609	1	-0.0881401	0.921315	-0.463156	0.426035	0.136918
AFLA_020940	-1.87608	0.00253287	-2.36717	0.000208361	0.906756	0.0914891	1.08559	0.0581261	1.1609	0.0129465	2.36244	3.10397e-05	0.491088	1	-0.178839	0.863375	-1.20154	0.106318	0.670121
AFLA_020950	-0.478304	0.00487119	-0.536638	0.00175411	0.439427	0.00292407	0.662859	5.41961e-05	1.81606	2.19766e-16	1.82457	6.12541e-15	0.0583339	1	-0.223433	0.189797	-0.00851026	1	0.559818
AFLA_020960	-0.667832	0.00078329	-0.693484	0.00052465	0.142613	0.436429	-0.40801	0.0236802	0.759001	3.61414e-06	0.596016	0.000570521	0.0256523	1	0.550623	0.00330455	0.162985	0.617265	0.55706
AFLA_020970	-0.0145572	0.983251	-0.00986102	1	0.156951	0.0486053	0.293535	0.000710774	0.62638	3.42387e-11	0.681438	8.8168e-11	-0.00469617	1	-0.136584	0.132648	-0.0550583	0.771991	1.68139e-05
AFLA_020980	-0.648051	0.000103981	-0.681459	5.53198e-05	-0.82264	2.60014e-07	-0.414591	0.00536626	-0.965643	6.30781e-10	-1.127	3.11739e-10	0.033408	1	-0.408049	0.00786474	0.161359	0.507044	2.26538e-08
AFLA_020990	-0.835771	1.02658e-05	-0.968973	8.30006e-07	-0.754424	6.42217e-06	-0.443411	0.00686873	-0.296464	0.0267912	-0.487709	0.00167677	0.133201	1	-0.311013	0.0692534	0.191245	0.460993	0.00906282
AFLA_021000	0.125407	0.575316	0.104937	0.669338	0.135448	0.422817	0.153985	0.398368	0.224656	0.101193	0.161565	0.31921	0.0204704	1	-0.0185373	1	0.0630909	0.916719	0.350846
[truncated: 11,486 more rows]
